# Supplementary material for: Risk Assessment and Multi-objective Optimization of Current Sharing for Parallel- connected Multiple Modules of DAB Converters
Source: Research Square preprint supplement (doi:10.21203/rs.3.rs-7418697/v1), 2025-08-29
Supplement: Supplementary file 1 [file 8497f7723c37f50b13b19148.xlsx]

## Sheet: simulink data
t	v1	eqv1	v0	D0	D1	IL	k	ILmax1	ILmax2	Ilmax	Preflux
0	300	272.727	28	0.133236	0.129936	50	1.33929	0.431748	-0.156745	0.431748	0.0128465			5.5uH	5uH	4.5uH
1e-07	300	272.934	28.0025	0.132747	0.129197	41.8905	1.33929	0.431757	-0.157004	0.431757	0.0130253		io	213.607	215.691	218.463
2e-07	300	273.1	28.0046	0.132352	0.1286	33.7724	1.33929	0.431763	-0.157165	0.431763	0.0131371		CII	0.00966255	0	-0.0129752
3e-07	300	273.204	28.0058	0.132106	0.128229	23.1879	1.33929	0.431765	-0.157241	0.431765	0.0131897
4e-07	300	273.253	28.0064	0.131991	0.128056	12.6284	1.33929	0.431764	-0.157219	0.431764	0.0131742
5e-07	300	273.238	28.0062	0.132025	0.128107	2.0963	1.33929	0.43176	-0.157099	0.43176	0.0130908
6e-07	300	273.161	28.0053	0.132208	0.128383	0.298606	1.33929	0.431756	-0.15698	0.431756	0.0130085
7e-07	300	273.085	28.0044	0.132389	0.128656	0.00480435	1.33929	0.431751	-0.156844	0.431751	0.0129146
8e-07	300	272.997	28.0033	0.132596	0.128969	-0.00214596	1.33929	0.431746	-0.156708	0.431746	0.0128208
9e-07	300	272.91	28.0022	0.132804	0.129283	0.00168782	1.33929	0.431742	-0.156572	0.431742	0.0127273
1e-06	300	272.822	28.0012	0.133012	0.129597	-0.00109855	1.33929	0.431737	-0.156436	0.431737	0.0126342
1.1e-06	300	272.734	28.0001	0.133219	0.129911	0.000232522	1.33929	0.431732	-0.156299	0.431732	0.0125414
1.2e-06	300	272.647	27.999	0.133427	0.130224	0.000552007	1.33929	0.431727	-0.156163	0.431727	0.012449
1.3e-06	300	272.559	27.9979	0.133635	0.130538	-0.00137048	1.33929	0.431723	-0.156027	0.431723	0.0123569
1.4e-06	300	272.471	27.9969	0.133843	0.130852	0.00187326	1.33929	0.431718	-0.155891	0.431718	0.0122651
1.5e-06	300	272.384	27.9958	0.13405	0.131166	-0.00221555	1.33929	0.431713	-0.155755	0.431713	0.0121737
1.6e-06	300	272.296	27.9947	0.134258	0.13148	0.00211913	1.33929	0.431708	-0.155619	0.431708	0.0120827
1.7e-06	300	272.209	27.9937	0.134466	0.131793	-0.0018255	1.33929	0.431703	-0.155482	0.431703	0.0119919
1.8e-06	300	272.121	27.9926	0.134673	0.132107	0.00115126	1.33929	0.431699	-0.155346	0.431699	0.0119016
1.9e-06	300	272.033	27.9915	0.134881	0.132421	-0.000421023	1.33929	0.431694	-0.15521	0.431694	0.0118115
2e-06	300	271.946	27.9904	0.135089	0.132735	-0.000483066	1.33929	0.431689	-0.155074	0.431689	0.0117219
2.1e-06	300	271.858	27.9894	0.135297	0.133048	0.0384686	1.33929	0.431684	-0.154938	0.431684	0.0116325
2.2e-06	300	271.77	27.9883	0.135504	0.133362	-0.00221154	1.33929	0.431679	-0.154802	0.431679	0.0115435
2.3e-06	300	271.683	27.9872	0.135712	0.133676	0.00174965	1.33929	0.431675	-0.154666	0.431675	0.0114549
2.4e-06	300	271.595	27.9862	0.13592	0.133989	-0.00048571	1.33929	0.43167	-0.15453	0.43167	0.0113666
2.5e-06	300	271.508	27.9851	0.136127	0.134303	-0.000313661	1.33929	0.431665	-0.154393	0.431665	0.0112787
2.6e-06	300	271.42	27.984	0.136335	0.134617	1.12936	1.33929	0.431661	-0.154264	0.431661	0.0111953
2.7e-06	300	271.337	27.983	0.136532	0.134915	2.25192	1.33929	0.431656	-0.154143	0.431656	0.0111179
2.8e-06	300	271.259	27.9821	0.136716	0.135193	3.7356	1.33929	0.431653	-0.154036	0.431653	0.0110496
2.9e-06	300	271.19	27.9812	0.136879	0.135439	5.21733	1.33929	0.431649	-0.153942	0.431649	0.0109892
3e-06	300	271.129	27.9805	0.137024	0.135658	6.69513	1.33929	0.431646	-0.153861	0.431646	0.0109377
3.1e-06	300	271.077	27.9798	0.137148	0.135845	8.16898	1.33929	0.431644	-0.153793	0.431644	0.0108949
3.2e-06	300	271.034	27.9793	0.137251	0.136	9.63888	1.33929	0.431642	-0.153739	0.431642	0.0108608
3.3e-06	300	270.999	27.9789	0.137333	0.136124	11.1048	1.33929	0.431641	-0.153699	0.431641	0.0108353
3.4e-06	300	270.973	27.9786	0.137394	0.136217	12.5668	1.33929	0.43164	-0.153672	0.43164	0.0108185
3.5e-06	300	270.956	27.9783	0.137435	0.136278	14.0248	1.33929	0.431639	-0.153659	0.431639	0.0108102
3.6e-06	300	270.947	27.9782	0.137455	0.136308	15.4788	1.33929	0.431639	-0.15366	0.431639	0.0108104
3.7e-06	300	270.948	27.9782	0.137454	0.136308	16.9289	1.33929	0.43164	-0.153674	0.43164	0.0108192
3.8e-06	300	270.957	27.9784	0.137433	0.136276	18.3749	1.33929	0.431641	-0.153701	0.431641	0.0108364
3.9e-06	300	270.974	27.9786	0.137391	0.136213	19.8169	1.33929	0.431641	-0.153701	0.431641	0.0108364
3.96e-06	300	270.974	27.9786	0.137391	0.136213	19.8169	1.33929	0.431642	-0.153741	0.431642	0.0108621
4e-06	300	271	27.9789	0.137329	0.136119	21.255	1.33929	0.431644	-0.153799	0.431644	0.0108984
4.1e-06	300	271.037	27.9793	0.137242	0.135987	22.688	1.33929	0.431647	-0.153866	0.431647	0.0109411
4.2e-06	300	271.08	27.9799	0.137139	0.135832	24.1179	1.33929	0.431649	-0.153947	0.431649	0.0109924
4.3e-06	300	271.132	27.9805	0.137016	0.135646	25.5439	1.33929	0.431653	-0.154041	0.431653	0.0110522
4.4e-06	300	271.193	27.9812	0.136873	0.13543	26.9657	1.33929	0.431656	-0.154148	0.431656	0.0111207
4.5e-06	300	271.262	27.9821	0.13671	0.135183	28.3836	1.33929	0.431661	-0.154268	0.431661	0.0111978
4.6e-06	300	271.339	27.983	0.136526	0.134906	29.7964	1.33929	0.431665	-0.154405	0.431665	0.0112858
4.7e-06	300	271.427	27.9841	0.136318	0.134591	31.2061	1.33929	0.431671	-0.154551	0.431671	0.0113805
4.8e-06	300	271.521	27.9853	0.136094	0.134254	32.6117	1.33929	0.431676	-0.154711	0.431676	0.0114842
4.9e-06	300	271.624	27.9865	0.135851	0.133886	34.0133	1.33929	0.431682	-0.154883	0.431682	0.0115968
5e-06	300	271.735	27.9879	0.135588	0.133488	35.4108	1.33929	0.431689	-0.155069	0.431689	0.0117185
5.1e-06	300	271.855	27.9893	0.135304	0.13306	36.8042	1.33929	0.431696	-0.155268	0.431696	0.0118495
5.2e-06	300	271.983	27.9909	0.135001	0.132602	38.1935	1.33929	0.431703	-0.155479	0.431703	0.0119897
5.3e-06	300	272.119	27.9926	0.134679	0.132115	39.5787	1.33929	0.431711	-0.155704	0.431711	0.0121395
5.4e-06	300	272.263	27.9943	0.134336	0.131598	40.9598	1.33929	0.43172	-0.155941	0.43172	0.0122988
5.5e-06	300	272.416	27.9962	0.133974	0.131051	42.3368	1.33929	0.431728	-0.156191	0.431728	0.0124678
5.6e-06	300	272.577	27.9982	0.133592	0.130474	43.7096	1.33929	0.431738	-0.156454	0.431738	0.0126468
5.7e-06	300	272.746	28.0002	0.133191	0.129868	45.0784	1.33929	0.431747	-0.15673	0.431747	0.0128358
5.8e-06	300	272.924	28.0024	0.132771	0.129233	46.4429	1.33929	0.431757	-0.157018	0.431757	0.0130351
5.9e-06	300	273.11	28.0047	0.13233	0.128568	47.8034	1.33929	0.431768	-0.15732	0.431768	0.0132447
6e-06	300	273.303	28.007	0.131871	0.127874	49.1597	1.33929	0.431778	-0.157609	0.431778	0.0134477
6.1e-06	300	273.49	28.0093	0.13143	0.127207	46.0254	1.33929	0.431788	-0.15788	0.431788	0.0136393
6.2e-06	300	273.664	28.0115	0.131016	0.126582	42.8958	1.33929	0.431796	-0.158109	0.431796	0.0138019
6.3e-06	300	273.811	28.0132	0.130667	0.126055	38.2799	1.33929	0.431802	-0.158295	0.431802	0.013935
6.4e-06	300	273.931	28.0147	0.130383	0.125627	33.6754	1.33929	0.431807	-0.158438	0.431807	0.0140382
6.5e-06	300	274.024	28.0158	0.130164	0.125296	29.0823	1.33929	0.43181	-0.158502	0.43181	0.0140836
6.6e-06	300	274.064	28.0163	0.130068	0.12515	26.2946	1.33929	0.431803	-0.158315	0.431803	0.0139497
6.7e-06	300	273.944	28.0149	0.130352	0.125579	23.5653	1.33929	0.431797	-0.158138	0.431797	0.0138228
6.8e-06	300	273.83	28.0135	0.130622	0.125988	21.4715	1.33929	0.431788	-0.157895	0.431788	0.0136501
6.9e-06	300	273.674	28.0116	0.130993	0.126547	19.4302	1.33929	0.43178	-0.157673	0.43178	0.0134928
7e-06	300	273.531	28.0098	0.131332	0.127059	17.4527	1.33929	0.431773	-0.157462	0.431773	0.0133448
7.1e-06	300	273.395	28.0082	0.131653	0.127544	15.5123	1.33929	0.431766	-0.157268	0.431766	0.0132084
7.2e-06	300	273.27	28.0066	0.13195	0.127993	13.6207	1.33929	0.43176	-0.157088	0.43176	0.0130834
7.3e-06	300	273.154	28.0052	0.132224	0.128407	11.7766	1.33929	0.431754	-0.156923	0.431754	0.0129692
7.4e-06	300	273.048	28.0039	0.132475	0.128787	9.97886	1.33929	0.431749	-0.156773	0.431749	0.0128655
7.5e-06	300	272.952	28.0027	0.132705	0.129133	8.23733	1.33929	0.431744	-0.156641	0.431744	0.0127744
7.6e-06	300	272.866	28.0017	0.132907	0.129438	6.53389	1.33929	0.43174	-0.15652	0.43174	0.0126919
7.7e-06	300	272.789	28.0008	0.13309	0.129716	4.87331	1.33929	0.431736	-0.156414	0.431736	0.0126191
7.8e-06	300	272.72	27.9999	0.133253	0.129962	3.24921	1.33929	0.431733	-0.156319	0.431733	0.0125546
7.9e-06	300	272.659	27.9992	0.133398	0.13018	1.66601	1.33929	0.431733	-0.156319	0.431733	0.0125546
7.96e-06	300	272.659	27.9992	0.133398	0.13018	1.66601	1.33929	0.43173	-0.156238	0.43173	0.0124995
8e-06	300	272.607	27.9985	0.133521	0.130366	0.122678	1.33929	0.431728	-0.156174	0.431728	0.0124562
8.1e-06	300	272.566	27.998	0.133619	0.130514	-1.37427	1.33929	0.431726	-0.15612	0.431726	0.0124198
8.2e-06	300	272.531	27.9976	0.133701	0.130638	-2.86846	1.33929	0.431724	-0.15608	0.431724	0.0123926
8.3e-06	300	272.506	27.9973	0.133762	0.13073	-4.35101	1.33929	0.431723	-0.156053	0.431723	0.0123746
8.4e-06	300	272.488	27.9971	0.133802	0.130791	-5.82991	1.33929	0.431723	-0.15604	0.431723	0.0123658
8.5e-06	300	272.48	27.997	0.133822	0.130822	-7.30514	1.33929	0.431723	-0.156044	0.431723	0.0123683
8.6e-06	300	272.482	27.997	0.133817	0.130813	-8.77577	1.33929	0.431724	-0.15606	0.431724	0.0123788
8.7e-06	300	272.492	27.9971	0.133793	0.130777	-10.2436	1.33929	0.431725	-0.156089	0.431725	0.0123984
8.8e-06	300	272.511	27.9974	0.133749	0.13071	-11.7078	1.33929	0.431726	-0.156129	0.431726	0.0124259
8.9e-06	300	272.537	27.9977	0.133687	0.130617	-13.1683	1.33929	0.431728	-0.156183	0.431728	0.0124625
9e-06	300	272.572	27.9981	0.133604	0.130492	-14.625	1.33929	0.431731	-0.156254	0.431731	0.0125104
9.1e-06	300	272.617	27.9987	0.133497	0.13033	-16.0771	1.33929	0.431733	-0.156335	0.431733	0.0125652
9.2e-06	300	272.669	27.9993	0.133374	0.130144	-17.5264	1.33929	0.431737	-0.156428	0.431737	0.0126292
9.3e-06	300	272.73	28	0.13323	0.129927	-18.9719	1.33929	0.43174	-0.156536	0.43174	0.0127024
9.4e-06	300	272.799	28.0009	0.133067	0.129681	-20.4137	1.33929	0.431745	-0.156656	0.431745	0.0127849
9.5e-06	300	272.876	28.0018	0.132883	0.129403	-21.8517	1.33929	0.431749	-0.156789	0.431749	0.0128767
9.6e-06	300	272.962	28.0029	0.13268	0.129096	-23.286	1.33929	0.431755	-0.156936	0.431755	0.012978
9.7e-06	300	273.056	28.004	0.132456	0.128758	-24.7164	1.33929	0.43176	-0.157096	0.43176	0.0130887
9.8e-06	300	273.159	28.0053	0.132213	0.12839	-26.1431	1.33929	0.431766	-0.157268	0.431766	0.013209
9.9e-06	300	273.27	28.0066	0.131949	0.127992	-27.566	1.33929	0.431773	-0.157454	0.431773	0.013339
1e-05	300	273.39	28.0081	0.131666	0.127564	-28.9851	1.33929	0.431779	-0.157629	0.431779	0.0134616
1.01e-05	300	273.502	28.0095	0.131399	0.127162	-25.9108	1.33929	0.431784	-0.157785	0.431784	0.0135721
1.02e-05	300	273.603	28.0107	0.131161	0.126801	-22.8408	1.33929	0.431788	-0.157899	0.431788	0.013653
1.03e-05	300	273.677	28.0116	0.130987	0.126538	-18.2829	1.33929	0.431791	-0.157971	0.431791	0.0137041
1.04e-05	300	273.723	28.0122	0.130877	0.126372	-13.7357	1.33929	0.431792	-0.158001	0.431792	0.0137254
1.05e-05	300	273.742	28.0124	0.130831	0.126303	-9.1992	1.33929	0.43179	-0.157951	0.43179	0.0136896
1.06e-05	300	273.71	28.012	0.130908	0.126419	-6.79801	1.33929	0.431786	-0.15782	0.431786	0.0135967
1.07e-05	300	273.625	28.011	0.131108	0.126721	-4.4487	1.33929	0.431781	-0.157697	0.431781	0.0135095
1.08e-05	300	273.546	28.01	0.131296	0.127005	-2.83507	1.33929	0.431777	-0.157566	0.431777	0.0134172
1.09e-05	300	273.462	28.009	0.131496	0.127307	-1.26208	1.33929	0.431772	-0.157447	0.431772	0.0133336
1.1e-05	300	273.385	28.008	0.131677	0.127581	0.261535	1.33929	0.431769	-0.157341	0.431769	0.0132599
1.11e-05	300	273.317	28.0072	0.131838	0.127824	1.76004	1.33929	0.431765	-0.157248	0.431765	0.0131947
1.12e-05	300	273.257	28.0065	0.13198	0.128039	3.24592	1.33929	0.431763	-0.157168	0.431763	0.0131392
1.13e-05	300	273.206	28.0059	0.132102	0.128222	4.72702	1.33929	0.43176	-0.157102	0.43176	0.0130933
1.14e-05	300	273.164	28.0053	0.132202	0.128375	6.2042	1.33929	0.431759	-0.15705	0.431759	0.0130569
1.15e-05	300	273.13	28.0049	0.132282	0.128495	7.67744	1.33929	0.431757	-0.157011	0.431757	0.0130299
1.16e-05	300	273.105	28.0046	0.132342	0.128585	9.14674	1.33929	0.431756	-0.156986	0.431756	0.0130123
1.17e-05	300	273.088	28.0044	0.13238	0.128643	10.6121	1.33929	0.431756	-0.156974	0.431756	0.0130041
1.18e-05	300	273.081	28.0043	0.132399	0.128671	12.0735	1.33929	0.431756	-0.156975	0.431756	0.0130052
1.19e-05	300	273.082	28.0043	0.132396	0.128667	13.5309	1.33929	0.431756	-0.156975	0.431756	0.0130052
1.196e-05	300	273.082	28.0043	0.132396	0.128667	13.5309	1.33929	0.431756	-0.15699	0.431756	0.0130156
1.2e-05	300	273.091	28.0045	0.132373	0.128633	14.9843	1.33929	0.431758	-0.157022	0.431758	0.0130375
1.21e-05	300	273.112	28.0047	0.132325	0.12856	16.4328	1.33929	0.431759	-0.157064	0.431759	0.0130665
1.22e-05	300	273.139	28.005	0.132261	0.128464	17.8783	1.33929	0.431761	-0.157119	0.431761	0.0131047
1.23e-05	300	273.174	28.0055	0.132177	0.128337	19.3198	1.33929	0.431763	-0.157187	0.431763	0.0131522
1.24e-05	300	273.218	28.006	0.132073	0.128179	20.7572	1.33929	0.431766	-0.157269	0.431766	0.0132091
1.25e-05	300	273.271	28.0066	0.131949	0.127991	22.1907	1.33929	0.43177	-0.157367	0.43177	0.0132776
1.26e-05	300	273.334	28.0074	0.131799	0.127766	23.6191	1.33929	0.431774	-0.157476	0.431774	0.0133544
1.27e-05	300	273.404	28.0083	0.131632	0.127513	25.0446	1.33929	0.431778	-0.157599	0.431778	0.0134406
1.28e-05	300	273.483	28.0092	0.131445	0.12723	26.4659	1.33929	0.431783	-0.157733	0.431783	0.0135352
1.29e-05	300	273.57	28.0103	0.13124	0.126921	27.8833	1.33929	0.431788	-0.15788	0.431788	0.0136395
1.3e-05	300	273.664	28.0115	0.131016	0.126582	29.2966	1.33929	0.431793	-0.158041	0.431793	0.0137534
1.31e-05	300	273.767	28.0127	0.130771	0.126212	30.7058	1.33929	0.431799	-0.158214	0.431799	0.0138771
1.32e-05	300	273.879	28.0141	0.130507	0.125813	32.111	1.33929	0.431806	-0.1584	0.431806	0.0140106
1.33e-05	300	273.999	28.0155	0.130223	0.125384	33.5121	1.33929	0.431813	-0.158599	0.431813	0.0141542
1.34e-05	300	274.127	28.0171	0.129919	0.124925	34.9091	1.33929	0.43182	-0.158811	0.43182	0.0143078
1.35e-05	300	274.264	28.0188	0.129595	0.124436	36.3021	1.33929	0.431828	-0.159036	0.431828	0.0144717
1.36e-05	300	274.408	28.0205	0.129252	0.123918	37.6909	1.33929	0.431837	-0.159274	0.431837	0.014646
1.37e-05	300	274.562	28.0224	0.128889	0.12337	39.0757	1.33929	0.431846	-0.159525	0.431846	0.0148307
1.38e-05	300	274.723	28.0244	0.128507	0.122792	40.4563	1.33929	0.431855	-0.159788	0.431855	0.0150261
1.39e-05	300	274.892	28.0265	0.128105	0.122185	41.8329	1.33929	0.431865	-0.160067	0.431865	0.0152347
1.4e-05	300	275.072	28.0287	0.127679	0.121542	43.2043	1.33929	0.431874	-0.16033	0.431874	0.0154322
1.41e-05	300	275.241	28.0307	0.127278	0.120936	40.0859	1.33929	0.431883	-0.160578	0.431883	0.0156197
1.42e-05	300	275.401	28.0327	0.1269	0.120366	36.9712	1.33929	0.43189	-0.160781	0.43189	0.0157745
1.43e-05	300	275.532	28.0343	0.12659	0.119897	32.3704	1.33929	0.431895	-0.160942	0.431895	0.0158976
1.44e-05	300	275.635	28.0355	0.126344	0.119525	27.7811	1.33929	0.4319	-0.161061	0.4319	0.0159887
1.45e-05	300	275.712	28.0365	0.126163	0.119252	23.2032	1.33929	0.431901	-0.161099	0.431901	0.016018
1.46e-05	300	275.736	28.0368	0.126105	0.119164	20.5301	1.33929	0.431895	-0.160925	0.431895	0.0158843
1.47e-05	300	275.624	28.0354	0.126371	0.119565	17.9135	1.33929	0.431889	-0.160759	0.431889	0.0157578
1.48e-05	300	275.518	28.0341	0.126623	0.119947	15.9625	1.33929	0.431881	-0.16054	0.431881	0.0155912
1.49e-05	300	275.377	28.0324	0.126958	0.120452	14.0725	1.33929	0.431874	-0.160341	0.431874	0.0154403
1.5e-05	300	275.248	28.0308	0.127262	0.120912	12.2238	1.33929	0.431868	-0.160153	0.431868	0.0152987
1.51e-05	300	275.127	28.0293	0.127549	0.121345	10.4216	1.33929	0.431862	-0.15998	0.431862	0.0151691
1.52e-05	300	275.016	28.028	0.127813	0.121744	8.6589	1.33929	0.431856	-0.159821	0.431856	0.0150509
1.53e-05	300	274.914	28.0267	0.128054	0.122109	6.94053	1.33929	0.431851	-0.159677	0.431851	0.0149438
1.54e-05	300	274.821	28.0256	0.128274	0.12244	5.2654	1.33929	0.431846	-0.159551	0.431846	0.0148501
1.55e-05	300	274.74	28.0246	0.128467	0.122732	3.63242	1.33929	0.431842	-0.159435	0.431842	0.0147642
1.56e-05	300	274.665	28.0237	0.128644	0.122999	2.04055	1.33929	0.431839	-0.159332	0.431839	0.0146887
1.57e-05	300	274.599	28.0229	0.1288	0.123236	0.488766	1.33929	0.431836	-0.159244	0.431836	0.0146235
1.58e-05	300	274.542	28.0222	0.128936	0.12344	-1.01425	1.33929	0.431833	-0.159168	0.431833	0.0145683
1.59e-05	300	274.493	28.0216	0.12905	0.123613	-2.50559	1.33929	0.431833	-0.159168	0.431833	0.0145683
1.596e-05	300	274.493	28.0216	0.12905	0.123613	-2.50559	1.33929	0.431831	-0.159107	0.431831	0.0145232
1.6e-05	300	274.454	28.0211	0.129144	0.123755	-3.98463	1.33929	0.431829	-0.159062	0.431829	0.0144906
1.61e-05	300	274.425	28.0208	0.129212	0.123858	-5.46252	1.33929	0.431828	-0.159028	0.431828	0.0144654
1.62e-05	300	274.403	28.0205	0.129265	0.123938	-6.93766	1.33929	0.431827	-0.159007	0.431827	0.0144501
1.63e-05	300	274.389	28.0203	0.129297	0.123986	-8.40913	1.33929	0.431827	-0.158999	0.431827	0.0144446
1.64e-05	300	274.385	28.0203	0.129309	0.124003	-9.87691	1.33929	0.431827	-0.159005	0.431827	0.0144489
1.65e-05	300	274.388	28.0203	0.129299	0.123989	-11.341	1.33929	0.431828	-0.159028	0.431828	0.0144655
1.66e-05	300	274.403	28.0205	0.129265	0.123937	-12.8005	1.33929	0.431829	-0.159062	0.431829	0.0144906
1.67e-05	300	274.425	28.0208	0.129212	0.123858	-14.2571	1.33929	0.431831	-0.15911	0.431831	0.0145255
1.68e-05	300	274.456	28.0211	0.12914	0.123748	-15.7101	1.33929	0.431833	-0.159169	0.431833	0.014569
1.69e-05	300	274.494	28.0216	0.129049	0.123611	-17.1593	1.33929	0.431836	-0.159242	0.431836	0.0146223
1.7e-05	300	274.541	28.0222	0.128938	0.123444	-18.6048	1.33929	0.431839	-0.159328	0.431839	0.0146854
1.71e-05	300	274.596	28.0228	0.128807	0.123246	-20.0466	1.33929	0.431842	-0.159427	0.431842	0.0147584
1.72e-05	300	274.66	28.0236	0.128656	0.123018	-21.4846	1.33929	0.431846	-0.159539	0.431846	0.0148414
1.73e-05	300	274.732	28.0245	0.128485	0.122759	-22.9188	1.33929	0.43185	-0.159665	0.43185	0.0149343
1.74e-05	300	274.813	28.0255	0.128293	0.12247	-24.3492	1.33929	0.431855	-0.159806	0.431855	0.0150397
1.75e-05	300	274.904	28.0266	0.128077	0.122143	-25.7749	1.33929	0.431861	-0.159958	0.431861	0.0151529
1.76e-05	300	275.002	28.0278	0.127846	0.121794	-27.1973	1.33929	0.431867	-0.160123	0.431867	0.0152762
1.77e-05	300	275.108	28.0291	0.127595	0.121414	-28.6159	1.33929	0.431873	-0.1603	0.431873	0.0154099
1.78e-05	300	275.222	28.0305	0.127324	0.121005	-30.0312	1.33929	0.43188	-0.160491	0.43188	0.0155539
1.79e-05	300	275.345	28.032	0.127033	0.120565	-31.4427	1.33929	0.431887	-0.160695	0.431887	0.0157086
1.8e-05	300	275.476	28.0336	0.126722	0.120096	-32.8503	1.33929	0.431893	-0.160887	0.431893	0.0158551
1.81e-05	300	275.6	28.0351	0.126429	0.119653	-29.765	1.33929	0.4319	-0.161061	0.4319	0.0159886
1.82e-05	300	275.712	28.0365	0.126163	0.119252	-26.6841	1.33929	0.431904	-0.161193	0.431904	0.0160899
1.83e-05	300	275.797	28.0375	0.125962	0.118948	-22.1153	1.33929	0.431907	-0.161282	0.431907	0.0161589
1.84e-05	300	275.854	28.0382	0.125826	0.118742	-17.5572	1.33929	0.431909	-0.16133	0.431909	0.0161955
1.85e-05	300	275.885	28.0386	0.125753	0.118633	-13.0099	1.33929	0.431908	-0.161297	0.431908	0.01617
1.86e-05	300	275.863	28.0383	0.125804	0.118709	-10.5354	1.33929	0.431903	-0.161157	0.431903	0.0160624
1.87e-05	300	275.774	28.0372	0.126017	0.119031	-8.11399	1.33929	0.431898	-0.161025	0.431898	0.0159611
1.88e-05	300	275.689	28.0362	0.126218	0.119334	-6.40935	1.33929	0.431893	-0.160874	0.431893	0.0158452
1.89e-05	300	275.591	28.035	0.126449	0.119683	-4.74762	1.33929	0.431888	-0.16074	0.431888	0.0157432
1.9e-05	300	275.505	28.034	0.126653	0.119991	-3.12772	1.33929	0.431884	-0.160619	0.431884	0.0156507
1.91e-05	300	275.427	28.033	0.126838	0.120272	-1.54862	1.33929	0.43188	-0.160511	0.43188	0.0155688
1.92e-05	300	275.357	28.0321	0.127003	0.12052	-0.00929705	1.33929	0.431877	-0.160415	0.431877	0.0154962
1.93e-05	300	275.296	28.0314	0.127149	0.120741	1.48544	1.33929	0.431874	-0.160332	0.431874	0.015434
1.94e-05	300	275.243	28.0307	0.127275	0.120931	2.97723	1.33929	0.431872	-0.160264	0.431872	0.0153821
1.95e-05	300	275.198	28.0302	0.12738	0.12109	4.45778	1.33929	0.43187	-0.160208	0.43187	0.0153406
1.96e-05	300	275.163	28.0298	0.127464	0.121217	5.9344	1.33929	0.431868	-0.160167	0.431868	0.0153092
1.97e-05	300	275.136	28.0294	0.127527	0.121313	7.4071	1.33929	0.431867	-0.160139	0.431867	0.0152881
1.98e-05	300	275.118	28.0292	0.127571	0.121378	8.87586	1.33929	0.431867	-0.160124	0.431867	0.015277
1.99e-05	300	275.108	28.0291	0.127593	0.121412	10.3407	1.33929	0.431867	-0.160124	0.431867	0.015277
1.996e-05	300	275.108	28.0291	0.127593	0.121412	10.3407	1.33929	0.431867	-0.160123	0.431867	0.015276
2e-05	300	275.108	28.0291	0.127595	0.121415	11.8015	1.33929	0.431867	-0.160138	0.431867	0.0152876
2.01e-05	300	275.118	28.0292	0.127571	0.121379	13.2574	1.33929	0.431868	-0.160163	0.431868	0.0153067
2.02e-05	300	275.134	28.0294	0.127533	0.121321	14.7104	1.33929	0.431869	-0.160202	0.431869	0.0153358
2.03e-05	300	275.159	28.0297	0.127474	0.121231	16.1593	1.33929	0.431871	-0.160254	0.431871	0.0153749
2.04e-05	300	275.192	28.0301	0.127394	0.121112	17.6043	1.33929	0.431874	-0.160319	0.431874	0.0154241
2.05e-05	300	275.234	28.0306	0.127295	0.120961	19.0453	1.33929	0.431876	-0.160401	0.431876	0.0154859
2.06e-05	300	275.287	28.0313	0.12717	0.120773	20.4812	1.33929	0.43188	-0.160494	0.43188	0.0155565
2.07e-05	300	275.347	28.032	0.127028	0.120558	21.9142	1.33929	0.431883	-0.160601	0.431883	0.0156372
2.08e-05	300	275.416	28.0329	0.126865	0.120312	23.3431	1.33929	0.431888	-0.160719	0.431888	0.0157269
2.09e-05	300	275.491	28.0338	0.126685	0.120041	24.7681	1.33929	0.431892	-0.16085	0.431892	0.0158268
2.1e-05	300	275.576	28.0348	0.126485	0.119739	26.189	1.33929	0.431897	-0.160994	0.431897	0.015937
2.11e-05	300	275.668	28.0359	0.126266	0.119407	27.6058	1.33929	0.431903	-0.161151	0.431903	0.0160577
2.12e-05	300	275.77	28.0372	0.126026	0.119045	29.0187	1.33929	0.431909	-0.161321	0.431909	0.0161888
2.13e-05	300	275.879	28.0385	0.125767	0.118653	30.4274	1.33929	0.431915	-0.161507	0.431915	0.016333
2.14e-05	300	275.999	28.04	0.125483	0.118224	31.8311	1.33929	0.431922	-0.161703	0.431922	0.0164853
2.15e-05	300	276.125	28.0415	0.125184	0.117773	33.2318	1.33929	0.43193	-0.161912	0.43193	0.0166485
2.16e-05	300	276.259	28.0432	0.124865	0.117292	34.6283	1.33929	0.431937	-0.162133	0.431937	0.0168226
2.17e-05	300	276.402	28.0449	0.124527	0.116781	36.0208	1.33929	0.431946	-0.162368	0.431946	0.0170077
2.18e-05	300	276.553	28.0468	0.12417	0.116241	37.4093	1.33929	0.431954	-0.162615	0.431954	0.017204
2.19e-05	300	276.712	28.0487	0.123793	0.115671	38.7936	1.33929	0.431963	-0.162875	0.431963	0.0174116
2.2e-05	300	276.879	28.0507	0.123396	0.115072	40.1738	1.33929	0.431972	-0.163123	0.431972	0.017611
2.21e-05	300	277.039	28.0527	0.123018	0.114501	37.0623	1.33929	0.43198	-0.163353	0.43198	0.0177968
2.22e-05	300	277.187	28.0545	0.122667	0.113971	33.9555	1.33929	0.431987	-0.16354	0.431987	0.0179489
2.23e-05	300	277.308	28.056	0.122381	0.113539	29.362	1.33929	0.431992	-0.163685	0.431992	0.0180671
2.24e-05	300	277.401	28.0571	0.12216	0.113205	24.78	1.33929	0.431995	-0.163777	0.431995	0.0181422
2.25e-05	300	277.46	28.0578	0.12202	0.112993	20.2124	1.33929	0.431996	-0.163805	0.431996	0.0181646
2.26e-05	300	277.478	28.0581	0.121978	0.11293	17.5964	1.33929	0.431995	-0.163762	0.431995	0.0181298
2.27e-05	300	277.45	28.0577	0.122043	0.113028	15.0387	1.33929	0.43199	-0.163631	0.43199	0.0180227
2.28e-05	300	277.366	28.0567	0.122243	0.11333	13.1608	1.33929	0.431987	-0.163533	0.431987	0.0179431
2.29e-05	300	277.303	28.0559	0.122392	0.113555	11.3301	1.33929	0.431983	-0.163424	0.431983	0.0178544
2.3e-05	300	277.233	28.0551	0.122559	0.113807	9.54541	1.33929	0.431979	-0.163327	0.431979	0.0177756
2.31e-05	300	277.17	28.0543	0.122707	0.114031	7.8056	1.33929	0.431976	-0.163243	0.431976	0.017708
2.32e-05	300	277.116	28.0536	0.122834	0.114224	6.10955	1.33929	0.431974	-0.163173	0.431974	0.0176514
2.33e-05	300	277.071	28.0531	0.122941	0.114385	4.45617	1.33929	0.431972	-0.163117	0.431972	0.0176058
2.34e-05	300	277.035	28.0526	0.123028	0.114515	2.84441	1.33929	0.43197	-0.163074	0.43197	0.0175712
2.35e-05	300	277.007	28.0523	0.123093	0.114615	1.27322	1.33929	0.431969	-0.163044	0.431969	0.0175474
2.36e-05	300	276.988	28.0521	0.123138	0.114683	-0.248699	1.33929	0.431969	-0.163028	0.431969	0.0175345
2.37e-05	300	276.978	28.0519	0.123163	0.11472	-1.74553	1.33929	0.431969	-0.163025	0.431969	0.0175323
2.38e-05	300	276.976	28.0519	0.123167	0.114726	-3.22996	1.33929	0.431969	-0.163036	0.431969	0.0175409
2.39e-05	300	276.983	28.052	0.123151	0.114701	-4.70977	1.33929	0.431969	-0.163036	0.431969	0.0175409
2.396e-05	300	276.983	28.052	0.123151	0.114701	-4.70977	1.33929	0.43197	-0.16306	0.43197	0.0175602
2.4e-05	300	276.998	28.0522	0.123114	0.114646	-6.18593	1.33929	0.431971	-0.163101	0.431971	0.017593
2.41e-05	300	277.025	28.0525	0.123052	0.114552	-7.6575	1.33929	0.431973	-0.163151	0.431973	0.0176338
2.42e-05	300	277.057	28.0529	0.122975	0.114436	-9.12631	1.33929	0.431975	-0.163215	0.431975	0.0176853
2.43e-05	300	277.098	28.0534	0.122877	0.114288	-10.5914	1.33929	0.431978	-0.163292	0.431978	0.0177477
2.44e-05	300	277.148	28.054	0.12276	0.114111	-12.0529	1.33929	0.431981	-0.163383	0.431981	0.0178208
2.45e-05	300	277.206	28.0547	0.122622	0.113903	-13.5106	1.33929	0.431985	-0.163489	0.431985	0.0179074
2.46e-05	300	277.275	28.0556	0.122459	0.113657	-14.9637	1.33929	0.431989	-0.163606	0.431989	0.0180023
2.47e-05	300	277.35	28.0565	0.122281	0.113388	-16.414	1.33929	0.431994	-0.163735	0.431994	0.0181081
2.48e-05	300	277.433	28.0575	0.122083	0.113089	-17.8605	1.33929	0.431999	-0.163878	0.431999	0.0182249
2.49e-05	300	277.525	28.0586	0.121866	0.11276	-19.3034	1.33929	0.432004	-0.164034	0.432004	0.0183528
2.5e-05	300	277.625	28.0599	0.121628	0.112401	-20.7424	1.33929	0.43201	-0.164203	0.43201	0.0184919
2.51e-05	300	277.734	28.0612	0.121371	0.112013	-22.1777	1.33929	0.432016	-0.164384	0.432016	0.0186422
2.52e-05	300	277.851	28.0626	0.121093	0.111594	-23.6093	1.33929	0.432023	-0.164579	0.432023	0.0188039
2.53e-05	300	277.976	28.0642	0.120796	0.111145	-25.0371	1.33929	0.432031	-0.164787	0.432031	0.0189772
2.54e-05	300	278.11	28.0658	0.12048	0.110667	-26.461	1.33929	0.432038	-0.165007	0.432038	0.019162
2.55e-05	300	278.252	28.0675	0.120144	0.110159	-27.8812	1.33929	0.432047	-0.16524	0.432047	0.0193585
2.56e-05	300	278.402	28.0694	0.119788	0.109622	-29.2976	1.33929	0.432055	-0.165486	0.432055	0.019567
2.57e-05	300	278.56	28.0713	0.119413	0.109055	-30.7102	1.33929	0.432064	-0.165748	0.432064	0.0197901
2.58e-05	300	278.729	28.0734	0.119013	0.108451	-32.118	1.33929	0.432074	-0.16602	0.432074	0.0200228
2.59e-05	300	278.904	28.0755	0.118599	0.107825	-33.523	1.33929	0.432084	-0.166304	0.432084	0.0202677
2.6e-05	300	279.086	28.0777	0.118165	0.10717	-34.9241	1.33929	0.432094	-0.166576	0.432094	0.0205039
2.61e-05	300	279.262	28.0799	0.11775	0.106543	-31.8325	1.33929	0.432103	-0.166831	0.432103	0.0207256
2.62e-05	300	279.425	28.0819	0.117362	0.105957	-28.7453	1.33929	0.43211	-0.167042	0.43211	0.020911
2.63e-05	300	279.562	28.0835	0.117039	0.105469	-24.1704	1.33929	0.432116	-0.167211	0.432116	0.0210598
2.64e-05	300	279.671	28.0849	0.116781	0.10508	-19.6061	1.33929	0.43212	-0.167338	0.43212	0.0211716
2.65e-05	300	279.752	28.0859	0.116588	0.104788	-15.0526	1.33929	0.432112	-0.1671	0.432112	0.0209614
2.66e-05	300	279.599	28.084	0.116951	0.105337	-12.539	1.33929	0.432104	-0.166882	0.432104	0.0207703
2.67e-05	300	279.458	28.0823	0.117284	0.105839	-10.0791	1.33929	0.432093	-0.166561	0.432093	0.0204908
2.68e-05	300	279.252	28.0797	0.117773	0.106578	-8.32606	1.33929	0.432082	-0.166259	0.432082	0.0202287
2.69e-05	300	279.057	28.0774	0.118234	0.107274	-6.6171	1.33929	0.432072	-0.165974	0.432072	0.0199835
2.7e-05	300	278.874	28.0751	0.118668	0.107931	-4.95115	1.33929	0.432063	-0.165706	0.432063	0.0197544
2.71e-05	300	278.702	28.073	0.119077	0.108547	-3.32713	1.33929	0.432054	-0.165456	0.432054	0.019541
2.72e-05	300	278.54	28.071	0.119459	0.109125	-1.74401	1.33929	0.432046	-0.165221	0.432046	0.0193425
2.73e-05	300	278.39	28.0692	0.119817	0.109665	-0.200782	1.33929	0.432038	-0.165003	0.432038	0.0191586
2.74e-05	300	278.249	28.0675	0.12015	0.110169	1.29453	1.33929	0.432031	-0.1648	0.432031	0.0189886
2.75e-05	300	278.119	28.0659	0.120459	0.110636	2.7869	1.33929	0.432025	-0.164613	0.432025	0.0188322
2.76e-05	300	277.998	28.0644	0.120745	0.111067	4.26693	1.33929	0.432018	-0.164441	0.432018	0.0186889
2.77e-05	300	277.887	28.0631	0.121008	0.111464	5.74304	1.33929	0.432013	-0.164283	0.432013	0.0185582
2.78e-05	300	277.786	28.0618	0.121248	0.111828	7.21522	1.33929	0.432008	-0.164143	0.432008	0.0184426
2.79e-05	300	277.695	28.0607	0.121462	0.11215	8.68348	1.33929	0.432008	-0.164143	0.432008	0.0184426
2.796e-05	300	277.695	28.0607	0.121462	0.11215	8.68348	1.33929	0.432004	-0.164015	0.432004	0.0183373
2.8e-05	300	277.613	28.0597	0.121657	0.112445	10.1478	1.33929	0.432	-0.163903	0.432	0.018245
2.81e-05	300	277.541	28.0588	0.121828	0.112704	11.6072	1.33929	0.431996	-0.163802	0.431996	0.0181627
2.82e-05	300	277.476	28.058	0.121981	0.112935	13.0636	1.33929	0.431993	-0.163714	0.431993	0.0180903
2.83e-05	300	277.419	28.0573	0.122117	0.113139	14.516	1.33929	0.43199	-0.163639	0.43199	0.0180291
2.84e-05	300	277.371	28.0568	0.122231	0.113312	15.9645	1.33929	0.431988	-0.163577	0.431988	0.017979
2.85e-05	300	277.331	28.0563	0.122325	0.113454	17.4089	1.33929	0.431987	-0.163533	0.431987	0.0179427
2.86e-05	300	277.303	28.0559	0.122393	0.113557	18.8484	1.33929	0.431985	-0.163498	0.431985	0.0179146
2.87e-05	300	277.28	28.0556	0.122445	0.113636	20.2849	1.33929	0.431985	-0.163477	0.431985	0.0178975
2.88e-05	300	277.267	28.0555	0.122478	0.113685	21.7174	1.33929	0.431984	-0.163473	0.431984	0.0178939
2.89e-05	300	277.264	28.0554	0.122484	0.113695	23.1459	1.33929	0.431985	-0.163478	0.431985	0.0178985
2.9e-05	300	277.268	28.0555	0.122476	0.113682	24.5694	1.33929	0.431985	-0.163497	0.431985	0.0179139
2.91e-05	300	277.28	28.0556	0.122447	0.113638	25.9898	1.33929	0.431986	-0.16353	0.431986	0.0179402
2.92e-05	300	277.301	28.0559	0.122397	0.113564	27.4062	1.33929	0.431988	-0.163575	0.431988	0.0179773
2.93e-05	300	277.33	28.0563	0.122328	0.113459	28.8186	1.33929	0.43199	-0.163634	0.43199	0.0180252
2.94e-05	300	277.368	28.0567	0.122238	0.113323	30.2269	1.33929	0.431993	-0.163706	0.431993	0.0180839
2.95e-05	300	277.414	28.0573	0.122128	0.113157	31.6312	1.33929	0.431996	-0.163791	0.431996	0.0181535
2.96e-05	300	277.469	28.058	0.121999	0.112961	33.0314	1.33929	0.431999	-0.163889	0.431999	0.018234
2.97e-05	300	277.532	28.0587	0.121849	0.112735	34.4275	1.33929	0.432003	-0.164001	0.432003	0.0183254
2.98e-05	300	277.604	28.0596	0.121679	0.112478	35.8196	1.33929	0.432007	-0.164125	0.432007	0.0184278
2.99e-05	300	277.684	28.0606	0.121489	0.112191	37.2076	1.33929	0.432012	-0.164263	0.432012	0.0185413
3e-05	300	277.772	28.0617	0.121279	0.111875	38.5915	1.33929	0.432017	-0.164389	0.432017	0.0186456
3.01e-05	300	277.854	28.0627	0.121087	0.111584	35.4834	1.33929	0.43202	-0.164497	0.43202	0.0187354
3.02e-05	300	277.923	28.0635	0.120922	0.111335	32.3801	1.33929	0.432022	-0.164552	0.432022	0.0187813
3.03e-05	300	277.959	28.0639	0.120838	0.111208	27.7929	1.33929	0.432023	-0.164575	0.432023	0.018801
3.04e-05	300	277.974	28.0641	0.120802	0.111154	23.2143	1.33929	0.432023	-0.164557	0.432023	0.0187856
3.05e-05	300	277.962	28.064	0.12083	0.111196	18.6472	1.33929	0.432017	-0.164389	0.432017	0.0186464
3.06e-05	300	277.854	28.0627	0.121086	0.111582	16.0635	1.33929	0.432011	-0.164241	0.432011	0.0185233
3.07e-05	300	277.758	28.0615	0.121313	0.111925	13.5347	1.33929	0.432005	-0.164059	0.432005	0.0183733
3.08e-05	300	277.641	28.0601	0.12159	0.112344	11.6954	1.33929	0.431999	-0.163892	0.431999	0.018236
3.09e-05	300	277.534	28.0587	0.121845	0.112729	9.90237	1.33929	0.431994	-0.163739	0.431994	0.0181112
3.1e-05	300	277.436	28.0575	0.122078	0.11308	8.15442	1.33929	0.431989	-0.163604	0.431989	0.0180011
3.11e-05	300	277.349	28.0565	0.122283	0.113391	6.45042	1.33929	0.431985	-0.163482	0.431985	0.0179011
3.12e-05	300	277.27	28.0555	0.122471	0.113674	4.7893	1.33929	0.431981	-0.163372	0.431981	0.0178126
3.13e-05	300	277.199	28.0547	0.122637	0.113926	3.16998	1.33929	0.431977	-0.163275	0.431977	0.0177339
3.14e-05	300	277.137	28.0539	0.122786	0.11415	1.59143	1.33929	0.431975	-0.163192	0.431975	0.0176663
3.15e-05	300	277.083	28.0532	0.122913	0.114343	0.0526411	1.33929	0.431972	-0.163122	0.431972	0.0176098
3.16e-05	300	277.038	28.0527	0.12302	0.114504	-1.44104	1.33929	0.43197	-0.163065	0.43197	0.0175643
3.17e-05	300	277.002	28.0522	0.123106	0.114634	-2.93197	1.33929	0.431969	-0.163022	0.431969	0.0175297
3.18e-05	300	276.974	28.0519	0.123172	0.114733	-4.41168	1.33929	0.431968	-0.162992	0.431968	0.017506
3.19e-05	300	276.955	28.0517	0.123217	0.114801	-5.88774	1.33929	0.431968	-0.162992	0.431968	0.017506
3.196e-05	300	276.955	28.0517	0.123217	0.114801	-5.88774	1.33929	0.431967	-0.162976	0.431967	0.0174931
3.2e-05	300	276.945	28.0515	0.123241	0.114838	-7.36013	1.33929	0.431967	-0.162977	0.431967	0.0174936
3.21e-05	300	276.945	28.0515	0.12324	0.114837	-8.82794	1.33929	0.431967	-0.162988	0.431967	0.0175022
3.22e-05	300	276.952	28.0516	0.123224	0.114812	-10.293	1.33929	0.431968	-0.163012	0.431968	0.0175215
3.23e-05	300	276.967	28.0518	0.123187	0.114757	-11.7543	1.33929	0.43197	-0.163049	0.43197	0.0175516
3.24e-05	300	276.991	28.0521	0.12313	0.114671	-13.212	1.33929	0.431971	-0.1631	0.431971	0.0175923
3.25e-05	300	277.024	28.0525	0.123053	0.114554	-14.6659	1.33929	0.431974	-0.163167	0.431974	0.0176465
3.26e-05	300	277.067	28.053	0.122951	0.114399	-16.1152	1.33929	0.431976	-0.163244	0.431976	0.0177088
3.27e-05	300	277.117	28.0537	0.122833	0.114221	-17.5617	1.33929	0.43198	-0.163334	0.43198	0.0177818
3.28e-05	300	277.175	28.0544	0.122695	0.114013	-19.0045	1.33929	0.431983	-0.163438	0.431983	0.0178657
3.29e-05	300	277.242	28.0552	0.122537	0.113775	-20.4435	1.33929	0.431987	-0.163554	0.431987	0.0179605
3.3e-05	300	277.317	28.0561	0.122359	0.113506	-21.8787	1.33929	0.431992	-0.163684	0.431992	0.0180662
3.31e-05	300	277.4	28.0571	0.122162	0.113207	-23.3102	1.33929	0.431997	-0.163827	0.431997	0.0181828
3.32e-05	300	277.492	28.0582	0.121944	0.112879	-24.738	1.33929	0.432002	-0.163983	0.432002	0.0183106
3.33e-05	300	277.592	28.0595	0.121706	0.11252	-26.1619	1.33929	0.432008	-0.164151	0.432008	0.0184496
3.34e-05	300	277.701	28.0608	0.121449	0.112131	-27.5821	1.33929	0.432015	-0.164333	0.432015	0.0185998
3.35e-05	300	277.818	28.0622	0.121172	0.111712	-28.9984	1.33929	0.432022	-0.164528	0.432022	0.0187613
3.36e-05	300	277.943	28.0638	0.120875	0.111263	-30.411	1.33929	0.432029	-0.164735	0.432029	0.0189344
3.37e-05	300	278.077	28.0654	0.120558	0.110785	-31.8197	1.33929	0.432037	-0.164956	0.432037	0.019119
3.38e-05	300	278.219	28.0671	0.120222	0.110277	-33.2246	1.33929	0.432045	-0.165189	0.432045	0.0193154
3.39e-05	300	278.369	28.069	0.119866	0.10974	-34.6257	1.33929	0.432054	-0.165438	0.432054	0.0195263
3.4e-05	300	278.529	28.0709	0.119486	0.109165	-36.022	1.33929	0.432062	-0.165671	0.432062	0.0197243
3.41e-05	300	278.679	28.0727	0.119131	0.108629	-32.9272	1.33929	0.432069	-0.165889	0.432069	0.0199105
3.42e-05	300	278.819	28.0745	0.118798	0.108127	-29.8358	1.33929	0.432076	-0.166063	0.432076	0.0200597
3.43e-05	300	278.931	28.0758	0.118533	0.107726	-25.2572	1.33929	0.43208	-0.166194	0.43208	0.0201728
3.44e-05	300	279.016	28.0769	0.118333	0.107424	-20.6893	1.33929	0.432083	-0.166283	0.432083	0.0202496
3.45e-05	300	279.073	28.0776	0.118197	0.107219	-16.1321	1.33929	0.432076	-0.166063	0.432076	0.0200599
3.46e-05	300	278.931	28.0758	0.118533	0.107726	-13.598	1.33929	0.432069	-0.165863	0.432069	0.0198884
3.47e-05	300	278.803	28.0743	0.118838	0.108186	-11.118	1.33929	0.432058	-0.165579	0.432058	0.0196455
3.48e-05	300	278.62	28.072	0.119272	0.108842	-9.33975	1.33929	0.432049	-0.165311	0.432049	0.0194187
3.49e-05	300	278.448	28.0699	0.119679	0.109458	-7.60621	1.33929	0.43204	-0.165061	0.43204	0.0192074
3.5e-05	300	278.286	28.0679	0.120061	0.110035	-5.91628	1.33929	0.432032	-0.164827	0.432032	0.0190109
3.51e-05	300	278.136	28.0661	0.120418	0.110574	-4.2689	1.33929	0.432024	-0.164609	0.432024	0.0188289
3.52e-05	300	277.995	28.0644	0.120751	0.111076	-2.66299	1.33929	0.432017	-0.164407	0.432017	0.0186607
3.53e-05	300	277.865	28.0628	0.121059	0.111542	-1.09752	1.33929	0.432011	-0.16422	0.432011	0.0185059
3.54e-05	300	277.745	28.0613	0.121345	0.111973	0.418761	1.33929	0.432005	-0.164048	0.432005	0.0183641
3.55e-05	300	277.634	28.06	0.121607	0.11237	1.91271	1.33929	0.431999	-0.16389	0.431999	0.0182348
3.56e-05	300	277.533	28.0587	0.121847	0.112732	3.39407	1.33929	0.431994	-0.163751	0.431994	0.0181206
3.57e-05	300	277.443	28.0576	0.12206	0.113054	4.87156	1.33929	0.43199	-0.163623	0.43199	0.0180165
3.58e-05	300	277.361	28.0566	0.122255	0.113348	6.34513	1.33929	0.431986	-0.16351	0.431986	0.0179239
3.59e-05	300	277.288	28.0557	0.122428	0.11361	7.81477	1.33929	0.431986	-0.16351	0.431986	0.0179239
3.596e-05	300	277.288	28.0557	0.122428	0.11361	7.81477	1.33929	0.431982	-0.163408	0.431982	0.0178412
3.6e-05	300	277.222	28.0549	0.122583	0.113844	9.28047	1.33929	0.431979	-0.163323	0.431979	0.0177725
3.61e-05	300	277.168	28.0543	0.122713	0.11404	10.7412	1.33929	0.431977	-0.163248	0.431977	0.0177121
3.62e-05	300	277.12	28.0537	0.122827	0.114212	12.1991	1.33929	0.431974	-0.163187	0.431974	0.0176627
3.63e-05	300	277.08	28.0532	0.12292	0.114353	13.6529	1.33929	0.431973	-0.163139	0.431973	0.0176243
3.64e-05	300	277.05	28.0528	0.122993	0.114463	15.1028	1.33929	0.431972	-0.163105	0.431972	0.0175968
3.65e-05	300	277.028	28.0526	0.123045	0.114541	16.5487	1.33929	0.431971	-0.163088	0.431971	0.0175828
3.66e-05	300	277.016	28.0524	0.123071	0.114581	17.9897	1.33929	0.431971	-0.163082	0.431971	0.0175782
3.67e-05	300	277.013	28.0524	0.12308	0.114594	19.4271	1.33929	0.431971	-0.16309	0.431971	0.0175845
3.68e-05	300	277.018	28.0524	0.123068	0.114577	20.8605	1.33929	0.431972	-0.163109	0.431972	0.0176001
3.69e-05	300	277.03	28.0526	0.123038	0.114532	22.2905	1.33929	0.431973	-0.163142	0.431973	0.0176264
3.7e-05	300	277.051	28.0528	0.122989	0.114457	23.7164	1.33929	0.431974	-0.163188	0.431974	0.0176634
3.71e-05	300	277.081	28.0532	0.122919	0.114351	25.1383	1.33929	0.431976	-0.163247	0.431976	0.0177112
3.72e-05	300	277.119	28.0537	0.122828	0.114214	26.5562	1.33929	0.431979	-0.16332	0.431979	0.0177698
3.73e-05	300	277.165	28.0542	0.122718	0.114048	27.9701	1.33929	0.431982	-0.163405	0.431982	0.0178391
3.74e-05	300	277.22	28.0549	0.122587	0.113851	29.3799	1.33929	0.431986	-0.163504	0.431986	0.0179192
3.75e-05	300	277.284	28.0557	0.122437	0.113623	30.7856	1.33929	0.431989	-0.163615	0.431989	0.0180101
3.76e-05	300	277.356	28.0566	0.122266	0.113366	32.1874	1.33929	0.431994	-0.16374	0.431994	0.018112
3.77e-05	300	277.436	28.0576	0.122076	0.113078	33.585	1.33929	0.431999	-0.163878	0.431999	0.0182248
3.78e-05	300	277.525	28.0586	0.121866	0.11276	34.9786	1.33929	0.432004	-0.164029	0.432004	0.0183487
3.79e-05	300	277.622	28.0598	0.121636	0.112413	36.3681	1.33929	0.43201	-0.164193	0.43201	0.0184837
3.8e-05	300	277.728	28.0611	0.121386	0.112035	37.7535	1.33929	0.432015	-0.164345	0.432015	0.0186096
3.81e-05	300	277.826	28.0623	0.121153	0.111684	34.6469	1.33929	0.43202	-0.164474	0.43202	0.0187167
3.82e-05	300	277.909	28.0633	0.120957	0.111387	31.5465	1.33929	0.432023	-0.164561	0.432023	0.0187888
3.83e-05	300	277.964	28.064	0.120824	0.111187	26.9593	1.33929	0.432024	-0.164611	0.432024	0.0188302
3.84e-05	300	277.996	28.0644	0.120748	0.111073	22.3821	1.33929	0.432025	-0.164618	0.432025	0.0188365
3.85e-05	300	278.001	28.0645	0.120737	0.111055	17.8164	1.33929	0.432022	-0.164545	0.432022	0.018776
3.86e-05	300	277.955	28.0639	0.120848	0.111223	8.77034	1.33929	0.432018	-0.164425	0.432018	0.0186758
3.87e-05	300	277.877	28.0629	0.121032	0.1115	6.38483	1.33929	0.432014	-0.164314	0.432014	0.0185836
3.88e-05	300	277.805	28.0621	0.121201	0.111757	2.5944	1.33929	0.43201	-0.164202	0.43201	0.018491
3.89e-05	300	277.733	28.0612	0.121372	0.112015	1.03288	1.33929	0.432007	-0.164102	0.432007	0.0184085
3.9e-05	300	277.669	28.0604	0.121525	0.112245	-0.479647	1.33929	0.432004	-0.164015	0.432004	0.0183374
3.91e-05	300	277.613	28.0597	0.121657	0.112445	-1.97115	1.33929	0.432001	-0.163942	0.432001	0.0182775
3.92e-05	300	277.566	28.0591	0.121768	0.112612	-3.45032	1.33929	0.431999	-0.163883	0.431999	0.0182288
3.93e-05	300	277.528	28.0587	0.121858	0.112749	-4.92619	1.33929	0.431997	-0.163837	0.431997	0.0181913
3.94e-05	300	277.499	28.0583	0.121928	0.112855	-6.39841	1.33929	0.431996	-0.163805	0.431996	0.0181648
3.95e-05	300	277.478	28.0581	0.121978	0.112929	-7.86697	1.33929	0.431995	-0.163786	0.431995	0.0181493
3.96e-05	300	277.466	28.0579	0.122006	0.112973	-9.33186	1.33929	0.431995	-0.16378	0.431995	0.0181448
3.97e-05	300	277.462	28.0579	0.122015	0.112986	-10.7931	1.33929	0.431996	-0.163788	0.431996	0.0181512
3.98e-05	300	277.467	28.0579	0.122003	0.112968	-12.2506	1.33929	0.431996	-0.16381	0.431996	0.0181686
3.99e-05	300	277.481	28.0581	0.12197	0.112919	-13.7044	1.33929	0.431996	-0.16381	0.431996	0.0181686
3.996e-05	300	277.481	28.0581	0.12197	0.112919	-13.7044	1.33929	0.431997	-0.163844	0.431997	0.0181969
4e-05	300	277.503	28.0584	0.121918	0.112839	-15.1546	1.33929	0.431999	-0.163895	0.431999	0.0182388
4.01e-05	300	277.536	28.0588	0.12184	0.112721	-16.6	1.33929	0.432001	-0.163956	0.432001	0.0182889
4.02e-05	300	277.575	28.0593	0.121747	0.112581	-18.0427	1.33929	0.432004	-0.16403	0.432004	0.0183499
4.03e-05	300	277.623	28.0598	0.121633	0.112409	-19.4817	1.33929	0.432007	-0.164118	0.432007	0.018422
4.04e-05	300	277.679	28.0605	0.1215	0.112208	-20.9169	1.33929	0.432011	-0.164219	0.432011	0.018505
4.05e-05	300	277.744	28.0613	0.121346	0.111976	-22.3484	1.33929	0.432015	-0.164336	0.432015	0.0186018
4.06e-05	300	277.819	28.0622	0.121168	0.111706	-23.7751	1.33929	0.432019	-0.164462	0.432019	0.018707
4.07e-05	300	277.901	28.0632	0.120974	0.111414	-25.199	1.33929	0.432024	-0.164602	0.432024	0.0188233
4.08e-05	300	277.991	28.0643	0.120761	0.111092	-26.6192	1.33929	0.43203	-0.164755	0.43203	0.0189509
4.09e-05	300	278.09	28.0655	0.120528	0.110739	-28.0356	1.33929	0.432035	-0.164921	0.432035	0.0190899
4.1e-05	300	278.196	28.0668	0.120275	0.110357	-29.4482	1.33929	0.432042	-0.1651	0.432042	0.0192402
4.11e-05	300	278.311	28.0683	0.120002	0.109945	-30.8569	1.33929	0.432048	-0.165292	0.432048	0.0194021
4.12e-05	300	278.435	28.0698	0.119709	0.109503	-32.2619	1.33929	0.432056	-0.165496	0.432056	0.0195757
4.13e-05	300	278.567	28.0714	0.119397	0.109031	-33.6631	1.33929	0.432063	-0.165714	0.432063	0.0197609
4.14e-05	300	278.707	28.0731	0.119065	0.10853	-35.0604	1.33929	0.432071	-0.165944	0.432071	0.0199581
4.15e-05	300	278.855	28.0749	0.118714	0.107999	-36.4539	1.33929	0.43208	-0.166188	0.43208	0.0201672
4.16e-05	300	279.012	28.0768	0.118343	0.107439	-37.8435	1.33929	0.432089	-0.166444	0.432089	0.0203886
4.17e-05	300	279.176	28.0788	0.117952	0.106849	-39.2293	1.33929	0.432098	-0.166712	0.432098	0.0206222
4.18e-05	300	279.349	28.0809	0.117542	0.10623	-40.6112	1.33929	0.432108	-0.166994	0.432108	0.0208683
4.19e-05	300	279.53	28.0831	0.117113	0.105581	-41.9893	1.33929	0.432119	-0.167291	0.432119	0.0211298
4.2e-05	300	279.722	28.0855	0.11666	0.104897	-43.3625	1.33929	0.432129	-0.167571	0.432129	0.0213782
4.21e-05	300	279.902	28.0877	0.116232	0.10425	-40.2457	1.33929	0.432075	-0.16772	0.432075	0.0214333
4.22e-05	300	280.073	28.0898	0.116091	0.104079	-37.1322	1.33929	0.431961	-0.167715	0.431961	0.0212781
4.23e-05	300	280.216	28.0915	0.116267	0.104428	-32.5318	1.33929	0.431869	-0.16771	0.431869	0.0211531
4.24e-05	300	280.331	28.0929	0.11641	0.10471	-27.942	1.33929	0.431799	-0.167706	0.431799	0.0210581
4.25e-05	300	280.418	28.094	0.116519	0.104925	-23.3628	1.33929	0.431924	-0.167713	0.431924	0.0212278
4.26e-05	300	280.262	28.0921	0.116325	0.104542	-20.6903	1.33929	0.432039	-0.167718	0.432039	0.0213837
4.27e-05	300	280.119	28.0903	0.116147	0.104191	-18.0741	1.33929	0.432129	-0.167578	0.432129	0.021384
4.28e-05	300	279.906	28.0877	0.116222	0.104235	-16.1244	1.33929	0.432118	-0.167266	0.432118	0.0211083
4.29e-05	300	279.706	28.0853	0.116697	0.104953	-14.2237	1.33929	0.432108	-0.166973	0.432108	0.02085
4.3e-05	300	279.517	28.083	0.117145	0.105629	-12.3707	1.33929	0.432098	-0.166696	0.432098	0.0206084
4.31e-05	300	279.339	28.0808	0.117566	0.106266	-10.5643	1.33929	0.432089	-0.166437	0.432089	0.020383
4.32e-05	300	279.172	28.0788	0.117962	0.106864	-8.80331	1.33929	0.43208	-0.166194	0.43208	0.0201732
4.33e-05	300	279.016	28.0769	0.118332	0.107423	-7.08664	1.33929	0.432072	-0.165968	0.432072	0.0199783
4.34e-05	300	278.87	28.0751	0.118678	0.107945	-5.41315	1.33929	0.432065	-0.165757	0.432065	0.019798
4.35e-05	300	278.735	28.0734	0.118999	0.10843	-3.7818	1.33929	0.432058	-0.165562	0.432058	0.0196316
4.36e-05	300	278.609	28.0719	0.119297	0.10888	-2.19152	1.33929	0.432052	-0.165382	0.432052	0.0194788
4.37e-05	300	278.493	28.0705	0.119571	0.109294	-0.641299	1.33929	0.432046	-0.165217	0.432046	0.0193391
4.38e-05	300	278.387	28.0692	0.119823	0.109675	0.8601	1.33929	0.43204	-0.165066	0.43204	0.019212
4.39e-05	300	278.29	28.068	0.120053	0.110022	2.34692	1.33929	0.43204	-0.165066	0.43204	0.019212
4.396e-05	300	278.29	28.068	0.120053	0.110022	2.34692	1.33929	0.432036	-0.164933	0.432036	0.0191001
4.4e-05	300	278.204	28.0669	0.120256	0.110329	3.82123	1.33929	0.432032	-0.164812	0.432032	0.0189986
4.41e-05	300	278.126	28.066	0.120441	0.110608	5.29321	1.33929	0.432028	-0.164705	0.432028	0.0189088
4.42e-05	300	278.057	28.0651	0.120605	0.110856	6.76225	1.33929	0.432024	-0.164609	0.432024	0.0188291
4.43e-05	300	277.996	28.0644	0.12075	0.111076	8.22737	1.33929	0.432022	-0.164527	0.432022	0.0187608
4.44e-05	300	277.943	28.0637	0.120876	0.111265	9.68856	1.33929	0.432019	-0.164459	0.432019	0.0187039
4.45e-05	300	277.899	28.0632	0.12098	0.111422	11.1458	1.33929	0.432017	-0.164407	0.432017	0.0186611
4.46e-05	300	277.866	28.0628	0.121059	0.111541	12.5982	1.33929	0.432016	-0.164366	0.432016	0.0186267
4.47e-05	300	277.839	28.0625	0.121122	0.111637	14.0475	1.33929	0.432015	-0.164338	0.432015	0.0186035
4.48e-05	300	277.821	28.0623	0.121165	0.111702	15.4929	1.33929	0.432014	-0.164323	0.432014	0.0185914
4.49e-05	300	277.811	28.0621	0.121187	0.111735	16.9344	1.33929	0.432014	-0.164322	0.432014	0.0185903
4.5e-05	300	277.811	28.0621	0.121189	0.111738	18.3718	1.33929	0.432015	-0.164334	0.432015	0.0186003
4.51e-05	300	277.818	28.0622	0.121171	0.11171	19.8053	1.33929	0.432016	-0.164359	0.432016	0.0186214
4.52e-05	300	277.835	28.0624	0.121132	0.111652	21.2348	1.33929	0.432017	-0.164398	0.432017	0.0186534
4.53e-05	300	277.86	28.0627	0.121073	0.111563	22.6603	1.33929	0.432019	-0.16445	0.432019	0.0186965
4.54e-05	300	277.893	28.0631	0.120994	0.111443	24.0818	1.33929	0.432021	-0.164515	0.432021	0.0187505
4.55e-05	300	277.935	28.0636	0.120894	0.111293	25.4993	1.33929	0.432024	-0.164593	0.432024	0.0188157
4.56e-05	300	277.985	28.0643	0.120775	0.111113	26.9128	1.33929	0.432027	-0.164685	0.432027	0.0188919
4.57e-05	300	278.044	28.065	0.120636	0.110902	28.3222	1.33929	0.432031	-0.164789	0.432031	0.0189792
4.58e-05	300	278.111	28.0658	0.120476	0.110661	29.7276	1.33929	0.432035	-0.164907	0.432035	0.0190777
4.59e-05	300	278.187	28.0667	0.120297	0.110391	31.129	1.33929	0.432039	-0.165037	0.432039	0.0191874
4.6e-05	300	278.271	28.0678	0.120098	0.11009	32.5263	1.33929	0.432044	-0.165156	0.432044	0.0192878
4.61e-05	300	278.348	28.0687	0.119916	0.109815	29.4309	1.33929	0.432047	-0.165258	0.432047	0.0193732
4.62e-05	300	278.413	28.0695	0.119761	0.109582	26.3403	1.33929	0.432049	-0.165317	0.432049	0.0194231
4.63e-05	300	278.451	28.07	0.119671	0.109446	21.7627	1.33929	0.43205	-0.165333	0.43205	0.0194373
4.64e-05	300	278.462	28.0701	0.119646	0.109407	17.1966	1.33929	0.432049	-0.165308	0.432049	0.0194159
4.65e-05	300	278.445	28.0699	0.119684	0.109465	12.642	1.33929	0.432043	-0.165144	0.432043	0.0192771
4.66e-05	300	278.34	28.0686	0.119935	0.109844	10.1768	1.33929	0.432038	-0.164998	0.432038	0.0191547
4.67e-05	300	278.246	28.0675	0.120157	0.110179	7.76458	1.33929	0.432032	-0.164823	0.432032	0.0190075
4.68e-05	300	278.133	28.0661	0.120425	0.110583	6.07414	1.33929	0.432026	-0.164662	0.432026	0.0188732
4.69e-05	300	278.03	28.0648	0.12067	0.110954	4.42624	1.33929	0.432021	-0.164516	0.432021	0.0187512
4.7e-05	300	277.935	28.0637	0.120893	0.111291	2.81981	1.33929	0.432017	-0.164387	0.432017	0.0186442
4.71e-05	300	277.852	28.0626	0.12109	0.111588	1.25382	1.33929	0.432012	-0.16427	0.432012	0.0185473
4.72e-05	300	277.777	28.0617	0.121268	0.111858	-0.263064	1.33929	0.432009	-0.164166	0.432009	0.0184619
4.73e-05	300	277.711	28.0609	0.121426	0.112096	-1.75513	1.33929	0.432006	-0.164075	0.432006	0.0183866
4.74e-05	300	277.652	28.0602	0.121565	0.112307	-3.23485	1.33929	0.432003	-0.163997	0.432003	0.0183225
4.75e-05	300	277.602	28.0596	0.121684	0.112486	-4.71002	1.33929	0.432001	-0.163933	0.432001	0.0182697
4.76e-05	300	277.56	28.0591	0.121782	0.112634	-6.18154	1.33929	0.431999	-0.163882	0.431999	0.018228
4.77e-05	300	277.528	28.0587	0.12186	0.112752	-7.64942	1.33929	0.431998	-0.163845	0.431998	0.0181974
4.78e-05	300	277.503	28.0584	0.121917	0.112837	-9.11363	1.33929	0.431997	-0.163821	0.431997	0.0181779
4.79e-05	300	277.488	28.0582	0.121953	0.112892	-10.5742	1.33929	0.431997	-0.163821	0.431997	0.0181779
4.796e-05	300	277.488	28.0582	0.121953	0.112892	-10.5742	1.33929	0.431996	-0.16381	0.431996	0.0181693
4.8e-05	300	277.481	28.0581	0.121969	0.112917	-12.031	1.33929	0.431997	-0.163817	0.431997	0.0181745
4.81e-05	300	277.485	28.0582	0.121959	0.112902	-13.4833	1.33929	0.431997	-0.163833	0.431997	0.0181878
4.82e-05	300	277.496	28.0583	0.121935	0.112865	-14.9327	1.33929	0.431998	-0.163863	0.431998	0.0182121
4.83e-05	300	277.515	28.0585	0.121889	0.112796	-16.3785	1.33929	0.432	-0.163906	0.432	0.0182473
4.84e-05	300	277.543	28.0589	0.121824	0.112697	-17.8205	1.33929	0.432002	-0.163962	0.432002	0.0182934
4.85e-05	300	277.579	28.0593	0.121738	0.112568	-19.2588	1.33929	0.432004	-0.164034	0.432004	0.0183532
4.86e-05	300	277.626	28.0599	0.121627	0.1124	-20.6924	1.33929	0.432007	-0.164117	0.432007	0.0184212
4.87e-05	300	277.679	28.0605	0.121501	0.11221	-22.1232	1.33929	0.43201	-0.164213	0.43201	0.0185002
4.88e-05	300	277.74	28.0613	0.121355	0.111989	-23.5503	1.33929	0.432014	-0.164322	0.432014	0.0185903
4.89e-05	300	277.811	28.0621	0.121189	0.111738	-24.9736	1.33929	0.432019	-0.164444	0.432019	0.0186914
4.9e-05	300	277.889	28.0631	0.121003	0.111457	-26.3931	1.33929	0.432023	-0.164579	0.432023	0.0188037
4.91e-05	300	277.976	28.0642	0.120797	0.111146	-27.8089	1.33929	0.432029	-0.164727	0.432029	0.0189273
4.92e-05	300	278.071	28.0653	0.120571	0.110805	-29.2208	1.33929	0.432034	-0.164888	0.432034	0.0190621
4.93e-05	300	278.175	28.0666	0.120325	0.110433	-30.629	1.33929	0.43204	-0.165062	0.43204	0.0192083
4.94e-05	300	278.287	28.068	0.12006	0.110032	-32.0334	1.33929	0.432047	-0.165249	0.432047	0.0193661
4.95e-05	300	278.407	28.0694	0.119774	0.109601	-33.4339	1.33929	0.432054	-0.165449	0.432054	0.0195354
4.96e-05	300	278.536	28.071	0.119469	0.109141	-34.8306	1.33929	0.432061	-0.165662	0.432061	0.0197164
4.97e-05	300	278.673	28.0727	0.119145	0.10865	-36.2235	1.33929	0.432069	-0.165888	0.432069	0.0199093
4.98e-05	300	278.818	28.0744	0.1188	0.10813	-37.6126	1.33929	0.432078	-0.166126	0.432078	0.0201142
4.99e-05	300	278.972	28.0763	0.118437	0.107581	-38.9978	1.33929	0.432087	-0.166377	0.432087	0.0203311
5e-05	300	279.134	28.0783	0.118053	0.107002	-40.3792	1.33929	0.432095	-0.166617	0.432095	0.020539
5.01e-05	300	279.288	28.0802	0.117688	0.10645	-37.2686	1.33929	0.432103	-0.166838	0.432103	0.0207322
5.02e-05	300	279.43	28.0819	0.11735	0.10594	-34.1624	1.33929	0.432109	-0.167017	0.432109	0.0208889
5.03e-05	300	279.545	28.0833	0.117077	0.105527	-29.5686	1.33929	0.432114	-0.167153	0.432114	0.0210088
5.04e-05	300	279.633	28.0844	0.116869	0.105213	-24.9855	1.33929	0.432117	-0.167248	0.432117	0.0210917
5.05e-05	300	279.694	28.0851	0.116726	0.104996	-20.4131	1.33929	0.432109	-0.167025	0.432109	0.0208958
5.06e-05	300	279.551	28.0834	0.117065	0.105509	-17.7981	1.33929	0.432102	-0.166823	0.432102	0.0207186
5.07e-05	300	279.42	28.0818	0.117374	0.105975	-15.2386	1.33929	0.432092	-0.166533	0.432092	0.0204664
5.08e-05	300	279.234	28.0795	0.117815	0.106642	-13.361	1.33929	0.432083	-0.166261	0.432083	0.0202307
5.09e-05	300	279.059	28.0774	0.11823	0.107269	-11.5305	1.33929	0.432074	-0.166006	0.432074	0.020011
5.1e-05	300	278.895	28.0754	0.11862	0.107857	-9.74605	1.33929	0.432065	-0.165767	0.432065	0.0198065
5.11e-05	300	278.741	28.0735	0.118984	0.108407	-8.00649	1.33929	0.432057	-0.165545	0.432057	0.0196168
5.12e-05	300	278.598	28.0718	0.119323	0.10892	-6.3107	1.33929	0.43205	-0.165338	0.43205	0.0194414
5.13e-05	300	278.465	28.0701	0.119638	0.109396	-4.65758	1.33929	0.432043	-0.165147	0.432043	0.0192797
5.14e-05	300	278.342	28.0686	0.11993	0.109837	-3.04608	1.33929	0.432037	-0.164971	0.432037	0.0191314
5.15e-05	300	278.228	28.0672	0.120199	0.110243	-1.47517	1.33929	0.432031	-0.164809	0.432031	0.018996
5.16e-05	300	278.124	28.066	0.120446	0.110615	0.0465058	1.33929	0.432026	-0.164662	0.432026	0.018873
5.17e-05	300	278.029	28.0648	0.12067	0.110954	1.53933	1.33929	0.432022	-0.164532	0.432022	0.018765
5.18e-05	300	277.946	28.0638	0.120868	0.111253	3.01958	1.33929	0.432018	-0.164415	0.432018	0.0186672
5.19e-05	300	277.87	28.0629	0.121047	0.111524	4.49381	1.33929	0.432018	-0.164415	0.432018	0.0186672
5.196e-05	300	277.87	28.0629	0.121047	0.111524	4.49381	1.33929	0.432014	-0.16431	0.432014	0.0185809
5.2e-05	300	277.803	28.062	0.121206	0.111764	5.96414	1.33929	0.432011	-0.164222	0.432011	0.0185075
5.21e-05	300	277.746	28.0613	0.121342	0.111969	7.42957	1.33929	0.432008	-0.164143	0.432008	0.0184426
5.22e-05	300	277.696	28.0607	0.121462	0.11215	8.89207	1.33929	0.432006	-0.164078	0.432006	0.018389
5.23e-05	300	277.654	28.0602	0.121561	0.1123	10.3506	1.33929	0.432004	-0.164026	0.432004	0.0183466
5.24e-05	300	277.62	28.0598	0.12164	0.112419	11.8053	1.33929	0.432003	-0.163988	0.432003	0.0183152
5.25e-05	300	277.596	28.0595	0.121698	0.112507	13.2559	1.33929	0.432002	-0.163967	0.432002	0.0182977
5.26e-05	300	277.582	28.0593	0.12173	0.112556	14.7017	1.33929	0.432001	-0.163956	0.432001	0.0182884
5.27e-05	300	277.575	28.0592	0.121747	0.112582	16.1445	1.33929	0.432001	-0.163958	0.432001	0.0182902
5.28e-05	300	277.576	28.0593	0.121744	0.112577	17.5833	1.33929	0.432002	-0.163973	0.432002	0.0183028
5.29e-05	300	277.586	28.0594	0.121721	0.112541	19.0181	1.33929	0.432003	-0.164002	0.432003	0.0183264
5.3e-05	300	277.605	28.0596	0.121677	0.112475	20.4489	1.33929	0.432005	-0.164044	0.432005	0.018361
5.31e-05	300	277.632	28.0599	0.121613	0.112378	21.8758	1.33929	0.432006	-0.164099	0.432006	0.0184064
5.32e-05	300	277.667	28.0604	0.121529	0.112251	23.2987	1.33929	0.432009	-0.164168	0.432009	0.0184629
5.33e-05	300	277.711	28.0609	0.121424	0.112094	24.7175	1.33929	0.432012	-0.164249	0.432012	0.0185302
5.34e-05	300	277.764	28.0616	0.1213	0.111906	26.1324	1.33929	0.432015	-0.164344	0.432015	0.0186086
5.35e-05	300	277.825	28.0623	0.121155	0.111687	27.5432	1.33929	0.432019	-0.164452	0.432019	0.018698
5.36e-05	300	277.894	28.0632	0.120991	0.111439	28.95	1.33929	0.432023	-0.164573	0.432023	0.0187985
5.37e-05	300	277.972	28.0641	0.120806	0.11116	30.3527	1.33929	0.432028	-0.164706	0.432028	0.0189102
5.38e-05	300	278.058	28.0652	0.120602	0.110852	31.7515	1.33929	0.432033	-0.164853	0.432033	0.0190331
5.39e-05	300	278.153	28.0663	0.120378	0.110513	33.1461	1.33929	0.432039	-0.165013	0.432039	0.0191672
5.4e-05	300	278.256	28.0676	0.120134	0.110145	34.5368	1.33929	0.432044	-0.165162	0.432044	0.0192921
5.41e-05	300	278.351	28.0687	0.119908	0.109803	31.4349	1.33929	0.432048	-0.165292	0.432048	0.0194023
5.42e-05	300	278.435	28.0698	0.119709	0.109503	28.3379	1.33929	0.432052	-0.16538	0.432052	0.0194768
5.43e-05	300	278.492	28.0705	0.119575	0.1093	23.7539	1.33929	0.432053	-0.165426	0.432053	0.0195156
5.44e-05	300	278.521	28.0708	0.119505	0.109194	19.1814	1.33929	0.432053	-0.165429	0.432053	0.0195186
5.45e-05	300	278.523	28.0708	0.119499	0.109186	14.6205	1.33929	0.432047	-0.165251	0.432047	0.0193676
5.46e-05	300	278.409	28.0694	0.119772	0.109597	12.1174	1.33929	0.432041	-0.165092	0.432041	0.0192333
5.47e-05	300	278.306	28.0682	0.120014	0.109964	9.66781	1.33929	0.432034	-0.164889	0.432034	0.0190627
5.48e-05	300	278.175	28.0666	0.120324	0.110432	7.9305	1.33929	0.432028	-0.164701	0.432028	0.0189057
5.49e-05	300	278.055	28.0651	0.12061	0.110864	6.23688	1.33929	0.432022	-0.164528	0.432022	0.0187617
5.5e-05	300	277.944	28.0638	0.120874	0.111262	4.58587	1.33929	0.432016	-0.16437	0.432016	0.0186305
5.51e-05	300	277.842	28.0625	0.121115	0.111626	2.97642	1.33929	0.432011	-0.164227	0.432011	0.0185115
5.52e-05	300	277.749	28.0614	0.121334	0.111958	1.40749	1.33929	0.432006	-0.1641	0.432006	0.0184073
5.53e-05	300	277.668	28.0604	0.121527	0.112249	-0.112281	1.33929	0.432002	-0.163984	0.432002	0.0183118
5.54e-05	300	277.593	28.0595	0.121704	0.112516	-1.60459	1.33929	0.431999	-0.163882	0.431999	0.0182277
5.55e-05	300	277.527	28.0587	0.12186	0.112752	-3.08453	1.33929	0.431996	-0.163793	0.431996	0.018155
5.56e-05	300	277.47	28.058	0.121996	0.112957	-4.55907	1.33929	0.431993	-0.163718	0.431993	0.0180935
5.57e-05	300	277.422	28.0574	0.122111	0.11313	-6.02996	1.33929	0.431991	-0.163656	0.431991	0.0180431
5.58e-05	300	277.382	28.0569	0.122205	0.113272	-7.49721	1.33929	0.431989	-0.163608	0.431989	0.0180038
5.59e-05	300	277.351	28.0565	0.122278	0.113384	-8.96079	1.33929	0.431989	-0.163608	0.431989	0.0180038
5.596e-05	300	277.351	28.0565	0.122278	0.113384	-8.96079	1.33929	0.431988	-0.163573	0.431988	0.0179756
5.6e-05	300	277.329	28.0562	0.122331	0.113463	-10.4207	1.33929	0.431987	-0.163555	0.431987	0.017961
5.61e-05	300	277.317	28.0561	0.122358	0.113505	-11.876	1.33929	0.431987	-0.163547	0.431987	0.0179546
5.62e-05	300	277.312	28.056	0.12237	0.113523	-13.3286	1.33929	0.431987	-0.163553	0.431987	0.0179591
5.63e-05	300	277.316	28.0561	0.122362	0.11351	-14.7774	1.33929	0.431988	-0.163572	0.431988	0.0179745
5.64e-05	300	277.328	28.0562	0.122333	0.113466	-16.2226	1.33929	0.431989	-0.163604	0.431989	0.0180008
5.65e-05	300	277.349	28.0565	0.122284	0.113392	-17.664	1.33929	0.431991	-0.163653	0.431991	0.0180406
5.66e-05	300	277.38	28.0569	0.122209	0.11328	-19.1008	1.33929	0.431993	-0.163712	0.431993	0.0180885
5.67e-05	300	277.418	28.0573	0.12212	0.113144	-20.5347	1.33929	0.431995	-0.163784	0.431995	0.0181474
5.68e-05	300	277.464	28.0579	0.12201	0.112978	-21.9649	1.33929	0.431998	-0.163869	0.431998	0.0182171
5.69e-05	300	277.519	28.0586	0.12188	0.112782	-23.3914	1.33929	0.432002	-0.163967	0.432002	0.0182978
5.7e-05	300	277.582	28.0593	0.12173	0.112556	-24.8141	1.33929	0.432006	-0.164079	0.432006	0.0183895
5.71e-05	300	277.654	28.0602	0.12156	0.112299	-26.2331	1.33929	0.43201	-0.164203	0.43201	0.0184922
5.72e-05	300	277.734	28.0612	0.12137	0.112012	-27.6483	1.33929	0.432015	-0.164341	0.432015	0.0186061
5.73e-05	300	277.823	28.0623	0.12116	0.111694	-29.0596	1.33929	0.43202	-0.164491	0.43202	0.0187311
5.74e-05	300	277.92	28.0635	0.12093	0.111347	-30.4672	1.33929	0.432026	-0.164655	0.432026	0.0188674
5.75e-05	300	278.025	28.0648	0.12068	0.11097	-31.871	1.33929	0.432032	-0.164832	0.432032	0.019015
5.76e-05	300	278.139	28.0661	0.120411	0.110563	-33.271	1.33929	0.432039	-0.165021	0.432039	0.0191741
5.77e-05	300	278.261	28.0676	0.120122	0.110126	-34.6672	1.33929	0.432046	-0.165224	0.432046	0.0193447
5.78e-05	300	278.391	28.0692	0.119813	0.109659	-36.0595	1.33929	0.432054	-0.165439	0.432054	0.0195271
5.79e-05	300	278.53	28.0709	0.119484	0.109163	-37.448	1.33929	0.432062	-0.165667	0.432062	0.0197212
5.8e-05	300	278.677	28.0727	0.119136	0.108637	-38.8327	1.33929	0.432069	-0.165884	0.432069	0.0199063
5.81e-05	300	278.816	28.0744	0.118806	0.108138	-35.7252	1.33929	0.432076	-0.166082	0.432076	0.0200767
5.82e-05	300	278.944	28.076	0.118503	0.107681	-32.6221	1.33929	0.432082	-0.166238	0.432082	0.0202112
5.83e-05	300	279.044	28.0772	0.118265	0.107321	-28.0314	1.33929	0.432086	-0.166352	0.432086	0.0203094
5.84e-05	300	279.117	28.0781	0.118092	0.10706	-23.4514	1.33929	0.432088	-0.166423	0.432088	0.0203712
5.85e-05	300	279.163	28.0787	0.117983	0.106895	-18.882	1.33929	0.432081	-0.166212	0.432081	0.0201883
5.86e-05	300	279.027	28.077	0.118305	0.107382	-16.2972	1.33929	0.432074	-0.166021	0.432074	0.0200234
5.87e-05	300	278.904	28.0755	0.118598	0.107824	-13.7672	1.33929	0.432065	-0.165753	0.432065	0.0197941
5.88e-05	300	278.732	28.0734	0.119006	0.10844	-11.9274	1.33929	0.432056	-0.165502	0.432056	0.0195804
5.89e-05	300	278.57	28.0714	0.119388	0.109018	-10.1338	1.33929	0.432048	-0.165268	0.432048	0.0193817
5.9e-05	300	278.419	28.0696	0.119746	0.109559	-8.38529	1.33929	0.43204	-0.165049	0.43204	0.0191976
5.91e-05	300	278.279	28.0679	0.120079	0.110062	-6.68078	1.33929	0.432033	-0.164847	0.432033	0.0190274
5.92e-05	300	278.148	28.0663	0.120388	0.110529	-5.01917	1.33929	0.432026	-0.164659	0.432026	0.0188708
5.93e-05	300	278.028	28.0648	0.120674	0.11096	-3.39939	1.33929	0.43202	-0.164487	0.43202	0.0187273
5.94e-05	300	277.917	28.0634	0.120937	0.111358	-1.82039	1.33929	0.432015	-0.164329	0.432015	0.0185965
5.95e-05	300	277.815	28.0622	0.121178	0.111721	-0.28118	1.33929	0.43201	-0.164189	0.43201	0.0184808
5.96e-05	300	277.725	28.0611	0.121391	0.112044	1.20946	1.33929	0.432005	-0.164061	0.432005	0.0183754
5.97e-05	300	277.643	28.0601	0.121586	0.112338	2.69167	1.33929	0.432001	-0.163947	0.432001	0.0182816
5.98e-05	300	277.57	28.0592	0.12176	0.112601	4.1614	1.33929	0.431998	-0.163845	0.431998	0.0181978
5.99e-05	300	277.504	28.0584	0.121916	0.112837	5.63178	1.33929	0.431998	-0.163845	0.431998	0.0181978
5.996e-05	300	277.504	28.0584	0.121916	0.112837	5.63178	1.33929	0.431994	-0.163757	0.431994	0.0181253
6e-05	300	277.447	28.0577	0.122051	0.113041	7.09825	1.33929	0.431992	-0.163685	0.431992	0.0180667
6.01e-05	300	277.401	28.0571	0.122161	0.113206	8.55983	1.33929	0.43199	-0.163623	0.43199	0.0180166
6.02e-05	300	277.361	28.0566	0.122254	0.113348	10.0185	1.33929	0.431988	-0.163575	0.431988	0.0179774
6.03e-05	300	277.33	28.0563	0.122328	0.113458	11.4732	1.33929	0.431987	-0.163541	0.431987	0.0179493
6.04e-05	300	277.308	28.056	0.12238	0.113538	12.9239	1.33929	0.431986	-0.16352	0.431986	0.0179322
6.05e-05	300	277.294	28.0558	0.122413	0.113586	14.3707	1.33929	0.431986	-0.163515	0.431986	0.0179286
6.06e-05	300	277.291	28.0558	0.122419	0.113597	15.8126	1.33929	0.431986	-0.163521	0.431986	0.0179332
6.07e-05	300	277.295	28.0558	0.122411	0.113584	17.2515	1.33929	0.431987	-0.16354	0.431987	0.0179486
6.08e-05	300	277.307	28.056	0.122382	0.11354	18.6864	1.33929	0.431988	-0.163572	0.431988	0.0179749
6.09e-05	300	277.328	28.0562	0.122332	0.113465	20.1173	1.33929	0.43199	-0.163618	0.43199	0.018012
6.1e-05	300	277.357	28.0566	0.122263	0.113361	21.5443	1.33929	0.431992	-0.163676	0.431992	0.0180599
6.11e-05	300	277.395	28.0571	0.122173	0.113225	22.9672	1.33929	0.431994	-0.163748	0.431994	0.0181186
6.12e-05	300	277.442	28.0576	0.122064	0.113059	24.3862	1.33929	0.431997	-0.163834	0.431997	0.0181883
6.13e-05	300	277.496	28.0583	0.121934	0.112863	25.8012	1.33929	0.432001	-0.163932	0.432001	0.0182688
6.14e-05	300	277.56	28.0591	0.121784	0.112637	27.2121	1.33929	0.432004	-0.164043	0.432004	0.0183603
6.15e-05	300	277.631	28.0599	0.121614	0.11238	28.619	1.33929	0.432009	-0.164168	0.432009	0.0184628
6.16e-05	300	277.711	28.0609	0.121424	0.112094	30.0219	1.33929	0.432014	-0.164305	0.432014	0.0185764
6.17e-05	300	277.8	28.062	0.121215	0.111777	31.4208	1.33929	0.432019	-0.164455	0.432019	0.0187011
6.18e-05	300	277.897	28.0632	0.120985	0.11143	32.8156	1.33929	0.432025	-0.164619	0.432025	0.018837
6.19e-05	300	278.002	28.0645	0.120736	0.111054	34.2063	1.33929	0.432031	-0.164795	0.432031	0.0189842
6.2e-05	300	278.115	28.0659	0.120467	0.110648	35.593	1.33929	0.432037	-0.16496	0.432037	0.0191222
6.21e-05	300	278.221	28.0671	0.120216	0.110268	32.4874	1.33929	0.432042	-0.165106	0.432042	0.0192456
6.22e-05	300	278.316	28.0683	0.119992	0.10993	29.3866	1.33929	0.432046	-0.165211	0.432046	0.0193336
6.23e-05	300	278.383	28.0691	0.119833	0.10969	24.7988	1.33929	0.432048	-0.165273	0.432048	0.0193861
6.24e-05	300	278.423	28.0696	0.119738	0.109547	20.2226	1.33929	0.432048	-0.165293	0.432048	0.0194028
6.25e-05	300	278.435	28.0698	0.119708	0.109501	15.658	1.33929	0.432046	-0.165232	0.432046	0.0193517
6.26e-05	300	278.397	28.0693	0.1198	0.10964	6.613	1.33929	0.432042	-0.165106	0.432042	0.019245
6.27e-05	300	278.315	28.0683	0.119993	0.109932	4.2718	1.33929	0.432038	-0.164988	0.432038	0.0191464
6.28e-05	300	278.24	28.0674	0.120172	0.110202	0.524977	1.33929	0.432033	-0.164866	0.432033	0.019044
6.29e-05	300	278.161	28.0664	0.120358	0.110483	-0.970115	1.33929	0.43203	-0.164756	0.43203	0.0189518
6.3e-05	300	278.09	28.0655	0.120526	0.110737	-2.45281	1.33929	0.432026	-0.164658	0.432026	0.0188698
6.31e-05	300	278.027	28.0648	0.120676	0.110963	-3.92327	1.33929	0.432023	-0.164573	0.432023	0.0187992
6.32e-05	300	277.972	28.0641	0.120805	0.111158	-5.39324	1.33929	0.432021	-0.164502	0.432021	0.01874
6.33e-05	300	277.927	28.0635	0.120914	0.111322	-6.85957	1.33929	0.432019	-0.164445	0.432019	0.0186922
6.34e-05	300	277.89	28.0631	0.121002	0.111455	-8.32224	1.33929	0.432017	-0.164401	0.432017	0.0186556
6.35e-05	300	277.861	28.0627	0.121069	0.111557	-9.78126	1.33929	0.432016	-0.16437	0.432016	0.0186302
6.36e-05	300	277.842	28.0625	0.121115	0.111627	-11.2366	1.33929	0.432015	-0.164353	0.432015	0.018616
6.37e-05	300	277.83	28.0624	0.121142	0.111667	-12.6883	1.33929	0.432015	-0.164349	0.432015	0.0186128
6.38e-05	300	277.828	28.0623	0.121148	0.111676	-14.1363	1.33929	0.432016	-0.164359	0.432016	0.0186208
6.39e-05	300	277.834	28.0624	0.121133	0.111654	-15.5806	1.33929	0.432016	-0.164359	0.432016	0.0186208
6.396e-05	300	277.834	28.0624	0.121133	0.111654	-15.5806	1.33929	0.432016	-0.164381	0.432016	0.0186397
6.4e-05	300	277.849	28.0626	0.121098	0.111601	-17.0212	1.33929	0.432018	-0.164421	0.432018	0.0186725
6.41e-05	300	277.874	28.0629	0.121038	0.11151	-18.4571	1.33929	0.43202	-0.16447	0.43202	0.0187136
6.42e-05	300	277.906	28.0633	0.120962	0.111396	-19.8902	1.33929	0.432022	-0.164533	0.432022	0.0187657
6.43e-05	300	277.947	28.0638	0.120867	0.111251	-21.3197	1.33929	0.432024	-0.164609	0.432024	0.0188289
6.44e-05	300	277.995	28.0644	0.120751	0.111076	-22.7453	1.33929	0.432028	-0.164698	0.432028	0.0189033
6.45e-05	300	278.053	28.0651	0.120615	0.110871	-24.1673	1.33929	0.432031	-0.164804	0.432031	0.0189915
6.46e-05	300	278.121	28.0659	0.120454	0.110628	-25.5845	1.33929	0.432035	-0.164919	0.432035	0.0190881
6.47e-05	300	278.195	28.0668	0.120278	0.110362	-26.9989	1.33929	0.43204	-0.165047	0.43204	0.019196
6.48e-05	300	278.278	28.0678	0.120082	0.110066	-28.4095	1.33929	0.432045	-0.165189	0.432045	0.0193152
6.49e-05	300	278.369	28.069	0.119866	0.10974	-29.8164	1.33929	0.43205	-0.165343	0.43205	0.0194458
6.5e-05	300	278.468	28.0702	0.11963	0.109384	-31.2194	1.33929	0.432056	-0.165511	0.432056	0.0195879
6.51e-05	300	278.576	28.0715	0.119375	0.108998	-32.6187	1.33929	0.432062	-0.165691	0.432062	0.0197415
6.52e-05	300	278.692	28.0729	0.1191	0.108582	-34.0141	1.33929	0.432069	-0.165885	0.432069	0.0199069
6.53e-05	300	278.817	28.0744	0.118805	0.108137	-35.4057	1.33929	0.432077	-0.166091	0.432077	0.0200839
6.54e-05	300	278.949	28.076	0.11849	0.107662	-36.7935	1.33929	0.432084	-0.16631	0.432084	0.0202729
6.55e-05	300	279.09	28.0778	0.118156	0.107157	-38.1775	1.33929	0.432092	-0.166542	0.432092	0.0204739
6.56e-05	300	279.24	28.0796	0.117802	0.106622	-39.5576	1.33929	0.432101	-0.166787	0.432101	0.0206871
6.57e-05	300	279.397	28.0815	0.117429	0.106058	-40.9339	1.33929	0.43211	-0.167044	0.43211	0.0209125
6.58e-05	300	279.563	28.0835	0.117036	0.105465	-42.3064	1.33929	0.43212	-0.167314	0.43212	0.0211505
6.59e-05	300	279.737	28.0857	0.116624	0.104843	-43.6749	1.33929	0.432129	-0.167597	0.432129	0.021401
6.6e-05	300	279.919	28.0879	0.116193	0.104191	-45.0396	1.33929	0.432059	-0.167719	0.432059	0.0214115
6.61e-05	300	280.093	28.09	0.116116	0.104128	-41.913	1.33929	0.431929	-0.167713	0.431929	0.0212343
6.62e-05	300	280.256	28.092	0.116317	0.104527	-38.7907	1.33929	0.43182	-0.167707	0.43182	0.0210876
6.63e-05	300	280.391	28.0937	0.116485	0.104859	-34.1811	1.33929	0.431734	-0.167703	0.431734	0.0209709
6.64e-05	300	280.499	28.095	0.116619	0.105123	-29.5821	1.33929	0.431669	-0.1677	0.431669	0.0208839
6.65e-05	300	280.58	28.096	0.116719	0.105321	-24.9938	1.33929	0.431792	-0.167706	0.431792	0.0210492
6.66e-05	300	280.427	28.0941	0.116529	0.104945	-22.2921	1.33929	0.431904	-0.167712	0.431904	0.0212007
6.67e-05	300	280.287	28.0924	0.116356	0.104603	-19.6473	1.33929	0.432069	-0.16772	0.432069	0.0214244
6.68e-05	300	280.081	28.0899	0.116101	0.104099	-17.663	1.33929	0.432128	-0.167548	0.432128	0.0213579
6.69e-05	300	279.888	28.0875	0.116267	0.104303	-15.7285	1.33929	0.432118	-0.167265	0.432118	0.0211069
6.7e-05	300	279.705	28.0853	0.116699	0.104956	-13.8426	1.33929	0.432108	-0.166998	0.432108	0.0208725
6.71e-05	300	279.533	28.0832	0.117106	0.10557	-12.0041	1.33929	0.4321	-0.166749	0.4321	0.020654
6.72e-05	300	279.373	28.0812	0.117487	0.106146	-10.2119	1.33929	0.432091	-0.166515	0.432091	0.0204509
6.73e-05	300	279.222	28.0794	0.117843	0.106683	-8.46469	1.33929	0.432084	-0.166298	0.432084	0.0202626
6.74e-05	300	279.083	28.0777	0.118174	0.107184	-6.76144	1.33929	0.432077	-0.166096	0.432077	0.0200886
6.75e-05	300	278.953	28.0761	0.118482	0.107649	-5.10106	1.33929	0.43207	-0.16591	0.43207	0.0199285
6.76e-05	300	278.833	28.0746	0.118766	0.108079	-3.48247	1.33929	0.432064	-0.165738	0.432064	0.0197818
6.77e-05	300	278.722	28.0733	0.119028	0.108474	-1.90464	1.33929	0.432059	-0.165582	0.432059	0.0196481
6.78e-05	300	278.621	28.072	0.119267	0.108835	-0.366564	1.33929	0.432054	-0.165442	0.432054	0.0195298
6.79e-05	300	278.532	28.0709	0.119479	0.109156	1.123	1.33929	0.432054	-0.165442	0.432054	0.0195298
6.796e-05	300	278.532	28.0709	0.119479	0.109156	1.123	1.33929	0.432049	-0.165315	0.432049	0.0194221
6.8e-05	300	278.45	28.0699	0.119673	0.109448	2.60264	1.33929	0.432045	-0.165204	0.432045	0.0193278
6.81e-05	300	278.378	28.0691	0.119843	0.109706	4.06933	1.33929	0.432042	-0.165104	0.432042	0.0192437
6.82e-05	300	278.314	28.0683	0.119996	0.109935	5.53617	1.33929	0.432039	-0.165016	0.432039	0.0191698
6.83e-05	300	278.258	28.0676	0.12013	0.110138	6.9996	1.33929	0.432036	-0.164942	0.432036	0.0191073
6.84e-05	300	278.21	28.067	0.120243	0.110309	8.45913	1.33929	0.432034	-0.164881	0.432034	0.0190563
6.85e-05	300	278.171	28.0665	0.120336	0.110449	9.91474	1.33929	0.432032	-0.164837	0.432032	0.0190195
6.86e-05	300	278.142	28.0662	0.120403	0.11055	11.3654	1.33929	0.432031	-0.164803	0.432031	0.0189912
6.87e-05	300	278.121	28.0659	0.120454	0.110629	12.8132	1.33929	0.432031	-0.164783	0.432031	0.0189741
6.88e-05	300	278.107	28.0658	0.120486	0.110676	14.257	1.33929	0.43203	-0.164776	0.43203	0.0189681
6.89e-05	300	278.103	28.0657	0.120496	0.110692	15.6969	1.33929	0.43203	-0.164782	0.43203	0.0189734
6.9e-05	300	278.107	28.0658	0.120487	0.110677	17.1328	1.33929	0.432031	-0.164802	0.432031	0.0189898
6.91e-05	300	278.119	28.0659	0.120457	0.110632	18.5648	1.33929	0.432032	-0.164835	0.432032	0.0190173
6.92e-05	300	278.141	28.0662	0.120407	0.110557	19.9927	1.33929	0.432034	-0.164881	0.432034	0.0190559
6.93e-05	300	278.17	28.0665	0.120336	0.11045	21.4168	1.33929	0.432036	-0.16494	0.432036	0.0191057
6.94e-05	300	278.208	28.067	0.120246	0.110314	22.8368	1.33929	0.432039	-0.165012	0.432039	0.0191666
6.95e-05	300	278.255	28.0676	0.120135	0.110147	24.2528	1.33929	0.432042	-0.165098	0.432042	0.0192387
6.96e-05	300	278.31	28.0682	0.120005	0.109949	25.6649	1.33929	0.432045	-0.165197	0.432045	0.019322
6.97e-05	300	278.374	28.069	0.119854	0.109722	27.0729	1.33929	0.432049	-0.165309	0.432049	0.0194165
6.98e-05	300	278.446	28.0699	0.119683	0.109464	28.4769	1.33929	0.432053	-0.165434	0.432053	0.0195223
6.99e-05	300	278.526	28.0709	0.119493	0.109176	29.8769	1.33929	0.432058	-0.165572	0.432058	0.0196395
7e-05	300	278.615	28.072	0.119282	0.108858	31.2729	1.33929	0.432063	-0.165698	0.432063	0.0197472
7.01e-05	300	278.696	28.073	0.11909	0.108567	28.176	1.33929	0.432067	-0.165806	0.432067	0.0198399
7.02e-05	300	278.766	28.0738	0.118924	0.108317	25.0839	1.33929	0.432069	-0.165873	0.432069	0.0198966
7.03e-05	300	278.809	28.0743	0.118823	0.108164	20.5048	1.33929	0.43207	-0.165897	0.43207	0.0199171
7.04e-05	300	278.824	28.0745	0.118786	0.108109	15.9372	1.33929	0.432069	-0.165878	0.432069	0.0199016
7.05e-05	300	278.813	28.0744	0.118814	0.108151	11.3811	1.33929	0.432063	-0.165711	0.432063	0.0197581
7.06e-05	300	278.705	28.0731	0.11907	0.108538	8.94285	1.33929	0.432058	-0.165562	0.432058	0.0196312
7.07e-05	300	278.609	28.0719	0.119297	0.108881	6.55709	1.33929	0.432051	-0.165379	0.432051	0.0194763
7.08e-05	300	278.491	28.0704	0.119575	0.109301	4.90185	1.33929	0.432046	-0.165212	0.432046	0.0193347
7.09e-05	300	278.384	28.0691	0.119831	0.109687	3.28827	1.33929	0.43204	-0.165059	0.43204	0.0192057
7.1e-05	300	278.285	28.0679	0.120064	0.110039	1.7153	1.33929	0.432035	-0.164924	0.432035	0.019092
7.11e-05	300	278.198	28.0669	0.120271	0.110351	0.181954	1.33929	0.432031	-0.1648	0.432031	0.0189886
7.12e-05	300	278.119	28.0659	0.120459	0.110635	-1.30413	1.33929	0.432027	-0.164691	0.432027	0.018897
7.13e-05	300	278.048	28.065	0.120626	0.110888	-2.78749	1.33929	0.432024	-0.164593	0.432024	0.0188155
7.14e-05	300	277.985	28.0643	0.120775	0.111113	-4.25889	1.33929	0.432021	-0.164509	0.432021	0.0187455
7.15e-05	300	277.931	28.0636	0.120904	0.111307	-5.72667	1.33929	0.432018	-0.164438	0.432018	0.0186869
7.16e-05	300	277.886	28.063	0.121011	0.11147	-7.19081	1.33929	0.432016	-0.164381	0.432016	0.0186396
7.17e-05	300	277.849	28.0626	0.121098	0.111601	-8.65131	1.33929	0.432015	-0.164338	0.432015	0.0186035
7.18e-05	300	277.821	28.0623	0.121165	0.111702	-10.1081	1.33929	0.432014	-0.164308	0.432014	0.0185786
7.19e-05	300	277.801	28.062	0.121211	0.111771	-11.5613	1.33929	0.432014	-0.164308	0.432014	0.0185786
7.196e-05	300	277.801	28.062	0.121211	0.111771	-11.5613	1.33929	0.432013	-0.164291	0.432013	0.0185648
7.2e-05	300	277.791	28.0619	0.121236	0.111809	-13.0108	1.33929	0.432013	-0.164291	0.432013	0.0185648
7.21e-05	300	277.791	28.0619	0.121236	0.111809	-14.4557	1.33929	0.432014	-0.164301	0.432014	0.0185732
7.22e-05	300	277.797	28.062	0.121221	0.111786	-15.8978	1.33929	0.432014	-0.164324	0.432014	0.0185926
7.23e-05	300	277.812	28.0622	0.121185	0.111732	-17.3362	1.33929	0.432016	-0.164361	0.432016	0.018623
7.24e-05	300	277.836	28.0624	0.121129	0.111647	-18.7709	1.33929	0.432017	-0.164411	0.432017	0.0186645
7.25e-05	300	277.868	28.0628	0.121053	0.111532	-20.2019	1.33929	0.43202	-0.164478	0.43202	0.0187197
7.26e-05	300	277.911	28.0634	0.120951	0.111379	-21.6282	1.33929	0.432022	-0.164554	0.432022	0.0187833
7.27e-05	300	277.96	28.064	0.120834	0.111203	-23.0517	1.33929	0.432026	-0.164644	0.432026	0.0188579
7.28e-05	300	278.018	28.0647	0.120698	0.110996	-24.4714	1.33929	0.432029	-0.164747	0.432029	0.0189437
7.29e-05	300	278.084	28.0655	0.120541	0.110759	-25.8874	1.33929	0.432033	-0.164862	0.432033	0.0190407
7.3e-05	300	278.159	28.0664	0.120364	0.110492	-27.2997	1.33929	0.432038	-0.164991	0.432038	0.0191489
7.31e-05	300	278.242	28.0674	0.120167	0.110195	-28.7081	1.33929	0.432043	-0.165133	0.432043	0.0192684
7.32e-05	300	278.333	28.0685	0.119951	0.109868	-30.1128	1.33929	0.432048	-0.165288	0.432048	0.0193993
7.33e-05	300	278.433	28.0697	0.119714	0.109511	-31.5137	1.33929	0.432054	-0.165456	0.432054	0.0195416
7.34e-05	300	278.541	28.0711	0.119458	0.109124	-32.9108	1.33929	0.432061	-0.165637	0.432061	0.0196955
7.35e-05	300	278.657	28.0725	0.119182	0.108707	-34.3041	1.33929	0.432067	-0.165831	0.432067	0.0198611
7.36e-05	300	278.782	28.074	0.118886	0.10826	-35.6936	1.33929	0.432075	-0.166038	0.432075	0.0200384
7.37e-05	300	278.915	28.0756	0.118571	0.107783	-37.0792	1.33929	0.432082	-0.166258	0.432082	0.0202277
7.38e-05	300	279.057	28.0774	0.118236	0.107277	-38.461	1.33929	0.432091	-0.16649	0.432091	0.0204289
7.39e-05	300	279.206	28.0792	0.117881	0.106742	-39.839	1.33929	0.432099	-0.166735	0.432099	0.0206423
7.4e-05	300	279.364	28.0811	0.117507	0.106177	-41.2132	1.33929	0.432107	-0.166969	0.432107	0.0208465
7.41e-05	300	279.514	28.083	0.117151	0.105639	-38.0955	1.33929	0.432115	-0.167184	0.432115	0.0210358
7.42e-05	300	279.653	28.0846	0.116822	0.105142	-34.9822	1.33929	0.432121	-0.167357	0.432121	0.0211883
7.43e-05	300	279.764	28.086	0.116559	0.104744	-30.3814	1.33929	0.432126	-0.167487	0.432126	0.0213037
7.44e-05	300	279.848	28.087	0.11636	0.104443	-25.7912	1.33929	0.432129	-0.167575	0.432129	0.0213819
7.45e-05	300	279.905	28.0877	0.116225	0.10424	-21.2118	1.33929	0.432121	-0.167356	0.432121	0.0211873
7.46e-05	300	279.763	28.086	0.116561	0.104747	-18.5838	1.33929	0.432114	-0.167156	0.432114	0.0210113
7.47e-05	300	279.635	28.0844	0.116865	0.105206	-16.0115	1.33929	0.432104	-0.166873	0.432104	0.0207623
7.48e-05	300	279.452	28.0822	0.117298	0.10586	-14.1193	1.33929	0.432095	-0.166606	0.432095	0.0205297
7.49e-05	300	279.281	28.0801	0.117704	0.106474	-12.2747	1.33929	0.432086	-0.166356	0.432086	0.020313
7.5e-05	300	279.12	28.0781	0.118085	0.10705	-10.4765	1.33929	0.432078	-0.166123	0.432078	0.0201115
7.51e-05	300	278.97	28.0763	0.118441	0.107588	-8.72347	1.33929	0.43207	-0.165906	0.43207	0.0199248
7.52e-05	300	278.83	28.0746	0.118773	0.108088	-7.01455	1.33929	0.432063	-0.165704	0.432063	0.0197523
7.53e-05	300	278.7	28.073	0.11908	0.108553	-5.34862	1.33929	0.432056	-0.165518	0.432056	0.0195935
7.54e-05	300	278.58	28.0715	0.119365	0.108983	-3.72464	1.33929	0.43205	-0.165346	0.43205	0.0194481
7.55e-05	300	278.47	28.0702	0.119626	0.109378	-2.14154	1.33929	0.432045	-0.165189	0.432045	0.0193155
7.56e-05	300	278.369	28.069	0.119866	0.109739	-0.598322	1.33929	0.43204	-0.16505	0.43204	0.0191982
7.57e-05	300	278.279	28.0679	0.120078	0.11006	0.896286	1.33929	0.432035	-0.164923	0.432035	0.0190915
7.58e-05	300	278.198	28.0669	0.120272	0.110353	2.37698	1.33929	0.432031	-0.16481	0.432031	0.0189965
7.59e-05	300	278.125	28.066	0.120445	0.110614	3.84522	1.33929	0.432031	-0.16481	0.432031	0.0189965
7.596e-05	300	278.125	28.066	0.120445	0.110614	3.84522	1.33929	0.432028	-0.164708	0.432028	0.0189118
7.6e-05	300	278.059	28.0652	0.120599	0.110847	5.3123	1.33929	0.432025	-0.164624	0.432025	0.0188413
7.61e-05	300	278.005	28.0645	0.120728	0.111042	6.77452	1.33929	0.432022	-0.16455	0.432022	0.0187795
7.62e-05	300	277.957	28.0639	0.120841	0.111213	8.2338	1.33929	0.43202	-0.164489	0.43202	0.0187289
7.63e-05	300	277.918	28.0634	0.120934	0.111353	9.68918	1.33929	0.432019	-0.164442	0.432019	0.0186897
7.64e-05	300	277.888	28.0631	0.121006	0.111462	11.1406	1.33929	0.432017	-0.164408	0.432017	0.0186616
7.65e-05	300	277.866	28.0628	0.121058	0.11154	12.5882	1.33929	0.432017	-0.164391	0.432017	0.0186475
7.66e-05	300	277.855	28.0627	0.121084	0.111579	14.0308	1.33929	0.432016	-0.164384	0.432016	0.0186416
7.67e-05	300	277.85	28.0626	0.121094	0.111595	15.4704	1.33929	0.432017	-0.16439	0.432017	0.0186469
7.68e-05	300	277.855	28.0627	0.121085	0.111581	16.9061	1.33929	0.432017	-0.16441	0.432017	0.0186632
7.69e-05	300	277.867	28.0628	0.121055	0.111536	18.3379	1.33929	0.432019	-0.164443	0.432019	0.0186905
7.7e-05	300	277.888	28.0631	0.121005	0.11146	19.7656	1.33929	0.43202	-0.164489	0.43202	0.0187289
7.71e-05	300	277.918	28.0634	0.120934	0.111353	21.1895	1.33929	0.432022	-0.164548	0.432022	0.0187783
7.72e-05	300	277.956	28.0639	0.120843	0.111216	22.6093	1.33929	0.432025	-0.164621	0.432025	0.0188387
7.73e-05	300	278.003	28.0645	0.120733	0.111049	24.0251	1.33929	0.432028	-0.164707	0.432028	0.0189103
7.74e-05	300	278.058	28.0652	0.120602	0.110851	25.437	1.33929	0.432031	-0.164805	0.432031	0.0189929
7.75e-05	300	278.122	28.0659	0.120451	0.110624	26.8448	1.33929	0.432035	-0.164917	0.432035	0.0190867
7.76e-05	300	278.194	28.0668	0.12028	0.110366	28.2486	1.33929	0.43204	-0.165042	0.43204	0.0191917
7.77e-05	300	278.274	28.0678	0.12009	0.110078	29.6485	1.33929	0.432044	-0.16518	0.432044	0.019308
7.78e-05	300	278.363	28.0689	0.119879	0.10976	31.0442	1.33929	0.43205	-0.165331	0.43205	0.0194356
7.79e-05	300	278.46	28.0701	0.119649	0.109412	32.436	1.33929	0.432056	-0.165495	0.432056	0.0195746
7.8e-05	300	278.566	28.0714	0.119399	0.109034	33.8237	1.33929	0.432061	-0.165648	0.432061	0.0197042
7.81e-05	300	278.664	28.0726	0.119166	0.108683	30.7189	1.33929	0.432066	-0.165782	0.432066	0.019819
7.82e-05	300	278.75	28.0736	0.118961	0.108373	27.6189	1.33929	0.432069	-0.165874	0.432069	0.0198977
7.83e-05	300	278.81	28.0743	0.118821	0.108161	23.032	1.33929	0.432071	-0.165924	0.432071	0.0199404
7.84e-05	300	278.842	28.0747	0.118745	0.108047	18.4565	1.33929	0.43207	-0.165893	0.43207	0.0199141
7.85e-05	300	278.822	28.0745	0.118792	0.108117	9.40067	1.33929	0.432065	-0.165752	0.432065	0.0197934
7.86e-05	300	278.731	28.0734	0.119007	0.108442	7.00688	1.33929	0.43206	-0.165619	0.43206	0.0196798
7.87e-05	300	278.646	28.0723	0.11921	0.108749	3.20831	1.33929	0.432055	-0.165465	0.432055	0.0195489
7.88e-05	300	278.546	28.0711	0.119445	0.109104	1.63928	1.33929	0.43205	-0.165329	0.43205	0.0194333
7.89e-05	300	278.459	28.0701	0.119653	0.109418	0.109763	1.33929	0.432045	-0.165204	0.432045	0.0193283
7.9e-05	300	278.379	28.0691	0.119843	0.109704	-1.37379	1.33929	0.432041	-0.165094	0.432041	0.019235
7.91e-05	300	278.308	28.0682	0.120011	0.109959	-2.85462	1.33929	0.432038	-0.164995	0.432038	0.019152
7.92e-05	300	278.244	28.0674	0.120162	0.110186	-4.32393	1.33929	0.432035	-0.16491	0.432035	0.0190806
7.93e-05	300	278.189	28.0668	0.120292	0.110383	-5.78961	1.33929	0.432032	-0.164839	0.432032	0.0190206
7.94e-05	300	278.143	28.0662	0.120401	0.110547	-7.25166	1.33929	0.43203	-0.164781	0.43203	0.0189721
7.95e-05	300	278.106	28.0657	0.120489	0.110681	-8.71006	1.33929	0.432029	-0.164736	0.432029	0.0189349
7.96e-05	300	278.077	28.0654	0.120557	0.110784	-10.1648	1.33929	0.432028	-0.164705	0.432028	0.0189089
7.97e-05	300	278.057	28.0651	0.120604	0.110855	-11.6159	1.33929	0.432027	-0.164687	0.432027	0.0188942
7.98e-05	300	278.046	28.065	0.120631	0.110896	-13.0633	1.33929	0.432027	-0.164683	0.432027	0.0188907
7.99e-05	300	278.043	28.065	0.120638	0.110906	-14.5071	1.33929	0.432027	-0.164683	0.432027	0.0188907
7.996e-05	300	278.043	28.065	0.120638	0.110906	-14.5071	1.33929	0.432027	-0.164692	0.432027	0.0188983
8e-05	300	278.049	28.065	0.120624	0.110885	-15.9471	1.33929	0.432028	-0.164718	0.432028	0.0189198
8.01e-05	300	278.066	28.0652	0.120585	0.110825	-17.3825	1.33929	0.432029	-0.164754	0.432029	0.0189497
8.02e-05	300	278.089	28.0655	0.12053	0.110743	-18.8152	1.33929	0.432031	-0.164803	0.432031	0.0189907
8.03e-05	300	278.12	28.0659	0.120455	0.11063	-20.2441	1.33929	0.432033	-0.164865	0.432033	0.0190428
8.04e-05	300	278.16	28.0664	0.12036	0.110486	-21.6693	1.33929	0.432036	-0.16494	0.432036	0.0191061
8.05e-05	300	278.209	28.067	0.120245	0.110313	-23.0907	1.33929	0.432039	-0.165032	0.432039	0.0191833
8.06e-05	300	278.268	28.0677	0.120105	0.110101	-24.5075	1.33929	0.432043	-0.165134	0.432043	0.019269
8.07e-05	300	278.333	28.0685	0.11995	0.109866	-25.9215	1.33929	0.432047	-0.165249	0.432047	0.019366
8.08e-05	300	278.407	28.0694	0.119774	0.109601	-27.3317	1.33929	0.432051	-0.165377	0.432051	0.0194743
8.09e-05	300	278.49	28.0704	0.119579	0.109307	-28.7381	1.33929	0.432056	-0.165518	0.432056	0.0195939
8.1e-05	300	278.581	28.0715	0.119364	0.108982	-30.1408	1.33929	0.432062	-0.165672	0.432062	0.0197251
8.11e-05	300	278.68	28.0728	0.119129	0.108627	-31.5397	1.33929	0.432068	-0.165839	0.432068	0.0198678
8.12e-05	300	278.787	28.0741	0.118874	0.108242	-32.9348	1.33929	0.432074	-0.166019	0.432074	0.0200221
8.13e-05	300	278.903	28.0755	0.1186	0.107827	-34.326	1.33929	0.432081	-0.166212	0.432081	0.0201881
8.14e-05	300	279.027	28.077	0.118306	0.107383	-35.7135	1.33929	0.432088	-0.166418	0.432088	0.020366
8.15e-05	300	279.16	28.0786	0.117992	0.106909	-37.0972	1.33929	0.432096	-0.166636	0.432096	0.0205559
8.16e-05	300	279.3	28.0803	0.117658	0.106405	-38.477	1.33929	0.432104	-0.166868	0.432104	0.0207579
8.17e-05	300	279.449	28.0822	0.117305	0.105872	-39.853	1.33929	0.432112	-0.167112	0.432112	0.0209721
8.18e-05	300	279.606	28.0841	0.116933	0.105309	-41.2252	1.33929	0.432121	-0.167369	0.432121	0.0211987
8.19e-05	300	279.772	28.0861	0.116541	0.104717	-42.5935	1.33929	0.432131	-0.167638	0.432131	0.0214377
8.2e-05	300	279.945	28.0882	0.116129	0.104096	-43.9579	1.33929	0.432045	-0.167719	0.432045	0.0213917
8.21e-05	300	280.111	28.0902	0.116138	0.104173	-40.8309	1.33929	0.431921	-0.167713	0.431921	0.0212238
8.22e-05	300	280.266	28.0921	0.116329	0.104551	-37.7083	1.33929	0.431819	-0.167707	0.431819	0.0210862
8.23e-05	300	280.393	28.0937	0.116487	0.104862	-33.0983	1.33929	0.43174	-0.167703	0.43174	0.0209786
8.24e-05	300	280.492	28.0949	0.11661	0.105106	-28.4989	1.33929	0.431702	-0.167702	0.431702	0.0209273
8.25e-05	300	280.54	28.0955	0.116669	0.105222	-19.4144	1.33929	0.431801	-0.167707	0.431801	0.0210608
8.26e-05	300	280.416	28.094	0.116516	0.104919	-16.8283	1.33929	0.431895	-0.167711	0.431895	0.0211885
8.27e-05	300	280.298	28.0925	0.11637	0.10463	-12.8393	1.33929	0.432026	-0.167718	0.432026	0.0213662
8.28e-05	300	280.135	28.0905	0.116167	0.10423	-11.0303	1.33929	0.432133	-0.167695	0.432133	0.0214883
8.29e-05	300	279.982	28.0887	0.116043	0.103965	-9.26682	1.33929	0.432125	-0.167474	0.432125	0.0212917
8.3e-05	300	279.839	28.0869	0.11638	0.104475	-7.54766	1.33929	0.432118	-0.167268	0.432118	0.0211099
8.31e-05	300	279.707	28.0853	0.116694	0.104948	-5.87175	1.33929	0.432111	-0.167078	0.432111	0.0209424
8.32e-05	300	279.585	28.0838	0.116984	0.105387	-4.23802	1.33929	0.432105	-0.166903	0.432105	0.0207888
8.33e-05	300	279.472	28.0824	0.117252	0.105791	-2.64542	1.33929	0.432099	-0.166742	0.432099	0.0206484
8.34e-05	300	279.369	28.0812	0.117496	0.10616	-1.09294	1.33929	0.432094	-0.166596	0.432094	0.020521
8.35e-05	300	279.274	28.08	0.11772	0.106497	0.410785	1.33929	0.43209	-0.166467	0.43209	0.0204092
8.36e-05	300	279.192	28.079	0.117916	0.106794	1.8921	1.33929	0.432086	-0.16635	0.432086	0.0203079
8.37e-05	300	279.116	28.0781	0.118094	0.107063	3.36093	1.33929	0.432082	-0.166247	0.432082	0.0202187
8.38e-05	300	279.05	28.0773	0.118252	0.107301	4.82583	1.33929	0.432079	-0.166156	0.432079	0.0201398
8.39e-05	300	278.991	28.0766	0.118391	0.107512	6.28685	1.33929	0.432079	-0.166156	0.432079	0.0201398
8.396e-05	300	278.991	28.0766	0.118391	0.107512	6.28685	1.33929	0.432076	-0.166078	0.432076	0.0200728
8.4e-05	300	278.941	28.0759	0.11851	0.107691	7.74398	1.33929	0.432074	-0.166017	0.432074	0.0200204
8.41e-05	300	278.902	28.0755	0.118603	0.107832	9.19624	1.33929	0.432072	-0.165966	0.432072	0.0199768
8.42e-05	300	278.869	28.0751	0.11868	0.107949	10.6456	1.33929	0.432071	-0.165929	0.432071	0.0199447
8.43e-05	300	278.845	28.0748	0.118737	0.108035	12.091	1.33929	0.43207	-0.165905	0.43207	0.0199241
8.44e-05	300	278.83	28.0746	0.118774	0.10809	13.5325	1.33929	0.43207	-0.165898	0.43207	0.0199179
8.45e-05	300	278.825	28.0745	0.118785	0.108107	14.97	1.33929	0.43207	-0.165902	0.43207	0.0199216
8.46e-05	300	278.828	28.0746	0.118778	0.108097	16.4026	1.33929	0.43207	-0.16592	0.43207	0.0199368
8.47e-05	300	278.839	28.0747	0.118751	0.108056	17.8323	1.33929	0.432072	-0.165949	0.432072	0.0199619
8.48e-05	300	278.858	28.0749	0.118707	0.107989	19.258	1.33929	0.432073	-0.165991	0.432073	0.0199984
8.49e-05	300	278.885	28.0753	0.118642	0.107891	20.6798	1.33929	0.432075	-0.166047	0.432075	0.0200463
8.5e-05	300	278.921	28.0757	0.118557	0.107762	22.0976	1.33929	0.432077	-0.166116	0.432077	0.0201056
8.51e-05	300	278.966	28.0762	0.118452	0.107603	23.5114	1.33929	0.43208	-0.166198	0.43208	0.0201764
8.52e-05	300	279.018	28.0769	0.118327	0.107414	24.9212	1.33929	0.432084	-0.166293	0.432084	0.0202585
8.53e-05	300	279.08	28.0776	0.118181	0.107195	26.3271	1.33929	0.432087	-0.166402	0.432087	0.0203522
8.54e-05	300	279.149	28.0785	0.118016	0.106946	27.7289	1.33929	0.432092	-0.166523	0.432092	0.0204574
8.55e-05	300	279.227	28.0794	0.117831	0.106666	29.1268	1.33929	0.432096	-0.166657	0.432096	0.0205742
8.56e-05	300	279.314	28.0805	0.117626	0.106357	30.5206	1.33929	0.432102	-0.166804	0.432102	0.0207027
8.57e-05	300	279.409	28.0817	0.117402	0.106017	31.9104	1.33929	0.432107	-0.166965	0.432107	0.0208429
8.58e-05	300	279.512	28.0829	0.117157	0.105648	33.2962	1.33929	0.432113	-0.167138	0.432113	0.0209949
8.59e-05	300	279.623	28.0843	0.116893	0.105249	34.678	1.33929	0.43212	-0.167327	0.43212	0.0211617
8.6e-05	300	279.745	28.0858	0.116605	0.104813	36.0557	1.33929	0.432126	-0.1675	0.432126	0.0213145
8.61e-05	300	279.856	28.0871	0.116341	0.104415	32.9412	1.33929	0.432132	-0.167657	0.432132	0.0214547
8.62e-05	300	279.958	28.0884	0.1161	0.104052	29.8314	1.33929	0.432109	-0.167722	0.432109	0.0214795
8.63e-05	300	280.031	28.0893	0.116038	0.103976	25.2349	1.33929	0.432092	-0.167721	0.432092	0.0214561
8.64e-05	300	280.052	28.0895	0.116065	0.104028	20.6498	1.33929	0.432112	-0.167722	0.432112	0.021483
8.65e-05	300	280.028	28.0892	0.116034	0.103968	11.5843	1.33929	0.432131	-0.167629	0.432131	0.0214298
8.66e-05	300	279.94	28.0882	0.116143	0.104116	9.14988	1.33929	0.432127	-0.167514	0.432127	0.0213272
8.67e-05	300	279.865	28.0872	0.116319	0.104382	5.31135	1.33929	0.432122	-0.167395	0.432122	0.0212221
8.68e-05	300	279.789	28.0863	0.1165	0.104656	3.69306	1.33929	0.432119	-0.167288	0.432119	0.0211277
8.69e-05	300	279.72	28.0855	0.116663	0.104902	2.11551	1.33929	0.432115	-0.167193	0.432115	0.021044
8.7e-05	300	279.659	28.0847	0.116808	0.105121	0.577683	1.33929	0.432112	-0.167112	0.432112	0.0209724
8.71e-05	300	279.607	28.0841	0.116932	0.105308	-0.911831	1.33929	0.43211	-0.167044	0.43211	0.0209128
8.72e-05	300	279.563	28.0835	0.117036	0.105465	-2.38797	1.33929	0.432108	-0.16699	0.432108	0.0208651
8.73e-05	300	279.528	28.0831	0.117119	0.10559	-3.85191	1.33929	0.432107	-0.166949	0.432107	0.0208292
8.74e-05	300	279.502	28.0828	0.117181	0.105684	-5.31503	1.33929	0.432106	-0.166922	0.432106	0.0208052
8.75e-05	300	279.484	28.0826	0.117223	0.105747	-6.77453	1.33929	0.432105	-0.166907	0.432105	0.0207928
8.76e-05	300	279.475	28.0825	0.117244	0.10578	-8.23039	1.33929	0.432105	-0.166907	0.432105	0.0207922
8.77e-05	300	279.474	28.0825	0.117246	0.105781	-9.68262	1.33929	0.432106	-0.166919	0.432106	0.0208033
8.78e-05	300	279.483	28.0826	0.117226	0.105752	-11.1312	1.33929	0.432107	-0.166945	0.432107	0.020826
8.79e-05	300	279.499	28.0828	0.117187	0.105693	-12.5761	1.33929	0.432107	-0.166945	0.432107	0.020826
8.796e-05	300	279.499	28.0828	0.117187	0.105693	-12.5761	1.33929	0.432108	-0.166984	0.432108	0.0208603
8.8e-05	300	279.524	28.0831	0.117127	0.105602	-14.0174	1.33929	0.43211	-0.16704	0.43211	0.0209092
8.81e-05	300	279.56	28.0835	0.117042	0.105474	-15.454	1.33929	0.432112	-0.167106	0.432112	0.0209668
8.82e-05	300	279.603	28.084	0.116942	0.105323	-16.8879	1.33929	0.432115	-0.167185	0.432115	0.0210362
8.83e-05	300	279.653	28.0847	0.116822	0.105141	-18.3181	1.33929	0.432118	-0.167276	0.432118	0.0211172
8.84e-05	300	279.712	28.0854	0.116682	0.10493	-19.7446	1.33929	0.432122	-0.167385	0.432122	0.0212129
8.85e-05	300	279.782	28.0862	0.116516	0.10468	-21.1673	1.33929	0.432126	-0.167504	0.432126	0.0213189
8.86e-05	300	279.859	28.0872	0.116334	0.104404	-22.5855	1.33929	0.432131	-0.167637	0.432131	0.0214368
8.87e-05	300	279.945	28.0882	0.116131	0.104098	-24.0008	1.33929	0.432104	-0.167722	0.432104	0.0214724
8.88e-05	300	280.037	28.0893	0.116046	0.103992	-25.4124	1.33929	0.432023	-0.167718	0.432023	0.021362
8.89e-05	300	280.139	28.0906	0.116172	0.104239	-26.8202	1.33929	0.431935	-0.167713	0.431935	0.0212429
8.9e-05	300	280.248	28.0919	0.116308	0.104508	-28.2243	1.33929	0.431841	-0.167709	0.431841	0.0211151
8.91e-05	300	280.366	28.0934	0.116454	0.104796	-29.6246	1.33929	0.43174	-0.167703	0.43174	0.0209788
8.92e-05	300	280.492	28.0949	0.11661	0.105105	-31.0211	1.33929	0.431632	-0.167698	0.431632	0.020834
8.93e-05	300	280.626	28.0965	0.116777	0.105434	-32.4139	1.33929	0.431518	-0.167692	0.431518	0.0206808
8.94e-05	300	280.769	28.0983	0.116953	0.105784	-33.8029	1.33929	0.431397	-0.167686	0.431397	0.0205194
8.95e-05	300	280.92	28.1001	0.11714	0.106153	-35.1881	1.33929	0.43127	-0.16768	0.43127	0.02035
8.96e-05	300	281.079	28.1021	0.117338	0.106543	-36.5694	1.33929	0.431136	-0.167673	0.431136	0.0201725
8.97e-05	300	281.246	28.1041	0.117545	0.106952	-37.947	1.33929	0.430995	-0.167666	0.430995	0.0199873
8.98e-05	300	281.421	28.1063	0.117762	0.107382	-39.3207	1.33929	0.430848	-0.167659	0.430848	0.0197943
8.99e-05	300	281.605	28.1085	0.11799	0.107832	-40.6907	1.33929	0.430693	-0.167651	0.430693	0.0195917
9e-05	300	281.798	28.1109	0.11823	0.108306	-42.0567	1.33929	0.430546	-0.167644	0.430546	0.0194012
9.01e-05	300	281.981	28.1131	0.118457	0.108754	-38.9311	1.33929	0.430408	-0.167637	0.430408	0.0192218
9.02e-05	300	282.155	28.1152	0.118672	0.109179	-35.8099	1.33929	0.430292	-0.167631	0.430292	0.0190724
9.03e-05	300	282.299	28.117	0.118851	0.109533	-31.2012	1.33929	0.430217	-0.167627	0.430217	0.0189771
9.04e-05	300	282.392	28.1181	0.118966	0.109761	-26.6032	1.33929	0.430174	-0.167625	0.430174	0.0189213
9.05e-05	300	282.446	28.1188	0.119034	0.109894	-22.0159	1.33929	0.430272	-0.16763	0.430272	0.0190476
9.06e-05	300	282.323	28.1173	0.118881	0.109593	-19.3752	1.33929	0.430354	-0.167634	0.430354	0.0191523
9.07e-05	300	282.222	28.116	0.118755	0.109344	-16.7904	1.33929	0.430471	-0.16764	0.430471	0.0193038
9.08e-05	300	282.075	28.1143	0.118573	0.108985	-14.8844	1.33929	0.43058	-0.167645	0.43058	0.0194453
9.09e-05	300	281.939	28.1126	0.118404	0.108651	-13.0262	1.33929	0.430682	-0.16765	0.430682	0.0195769
9.1e-05	300	281.813	28.111	0.118248	0.108341	-11.2148	1.33929	0.430775	-0.167655	0.430775	0.0196988
9.11e-05	300	281.696	28.1096	0.118103	0.108055	-9.44895	1.33929	0.430861	-0.167659	0.430861	0.0198111
9.12e-05	300	281.589	28.1083	0.11797	0.107792	-7.72749	1.33929	0.430939	-0.167663	0.430939	0.019914
9.13e-05	300	281.491	28.1071	0.117849	0.107553	-6.04934	1.33929	0.431009	-0.167667	0.431009	0.0200052
9.14e-05	300	281.404	28.1061	0.117741	0.10734	-4.41342	1.33929	0.431072	-0.16767	0.431072	0.0200885
9.15e-05	300	281.325	28.1051	0.117643	0.107147	-2.81869	1.33929	0.431128	-0.167673	0.431128	0.0201626
9.16e-05	300	281.255	28.1042	0.117556	0.106975	-1.26412	1.33929	0.431178	-0.167675	0.431178	0.0202289
9.17e-05	300	281.193	28.1035	0.117479	0.106822	0.241664	1.33929	0.431221	-0.167677	0.431221	0.0202859
9.18e-05	300	281.139	28.1028	0.117412	0.10669	1.72209	1.33929	0.431258	-0.167679	0.431258	0.0203339
9.19e-05	300	281.094	28.1023	0.117356	0.10658	3.19004	1.33929	0.431258	-0.167679	0.431258	0.0203339
9.196e-05	300	281.094	28.1023	0.117356	0.10658	3.19004	1.33929	0.431287	-0.167681	0.431287	0.0203727
9.2e-05	300	281.057	28.1018	0.117311	0.10649	4.65309	1.33929	0.431307	-0.167682	0.431307	0.0204
9.21e-05	300	281.032	28.1015	0.117279	0.106427	6.11129	1.33929	0.431323	-0.167683	0.431323	0.0204205
9.22e-05	300	281.012	28.1013	0.117255	0.10638	7.56658	1.33929	0.431331	-0.167683	0.431331	0.0204318
9.23e-05	300	281.002	28.1011	0.117242	0.106354	9.01797	1.33929	0.431333	-0.167683	0.431333	0.020434
9.24e-05	300	281	28.1011	0.11724	0.106349	10.4655	1.33929	0.431326	-0.167683	0.431326	0.0204248
9.25e-05	300	281.008	28.1012	0.11725	0.106371	11.9091	1.33929	0.431313	-0.167682	0.431313	0.0204076
9.26e-05	300	281.024	28.1014	0.11727	0.10641	13.3478	1.33929	0.431293	-0.167681	0.431293	0.0203814
9.27e-05	300	281.049	28.1017	0.117301	0.10647	14.7835	1.33929	0.431268	-0.16768	0.431268	0.0203474
9.28e-05	300	281.081	28.1021	0.117341	0.106549	16.2153	1.33929	0.431235	-0.167678	0.431235	0.0203044
9.29e-05	300	281.122	28.1026	0.117391	0.106648	17.6432	1.33929	0.431196	-0.167676	0.431196	0.0202524
9.3e-05	300	281.17	28.1032	0.117451	0.106768	19.0671	1.33929	0.43115	-0.167674	0.43115	0.0201916
9.31e-05	300	281.228	28.1039	0.117522	0.106908	20.4871	1.33929	0.431097	-0.167671	0.431097	0.020122
9.32e-05	300	281.294	28.1047	0.117604	0.107069	21.9032	1.33929	0.431038	-0.167668	0.431038	0.0200437
9.33e-05	300	281.368	28.1056	0.117696	0.107251	23.3152	1.33929	0.430972	-0.167665	0.430972	0.0199568
9.34e-05	300	281.45	28.1066	0.117798	0.107453	24.7233	1.33929	0.430899	-0.167661	0.430899	0.0198613
9.35e-05	300	281.541	28.1077	0.117911	0.107675	26.1274	1.33929	0.43082	-0.167657	0.43082	0.0197573
9.36e-05	300	281.64	28.1089	0.118034	0.107918	27.5275	1.33929	0.430734	-0.167653	0.430734	0.0196449
9.37e-05	300	281.747	28.1102	0.118167	0.108181	28.9236	1.33929	0.430641	-0.167648	0.430641	0.0195242
9.38e-05	300	281.863	28.1117	0.11831	0.108465	30.3157	1.33929	0.430542	-0.167643	0.430542	0.0193953
9.39e-05	300	281.987	28.1132	0.118464	0.108768	31.7038	1.33929	0.430434	-0.167638	0.430434	0.0192562
9.4e-05	300	282.121	28.1148	0.11863	0.109097	33.0869	1.33929	0.430335	-0.167633	0.430335	0.0191286
9.41e-05	300	282.245	28.1163	0.118784	0.1094	29.9789	1.33929	0.430244	-0.167628	0.430244	0.0190113
9.42e-05	300	282.359	28.1177	0.118925	0.109679	26.8747	1.33929	0.430175	-0.167625	0.430175	0.0189234
9.43e-05	300	282.444	28.1188	0.119031	0.109889	22.284	1.33929	0.430129	-0.167623	0.430129	0.0188638
9.44e-05	300	282.503	28.1195	0.119103	0.110031	17.7048	1.33929	0.430124	-0.167622	0.430124	0.0188572
9.45e-05	300	282.509	28.1196	0.119111	0.110047	13.1373	1.33929	0.430207	-0.167627	0.430207	0.0189636
9.46e-05	300	282.405	28.1183	0.118982	0.109793	10.6682	1.33929	0.430286	-0.167631	0.430286	0.0190647
9.47e-05	300	282.307	28.1171	0.118861	0.109552	8.25218	1.33929	0.430385	-0.167636	0.430385	0.0191929
9.48e-05	300	282.183	28.1156	0.118706	0.109247	6.56098	1.33929	0.430477	-0.16764	0.430477	0.0193115
9.49e-05	300	282.068	28.1142	0.118564	0.108966	4.91231	1.33929	0.430561	-0.167644	0.430561	0.0194206
9.5e-05	300	281.963	28.1129	0.118434	0.108709	3.30514	1.33929	0.430638	-0.167648	0.430638	0.0195204
9.51e-05	300	281.867	28.1117	0.118315	0.108474	1.73842	1.33929	0.430706	-0.167652	0.430706	0.0196088
9.52e-05	300	281.782	28.1107	0.11821	0.108266	0.211164	1.33929	0.430768	-0.167655	0.430768	0.0196893
9.53e-05	300	281.705	28.1097	0.118114	0.108077	-1.26842	1.33929	0.430823	-0.167657	0.430823	0.0197608
9.54e-05	300	281.637	28.1089	0.118029	0.10791	-2.74528	1.33929	0.430871	-0.16766	0.430871	0.0198245
9.55e-05	300	281.576	28.1082	0.117954	0.107761	-4.21005	1.33929	0.430913	-0.167662	0.430913	0.0198791
9.56e-05	300	281.524	28.1075	0.11789	0.107634	-5.6712	1.33929	0.430948	-0.167664	0.430948	0.0199246
9.57e-05	300	281.481	28.107	0.117836	0.107528	-7.12873	1.33929	0.430975	-0.167665	0.430975	0.0199611
9.58e-05	300	281.446	28.1066	0.117793	0.107443	-8.58264	1.33929	0.430996	-0.167666	0.430996	0.0199885
9.59e-05	300	281.42	28.1062	0.117761	0.107379	-10.0329	1.33929	0.430996	-0.167666	0.430996	0.0199885
9.596e-05	300	281.42	28.1062	0.117761	0.107379	-10.0329	1.33929	0.43101	-0.167667	0.43101	0.0200069
9.6e-05	300	281.403	28.106	0.117739	0.107336	-11.4795	1.33929	0.431015	-0.167667	0.431015	0.0200139
9.61e-05	300	281.396	28.106	0.117731	0.10732	-12.9216	1.33929	0.431016	-0.167667	0.431016	0.0200141
9.62e-05	300	281.396	28.1059	0.117731	0.10732	-14.3608	1.33929	0.431009	-0.167667	0.431009	0.0200053
9.63e-05	300	281.404	28.106	0.117741	0.10734	-15.7965	1.33929	0.430995	-0.167666	0.430995	0.0199876
9.64e-05	300	281.421	28.1063	0.117762	0.107381	-17.2284	1.33929	0.430973	-0.167665	0.430973	0.0199586
9.65e-05	300	281.448	28.1066	0.117796	0.107449	-18.6566	1.33929	0.430945	-0.167664	0.430945	0.0199218
9.66e-05	300	281.483	28.107	0.117839	0.107534	-20.0802	1.33929	0.430911	-0.167662	0.430911	0.0198761
9.67e-05	300	281.527	28.1075	0.117893	0.107641	-21.501	1.33929	0.43087	-0.16766	0.43087	0.0198228
9.68e-05	300	281.578	28.1082	0.117956	0.107765	-22.9181	1.33929	0.430822	-0.167657	0.430822	0.0197607
9.69e-05	300	281.637	28.1089	0.11803	0.10791	-24.3315	1.33929	0.430768	-0.167655	0.430768	0.0196898
9.7e-05	300	281.704	28.1097	0.118114	0.108076	-25.7411	1.33929	0.430707	-0.167652	0.430707	0.0196103
9.71e-05	300	281.781	28.1107	0.118208	0.108262	-27.147	1.33929	0.43064	-0.167648	0.43064	0.0195223
9.72e-05	300	281.865	28.1117	0.118313	0.108469	-28.5491	1.33929	0.430565	-0.167645	0.430565	0.0194258
9.73e-05	300	281.958	28.1128	0.118428	0.108696	-29.9475	1.33929	0.430484	-0.16764	0.430484	0.0193209
9.74e-05	300	282.059	28.1141	0.118553	0.108944	-31.3421	1.33929	0.430397	-0.167636	0.430397	0.0192077
9.75e-05	300	282.168	28.1154	0.118689	0.109212	-32.7329	1.33929	0.430302	-0.167631	0.430302	0.0190862
9.76e-05	300	282.286	28.1168	0.118835	0.109501	-34.1199	1.33929	0.430201	-0.167626	0.430201	0.0189567
9.77e-05	300	282.412	28.1184	0.118991	0.109809	-35.5032	1.33929	0.430094	-0.167621	0.430094	0.0188192
9.78e-05	300	282.546	28.12	0.119157	0.110138	-36.8826	1.33929	0.42998	-0.167615	0.42998	0.0186738
9.79e-05	300	282.689	28.1217	0.119334	0.110487	-38.2582	1.33929	0.429857	-0.167609	0.429857	0.0185186
9.8e-05	300	282.841	28.1236	0.119523	0.110861	-39.629	1.33929	0.429744	-0.167603	0.429744	0.0183747
9.81e-05	300	282.983	28.1254	0.119699	0.111209	-36.5093	1.33929	0.429637	-0.167598	0.429637	0.0182411
9.82e-05	300	283.116	28.127	0.119864	0.111534	-33.393	1.33929	0.429554	-0.167594	0.429554	0.0181365
9.83e-05	300	283.22	28.1282	0.119993	0.111788	-28.7897	1.33929	0.429493	-0.167591	0.429493	0.0180596
9.84e-05	300	283.296	28.1292	0.120088	0.111976	-24.197	1.33929	0.429473	-0.16759	0.429473	0.0180348
9.85e-05	300	283.321	28.1295	0.120118	0.112037	-19.6151	1.33929	0.429563	-0.167594	0.429563	0.0181479
9.86e-05	300	283.208	28.1281	0.119979	0.111761	-17.0213	1.33929	0.429649	-0.167599	0.429649	0.0182557
9.87e-05	300	283.101	28.1268	0.119846	0.111498	-14.4826	1.33929	0.429763	-0.167604	0.429763	0.0183989
9.88e-05	300	282.959	28.1251	0.11967	0.111151	-12.6354	1.33929	0.429868	-0.16761	0.429868	0.0185325
9.89e-05	300	282.828	28.1234	0.119506	0.110827	-10.8345	1.33929	0.429966	-0.167615	0.429966	0.0186565
9.9e-05	300	282.706	28.122	0.119355	0.110529	-9.07901	1.33929	0.430056	-0.167619	0.430056	0.0187712
9.91e-05	300	282.593	28.1206	0.119215	0.110253	-7.36764	1.33929	0.430139	-0.167623	0.430139	0.0188766
9.92e-05	300	282.49	28.1193	0.119088	0.110001	-5.69932	1.33929	0.430214	-0.167627	0.430214	0.0189728
9.93e-05	300	282.396	28.1182	0.118971	0.109771	-4.07299	1.33929	0.43028	-0.16763	0.43028	0.0190578
9.94e-05	300	282.314	28.1172	0.118869	0.109568	-2.48761	1.33929	0.43034	-0.167633	0.43034	0.0191351
9.95e-05	300	282.239	28.1162	0.118776	0.109384	-0.942161	1.33929	0.430393	-0.167636	0.430393	0.0192035
9.96e-05	300	282.172	28.1154	0.118694	0.109222	0.554706	1.33929	0.43044	-0.167638	0.43044	0.0192642
9.97e-05	300	282.114	28.1147	0.118621	0.109078	2.0317	1.33929	0.430481	-0.16764	0.430481	0.019316
9.98e-05	300	282.064	28.1141	0.118559	0.108956	3.49626	1.33929	0.430514	-0.167642	0.430514	0.0193589
9.99e-05	300	282.022	28.1136	0.118507	0.108854	4.95772	1.33929	0.430514	-0.167642	0.430514	0.0193589
9.996e-05	300	282.022	28.1136	0.118507	0.108854	4.95772	1.33929	0.430523	-0.167627	0.430523	0.0193899
0.0001	300	281.989	28.1132	0.118467	0.108774	6.41529	1.33927	0.430527	-0.167611	0.430527	0.0194139
0.0001001	299.996	281.963	28.1129	0.118435	0.10871	7.86796	1.33925	0.430525	-0.167595	0.430525	0.0194313
0.0001002	299.991	281.944	28.1127	0.11841	0.108663	9.31765	1.33923	0.430517	-0.167579	0.430517	0.0194397
0.0001003	299.987	281.933	28.1127	0.118397	0.108636	10.7633	1.33921	0.430502	-0.167562	0.430502	0.0194393
0.0001004	299.983	281.931	28.1127	0.118394	0.10863	12.205	1.33919	0.430478	-0.167545	0.430478	0.0194278
0.0001005	299.979	281.939	28.1128	0.118404	0.10865	13.6428	1.33917	0.430448	-0.167528	0.430448	0.0194086
0.0001006	299.974	281.954	28.1131	0.118424	0.108688	15.0754	1.33915	0.430412	-0.16751	0.430412	0.0193805
0.0001007	299.97	281.979	28.1134	0.118453	0.108748	16.5051	1.33913	0.43037	-0.167492	0.43037	0.0193449
0.0001008	299.966	282.01	28.1139	0.118493	0.108825	17.9308	1.33911	0.430321	-0.167474	0.430321	0.0193005
0.0001009	299.961	282.05	28.1144	0.118542	0.108923	19.3524	1.33909	0.430265	-0.167455	0.430265	0.0192474
0.000101	299.957	282.099	28.115	0.118602	0.109041	20.77	1.33908	0.430202	-0.167436	0.430202	0.0191858
0.0001011	299.953	282.155	28.1158	0.118673	0.109181	22.1836	1.33906	0.430133	-0.167417	0.430133	0.0191157
0.0001012	299.949	282.221	28.1166	0.118753	0.10934	23.5931	1.33904	0.430057	-0.167397	0.430057	0.019037
0.0001013	299.944	282.294	28.1176	0.118845	0.10952	24.9985	1.33902	0.429975	-0.167377	0.429975	0.01895
0.0001014	299.94	282.376	28.1186	0.118946	0.109721	26.3999	1.339	0.429886	-0.167357	0.429886	0.0188547
0.0001015	299.936	282.466	28.1198	0.119058	0.109942	27.7972	1.33898	0.42979	-0.167337	0.42979	0.0187512
0.0001016	299.931	282.564	28.121	0.11918	0.110183	29.1905	1.33896	0.429687	-0.167316	0.429687	0.0186396
0.0001017	299.927	282.671	28.1224	0.119312	0.110444	30.5796	1.33894	0.429578	-0.167294	0.429578	0.01852
0.0001018	299.923	282.786	28.1238	0.119455	0.110726	31.9647	1.33892	0.429463	-0.167273	0.429463	0.0183924
0.0001019	299.919	282.909	28.1254	0.119607	0.111027	33.3456	1.3389	0.429339	-0.167251	0.429339	0.018255
0.000102	299.914	283.042	28.1271	0.119773	0.111354	34.7214	1.33888	0.429224	-0.167229	0.429224	0.0181288
0.0001021	299.91	283.165	28.1286	0.119925	0.111655	31.6077	1.33886	0.429116	-0.167208	0.429116	0.0180126
0.0001022	299.906	283.278	28.13	0.120065	0.111932	28.4977	1.33885	0.429032	-0.167188	0.429032	0.0179252
0.0001023	299.901	283.363	28.1311	0.12017	0.112139	23.9017	1.33883	0.428969	-0.167169	0.428969	0.0178652
0.0001024	299.897	283.42	28.1319	0.120241	0.11228	19.3173	1.33881	0.428947	-0.167152	0.428947	0.017857
0.0001025	299.893	283.426	28.132	0.120248	0.112293	14.7444	1.33879	0.429018	-0.16714	0.429018	0.0179632
0.0001026	299.889	283.316	28.1307	0.120112	0.112025	12.2462	1.33877	0.429084	-0.167127	0.429084	0.0180644
0.0001027	299.884	283.212	28.1295	0.119983	0.11177	9.80161	1.33875	0.429172	-0.167116	0.429172	0.0181934
0.0001028	299.88	283.081	28.1279	0.11982	0.111448	8.07467	1.33873	0.429253	-0.167104	0.429253	0.0183132
0.0001029	299.876	282.959	28.1265	0.119669	0.11115	6.39125	1.33871	0.429325	-0.167092	0.429325	0.0184237
0.000103	299.871	282.847	28.1252	0.11953	0.110875	4.75027	1.33869	0.429391	-0.167079	0.429391	0.0185251
0.0001031	299.867	282.744	28.124	0.119403	0.110623	3.15066	1.33867	0.429447	-0.167066	0.429447	0.0186153
0.0001032	299.863	282.652	28.1229	0.119289	0.110398	1.59141	1.33865	0.429497	-0.167053	0.429497	0.018698
0.0001033	299.859	282.568	28.1219	0.119185	0.110193	0.0715128	1.33864	0.42954	-0.167039	0.42954	0.0187718
0.0001034	299.854	282.493	28.121	0.119092	0.110008	-1.40312	1.33862	0.429577	-0.167025	0.429577	0.0188381
0.0001035	299.85	282.426	28.1203	0.119008	0.109843	-2.875	1.3386	0.429607	-0.167011	0.429607	0.0188955
0.0001036	299.846	282.367	28.1196	0.118935	0.109698	-4.33549	1.33858	0.429631	-0.166996	0.429631	0.0189442
0.0001037	299.841	282.316	28.119	0.118872	0.109575	-5.79229	1.33856	0.429647	-0.166981	0.429647	0.0189841
0.0001038	299.837	282.275	28.1186	0.118821	0.109473	-7.2454	1.33854	0.429663	-0.166973	0.429663	0.0190163
0.0001039	299.833	282.242	28.1182	0.11878	0.109392	-8.6948	1.33853	0.429658	-0.166966	0.429658	0.0190176
0.00010396	299.83	282.239	28.1182	0.118777	0.109386	-8.6948	1.33852	0.429659	-0.16695	0.429659	0.0190374
0.000104	299.829	282.217	28.118	0.118749	0.109332	-10.1405	1.3385	0.429653	-0.166934	0.429653	0.0190486
0.0001041	299.824	282.203	28.1178	0.118732	0.109298	-11.5815	1.33848	0.429642	-0.166918	0.429642	0.0190533
0.0001042	299.82	282.196	28.1178	0.118723	0.10928	-13.0198	1.33846	0.429624	-0.166901	0.429624	0.0190492
0.0001043	299.816	282.197	28.1179	0.118724	0.109283	-14.4542	1.33844	0.429599	-0.166884	0.429599	0.0190363
0.0001044	299.811	282.207	28.118	0.118736	0.109306	-15.885	1.33842	0.429566	-0.166866	0.429566	0.0190126
0.0001045	299.807	282.227	28.1183	0.118761	0.109356	-17.3119	1.33841	0.429526	-0.166849	0.429526	0.0189813
0.0001046	299.803	282.255	28.1187	0.118796	0.109424	-18.7342	1.33839	0.429481	-0.16683	0.429481	0.0189413
0.0001047	299.799	282.291	28.1192	0.118841	0.109512	-20.1537	1.33837	0.429429	-0.166812	0.429429	0.0188938
0.0001048	299.794	282.334	28.1198	0.118894	0.109619	-21.5693	1.33835	0.42937	-0.166793	0.42937	0.0188378
0.0001049	299.79	282.386	28.1205	0.118959	0.109746	-22.9811	1.33833	0.429305	-0.166774	0.429305	0.0187733
0.000105	299.786	282.446	28.1213	0.119033	0.109893	-24.3892	1.33831	0.429233	-0.166755	0.429233	0.0187005
0.0001051	299.781	282.515	28.1221	0.119118	0.110062	-25.7934	1.33829	0.429155	-0.166735	0.429155	0.0186192
0.0001052	299.777	282.592	28.1231	0.119214	0.11025	-27.1938	1.33827	0.42907	-0.166715	0.42907	0.0185298
0.0001053	299.773	282.677	28.1242	0.11932	0.110459	-28.5904	1.33825	0.428978	-0.166694	0.428978	0.0184321
0.0001054	299.769	282.771	28.1254	0.119436	0.110688	-29.9832	1.33823	0.42888	-0.166674	0.42888	0.0183264
0.0001055	299.764	282.872	28.1267	0.119562	0.110938	-31.3721	1.33821	0.428775	-0.166653	0.428775	0.0182126
0.0001056	299.76	282.983	28.1281	0.119698	0.111207	-32.7572	1.3382	0.428663	-0.166631	0.428663	0.018091
0.0001057	299.756	283.101	28.1296	0.119845	0.111497	-34.1384	1.33818	0.428545	-0.166609	0.428545	0.0179616
0.0001058	299.751	283.227	28.1312	0.120002	0.111807	-35.5157	1.33816	0.428421	-0.166587	0.428421	0.0178245
0.0001059	299.747	283.362	28.1329	0.120169	0.112137	-36.8892	1.33814	0.428288	-0.166565	0.428288	0.0176778
0.000106	299.743	283.507	28.1347	0.120349	0.112492	-38.2578	1.33812	0.428164	-0.166543	0.428164	0.0175422
0.0001061	299.739	283.641	28.1364	0.120515	0.112821	-35.1395	1.3381	0.428048	-0.166521	0.428048	0.0174167
0.0001062	299.734	283.766	28.138	0.120669	0.113126	-32.0246	1.33808	0.427954	-0.166501	0.427954	0.0173194
0.0001063	299.73	283.862	28.1392	0.120789	0.113362	-27.424	1.33806	0.427882	-0.166481	0.427882	0.0172491
0.0001064	299.726	283.931	28.1401	0.120874	0.11353	-22.834	1.33804	0.427851	-0.166464	0.427851	0.0172297
0.0001065	299.721	283.948	28.1404	0.120895	0.113572	-13.764	1.33802	0.427926	-0.166452	0.427926	0.0173396
0.0001066	299.717	283.833	28.139	0.120753	0.11329	-11.2941	1.338	0.427997	-0.166439	0.427997	0.0174444
0.0001067	299.713	283.723	28.1377	0.120617	0.113022	-7.42111	1.33798	0.428093	-0.166428	0.428093	0.0175821
0.0001068	299.709	283.581	28.136	0.12044	0.112673	-5.75894	1.33797	0.428182	-0.166417	0.428182	0.0177106
0.0001069	299.704	283.448	28.1345	0.120276	0.112348	-4.13869	1.33795	0.428263	-0.166405	0.428263	0.0178298
0.000107	299.7	283.325	28.133	0.120124	0.112047	-2.55932	1.33793	0.428337	-0.166393	0.428337	0.0179399
0.0001071	299.696	283.212	28.1317	0.119983	0.11177	-1.01981	1.33791	0.428403	-0.166381	0.428403	0.0180411
0.0001072	299.691	283.108	28.1304	0.119854	0.111515	0.471218	1.33789	0.42846	-0.166368	0.42846	0.0181313
0.0001073	299.687	283.015	28.1294	0.119739	0.111287	1.94089	1.33787	0.428511	-0.166354	0.428511	0.018214
0.0001074	299.683	282.93	28.1284	0.119633	0.111079	3.39813	1.33785	0.428555	-0.166341	0.428555	0.0182881
0.0001075	299.679	282.854	28.1275	0.119539	0.110892	4.85167	1.33783	0.428592	-0.166327	0.428592	0.0183547
0.0001076	299.674	282.785	28.1267	0.119453	0.110723	6.30127	1.33781	0.428623	-0.166313	0.428623	0.0184126
0.0001077	299.67	282.725	28.126	0.119379	0.110575	7.74692	1.33779	0.428648	-0.166298	0.428648	0.018462
0.0001078	299.666	282.673	28.1254	0.119315	0.110449	9.18862	1.33777	0.428672	-0.16629	0.428672	0.0185038
0.0001079	299.661	282.63	28.1249	0.119261	0.110344	10.6264	1.33776	0.428667	-0.166283	0.428667	0.0185051
0.00010796	299.659	282.628	28.1249	0.119258	0.110338	10.6264	1.33776	0.428675	-0.166268	0.428675	0.0185347
0.000108	299.657	282.596	28.1246	0.119219	0.110259	12.0601	1.33774	0.428677	-0.166252	0.428677	0.0185559
0.0001081	299.653	282.572	28.1243	0.119189	0.110201	13.4889	1.33772	0.428674	-0.166236	0.428674	0.0185706
0.0001082	299.649	282.555	28.1242	0.119168	0.110159	14.9148	1.3377	0.428664	-0.16622	0.428664	0.0185767
0.0001083	299.644	282.546	28.1241	0.119157	0.110137	16.3366	1.33768	0.428647	-0.166203	0.428647	0.0185742
0.0001084	299.64	282.545	28.1241	0.119156	0.110136	17.7544	1.33766	0.428624	-0.166186	0.428624	0.0185631
0.0001085	299.636	282.553	28.1243	0.119166	0.110156	19.1682	1.33764	0.428592	-0.166169	0.428592	0.0185413
0.0001086	299.631	282.572	28.1246	0.119189	0.110202	20.577	1.33762	0.428555	-0.166151	0.428555	0.0185131
0.0001087	299.627	282.597	28.1249	0.11922	0.110263	21.9828	1.3376	0.428511	-0.166133	0.428511	0.0184764
0.0001088	299.623	282.63	28.1254	0.119262	0.110345	23.3846	1.33758	0.428461	-0.166115	0.428461	0.0184313
0.0001089	299.619	282.672	28.1259	0.119313	0.110447	24.7823	1.33756	0.428404	-0.166096	0.428404	0.0183778
0.000109	299.614	282.722	28.1266	0.119376	0.110569	26.176	1.33754	0.428341	-0.166077	0.428341	0.018316
0.0001091	299.61	282.781	28.1274	0.119448	0.110712	27.5657	1.33753	0.42827	-0.166058	0.42827	0.0182459
0.0001092	299.606	282.847	28.1282	0.119531	0.110876	28.9513	1.33751	0.428194	-0.166038	0.428194	0.0181677
0.0001093	299.601	282.922	28.1292	0.119624	0.11106	30.3328	1.33749	0.42811	-0.166018	0.42811	0.0180813
0.0001094	299.597	283.006	28.1303	0.119727	0.111264	31.7102	1.33747	0.42802	-0.165997	0.42802	0.0179869
0.0001095	299.593	283.097	28.1314	0.11984	0.111488	33.0836	1.33745	0.427924	-0.165977	0.427924	0.0178846
0.0001096	299.589	283.197	28.1327	0.119964	0.111732	34.4529	1.33743	0.427821	-0.165956	0.427821	0.0177744
0.0001097	299.584	283.305	28.1341	0.120098	0.111996	35.8182	1.33741	0.427712	-0.165934	0.427712	0.0176565
0.0001098	299.58	283.421	28.1356	0.120242	0.112281	37.1793	1.33739	0.427596	-0.165913	0.427596	0.0175309
0.0001099	299.576	283.545	28.1371	0.120396	0.112585	38.5363	1.33737	0.427473	-0.165891	0.427473	0.0173978
0.00011	299.571	283.677	28.1388	0.12056	0.112909	39.8882	1.33735	0.427357	-0.165869	0.427357	0.0172727
0.0001101	299.567	283.802	28.1404	0.120714	0.113215	36.7563	1.33733	0.42725	-0.165848	0.42725	0.0171594
0.0001102	299.563	283.915	28.1418	0.120854	0.113492	33.6282	1.33731	0.427165	-0.165828	0.427165	0.0170731
0.0001103	299.559	284.001	28.1429	0.120961	0.113701	29.0161	1.3373	0.427101	-0.165809	0.427101	0.0170136
0.0001104	299.554	284.059	28.1437	0.121033	0.113844	24.4155	1.33728	0.427079	-0.165792	0.427079	0.0170045
0.0001105	299.55	284.065	28.1438	0.121041	0.11386	15.3409	1.33726	0.42715	-0.16578	0.42715	0.0171087
0.0001106	299.546	283.956	28.1425	0.120905	0.113591	12.8428	1.33724	0.427216	-0.165767	0.427216	0.0172079
0.0001107	299.541	283.851	28.1413	0.120775	0.113335	8.94393	1.33722	0.427305	-0.165756	0.427305	0.0173348
0.0001108	299.537	283.719	28.1397	0.120611	0.113011	7.24871	1.3372	0.427385	-0.165744	0.427385	0.0174528
0.0001109	299.533	283.596	28.1382	0.120459	0.11271	5.59621	1.33718	0.427459	-0.165732	0.427459	0.0175617
0.000111	299.529	283.482	28.1369	0.120318	0.112432	3.98538	1.33716	0.427525	-0.165719	0.427525	0.0176619
0.0001111	299.524	283.378	28.1357	0.120189	0.112177	2.41517	1.33714	0.427581	-0.165706	0.427581	0.0177512
0.0001112	299.52	283.285	28.1346	0.120074	0.111949	0.884582	1.33712	0.427632	-0.165693	0.427632	0.0178331
0.0001113	299.516	283.2	28.1336	0.119968	0.11174	-0.597865	1.3371	0.427676	-0.165679	0.427676	0.0179065
0.0001114	299.511	283.124	28.1327	0.119873	0.111553	-2.06144	1.33709	0.427714	-0.165666	0.427714	0.0179725
0.0001115	299.507	283.055	28.1319	0.119788	0.111384	-3.51284	1.33707	0.427745	-0.165651	0.427745	0.01803
0.0001116	299.503	282.994	28.1312	0.119713	0.111236	-4.96151	1.33705	0.427769	-0.165637	0.427769	0.018079
0.0001117	299.499	282.943	28.1306	0.119649	0.111109	-6.4065	1.33703	0.427787	-0.165622	0.427787	0.0181195
0.0001118	299.494	282.899	28.1302	0.119595	0.111003	-7.84782	1.33701	0.427804	-0.165613	0.427804	0.0181526
0.0001119	299.49	282.865	28.1298	0.119552	0.110918	-9.28546	1.337	0.427799	-0.165607	0.427799	0.0181539
0.00011196	299.487	282.862	28.1298	0.119549	0.110912	-9.28546	1.33699	0.427801	-0.165591	0.427801	0.0181748
0.000112	299.486	282.839	28.1295	0.11952	0.110854	-10.7194	1.33697	0.427796	-0.165575	0.427796	0.0181875
0.0001121	299.481	282.823	28.1294	0.119501	0.110816	-12.1487	1.33695	0.427787	-0.165558	0.427787	0.0181939
0.0001122	299.477	282.814	28.1293	0.119489	0.110794	-13.5753	1.33693	0.42777	-0.165542	0.42777	0.0181917
0.0001123	299.473	282.813	28.1294	0.119488	0.110792	-14.9981	1.33691	0.427747	-0.165525	0.427747	0.018181
0.0001124	299.469	282.821	28.1295	0.119498	0.110812	-16.4172	1.33689	0.427717	-0.165507	0.427717	0.0181618
0.0001125	299.464	282.837	28.1298	0.119518	0.110851	-17.8325	1.33687	0.427679	-0.16549	0.427679	0.0181322
0.0001126	299.46	282.864	28.1301	0.119551	0.110917	-19.2432	1.33686	0.427636	-0.165472	0.427636	0.0180962
0.0001127	299.456	282.897	28.1306	0.119592	0.110998	-20.6511	1.33684	0.427586	-0.165453	0.427586	0.0180519
0.0001128	299.451	282.938	28.1311	0.119644	0.111099	-22.0551	1.33682	0.427529	-0.165435	0.427529	0.0179994
0.0001129	299.447	282.988	28.1318	0.119705	0.111221	-23.4555	1.3368	0.427466	-0.165416	0.427466	0.0179386
0.000113	299.443	283.046	28.1326	0.119777	0.111363	-24.852	1.33678	0.427396	-0.165396	0.427396	0.0178696
0.0001131	299.439	283.112	28.1334	0.119859	0.111525	-26.2447	1.33676	0.42732	-0.165377	0.42732	0.0177925
0.0001132	299.434	283.187	28.1344	0.119952	0.111708	-27.6337	1.33674	0.427237	-0.165357	0.427237	0.0177075
0.0001133	299.43	283.27	28.1354	0.120055	0.111911	-29.0188	1.33672	0.427148	-0.165336	0.427148	0.0176144
0.0001134	299.426	283.361	28.1366	0.120168	0.112135	-30.4002	1.3367	0.427052	-0.165316	0.427052	0.0175135
0.0001135	299.421	283.46	28.1379	0.120291	0.112378	-31.7777	1.33668	0.426949	-0.165295	0.426949	0.0174049
0.0001136	299.417	283.568	28.1392	0.120424	0.112641	-33.1514	1.33666	0.42684	-0.165273	0.42684	0.0172886
0.0001137	299.413	283.684	28.1407	0.120568	0.112925	-34.5213	1.33665	0.426725	-0.165252	0.426725	0.0171647
0.0001138	299.409	283.807	28.1423	0.120721	0.113228	-35.8873	1.33663	0.426603	-0.16523	0.426603	0.0170333
0.0001139	299.404	283.939	28.1439	0.120885	0.113552	-37.2494	1.33661	0.426473	-0.165207	0.426473	0.0168927
0.000114	299.4	284.082	28.1457	0.121061	0.1139	-38.6068	1.33659	0.426352	-0.165185	0.426352	0.0167629
0.0001141	299.396	284.213	28.1474	0.121224	0.114222	-35.4824	1.33657	0.426238	-0.165164	0.426238	0.0166429
0.0001142	299.391	284.335	28.1489	0.121375	0.11452	-32.3615	1.33655	0.426147	-0.165143	0.426147	0.0165505
0.0001143	299.387	284.428	28.1501	0.121491	0.114749	-27.7566	1.33653	0.426077	-0.165124	0.426077	0.0164844
0.0001144	299.383	284.494	28.151	0.121573	0.114911	-23.1623	1.33651	0.426049	-0.165107	0.426049	0.016468
0.0001145	299.379	284.509	28.1512	0.121591	0.114946	-14.0931	1.33649	0.426122	-0.165095	0.426122	0.0165741
0.0001146	299.374	284.395	28.1499	0.12145	0.114668	-11.6236	1.33647	0.426191	-0.165082	0.426191	0.0166754
0.0001147	299.37	284.287	28.1486	0.121316	0.114403	-7.7526	1.33645	0.426286	-0.165071	0.426286	0.0168076
0.0001148	299.366	284.147	28.1469	0.121142	0.11406	-6.09229	1.33643	0.426372	-0.16506	0.426372	0.0169309
0.0001149	299.361	284.017	28.1454	0.120981	0.113741	-4.47385	1.33642	0.426451	-0.165048	0.426451	0.0170452
0.000115	299.357	283.896	28.144	0.120831	0.113445	-2.89624	1.3364	0.426522	-0.165036	0.426522	0.0171508
0.0001151	299.353	283.785	28.1426	0.120693	0.113173	-1.35844	1.33638	0.426586	-0.165023	0.426586	0.0172478
0.0001152	299.349	283.683	28.1414	0.120567	0.112923	0.131037	1.33636	0.426642	-0.16501	0.426642	0.0173341
0.0001153	299.344	283.592	28.1404	0.120454	0.1127	1.59324	1.33634	0.426691	-0.164997	0.426691	0.0174131
0.0001154	299.34	283.508	28.1394	0.12035	0.112496	3.04306	1.33632	0.426733	-0.164983	0.426733	0.0174838
0.0001155	299.336	283.434	28.1385	0.120258	0.112313	4.48723	1.3363	0.426769	-0.164969	0.426769	0.0175473
0.0001156	299.331	283.367	28.1378	0.120175	0.112148	5.92749	1.33628	0.426799	-0.164955	0.426799	0.0176023
0.0001157	299.327	283.308	28.1371	0.120102	0.112005	7.36384	1.33626	0.426822	-0.16494	0.426822	0.017649
0.0001158	299.323	283.258	28.1365	0.12004	0.111882	8.79626	1.33624	0.426844	-0.164932	0.426844	0.0176884
0.0001159	299.319	283.216	28.1361	0.119988	0.11178	10.2248	1.33623	0.42684	-0.164925	0.42684	0.0176897
0.00011596	299.316	283.214	28.1361	0.119985	0.111774	10.2248	1.33622	0.426847	-0.16491	0.426847	0.0177172
0.000116	299.314	283.183	28.1357	0.119947	0.111699	11.6493	1.33621	0.426848	-0.164894	0.426848	0.0177366
0.0001161	299.31	283.161	28.1355	0.11992	0.111645	13.0689	1.33619	0.426843	-0.164878	0.426843	0.0177497
0.0001162	299.306	283.145	28.1354	0.1199	0.111605	14.4856	1.33617	0.426832	-0.164862	0.426832	0.0177545
0.0001163	299.301	283.137	28.1353	0.11989	0.111587	15.8983	1.33615	0.426815	-0.164845	0.426815	0.0177509
0.0001164	299.297	283.138	28.1354	0.119891	0.111589	17.307	1.33613	0.42679	-0.164828	0.42679	0.0177389
0.0001165	299.293	283.147	28.1355	0.119903	0.111611	18.7118	1.33611	0.426758	-0.16481	0.426758	0.0177166
0.0001166	299.289	283.167	28.1358	0.119927	0.111659	20.1116	1.33609	0.42672	-0.164793	0.42672	0.0176881
0.0001167	299.284	283.193	28.1362	0.119959	0.111723	21.5084	1.33607	0.426676	-0.164775	0.426676	0.0176513
0.0001168	299.28	283.227	28.1367	0.120002	0.111807	22.9012	1.33605	0.426625	-0.164756	0.426625	0.0176064
0.0001169	299.276	283.27	28.1372	0.120055	0.111911	24.29	1.33603	0.426568	-0.164737	0.426568	0.0175534
0.000117	299.271	283.321	28.1379	0.120118	0.112036	25.6747	1.33601	0.426504	-0.164718	0.426504	0.0174923
0.0001171	299.267	283.38	28.1387	0.120191	0.11218	27.0555	1.33599	0.426434	-0.164699	0.426434	0.0174232
0.0001172	299.263	283.447	28.1396	0.120274	0.112345	28.4322	1.33598	0.426357	-0.164679	0.426357	0.0173462
0.0001173	299.259	283.523	28.1405	0.120368	0.112531	29.8049	1.33596	0.426273	-0.164659	0.426273	0.0172613
0.0001174	299.254	283.606	28.1416	0.120472	0.112736	31.1736	1.33594	0.426184	-0.164639	0.426184	0.0171687
0.0001175	299.25	283.698	28.1428	0.120586	0.112961	32.5382	1.33592	0.426087	-0.164618	0.426087	0.0170683
0.0001176	299.246	283.799	28.1441	0.12071	0.113206	33.8988	1.3359	0.425984	-0.164597	0.425984	0.0169604
0.0001177	299.241	283.907	28.1454	0.120844	0.113471	35.2554	1.33588	0.425875	-0.164576	0.425875	0.016845
0.0001178	299.237	284.023	28.1469	0.120989	0.113756	36.6078	1.33586	0.42576	-0.164554	0.42576	0.0167222
0.0001179	299.233	284.147	28.1485	0.121143	0.114061	37.9562	1.33584	0.425636	-0.164532	0.425636	0.0165902
0.000118	299.229	284.282	28.1502	0.12131	0.114391	39.2995	1.33582	0.425521	-0.164511	0.425521	0.0164689
0.0001181	299.224	284.406	28.1517	0.121463	0.114694	36.1642	1.3358	0.425414	-0.164489	0.425414	0.0163573
0.0001182	299.22	284.52	28.1532	0.121605	0.114974	33.0325	1.33578	0.425329	-0.164469	0.425329	0.0162729
0.0001183	299.216	284.606	28.1543	0.121711	0.115184	28.4186	1.33577	0.425265	-0.16445	0.425265	0.0162147
0.0001184	299.211	284.664	28.1551	0.121784	0.115327	23.8162	1.33575	0.425224	-0.164432	0.425224	0.0161824
0.0001185	299.207	284.695	28.1555	0.121822	0.115404	19.2254	1.33573	0.425314	-0.164421	0.425314	0.016308
0.0001186	299.203	284.56	28.1539	0.121655	0.115073	16.6531	1.33571	0.425394	-0.164409	0.425394	0.016422
0.0001187	299.199	284.438	28.1524	0.121503	0.114773	14.1356	1.33569	0.425509	-0.164399	0.425509	0.0165788
0.0001188	299.194	284.271	28.1504	0.121296	0.114364	12.319	1.33567	0.425616	-0.164389	0.425616	0.0167262
0.0001189	299.19	284.115	28.1486	0.121103	0.113982	10.5481	1.33565	0.425715	-0.164378	0.425715	0.0168644
0.000119	299.186	283.969	28.1468	0.120921	0.113624	8.82174	1.33563	0.425806	-0.164367	0.425806	0.0169936
0.0001191	299.181	283.833	28.1452	0.120753	0.11329	7.13891	1.33561	0.425889	-0.164355	0.425889	0.0171138
0.0001192	299.177	283.706	28.1437	0.120596	0.112981	5.4985	1.33559	0.425964	-0.164343	0.425964	0.0172251
0.0001193	299.173	283.59	28.1423	0.120451	0.112694	3.89944	1.33557	0.426033	-0.164331	0.426033	0.0173278
0.0001194	299.169	283.482	28.1411	0.120318	0.112431	2.34071	1.33555	0.426094	-0.164318	0.426094	0.0174218
0.0001195	299.164	283.383	28.1399	0.120195	0.112189	0.821316	1.33554	0.426146	-0.164305	0.426146	0.0175052
0.0001196	299.16	283.296	28.1389	0.120087	0.111975	-0.650284	1.33552	0.426192	-0.164291	0.426192	0.0175813
0.0001197	299.156	283.216	28.138	0.119987	0.111778	-2.10398	1.3355	0.426232	-0.164278	0.426232	0.0176492
0.0001198	299.151	283.144	28.1371	0.119899	0.111603	-3.54559	1.33548	0.426273	-0.16427	0.426273	0.0177108
0.0001199	299.147	283.08	28.1364	0.11982	0.111447	-4.98476	1.33547	0.426268	-0.164263	0.426268	0.0177121
0.00011996	299.145	283.078	28.1364	0.119817	0.111441	-4.98476	1.33546	0.426293	-0.164249	0.426293	0.0177619
0.00012	299.143	283.025	28.1358	0.119751	0.111311	-6.42028	1.33544	0.426311	-0.164234	0.426311	0.0178035
0.0001201	299.139	282.98	28.1353	0.119695	0.111201	-7.85123	1.33542	0.426324	-0.164219	0.426324	0.0178388
0.0001202	299.134	282.942	28.1349	0.119648	0.111107	-9.27946	1.3354	0.426331	-0.164203	0.426331	0.0178658
0.0001203	299.13	282.912	28.1345	0.119611	0.111034	-10.704	1.33538	0.426331	-0.164188	0.426331	0.0178843
0.0001204	299.126	282.89	28.1343	0.119584	0.110981	-12.1249	1.33536	0.426324	-0.164171	0.426324	0.0178944
0.0001205	299.121	282.877	28.1342	0.119568	0.11095	-13.542	1.33534	0.426309	-0.164155	0.426309	0.017894
0.0001206	299.117	282.875	28.1342	0.119565	0.110944	-14.9546	1.33533	0.426289	-0.164138	0.426289	0.0178874
0.0001207	299.113	282.879	28.1343	0.11957	0.110953	-16.3644	1.33531	0.426263	-0.164121	0.426263	0.0178724
0.0001208	299.109	282.891	28.1345	0.119585	0.110983	-17.7705	1.33529	0.426229	-0.164103	0.426229	0.0178491
0.0001209	299.104	282.911	28.1348	0.11961	0.111033	-19.1728	1.33527	0.426189	-0.164086	0.426189	0.0178176
0.000121	299.1	282.94	28.1352	0.119646	0.111104	-20.5714	1.33525	0.426143	-0.164067	0.426143	0.0177778
0.0001211	299.096	282.978	28.1357	0.119692	0.111195	-21.9663	1.33523	0.42609	-0.164049	0.42609	0.0177298
0.0001212	299.091	283.023	28.1363	0.119749	0.111307	-23.3574	1.33521	0.42603	-0.16403	0.42603	0.0176736
0.0001213	299.087	283.077	28.1371	0.119815	0.111438	-24.7448	1.33519	0.425964	-0.164011	0.425964	0.0176095
0.0001214	299.083	283.139	28.1379	0.119892	0.11159	-26.1284	1.33517	0.425892	-0.163991	0.425892	0.0175373
0.0001215	299.079	283.209	28.1388	0.119979	0.111763	-27.5083	1.33515	0.425813	-0.163972	0.425813	0.0174571
0.0001216	299.074	283.288	28.1398	0.120077	0.111955	-28.8843	1.33513	0.425727	-0.163951	0.425727	0.0173691
0.0001217	299.07	283.374	28.1409	0.120184	0.112167	-30.2566	1.33511	0.425635	-0.163931	0.425635	0.0172734
0.0001218	299.066	283.469	28.1421	0.120302	0.1124	-31.6251	1.3351	0.425537	-0.16391	0.425537	0.0171699
0.0001219	299.061	283.572	28.1434	0.12043	0.112652	-32.9898	1.33508	0.42543	-0.163889	0.42543	0.0170569
0.000122	299.057	283.685	28.1449	0.12057	0.112929	-34.3497	1.33506	0.425332	-0.163868	0.425332	0.0169545
0.0001221	299.053	283.788	28.1462	0.120697	0.11318	-31.2326	1.33504	0.425242	-0.163848	0.425242	0.0168618
0.0001222	299.049	283.881	28.1474	0.120812	0.113408	-28.1189	1.33502	0.425173	-0.163828	0.425173	0.0167965
0.0001223	299.044	283.946	28.1482	0.120893	0.113567	-23.5226	1.335	0.425127	-0.16381	0.425127	0.0167576
0.0001224	299.04	283.983	28.1487	0.120939	0.113659	-18.9371	1.33498	0.425121	-0.163794	0.425121	0.0167685
0.0001225	299.036	283.969	28.1486	0.120922	0.113624	-9.88269	1.33496	0.425183	-0.163781	0.425183	0.016862
0.0001226	299.031	283.869	28.1474	0.120798	0.11338	-7.50079	1.33494	0.425241	-0.163769	0.425241	0.0169509
0.0001227	299.027	283.775	28.1463	0.120681	0.113148	-3.71786	1.33492	0.425313	-0.163756	0.425313	0.0170577
0.0001228	299.023	283.662	28.145	0.120541	0.112872	-2.16766	1.3349	0.425378	-0.163744	0.425378	0.0171559
0.0001229	299.019	283.558	28.1438	0.120412	0.112618	-0.656578	1.33489	0.425434	-0.163731	0.425434	0.0172435
0.000123	299.014	283.466	28.1427	0.120297	0.112391	0.806822	1.33487	0.425484	-0.163718	0.425484	0.017324
0.0001231	299.01	283.381	28.1417	0.120192	0.112183	2.25486	1.33485	0.425528	-0.163704	0.425528	0.0173961
0.0001232	299.006	283.304	28.1408	0.120097	0.111996	3.69063	1.33483	0.425565	-0.16369	0.425565	0.017461
0.0001233	299.001	283.235	28.14	0.120012	0.111827	5.12463	1.33481	0.425596	-0.163676	0.425596	0.0175177
0.0001234	298.997	283.175	28.1393	0.119937	0.111679	6.55474	1.33479	0.42562	-0.163661	0.42562	0.017566
0.0001235	298.993	283.123	28.1387	0.119873	0.111552	7.98095	1.33477	0.425637	-0.163646	0.425637	0.0176061
0.0001236	298.989	283.08	28.1382	0.119819	0.111446	9.40326	1.33475	0.425648	-0.163631	0.425648	0.0176378
0.0001237	298.984	283.045	28.1379	0.119776	0.11136	10.8217	1.33473	0.425652	-0.163615	0.425652	0.0176611
0.0001238	298.98	283.019	28.1376	0.119743	0.111295	12.2361	1.33471	0.425656	-0.163606	0.425656	0.0176773
0.0001239	298.976	283	28.1374	0.119721	0.111251	13.6467	1.3347	0.425651	-0.163599	0.425651	0.0176786
0.00012396	298.973	282.998	28.1374	0.119718	0.111245	13.6467	1.33469	0.425639	-0.163583	0.425639	0.0176829
0.000124	298.971	282.991	28.1373	0.119709	0.111227	15.0533	1.33467	0.425622	-0.163566	0.425622	0.0176793
0.0001241	298.967	282.992	28.1374	0.11971	0.111229	16.455	1.33466	0.425599	-0.163549	0.425599	0.0176695
0.0001242	298.963	282.999	28.1375	0.119718	0.111247	17.8538	1.33464	0.42557	-0.163532	0.42557	0.0176514
0.0001243	298.959	283.014	28.1378	0.119737	0.111285	19.2486	1.33462	0.425534	-0.163515	0.425534	0.0176252
0.0001244	298.954	283.038	28.1381	0.119767	0.111343	20.6394	1.3346	0.425492	-0.163497	0.425492	0.0175908
0.0001245	298.95	283.07	28.1386	0.119807	0.111421	22.0263	1.33458	0.425442	-0.163478	0.425442	0.0175462
0.0001246	298.946	283.112	28.1391	0.119859	0.111525	23.4081	1.33456	0.425386	-0.16346	0.425386	0.0174956
0.0001247	298.941	283.161	28.1398	0.119919	0.111644	24.7871	1.33454	0.425324	-0.163441	0.425324	0.0174369
0.0001248	298.937	283.217	28.1405	0.119989	0.111782	26.162	1.33452	0.425256	-0.163421	0.425256	0.0173704
0.0001249	298.933	283.282	28.1414	0.12007	0.111942	27.5329	1.3345	0.425182	-0.163402	0.425182	0.0172959
0.000125	298.929	283.355	28.1423	0.120161	0.112121	28.8998	1.33448	0.4251	-0.163382	0.4251	0.0172137
0.0001251	298.924	283.437	28.1434	0.120261	0.11232	30.2627	1.33446	0.425013	-0.163362	0.425013	0.0171237
0.0001252	298.92	283.526	28.1445	0.120372	0.112539	31.6216	1.33445	0.424919	-0.163341	0.424919	0.017026
0.0001253	298.916	283.623	28.1457	0.120493	0.112777	32.9764	1.33443	0.424819	-0.16332	0.424819	0.0169209
0.0001254	298.911	283.729	28.1471	0.120624	0.113036	34.3273	1.33441	0.424712	-0.163299	0.424712	0.0168082
0.0001255	298.907	283.843	28.1485	0.120765	0.113314	35.6741	1.33439	0.424599	-0.163277	0.424599	0.0166882
0.0001256	298.903	283.964	28.1501	0.120916	0.113613	37.0168	1.33437	0.42448	-0.163255	0.42448	0.016561
0.0001257	298.899	284.094	28.1517	0.121077	0.11393	38.3556	1.33435	0.424354	-0.163233	0.424354	0.0164266
0.0001258	298.894	284.232	28.1535	0.121247	0.114268	39.6902	1.33433	0.424222	-0.163211	0.424222	0.0162851
0.0001259	298.89	284.377	28.1553	0.121428	0.114624	41.0208	1.33431	0.424083	-0.163188	0.424083	0.0161349
0.000126	298.886	284.533	28.1573	0.121621	0.115006	42.3464	1.33429	0.423951	-0.163165	0.423951	0.0159955
0.0001261	298.881	284.678	28.1591	0.1218	0.115361	39.1988	1.33427	0.423828	-0.163143	0.423828	0.0158659
0.0001262	298.877	284.813	28.1608	0.121968	0.115692	36.0549	1.33425	0.423727	-0.163122	0.423727	0.0157632
0.0001263	298.873	284.92	28.1622	0.1221	0.115953	31.4306	1.33423	0.423647	-0.163102	0.423647	0.0156864
0.0001264	298.869	284.999	28.1632	0.122199	0.116148	26.8178	1.33422	0.423589	-0.163084	0.423589	0.0156352
0.0001265	298.864	285.051	28.1639	0.122264	0.116275	22.2166	1.3342	0.423687	-0.163073	0.423687	0.0157681
0.0001266	298.86	284.906	28.1621	0.122083	0.11592	19.5923	1.33418	0.423774	-0.163061	0.423774	0.0158895
0.0001267	298.856	284.774	28.1606	0.121919	0.115595	17.0238	1.33416	0.423904	-0.163052	0.423904	0.0160624
0.0001268	298.851	284.587	28.1583	0.121688	0.115138	15.1435	1.33414	0.424026	-0.163043	0.424026	0.016226
0.0001269	298.847	284.411	28.1562	0.12147	0.114708	13.3106	1.33412	0.424139	-0.163032	0.424139	0.0163803
0.000127	298.843	284.246	28.1542	0.121265	0.114303	11.5238	1.3341	0.424245	-0.163022	0.424245	0.0165255
0.0001271	298.839	284.091	28.1524	0.121073	0.113924	9.78195	1.33408	0.424342	-0.163011	0.424342	0.0166617
0.0001272	298.834	283.947	28.1507	0.120894	0.113569	8.08399	1.33406	0.424431	-0.163	0.424431	0.0167888
0.0001273	298.83	283.812	28.1491	0.120726	0.113238	6.42881	1.33404	0.424513	-0.162988	0.424513	0.0169072
0.0001274	298.826	283.686	28.1476	0.120571	0.112932	4.81535	1.33402	0.424587	-0.162976	0.424587	0.0170168
0.0001275	298.821	283.57	28.1462	0.120427	0.112648	3.24257	1.33401	0.424654	-0.162964	0.424654	0.0171178
0.0001276	298.817	283.464	28.1449	0.120295	0.112386	1.70947	1.33399	0.424714	-0.162951	0.424714	0.0172103
0.0001277	298.813	283.366	28.1438	0.120174	0.112147	0.215051	1.33397	0.424766	-0.162938	0.424766	0.0172924
0.0001278	298.809	283.279	28.1428	0.120066	0.111934	-1.23226	1.33395	0.424818	-0.162931	0.424818	0.0173685
0.0001279	298.804	283.2	28.1419	0.119968	0.11174	-2.67192	1.33394	0.424813	-0.162924	0.424813	0.0173698
0.00012796	298.802	283.198	28.1419	0.119965	0.111734	-2.67192	1.33393	0.42485	-0.16291	0.42485	0.0174341
0.000128	298.8	283.129	28.141	0.11988	0.111567	-4.09966	1.33391	0.424881	-0.162896	0.424881	0.0174915
0.0001281	298.796	283.068	28.1403	0.119804	0.111417	-5.52736	1.33389	0.424908	-0.162882	0.424908	0.0175428
0.0001282	298.791	283.013	28.1397	0.119736	0.111282	-6.95237	1.33387	0.424927	-0.162867	0.424927	0.0175857
0.0001283	298.787	282.967	28.1392	0.119679	0.111169	-8.37373	1.33385	0.42494	-0.162852	0.42494	0.0176204
0.0001284	298.783	282.929	28.1388	0.119632	0.111076	-9.79145	1.33383	0.424946	-0.162836	0.424946	0.0176468
0.0001285	298.779	282.899	28.1385	0.119595	0.111004	-11.2055	1.33381	0.424944	-0.16282	0.424944	0.0176627
0.0001286	298.774	282.88	28.1383	0.119572	0.110957	-12.615	1.33379	0.424937	-0.162804	0.424937	0.0176725
0.0001287	298.77	282.868	28.1382	0.119556	0.110926	-14.0218	1.33378	0.424924	-0.162788	0.424924	0.017674
0.0001288	298.766	282.863	28.1382	0.119551	0.110915	-15.4249	1.33376	0.424903	-0.162771	0.424903	0.0176672
0.0001289	298.761	282.867	28.1383	0.119556	0.110925	-16.8242	1.33374	0.424877	-0.162754	0.424877	0.0176522
0.000129	298.757	282.88	28.1385	0.119571	0.110955	-18.2199	1.33372	0.424843	-0.162736	0.424843	0.017629
0.0001291	298.753	282.9	28.1388	0.119596	0.111006	-19.6119	1.3337	0.424804	-0.162718	0.424804	0.0175976
0.0001292	298.749	282.929	28.1392	0.119632	0.111077	-21.0002	1.33368	0.424757	-0.1627	0.424757	0.0175581
0.0001293	298.744	282.966	28.1397	0.119678	0.111168	-22.3848	1.33366	0.424705	-0.162682	0.424705	0.0175105
0.0001294	298.74	283.012	28.1403	0.119735	0.111279	-23.7656	1.33364	0.424645	-0.162663	0.424645	0.0174549
0.0001295	298.736	283.065	28.141	0.119801	0.11141	-25.1428	1.33362	0.42458	-0.162644	0.42458	0.0173914
0.0001296	298.731	283.127	28.1418	0.119878	0.111562	-26.5161	1.3336	0.424508	-0.162624	0.424508	0.0173199
0.0001297	298.727	283.197	28.1427	0.119965	0.111733	-27.8858	1.33358	0.424429	-0.162604	0.424429	0.0172406
0.0001298	298.723	283.275	28.1437	0.120062	0.111925	-29.2516	1.33356	0.424344	-0.162584	0.424344	0.0171535
0.0001299	298.719	283.362	28.1448	0.120169	0.112136	-30.6137	1.33355	0.424251	-0.162564	0.424251	0.0170569
0.00013	298.714	283.458	28.1461	0.120288	0.112373	-31.9711	1.33353	0.424167	-0.162543	0.424167	0.0169707
0.0001301	298.71	283.544	28.1472	0.120395	0.112583	-28.8562	1.33351	0.42409	-0.162524	0.42409	0.016894
0.0001302	298.706	283.62	28.1482	0.120489	0.11277	-25.7449	1.33349	0.424035	-0.162505	0.424035	0.0168447
0.0001303	298.701	283.669	28.1488	0.120549	0.112888	-21.1526	1.33347	0.424001	-0.162488	0.424001	0.0168217
0.0001304	298.697	283.689	28.1491	0.120575	0.112939	-16.5711	1.33345	0.423989	-0.162471	0.423989	0.0168249
0.0001305	298.693	283.683	28.1491	0.120567	0.112924	-12.0003	1.33343	0.424064	-0.162459	0.424064	0.016935
0.0001306	298.689	283.567	28.1477	0.120423	0.112638	-9.57753	1.33341	0.424129	-0.162447	0.424129	0.0170338
0.0001307	298.684	283.462	28.1465	0.120293	0.112382	-7.20707	1.33339	0.424215	-0.162435	0.424215	0.0171584
0.0001308	298.68	283.331	28.1449	0.120131	0.112061	-5.57684	1.33337	0.424294	-0.162423	0.424294	0.0172742
0.0001309	298.676	283.21	28.1435	0.11998	0.111764	-3.98772	1.33335	0.424365	-0.162411	0.424365	0.0173813
0.000131	298.671	283.098	28.1421	0.119841	0.111489	-2.43869	1.33334	0.424429	-0.162399	0.424429	0.0174798
0.0001311	298.667	282.995	28.1409	0.119713	0.111237	-0.928756	1.33332	0.424484	-0.162386	0.424484	0.0175676
0.0001312	298.663	282.903	28.1398	0.119599	0.111012	0.533615	1.3333	0.424534	-0.162372	0.424534	0.0176482
0.0001313	298.659	282.818	28.1389	0.119495	0.110805	1.97587	1.33328	0.424576	-0.162359	0.424576	0.0177205
0.0001314	298.654	282.742	28.138	0.119401	0.110619	3.40591	1.33326	0.424613	-0.162345	0.424613	0.0177856
0.0001315	298.65	282.674	28.1372	0.119316	0.110451	4.8326	1.33324	0.424643	-0.16233	0.424643	0.0178423
0.0001316	298.646	282.614	28.1365	0.119241	0.110304	6.25543	1.33322	0.424667	-0.162316	0.424667	0.0178907
0.0001317	298.641	282.563	28.1359	0.119178	0.110178	7.67439	1.3332	0.424684	-0.162301	0.424684	0.0179308
0.0001318	298.637	282.519	28.1354	0.119124	0.110073	9.08946	1.33318	0.424701	-0.162292	0.424701	0.0179637
0.0001319	298.633	282.485	28.1351	0.119081	0.109988	10.5007	1.33317	0.424696	-0.162286	0.424696	0.017965
0.00013196	298.63	282.482	28.1351	0.119078	0.109982	10.5007	1.33316	0.424697	-0.16227	0.424697	0.0179859
0.000132	298.629	282.459	28.1348	0.119049	0.109923	11.9079	1.33314	0.424693	-0.162254	0.424693	0.0179989
0.0001321	298.624	282.443	28.1346	0.119029	0.109885	13.3104	1.33312	0.424683	-0.162238	0.424683	0.0180056
0.0001322	298.62	282.433	28.1346	0.119017	0.109861	14.7099	1.33311	0.424667	-0.162221	0.424667	0.018004
0.0001323	298.616	282.432	28.1346	0.119016	0.109858	16.1054	1.33309	0.424645	-0.162204	0.424645	0.0179941
0.0001324	298.611	282.439	28.1348	0.119024	0.109876	17.4971	1.33307	0.424614	-0.162187	0.424614	0.0179738
0.0001325	298.607	282.456	28.135	0.119046	0.109918	18.8848	1.33305	0.424578	-0.162169	0.424578	0.0179464
0.0001326	298.603	282.481	28.1354	0.119077	0.109979	20.2676	1.33303	0.424535	-0.162151	0.424535	0.0179108
0.0001327	298.599	282.514	28.1358	0.119117	0.110059	21.6475	1.33301	0.424486	-0.162133	0.424486	0.0178681
0.0001328	298.594	282.554	28.1364	0.119167	0.110157	23.0233	1.33299	0.424431	-0.162114	0.424431	0.0178173
0.0001329	298.59	282.602	28.137	0.119227	0.110276	24.3953	1.33297	0.42437	-0.162095	0.42437	0.0177584
0.000133	298.586	282.659	28.1377	0.119297	0.110414	25.7632	1.33295	0.424302	-0.162076	0.424302	0.0176916
0.0001331	298.581	282.723	28.1386	0.119377	0.110572	27.1272	1.33293	0.424228	-0.162056	0.424228	0.0176168
0.0001332	298.577	282.796	28.1395	0.119467	0.11075	28.4872	1.33291	0.424148	-0.162036	0.424148	0.0175343
0.0001333	298.573	282.877	28.1406	0.119567	0.110948	29.8432	1.3329	0.424061	-0.162016	0.424061	0.017444
0.0001334	298.569	282.966	28.1417	0.119677	0.111166	31.1953	1.33288	0.423968	-0.161996	0.423968	0.017346
0.0001335	298.564	283.063	28.143	0.119798	0.111403	32.5433	1.33286	0.423868	-0.161975	0.423868	0.0172404
0.0001336	298.56	283.168	28.1443	0.119928	0.111661	33.8874	1.33284	0.423762	-0.161954	0.423762	0.0171274
0.0001337	298.556	283.281	28.1457	0.120068	0.111937	35.2274	1.33282	0.42365	-0.161932	0.42365	0.0170069
0.0001338	298.551	283.402	28.1473	0.120218	0.112234	36.5634	1.3328	0.423531	-0.16191	0.423531	0.0168773
0.0001339	298.547	283.533	28.1489	0.12038	0.112555	37.8954	1.33278	0.423406	-0.161888	0.423406	0.0167424
0.000134	298.543	283.669	28.1507	0.12055	0.11289	39.2223	1.33276	0.423288	-0.161866	0.423288	0.0166154
0.0001341	298.539	283.799	28.1523	0.12071	0.113207	36.0809	1.33274	0.423178	-0.161845	0.423178	0.0165001
0.0001342	298.534	283.916	28.1538	0.120856	0.113495	32.9433	1.33272	0.423091	-0.161824	0.423091	0.0164113
0.0001343	298.53	284.006	28.1549	0.120968	0.113716	28.3267	1.3327	0.423024	-0.161805	0.423024	0.0163486
0.0001344	298.526	284.069	28.1558	0.121046	0.11387	23.7217	1.33268	0.422998	-0.161788	0.422998	0.0163351
0.0001345	298.521	284.081	28.156	0.12106	0.113898	19.1283	1.33267	0.423069	-0.161776	0.423069	0.0164391
0.0001346	298.517	283.969	28.1546	0.120921	0.113623	16.5694	1.33265	0.423136	-0.161764	0.423136	0.0165384
0.0001347	298.513	283.862	28.1534	0.120789	0.113362	14.0651	1.33263	0.423227	-0.161752	0.423227	0.0166672
0.0001348	298.509	283.725	28.1517	0.120619	0.113026	12.2666	1.33261	0.42331	-0.161741	0.42331	0.0167873
0.0001349	298.504	283.597	28.1502	0.120461	0.112713	10.5134	1.33259	0.423386	-0.161729	0.423386	0.0168986
0.000135	298.5	283.479	28.1488	0.120314	0.112424	8.80426	1.33257	0.423454	-0.161716	0.423454	0.0170014
0.0001351	298.496	283.37	28.1475	0.120179	0.112157	7.13821	1.33255	0.423516	-0.161704	0.423516	0.0170958
0.0001352	298.491	283.27	28.1464	0.120055	0.111912	5.51416	1.33253	0.423568	-0.161691	0.423568	0.0171797
0.0001353	298.487	283.181	28.1453	0.119945	0.111694	3.93104	1.33251	0.423615	-0.161677	0.423615	0.0172566
0.0001354	298.483	283.1	28.1444	0.119844	0.111495	2.38785	1.33249	0.423656	-0.161663	0.423656	0.0173253
0.0001355	298.479	283.027	28.1435	0.119753	0.111316	0.8836	1.33247	0.42369	-0.161649	0.42369	0.0173869
0.0001356	298.474	282.961	28.1428	0.119672	0.111155	-0.573345	1.33246	0.423718	-0.161635	0.423718	0.0174403
0.0001357	298.47	282.904	28.1421	0.119601	0.111015	-2.01112	1.33244	0.423739	-0.16162	0.423739	0.0174854
0.0001358	298.466	282.855	28.1416	0.11954	0.110895	-3.43694	1.33242	0.423761	-0.161612	0.423761	0.0175235
0.0001359	298.461	282.815	28.1411	0.11949	0.110796	-4.85986	1.33241	0.423756	-0.161605	0.423756	0.0175248
0.00013596	298.459	282.812	28.1411	0.119487	0.11079	-4.85986	1.3324	0.423762	-0.16159	0.423762	0.0175511
0.000136	298.457	282.783	28.1408	0.119451	0.110718	-6.27918	1.33238	0.423762	-0.161574	0.423762	0.0175695
0.0001361	298.453	282.761	28.1406	0.119424	0.110665	-7.69399	1.33236	0.423757	-0.161558	0.423757	0.0175818
0.0001362	298.449	282.746	28.1404	0.119405	0.110628	-9.1061	1.33234	0.423745	-0.161542	0.423745	0.0175858
0.0001363	298.444	282.739	28.1404	0.119396	0.110611	-10.5146	1.33232	0.423727	-0.161525	0.423727	0.0175817
0.0001364	298.44	282.74	28.1404	0.119398	0.110614	-11.9194	1.3323	0.423703	-0.161508	0.423703	0.0175694
0.0001365	298.436	282.75	28.1406	0.11941	0.110638	-13.3206	1.33228	0.42367	-0.16149	0.42367	0.0175469
0.0001366	298.431	282.77	28.1409	0.119435	0.110687	-14.7172	1.33226	0.423632	-0.161473	0.423632	0.0175183
0.0001367	298.427	282.796	28.1413	0.119467	0.110751	-16.1111	1.33224	0.423588	-0.161454	0.423588	0.0174817
0.0001368	298.423	282.831	28.1418	0.11951	0.110835	-17.5013	1.33223	0.423538	-0.161436	0.423538	0.017437
0.0001369	298.419	282.873	28.1423	0.119563	0.110939	-18.8879	1.33221	0.423481	-0.161417	0.423481	0.0173844
0.000137	298.414	282.924	28.143	0.119626	0.111063	-20.2707	1.33219	0.423418	-0.161398	0.423418	0.0173239
0.0001371	298.41	282.983	28.1438	0.119699	0.111208	-21.6499	1.33217	0.423349	-0.161379	0.423349	0.0172555
0.0001372	298.406	283.05	28.1446	0.119782	0.111372	-23.0253	1.33215	0.423273	-0.161359	0.423273	0.0171793
0.0001373	298.401	283.125	28.1456	0.119875	0.111556	-24.3971	1.33213	0.42319	-0.161339	0.42319	0.0170954
0.0001374	298.397	283.208	28.1467	0.119978	0.11176	-25.7651	1.33211	0.423102	-0.161319	0.423102	0.0170039
0.0001375	298.393	283.299	28.1479	0.120091	0.111984	-27.1294	1.33209	0.423007	-0.161298	0.423007	0.0169049
0.0001376	298.389	283.399	28.1491	0.120214	0.112227	-28.49	1.33207	0.422906	-0.161277	0.422906	0.0167983
0.0001377	298.384	283.506	28.1505	0.120348	0.11249	-29.8468	1.33205	0.422799	-0.161256	0.422799	0.0166844
0.0001378	298.38	283.622	28.152	0.120491	0.112773	-31.1999	1.33203	0.422685	-0.161234	0.422685	0.0165633
0.0001379	298.376	283.745	28.1535	0.120644	0.113075	-32.5492	1.33202	0.422565	-0.161213	0.422565	0.016435
0.000138	298.371	283.876	28.1552	0.120807	0.113397	-33.8938	1.332	0.422451	-0.161191	0.422451	0.0163145
0.0001381	298.367	284	28.1568	0.12096	0.1137	-30.7716	1.33198	0.422346	-0.16117	0.422346	0.0162054
0.0001382	298.363	284.112	28.1582	0.121099	0.113975	-27.6529	1.33196	0.422263	-0.16115	0.422263	0.0161225
0.0001383	298.359	284.197	28.1593	0.121204	0.114182	-23.055	1.33194	0.422201	-0.161131	0.422201	0.0160654
0.0001384	298.354	284.254	28.1601	0.121276	0.114323	-18.4679	1.33192	0.42216	-0.161113	0.42216	0.016034
0.0001385	298.35	284.285	28.1605	0.121313	0.114398	-13.8916	1.3319	0.422249	-0.161101	0.422249	0.0161583
0.0001386	298.346	284.15	28.1589	0.121147	0.114069	-11.4375	1.33188	0.422327	-0.16109	0.422327	0.0162712
0.0001387	298.341	284.028	28.1574	0.120995	0.11377	-9.03636	1.33186	0.42244	-0.16108	0.42244	0.0164263
0.0001388	298.337	283.863	28.1554	0.12079	0.113364	-7.36768	1.33184	0.422545	-0.161069	0.422545	0.0165722
0.0001389	298.333	283.707	28.1536	0.120597	0.112983	-5.74105	1.33182	0.422642	-0.161058	0.422642	0.0167092
0.000139	298.329	283.562	28.1518	0.120417	0.112626	-4.15545	1.3318	0.422731	-0.161047	0.422731	0.0168372
0.0001391	298.324	283.426	28.1502	0.120248	0.112294	-2.60984	1.33179	0.422813	-0.161035	0.422813	0.0169565
0.0001392	298.32	283.3	28.1487	0.120092	0.111985	-1.10325	1.33177	0.422887	-0.161023	0.422887	0.017067
0.0001393	298.316	283.183	28.1473	0.119947	0.111699	0.355944	1.33175	0.422954	-0.161011	0.422954	0.017169
0.0001394	298.311	283.076	28.1461	0.119814	0.111435	1.79194	1.33173	0.423015	-0.160998	0.423015	0.0172626
0.0001395	298.307	282.977	28.1449	0.119691	0.111194	3.21578	1.33171	0.423066	-0.160985	0.423066	0.0173458
0.0001396	298.303	282.889	28.1439	0.119583	0.110978	4.63524	1.33169	0.423112	-0.160972	0.423112	0.0174219
0.0001397	298.299	282.809	28.1429	0.119483	0.110781	6.05086	1.33167	0.423151	-0.160958	0.423151	0.0174898
0.0001398	298.294	282.737	28.1421	0.119394	0.110605	7.46263	1.33165	0.423192	-0.16095	0.423192	0.0175517
0.0001399	298.29	282.672	28.1414	0.119314	0.110447	8.87054	1.33164	0.423187	-0.160944	0.423187	0.017553
0.00013996	298.287	282.67	28.1414	0.119311	0.110441	8.87054	1.33163	0.423212	-0.160929	0.423212	0.0176032
0.00014	298.286	282.616	28.1407	0.119244	0.110309	10.2746	1.33161	0.423231	-0.160914	0.423231	0.0176455
0.0001401	298.281	282.57	28.1402	0.119187	0.110198	11.6738	1.33159	0.423244	-0.160899	0.423244	0.0176816
0.0001402	298.277	282.531	28.1398	0.119139	0.110101	13.0701	1.33158	0.423252	-0.160884	0.423252	0.0177096
0.0001403	298.273	282.5	28.1394	0.1191	0.110025	14.4625	1.33156	0.423252	-0.160868	0.423252	0.0177292
0.0001404	298.269	282.477	28.1392	0.119072	0.109969	15.8511	1.33154	0.423245	-0.160852	0.423245	0.0177386
0.0001405	298.264	282.465	28.1391	0.119057	0.109939	17.2357	1.33152	0.423232	-0.160835	0.423232	0.0177409
0.0001406	298.26	282.46	28.1391	0.11905	0.109927	18.6154	1.3315	0.423212	-0.160819	0.423212	0.0177349
0.0001407	298.256	282.463	28.1392	0.119054	0.109934	19.9922	1.33148	0.423187	-0.160802	0.423187	0.0177218
0.0001408	298.251	282.473	28.1394	0.119067	0.10996	21.3651	1.33146	0.423156	-0.160784	0.423156	0.0177006
0.0001409	298.247	282.492	28.1396	0.11909	0.110005	22.734	1.33144	0.423118	-0.160766	0.423118	0.0176713
0.000141	298.243	282.519	28.14	0.119123	0.110071	24.099	1.33142	0.423073	-0.160748	0.423073	0.0176339
0.0001411	298.239	282.554	28.1405	0.119167	0.110156	25.4601	1.3314	0.423023	-0.16073	0.423023	0.0175886
0.0001412	298.234	282.597	28.1411	0.11922	0.110262	26.8172	1.33138	0.422966	-0.160711	0.422966	0.0175352
0.0001413	298.23	282.648	28.1418	0.119283	0.110388	28.1704	1.33136	0.422902	-0.160692	0.422902	0.017474
0.0001414	298.226	282.707	28.1425	0.119357	0.110533	29.5196	1.33135	0.422833	-0.160673	0.422833	0.0174049
0.0001415	298.221	282.775	28.1434	0.119441	0.110698	30.8648	1.33133	0.422756	-0.160653	0.422756	0.0173281
0.0001416	298.217	282.85	28.1444	0.119534	0.110883	32.2061	1.33131	0.422674	-0.160633	0.422674	0.0172436
0.0001417	298.213	282.934	28.1455	0.119638	0.111088	33.5434	1.33129	0.422584	-0.160613	0.422584	0.0171496
0.0001418	298.209	283.027	28.1467	0.119754	0.111317	34.8767	1.33127	0.422489	-0.160592	0.422489	0.017049
0.0001419	298.204	283.128	28.148	0.119878	0.111563	36.206	1.33125	0.422387	-0.160571	0.422387	0.0169409
0.000142	298.2	283.236	28.1493	0.120013	0.111829	37.5303	1.33123	0.422292	-0.16055	0.422292	0.0168416
0.0001421	298.196	283.336	28.1506	0.120137	0.112073	34.3911	1.33121	0.422206	-0.16053	0.422206	0.0167538
0.0001422	298.191	283.424	28.1518	0.120246	0.11229	31.2558	1.33119	0.422141	-0.160511	0.422141	0.0166923
0.0001423	298.187	283.485	28.1526	0.120322	0.112439	26.6432	1.33117	0.422098	-0.160493	0.422098	0.016657
0.0001424	298.183	283.519	28.153	0.120364	0.112522	22.0421	1.33115	0.422094	-0.160477	0.422094	0.0166711
0.0001425	298.179	283.502	28.1529	0.120342	0.112479	17.4527	1.33114	0.422154	-0.160464	0.422154	0.0167626
0.0001426	298.174	283.404	28.1517	0.120221	0.112239	14.9317	1.33112	0.422209	-0.160451	0.422209	0.0168494
0.0001427	298.17	283.311	28.1506	0.120106	0.112012	12.4647	1.3311	0.422278	-0.160439	0.422278	0.0169526
0.0001428	298.166	283.201	28.1493	0.11997	0.111744	10.7137	1.33108	0.42234	-0.160426	0.42234	0.0170474
0.0001429	298.161	283.101	28.1481	0.119845	0.111497	9.0069	1.33106	0.422393	-0.160413	0.422393	0.0171319
0.000143	298.157	283.011	28.1471	0.119734	0.111277	7.34306	1.33104	0.42244	-0.1604	0.42244	0.0172093
0.0001431	298.153	282.929	28.1461	0.119632	0.111076	5.72114	1.33102	0.42248	-0.160386	0.42248	0.0172787
0.0001432	298.149	282.855	28.1453	0.11954	0.110895	4.14012	1.331	0.422515	-0.160372	0.422515	0.0173409
0.0001433	298.144	282.789	28.1445	0.119458	0.110732	2.59896	1.33098	0.422544	-0.160358	0.422544	0.0173951
0.0001434	298.14	282.731	28.1438	0.119386	0.11059	1.09668	1.33096	0.422565	-0.160343	0.422565	0.0174411
0.0001435	298.136	282.681	28.1433	0.119324	0.110468	-0.35838	1.33094	0.422581	-0.160328	0.422581	0.0174789
0.0001436	298.131	282.64	28.1428	0.119273	0.110367	-1.79054	1.33092	0.422589	-0.160312	0.422589	0.0175085
0.0001437	298.127	282.607	28.1424	0.119232	0.110286	-3.21078	1.33091	0.422592	-0.160297	0.422592	0.01753
0.0001438	298.123	282.582	28.1422	0.119202	0.110226	-4.62688	1.33089	0.422594	-0.160287	0.422594	0.0175445
0.0001439	298.119	282.566	28.142	0.119181	0.110186	-6.03941	1.33087	0.422589	-0.160281	0.422589	0.0175457
0.00014396	298.116	282.563	28.142	0.119178	0.11018	-6.03941	1.33087	0.422577	-0.160264	0.422577	0.0175485
0.000144	298.114	282.558	28.142	0.119171	0.110166	-7.44834	1.33085	0.422558	-0.160248	0.422558	0.0175435
0.0001441	298.11	282.56	28.1421	0.119174	0.110171	-8.85278	1.33083	0.422534	-0.160231	0.422534	0.0175324
0.0001442	298.106	282.568	28.1422	0.119185	0.110192	-10.2545	1.33081	0.422504	-0.160213	0.422504	0.0175132
0.0001443	298.101	282.585	28.1425	0.119205	0.110233	-11.6527	1.33079	0.422468	-0.160196	0.422468	0.017486
0.0001444	298.097	282.61	28.1428	0.119236	0.110294	-13.0472	1.33077	0.422425	-0.160178	0.422425	0.0174508
0.0001445	298.093	282.643	28.1433	0.119277	0.110374	-14.438	1.33075	0.422374	-0.160159	0.422374	0.0174056
0.0001446	298.089	282.686	28.1439	0.11933	0.11048	-15.8243	1.33073	0.422319	-0.160141	0.422319	0.0173544
0.0001447	298.084	282.735	28.1445	0.119391	0.110601	-17.2079	1.33071	0.422257	-0.160122	0.422257	0.0172955
0.0001448	298.08	282.792	28.1453	0.119463	0.110741	-18.5879	1.3307	0.422189	-0.160102	0.422189	0.0172287
0.0001449	298.076	282.858	28.1461	0.119544	0.110902	-19.9641	1.33068	0.422115	-0.160083	0.422115	0.0171541
0.000145	298.071	282.931	28.1471	0.119635	0.111082	-21.3367	1.33066	0.422034	-0.160063	0.422034	0.017072
0.0001451	298.067	283.013	28.1481	0.119736	0.111282	-22.7056	1.33064	0.421947	-0.160042	0.421947	0.0169822
0.0001452	298.063	283.103	28.1493	0.119847	0.111501	-24.0708	1.33062	0.421854	-0.160022	0.421854	0.0168849
0.0001453	298.059	283.2	28.1505	0.119968	0.11174	-25.4324	1.3306	0.421755	-0.160001	0.421755	0.0167802
0.0001454	298.054	283.306	28.1519	0.120099	0.111999	-26.7902	1.33058	0.421649	-0.15998	0.421649	0.0166682
0.0001455	298.05	283.419	28.1533	0.12024	0.112277	-28.1443	1.33056	0.421537	-0.159958	0.421537	0.0165489
0.0001456	298.046	283.541	28.1549	0.120391	0.112575	-29.4947	1.33054	0.42142	-0.159936	0.42142	0.0164225
0.0001457	298.041	283.67	28.1565	0.120551	0.112892	-30.8413	1.33052	0.421295	-0.159914	0.421295	0.0162891
0.0001458	298.037	283.808	28.1583	0.120722	0.113229	-32.1842	1.3305	0.421165	-0.159892	0.421165	0.0161488
0.0001459	298.033	283.953	28.1601	0.120902	0.113585	-33.5234	1.33048	0.421029	-0.159869	0.421029	0.0160017
0.000146	298.029	284.106	28.162	0.121091	0.11396	-34.8579	1.33047	0.420899	-0.159847	0.420899	0.0158625
0.0001461	298.024	284.251	28.1639	0.121272	0.114316	-31.7308	1.33045	0.420778	-0.159824	0.420778	0.0157349
0.0001462	298.02	284.385	28.1656	0.121437	0.114643	-28.6072	1.33043	0.420678	-0.159804	0.420678	0.0156331
0.0001463	298.016	284.491	28.1669	0.121569	0.114904	-24.0063	1.33041	0.420599	-0.159784	0.420599	0.0155569
0.0001464	298.011	284.57	28.168	0.121667	0.115098	-19.4161	1.33039	0.420542	-0.159765	0.420542	0.0155061
0.0001465	298.007	284.622	28.1686	0.121732	0.115225	-14.8366	1.33037	0.420638	-0.159754	0.420638	0.015638
0.0001466	298.003	284.477	28.1669	0.121552	0.11487	-12.3697	1.33035	0.420724	-0.159743	0.420724	0.0157586
0.0001467	297.999	284.345	28.1653	0.121388	0.114546	-9.95579	1.33033	0.420852	-0.159733	0.420852	0.0159304
0.0001468	297.994	284.159	28.1631	0.121157	0.11409	-8.27144	1.33031	0.420972	-0.159724	0.420972	0.016093
0.0001469	297.99	283.983	28.161	0.120939	0.113659	-6.62955	1.33029	0.421084	-0.159714	0.421084	0.0162466
0.000147	297.986	283.818	28.159	0.120735	0.113255	-5.02904	1.33027	0.421187	-0.159703	0.421187	0.0163911
0.0001471	297.981	283.663	28.1571	0.120543	0.112875	-3.46891	1.33026	0.421283	-0.159692	0.421283	0.0165268
0.0001472	297.977	283.518	28.1554	0.120363	0.11252	-1.94813	1.33024	0.421372	-0.159681	0.421372	0.0166537
0.0001473	297.973	283.383	28.1538	0.120195	0.112189	-0.465744	1.33022	0.421453	-0.159669	0.421453	0.0167719
0.0001474	297.969	283.257	28.1523	0.120039	0.111881	0.969823	1.3302	0.421526	-0.159657	0.421526	0.0168815
0.0001475	297.964	283.141	28.1509	0.119895	0.111595	2.39301	1.33018	0.421593	-0.159645	0.421593	0.0169827
0.0001476	297.96	283.034	28.1497	0.119762	0.111332	3.80415	1.33016	0.421653	-0.159632	0.421653	0.0170756
0.0001477	297.956	282.935	28.1485	0.11964	0.111091	5.21443	1.33014	0.421704	-0.159619	0.421704	0.0171582
0.0001478	297.951	282.847	28.1475	0.119531	0.110876	6.62089	1.33012	0.421756	-0.159612	0.421756	0.0172349
0.0001479	297.947	282.767	28.1465	0.119431	0.110679	8.02352	1.33011	0.421751	-0.159606	0.421751	0.0172361
0.00014796	297.945	282.765	28.1465	0.119428	0.110673	8.02352	1.3301	0.421788	-0.159592	0.421788	0.0173013
0.000148	297.943	282.695	28.1457	0.119342	0.110503	9.42231	1.33008	0.42182	-0.159578	0.42182	0.0173597
0.0001481	297.939	282.633	28.145	0.119265	0.11035	10.8163	1.33006	0.421847	-0.159563	0.421847	0.0174121
0.0001482	297.934	282.576	28.1443	0.119195	0.110212	12.2074	1.33004	0.421867	-0.159548	0.421867	0.0174563
0.0001483	297.93	282.529	28.1438	0.119135	0.110095	13.5946	1.33003	0.421881	-0.159533	0.421881	0.0174924
0.0001484	297.926	282.489	28.1433	0.119086	0.109998	14.978	1.33001	0.421887	-0.159518	0.421887	0.0175184
0.0001485	297.921	282.46	28.143	0.11905	0.109926	16.3575	1.32999	0.421887	-0.159502	0.421887	0.0175373
0.0001486	297.917	282.438	28.1428	0.119023	0.109873	17.7321	1.32997	0.42188	-0.159486	0.42188	0.017548
0.0001487	297.913	282.424	28.1427	0.119006	0.109839	19.1038	1.32995	0.421869	-0.159469	0.421869	0.0175517
0.0001488	297.909	282.417	28.1427	0.118998	0.109823	20.4716	1.32993	0.42185	-0.159453	0.42185	0.0175472
0.0001489	297.904	282.419	28.1427	0.119	0.109827	21.8355	1.32991	0.421826	-0.159436	0.421826	0.0175347
0.000149	297.9	282.429	28.1429	0.119012	0.109851	23.1955	1.32989	0.421794	-0.159418	0.421794	0.0175142
0.0001491	297.896	282.447	28.1432	0.119034	0.109895	24.5516	1.32987	0.421757	-0.1594	0.421757	0.0174856
0.0001492	297.891	282.473	28.1436	0.119067	0.109959	25.9038	1.32985	0.421713	-0.159382	0.421713	0.0174491
0.0001493	297.887	282.507	28.144	0.119109	0.110043	27.252	1.32983	0.421663	-0.159364	0.421663	0.0174047
0.0001494	297.883	282.55	28.1446	0.119162	0.110147	28.5963	1.32981	0.421607	-0.159345	0.421607	0.0173525
0.0001495	297.879	282.6	28.1453	0.119224	0.11027	29.9367	1.3298	0.421545	-0.159326	0.421545	0.0172924
0.0001496	297.874	282.659	28.146	0.119297	0.110414	31.2731	1.32978	0.421476	-0.159307	0.421476	0.0172246
0.0001497	297.87	282.725	28.1469	0.119379	0.110577	32.6055	1.32976	0.421399	-0.159287	0.421399	0.0171472
0.0001498	297.866	282.802	28.1479	0.119474	0.110764	33.934	1.32974	0.421318	-0.159267	0.421318	0.0170641
0.0001499	297.861	282.884	28.149	0.119576	0.110966	35.2585	1.32972	0.421231	-0.159247	0.421231	0.0169735
0.00015	297.857	282.975	28.1501	0.119689	0.111188	36.578	1.3297	0.421149	-0.159227	0.421149	0.0168906
0.0001501	297.853	283.058	28.1512	0.119791	0.111391	33.4392	1.32968	0.421077	-0.159207	0.421077	0.016819
0.0001502	297.849	283.129	28.1521	0.11988	0.111566	30.3041	1.32966	0.421026	-0.159189	0.421026	0.0167737
0.0001503	297.844	283.173	28.1527	0.119934	0.111674	25.6935	1.32964	0.421014	-0.159173	0.421014	0.0167779
0.0001504	297.84	283.166	28.1527	0.119925	0.111656	21.0944	1.32962	0.421038	-0.159158	0.421038	0.016826
0.0001505	297.836	283.113	28.1521	0.11986	0.111527	12.0472	1.3296	0.421084	-0.159145	0.421084	0.0169008
0.0001506	297.831	283.033	28.1511	0.119761	0.11133	9.64206	1.32959	0.421119	-0.159131	0.421119	0.0169636
0.0001507	297.827	282.965	28.1504	0.119676	0.111164	5.84289	1.32957	0.421148	-0.159116	0.421148	0.0170185
0.0001508	297.823	282.906	28.1497	0.119603	0.111018	4.26682	1.32955	0.421171	-0.159102	0.421171	0.0170653
0.0001509	297.819	282.854	28.1491	0.119539	0.110893	2.7305	1.32953	0.421187	-0.159087	0.421187	0.0171042
0.000151	297.814	282.812	28.1486	0.119486	0.110789	1.23293	1.32951	0.421197	-0.159071	0.421197	0.017135
0.0001511	297.81	282.777	28.1482	0.119444	0.110704	-0.217593	1.32949	0.421201	-0.159056	0.421201	0.0171577
0.0001512	297.806	282.751	28.148	0.119411	0.11064	-1.64278	1.32947	0.421198	-0.15904	0.421198	0.0171725
0.0001513	297.801	282.733	28.1478	0.119389	0.110596	-3.05611	1.32945	0.421188	-0.159023	0.421188	0.0171792
0.0001514	297.797	282.723	28.1477	0.119377	0.110572	-4.46448	1.32943	0.421172	-0.159007	0.421172	0.0171779
0.0001515	297.793	282.722	28.1478	0.119375	0.110568	-5.8693	1.32941	0.42115	-0.15899	0.42115	0.0171686
0.0001516	297.789	282.728	28.1479	0.119383	0.110584	-7.27055	1.32939	0.421122	-0.158973	0.421122	0.0171514
0.0001517	297.784	282.743	28.1481	0.119401	0.110621	-8.66823	1.32937	0.421087	-0.158955	0.421087	0.0171263
0.0001518	297.78	282.766	28.1485	0.11943	0.110677	-10.0623	1.32936	0.421052	-0.158944	0.421052	0.0170944
0.0001519	297.776	282.797	28.1489	0.119469	0.110753	-11.4528	1.32934	0.421047	-0.158937	0.421047	0.0170956
0.00015196	297.773	282.795	28.1489	0.119465	0.110747	-11.4528	1.32934	0.420998	-0.158919	0.420998	0.0170524
0.000152	297.771	282.836	28.1494	0.119517	0.110849	-12.8397	1.32932	0.420943	-0.1589	0.420943	0.0170017
0.0001521	297.767	282.886	28.1501	0.119578	0.11097	-14.2221	1.3293	0.420883	-0.158881	0.420883	0.0169453
0.0001522	297.763	282.941	28.1508	0.119647	0.111106	-15.6018	1.32928	0.420817	-0.158862	0.420817	0.0168813
0.0001523	297.759	283.004	28.1516	0.119725	0.111261	-16.9779	1.32926	0.420744	-0.158843	0.420744	0.0168096
0.0001524	297.754	283.076	28.1526	0.119814	0.111436	-18.3503	1.32924	0.420665	-0.158823	0.420665	0.0167303
0.0001525	297.75	283.155	28.1536	0.119912	0.11163	-19.7191	1.32922	0.420579	-0.158802	0.420579	0.0166417
0.0001526	297.746	283.245	28.1548	0.120023	0.111849	-21.0833	1.3292	0.420488	-0.158782	0.420488	0.0165476
0.0001527	297.741	283.34	28.156	0.120142	0.112083	-22.4448	1.32918	0.420391	-0.158761	0.420391	0.0164462
0.0001528	297.737	283.443	28.1573	0.12027	0.112336	-23.8026	1.32916	0.420287	-0.15874	0.420287	0.0163375
0.0001529	297.733	283.554	28.1587	0.120408	0.112608	-25.1567	1.32915	0.420178	-0.158719	0.420178	0.0162218
0.000153	297.729	283.674	28.1602	0.120555	0.1129	-26.5071	1.32913	0.420062	-0.158697	0.420062	0.016099
0.0001531	297.724	283.801	28.1619	0.120713	0.113211	-27.8539	1.32911	0.419941	-0.158675	0.419941	0.0159693
0.0001532	297.72	283.935	28.1636	0.12088	0.113542	-29.1969	1.32909	0.419813	-0.158652	0.419813	0.0158328
0.0001533	297.716	284.078	28.1654	0.121057	0.113891	-30.5363	1.32907	0.419679	-0.15863	0.419679	0.0156895
0.0001534	297.711	284.229	28.1673	0.121244	0.11426	-31.8719	1.32905	0.419539	-0.158607	0.419539	0.0155398
0.0001535	297.707	284.387	28.1693	0.12144	0.114648	-33.2038	1.32903	0.419394	-0.158584	0.419394	0.0153835
0.0001536	297.703	284.553	28.1714	0.121646	0.115055	-34.532	1.32901	0.419242	-0.15856	0.419242	0.015221
0.0001537	297.699	284.727	28.1736	0.121861	0.115481	-35.8565	1.32899	0.419084	-0.158536	0.419084	0.0150522
0.0001538	297.694	284.908	28.1759	0.122086	0.115926	-37.1772	1.32897	0.41892	-0.158512	0.41892	0.0148774
0.0001539	297.69	285.098	28.1782	0.122321	0.116389	-38.4941	1.32895	0.418751	-0.158487	0.418751	0.0146967
0.000154	297.686	285.295	28.1807	0.122565	0.116872	-39.8064	1.32893	0.418587	-0.158463	0.418587	0.0145242
0.0001541	297.681	285.484	28.1831	0.1228	0.117335	-36.6628	1.32892	0.418435	-0.158439	0.418435	0.0143662
0.0001542	297.677	285.657	28.1853	0.123015	0.117761	-33.5228	1.3289	0.418305	-0.158417	0.418305	0.0142334
0.0001543	297.673	285.804	28.1871	0.123197	0.11812	-28.9074	1.32888	0.418193	-0.158395	0.418193	0.0141223
0.0001544	297.669	285.927	28.1887	0.123349	0.11842	-24.3026	1.32886	0.418102	-0.158375	0.418102	0.0140356
0.0001545	297.664	286.022	28.1899	0.123467	0.118654	-19.7086	1.32884	0.418214	-0.158365	0.418214	0.0141799
0.0001546	297.66	285.856	28.1879	0.123261	0.118247	-17.1533	1.32882	0.418316	-0.158354	0.418316	0.0143131
0.0001547	297.656	285.703	28.1861	0.123072	0.117872	-14.6526	1.3288	0.418475	-0.158347	0.418475	0.0145139
0.0001548	297.651	285.475	28.1833	0.122789	0.117314	-12.859	1.32878	0.418626	-0.158339	0.418626	0.0147056
0.0001549	297.647	285.259	28.1807	0.122521	0.116785	-11.1107	1.32876	0.418768	-0.15833	0.418768	0.0148884
0.000155	297.643	285.054	28.1783	0.122267	0.116283	-9.40632	1.32874	0.418901	-0.158321	0.418901	0.0150622
0.0001551	297.639	284.86	28.1759	0.122027	0.115808	-7.74492	1.32872	0.419026	-0.158312	0.419026	0.0152271
0.0001552	297.634	284.678	28.1737	0.1218	0.11536	-6.1254	1.32871	0.419143	-0.158302	0.419143	0.0153831
0.0001553	297.63	284.505	28.1716	0.121586	0.114937	-4.5467	1.32869	0.419252	-0.158292	0.419252	0.0155304
0.0001554	297.626	284.343	28.1697	0.121385	0.11454	-3.00783	1.32867	0.419353	-0.158281	0.419353	0.015669
0.0001555	297.621	284.191	28.1679	0.121197	0.114168	-1.50779	1.32865	0.419446	-0.15827	0.419446	0.015799
0.0001556	297.617	284.049	28.1662	0.12102	0.113819	-0.0456132	1.32863	0.419532	-0.158259	0.419532	0.0159206
0.0001557	297.613	283.916	28.1646	0.120856	0.113494	1.3724	1.32861	0.41961	-0.158247	0.41961	0.0160338
0.0001558	297.609	283.793	28.1631	0.120703	0.113192	2.78758	1.32859	0.419689	-0.158241	0.419689	0.0161397
0.0001559	297.604	283.679	28.1618	0.120562	0.112913	4.19141	1.32858	0.419684	-0.158235	0.419684	0.016141
0.00015596	297.602	283.676	28.1618	0.120559	0.112907	4.19141	1.32857	0.419746	-0.158222	0.419746	0.0162354
0.000156	297.6	283.574	28.1605	0.120431	0.112656	5.59145	1.32855	0.419802	-0.158209	0.419802	0.0163221
0.0001561	297.596	283.48	28.1594	0.120315	0.112425	6.98674	1.32853	0.419852	-0.158196	0.419852	0.0164019
0.0001562	297.591	283.393	28.1584	0.120207	0.112212	8.37919	1.32851	0.419895	-0.158183	0.419895	0.0164729
0.0001563	297.587	283.315	28.1575	0.120111	0.112023	9.76781	1.32849	0.419933	-0.158169	0.419933	0.0165372
0.0001564	297.583	283.245	28.1567	0.120024	0.111851	11.1526	1.32848	0.419964	-0.158154	0.419964	0.0165946
0.0001565	297.579	283.182	28.1559	0.119946	0.111697	12.5336	1.32846	0.419988	-0.15814	0.419988	0.0166422
0.0001566	297.574	283.13	28.1554	0.119881	0.111569	13.9097	1.32844	0.420007	-0.158125	0.420007	0.0166839
0.0001567	297.57	283.084	28.1548	0.119824	0.111455	15.283	1.32842	0.420019	-0.15811	0.420019	0.0167177
0.0001568	297.566	283.046	28.1544	0.119777	0.111362	16.6525	1.3284	0.420025	-0.158094	0.420025	0.0167436
0.0001569	297.561	283.016	28.1541	0.11974	0.111289	18.018	1.32838	0.420025	-0.158079	0.420025	0.0167617
0.000157	297.557	282.994	28.1539	0.119713	0.111236	19.3797	1.32836	0.420019	-0.158062	0.420019	0.0167718
0.0001571	297.553	282.981	28.1538	0.119696	0.111203	20.7376	1.32834	0.420006	-0.158046	0.420006	0.0167741
0.0001572	297.549	282.976	28.1538	0.11969	0.11119	22.0915	1.32832	0.419986	-0.158029	0.419986	0.0167686
0.0001573	297.544	282.979	28.1538	0.119693	0.111197	23.4416	1.3283	0.419961	-0.158012	0.419961	0.0167553
0.0001574	297.54	282.99	28.154	0.119707	0.111224	24.7877	1.32828	0.419929	-0.157995	0.419929	0.0167341
0.0001575	297.536	283.009	28.1543	0.119731	0.111271	26.13	1.32827	0.419891	-0.157977	0.419891	0.0167052
0.0001576	297.531	283.036	28.1547	0.119764	0.111338	27.4684	1.32825	0.419847	-0.157959	0.419847	0.0166686
0.0001577	297.527	283.071	28.1552	0.119808	0.111424	28.8028	1.32823	0.419796	-0.15794	0.419796	0.0166244
0.0001578	297.523	283.114	28.1558	0.119862	0.11153	30.1334	1.32821	0.419738	-0.157922	0.419738	0.0165706
0.0001579	297.519	283.168	28.1565	0.119928	0.111661	31.46	1.32819	0.419675	-0.157902	0.419675	0.0165112
0.000158	297.514	283.227	28.1573	0.120001	0.111806	32.7817	1.32817	0.419618	-0.157884	0.419618	0.0164591
0.0001581	297.51	283.279	28.1579	0.120065	0.111933	29.6496	1.32815	0.41957	-0.157865	0.41957	0.0164181
0.0001582	297.506	283.319	28.1585	0.120115	0.112031	26.5214	1.32813	0.419543	-0.157848	0.419543	0.0164028
0.0001583	297.501	283.332	28.1587	0.120132	0.112063	21.9191	1.32811	0.419537	-0.157832	0.419537	0.0164133
0.0001584	297.497	283.318	28.1586	0.120114	0.112029	17.3285	1.32809	0.419551	-0.157817	0.419551	0.0164494
0.0001585	297.493	283.277	28.1581	0.120064	0.111929	12.7494	1.32807	0.419611	-0.157804	0.419611	0.0165417
0.0001586	297.489	283.178	28.1569	0.11994	0.111686	10.3311	1.32805	0.419661	-0.157791	0.419661	0.0166221
0.0001587	297.484	283.091	28.1559	0.119833	0.111473	7.96505	1.32804	0.419719	-0.157778	0.419719	0.0167122
0.0001588	297.48	282.994	28.1548	0.119713	0.111236	6.34313	1.32802	0.419769	-0.157765	0.419769	0.0167933
0.0001589	297.476	282.907	28.1538	0.119605	0.111023	4.76209	1.328	0.419814	-0.157752	0.419814	0.0168676
0.000159	297.471	282.827	28.1528	0.119506	0.110827	3.22091	1.32798	0.419852	-0.157738	0.419852	0.0169339
0.0001591	297.467	282.756	28.152	0.119417	0.110652	1.71861	1.32796	0.419885	-0.157724	0.419885	0.0169934
0.0001592	297.463	282.692	28.1513	0.119338	0.110495	0.254215	1.32794	0.419911	-0.157709	0.419911	0.0170449
0.0001593	297.459	282.636	28.1506	0.119268	0.110358	-1.16403	1.32792	0.419931	-0.157694	0.419931	0.0170884
0.0001594	297.454	282.588	28.1501	0.119209	0.110241	-2.57359	1.3279	0.419945	-0.157679	0.419945	0.0171239
0.0001595	297.45	282.549	28.1496	0.11916	0.110144	-3.97147	1.32788	0.419952	-0.157664	0.419952	0.0171515
0.0001596	297.446	282.518	28.1493	0.119122	0.110068	-5.36981	1.32786	0.419952	-0.157648	0.419952	0.0171711
0.0001597	297.441	282.495	28.1491	0.119093	0.110012	-6.76461	1.32784	0.419947	-0.157632	0.419947	0.0171828
0.0001598	297.437	282.48	28.1489	0.119075	0.109975	-8.15586	1.32783	0.419942	-0.157622	0.419942	0.0171876
0.0001599	297.433	282.473	28.1489	0.119067	0.109959	-9.54355	1.32781	0.419937	-0.157616	0.419937	0.0171888
0.00015996	297.43	282.471	28.1489	0.119064	0.109953	-9.54355	1.32781	0.419917	-0.157599	0.419917	0.0171822
0.00016	297.429	282.475	28.149	0.119069	0.109963	-10.9277	1.32779	0.419891	-0.157582	0.419891	0.017168
0.0001601	297.424	282.486	28.1492	0.119083	0.109991	-12.3073	1.32777	0.41986	-0.157564	0.41986	0.017148
0.0001602	297.42	282.504	28.1494	0.119105	0.110035	-13.6843	1.32775	0.419823	-0.157547	0.419823	0.0171201
0.0001603	297.416	282.53	28.1498	0.119137	0.110098	-15.0577	1.32773	0.41978	-0.157529	0.41978	0.0170843
0.0001604	297.411	282.564	28.1503	0.119179	0.110181	-16.4274	1.32771	0.41973	-0.15751	0.41973	0.0170408
0.0001605	297.407	282.606	28.1508	0.119231	0.110284	-17.7936	1.32769	0.419673	-0.157491	0.419673	0.0169876
0.0001606	297.403	282.658	28.1515	0.119295	0.110411	-19.1552	1.32767	0.419611	-0.157472	0.419611	0.0169287
0.0001607	297.399	282.716	28.1523	0.119367	0.110553	-20.5141	1.32765	0.419543	-0.157453	0.419543	0.0168622
0.0001608	297.394	282.782	28.1532	0.119449	0.110715	-21.8694	1.32763	0.419469	-0.157434	0.419469	0.0167882
0.0001609	297.39	282.855	28.1541	0.119541	0.110896	-23.221	1.32761	0.419389	-0.157414	0.419389	0.0167067
0.000161	297.386	282.937	28.1552	0.119642	0.111096	-24.569	1.3276	0.419303	-0.157393	0.419303	0.0166178
0.0001611	297.381	283.027	28.1563	0.119754	0.111316	-25.9133	1.32758	0.41921	-0.157373	0.41921	0.0165215
0.0001612	297.377	283.125	28.1576	0.119875	0.111556	-27.2539	1.32756	0.419112	-0.157352	0.419112	0.0164181
0.0001613	297.373	283.23	28.159	0.120006	0.111814	-28.5909	1.32754	0.419007	-0.157331	0.419007	0.0163075
0.0001614	297.369	283.344	28.1604	0.120146	0.112092	-29.9242	1.32752	0.418896	-0.157309	0.418896	0.0161898
0.0001615	297.364	283.465	28.1619	0.120297	0.112389	-31.2538	1.3275	0.41878	-0.157287	0.41878	0.0160652
0.0001616	297.36	283.594	28.1636	0.120457	0.112705	-32.5797	1.32748	0.418657	-0.157265	0.418657	0.0159338
0.0001617	297.356	283.731	28.1653	0.120626	0.113041	-33.9019	1.32746	0.418528	-0.157243	0.418528	0.0157956
0.0001618	297.351	283.876	28.1672	0.120806	0.113395	-35.2204	1.32744	0.418394	-0.15722	0.418394	0.0156509
0.0001619	297.347	284.028	28.1691	0.120995	0.113769	-36.5351	1.32742	0.418252	-0.157197	0.418252	0.0154978
0.000162	297.343	284.19	28.1711	0.121196	0.114166	-37.8452	1.3274	0.418118	-0.157174	0.418118	0.0153554
0.0001621	297.339	284.341	28.1731	0.121383	0.114536	-34.7044	1.32739	0.417992	-0.157152	0.417992	0.0152227
0.0001622	297.334	284.483	28.1749	0.121559	0.114883	-31.5672	1.32737	0.417887	-0.157131	0.417887	0.0151162
0.0001623	297.33	284.596	28.1763	0.121699	0.115161	-26.9561	1.32735	0.417804	-0.157111	0.417804	0.015035
0.0001624	297.326	284.682	28.1774	0.121806	0.115372	-22.3557	1.32733	0.417741	-0.157092	0.417741	0.0149786
0.0001625	297.321	284.742	28.1782	0.12188	0.115517	-17.7661	1.32731	0.417839	-0.157081	0.417839	0.0151111
0.0001626	297.317	284.593	28.1764	0.121696	0.115154	-15.2538	1.32729	0.417926	-0.15707	0.417926	0.0152326
0.0001627	297.313	284.458	28.1748	0.121528	0.114822	-12.7954	1.32727	0.418058	-0.157061	0.418058	0.0154076
0.0001628	297.309	284.265	28.1725	0.121289	0.114349	-11.0558	1.32725	0.418182	-0.157051	0.418182	0.0155736
0.0001629	297.304	284.083	28.1703	0.121063	0.113903	-9.36008	1.32723	0.418298	-0.157041	0.418298	0.0157307
0.000163	297.3	283.911	28.1682	0.12085	0.113482	-7.70707	1.32721	0.418405	-0.157031	0.418405	0.015879
0.0001631	297.296	283.749	28.1663	0.120649	0.113086	-6.09572	1.32719	0.418505	-0.15702	0.418505	0.0160185
0.0001632	297.291	283.598	28.1644	0.120462	0.112715	-4.525	1.32717	0.418597	-0.157009	0.418597	0.0161494
0.0001633	297.287	283.456	28.1627	0.120286	0.112368	-2.99389	1.32716	0.418682	-0.156998	0.418682	0.0162718
0.0001634	297.283	283.324	28.1612	0.120122	0.112044	-1.50142	1.32714	0.41876	-0.156986	0.41876	0.0163858
0.0001635	297.279	283.201	28.1597	0.11997	0.111743	-0.0466223	1.32712	0.418831	-0.156974	0.418831	0.0164914
0.0001636	297.274	283.088	28.1584	0.119829	0.111465	1.3641	1.3271	0.418895	-0.156961	0.418895	0.0165889
0.0001637	297.27	282.983	28.1571	0.119699	0.111208	2.77201	1.32708	0.418952	-0.156949	0.418952	0.0166783
0.0001638	297.266	282.887	28.156	0.11958	0.110973	4.16859	1.32706	0.419007	-0.156942	0.419007	0.0167588
0.0001639	297.261	282.801	28.155	0.119474	0.110764	5.56139	1.32705	0.419003	-0.156935	0.419003	0.01676
0.00016396	297.259	282.799	28.155	0.119471	0.110758	5.56139	1.32704	0.419044	-0.156922	0.419044	0.0168303
0.000164	297.257	282.723	28.1541	0.119377	0.110572	6.95042	1.32702	0.41908	-0.156908	0.41908	0.016894
0.0001641	297.253	282.654	28.1533	0.119291	0.110403	8.3347	1.327	0.419111	-0.156894	0.419111	0.0169509
0.0001642	297.249	282.593	28.1525	0.119215	0.110252	9.71616	1.32698	0.419136	-0.156879	0.419136	0.0170009
0.0001643	297.244	282.538	28.1519	0.119147	0.110119	11.0938	1.32696	0.419154	-0.156864	0.419154	0.017043
0.0001644	297.24	282.492	28.1514	0.11909	0.110005	12.4676	1.32695	0.419166	-0.156849	0.419166	0.0170771
0.0001645	297.236	282.454	28.151	0.119043	0.109912	13.8376	1.32693	0.419171	-0.156833	0.419171	0.0171014
0.0001646	297.231	282.426	28.1507	0.119008	0.109844	15.2029	1.32691	0.419171	-0.156818	0.419171	0.0171197
0.0001647	297.227	282.404	28.1505	0.118982	0.109791	16.5652	1.32689	0.419164	-0.156802	0.419164	0.0171301
0.0001648	297.223	282.391	28.1504	0.118965	0.109758	17.9237	1.32687	0.419151	-0.156785	0.419151	0.0171326
0.0001649	297.219	282.385	28.1503	0.118958	0.109744	19.2784	1.32685	0.419132	-0.156768	0.419132	0.0171273
0.000165	297.214	282.388	28.1504	0.118961	0.109751	20.6292	1.32683	0.419107	-0.156751	0.419107	0.0171141
0.0001651	297.21	282.399	28.1506	0.118975	0.109777	21.9762	1.32681	0.419075	-0.156734	0.419075	0.017093
0.0001652	297.206	282.418	28.1509	0.118998	0.109823	23.3193	1.32679	0.419038	-0.156716	0.419038	0.0170642
0.0001653	297.201	282.444	28.1513	0.119031	0.109889	24.6585	1.32677	0.418994	-0.156698	0.418994	0.0170276
0.0001654	297.197	282.479	28.1518	0.119074	0.109974	25.9938	1.32675	0.418944	-0.15668	0.418944	0.0169833
0.0001655	297.193	282.522	28.1523	0.119127	0.110079	27.3253	1.32673	0.418887	-0.156661	0.418887	0.0169314
0.0001656	297.189	282.573	28.153	0.11919	0.110204	28.6529	1.32672	0.418825	-0.156642	0.418825	0.0168718
0.0001657	297.184	282.632	28.1538	0.119263	0.110347	29.9765	1.3267	0.418757	-0.156622	0.418757	0.0168048
0.0001658	297.18	282.698	28.1547	0.119346	0.110511	31.2963	1.32668	0.418681	-0.156603	0.418681	0.0167284
0.0001659	297.176	282.775	28.1556	0.119441	0.110698	32.6121	1.32666	0.4186	-0.156583	0.4186	0.0166455
0.000166	297.171	282.858	28.1567	0.119544	0.110903	33.9231	1.32664	0.418525	-0.156563	0.418525	0.0165711
0.0001661	297.167	282.933	28.1577	0.119637	0.111086	30.7856	1.32662	0.418459	-0.156544	0.418459	0.016507
0.0001662	297.163	282.997	28.1585	0.119716	0.111243	27.6519	1.3266	0.418414	-0.156526	0.418414	0.0164698
0.0001663	297.159	283.033	28.159	0.119761	0.111332	23.046	1.32658	0.41839	-0.156509	0.41839	0.0164583
0.0001664	297.154	283.042	28.1592	0.119773	0.111354	18.4517	1.32656	0.418386	-0.156493	0.418386	0.0164725
0.0001665	297.15	283.025	28.159	0.119751	0.11131	13.869	1.32654	0.418455	-0.15648	0.418455	0.0165755
0.0001666	297.146	282.914	28.1577	0.119613	0.111039	11.4342	1.32652	0.418514	-0.156468	0.418514	0.0166674
0.0001667	297.141	282.815	28.1566	0.119491	0.110798	9.05207	1.32651	0.418589	-0.156456	0.418589	0.0167796
0.0001668	297.137	282.696	28.1551	0.119343	0.110505	7.41022	1.32649	0.418657	-0.156444	0.418657	0.0168834
0.0001669	297.133	282.585	28.1538	0.119206	0.110234	5.80974	1.32647	0.418718	-0.156431	0.418718	0.016979
0.000167	297.129	282.484	28.1526	0.11908	0.109985	4.2496	1.32645	0.418771	-0.156418	0.418771	0.0170645
0.0001671	297.124	282.393	28.1515	0.118967	0.109762	2.7288	1.32643	0.418818	-0.156404	0.418818	0.0171431
0.0001672	297.12	282.309	28.1506	0.118863	0.109557	1.24636	1.32641	0.418859	-0.156391	0.418859	0.0172137
0.0001673	297.116	282.234	28.1497	0.11877	0.109372	-0.189509	1.32639	0.418895	-0.156377	0.418895	0.0172774
0.0001674	297.111	282.166	28.1489	0.118685	0.109206	-1.59963	1.32637	0.418924	-0.156363	0.418924	0.0173331
0.0001675	297.107	282.106	28.1482	0.118611	0.109059	-2.99802	1.32635	0.418946	-0.156348	0.418946	0.0173809
0.0001676	297.103	282.054	28.1476	0.118547	0.108932	-4.39128	1.32633	0.418963	-0.156333	0.418963	0.0174207
0.0001677	297.099	282.011	28.1471	0.118493	0.108826	-5.78102	1.32631	0.418973	-0.156318	0.418973	0.0174524
0.0001678	297.094	281.975	28.1467	0.118449	0.10874	-7.16724	1.32629	0.418983	-0.156309	0.418983	0.0174773
0.0001679	297.09	281.948	28.1465	0.118416	0.108673	-8.54993	1.32628	0.418978	-0.156302	0.418978	0.0174786
0.00016796	297.087	281.946	28.1465	0.118413	0.108667	-8.54993	1.32628	0.418974	-0.156286	0.418974	0.017492
0.000168	297.086	281.929	28.1463	0.118392	0.108627	-9.92907	1.32626	0.418964	-0.15627	0.418964	0.0174978
0.0001681	297.081	281.921	28.1462	0.118382	0.108606	-11.3038	1.32624	0.418949	-0.156253	0.418949	0.0174976
0.0001682	297.077	281.918	28.1462	0.118378	0.108599	-12.6758	1.32622	0.418927	-0.156236	0.418927	0.0174895
0.0001683	297.073	281.923	28.1463	0.118385	0.108612	-14.0443	1.3262	0.4189	-0.156219	0.4189	0.0174735
0.0001684	297.069	281.937	28.1466	0.118402	0.108645	-15.4092	1.32618	0.418865	-0.156201	0.418865	0.0174476
0.0001685	297.064	281.96	28.1469	0.118431	0.108703	-16.7705	1.32616	0.418824	-0.156184	0.418824	0.0174148
0.0001686	297.06	281.991	28.1473	0.118469	0.108778	-18.1273	1.32614	0.418778	-0.156165	0.418778	0.0173742
0.0001687	297.056	282.029	28.1479	0.118516	0.108872	-19.4814	1.32612	0.418726	-0.156147	0.418726	0.0173268
0.0001688	297.051	282.075	28.1485	0.118573	0.108984	-20.8319	1.3261	0.418667	-0.156128	0.418667	0.0172717
0.0001689	297.047	282.128	28.1492	0.118639	0.109115	-22.1787	1.32608	0.418603	-0.156109	0.418603	0.017209
0.000169	297.043	282.19	28.15	0.118715	0.109265	-23.522	1.32606	0.418533	-0.15609	0.418533	0.0171386
0.0001691	297.039	282.259	28.1509	0.118801	0.109435	-24.8616	1.32605	0.418456	-0.15607	0.418456	0.0170607
0.0001692	297.034	282.336	28.1519	0.118897	0.109624	-26.1976	1.32603	0.418374	-0.15605	0.418374	0.0169754
0.0001693	297.03	282.422	28.153	0.119003	0.109833	-27.5299	1.32601	0.418285	-0.156029	0.418285	0.0168826
0.0001694	297.026	282.515	28.1542	0.119118	0.110061	-28.8586	1.32599	0.418191	-0.156009	0.418191	0.0167826
0.0001695	297.021	282.616	28.1555	0.119243	0.110308	-30.1836	1.32597	0.41809	-0.155988	0.41809	0.0166753
0.0001696	297.017	282.724	28.1569	0.119378	0.110574	-31.5049	1.32595	0.417984	-0.155966	0.417984	0.016561
0.0001697	297.013	282.841	28.1584	0.119522	0.11086	-32.8225	1.32593	0.417871	-0.155945	0.417871	0.0164396
0.0001698	297.009	282.965	28.16	0.119677	0.111164	-34.1365	1.32591	0.417751	-0.155923	0.417751	0.0163094
0.0001699	297.004	283.099	28.1617	0.119843	0.111492	-35.4467	1.32589	0.417627	-0.1559	0.417627	0.0161743
0.00017	297	283.239	28.1634	0.120016	0.111835	-36.7524	1.32587	0.417508	-0.155878	0.417508	0.0160471
0.0001701	296.996	283.371	28.1651	0.12018	0.112158	-33.6121	1.32585	0.417399	-0.155857	0.417399	0.0159313
0.0001702	296.991	283.491	28.1667	0.120329	0.112453	-30.4754	1.32584	0.41731	-0.155837	0.41731	0.0158413
0.0001703	296.987	283.584	28.1679	0.120444	0.112681	-25.8666	1.32582	0.417243	-0.155817	0.417243	0.0157769
0.0001704	296.983	283.65	28.1687	0.120526	0.112843	-21.2685	1.3258	0.417214	-0.1558	0.417214	0.0157604
0.0001705	296.979	283.665	28.169	0.120545	0.112879	-16.6811	1.32578	0.417285	-0.155788	0.417285	0.0158638
0.0001706	296.974	283.552	28.1676	0.120404	0.112601	-14.1951	1.32576	0.417351	-0.155776	0.417351	0.0159626
0.0001707	296.97	283.443	28.1663	0.12027	0.112336	-11.7626	1.32574	0.417441	-0.155764	0.417441	0.016092
0.0001708	296.966	283.303	28.1646	0.120096	0.111992	-10.0563	1.32572	0.417525	-0.155753	0.417525	0.016213
0.0001709	296.961	283.172	28.1631	0.119933	0.111672	-8.39298	1.3257	0.417601	-0.155741	0.417601	0.0163256
0.000171	296.957	283.05	28.1616	0.119783	0.111374	-6.77158	1.32568	0.417671	-0.155729	0.417671	0.01643
0.0001711	296.953	282.938	28.1603	0.119643	0.111098	-5.19105	1.32566	0.417734	-0.155716	0.417734	0.0165263
0.0001712	296.949	282.834	28.159	0.119514	0.110843	-3.65037	1.32564	0.417788	-0.155703	0.417788	0.0166125
0.0001713	296.944	282.741	28.158	0.119399	0.110616	-2.14857	1.32562	0.417837	-0.15569	0.417837	0.016692
0.0001714	296.94	282.655	28.1569	0.119293	0.110406	-0.684671	1.32561	0.417879	-0.155677	0.417879	0.0167637
0.0001715	296.936	282.578	28.156	0.119197	0.110216	0.733057	1.32559	0.417916	-0.155663	0.417916	0.0168285
0.0001716	296.931	282.508	28.1552	0.11911	0.110044	2.13438	1.32557	0.417947	-0.155648	0.417947	0.0168856
0.0001717	296.927	282.446	28.1545	0.119033	0.109892	3.52383	1.32555	0.417971	-0.155634	0.417971	0.0169348
0.0001718	296.923	282.392	28.1539	0.118966	0.10976	4.91106	1.32553	0.417996	-0.155626	0.417996	0.0169773
0.0001719	296.919	282.346	28.1534	0.118909	0.109649	6.29453	1.32552	0.417991	-0.155619	0.417991	0.0169786
0.00017196	296.916	282.344	28.1534	0.118906	0.109643	6.29453	1.32551	0.418001	-0.155604	0.418001	0.0170098
0.000172	296.914	282.309	28.153	0.118863	0.109557	7.67424	1.32549	0.418004	-0.155588	0.418004	0.0170335
0.0001721	296.91	282.282	28.1527	0.118829	0.10949	9.04923	1.32547	0.418004	-0.155572	0.418004	0.0170513
0.0001722	296.906	282.26	28.1525	0.118803	0.109438	10.4214	1.32545	0.417997	-0.155556	0.417997	0.0170613
0.0001723	296.901	282.247	28.1524	0.118787	0.109406	11.7898	1.32543	0.417984	-0.15554	0.417984	0.0170634
0.0001724	296.897	282.242	28.1523	0.11878	0.109393	13.1543	1.32541	0.417963	-0.155523	0.417963	0.0170558
0.0001725	296.893	282.247	28.1525	0.118786	0.109405	14.5151	1.3254	0.417937	-0.155506	0.417937	0.0170414
0.0001726	296.889	282.259	28.1527	0.118801	0.109435	15.8711	1.32538	0.417904	-0.155488	0.417904	0.0170192
0.0001727	296.884	282.279	28.153	0.118826	0.109484	17.2243	1.32536	0.417866	-0.15547	0.417866	0.0169903
0.0001728	296.88	282.306	28.1533	0.11886	0.10955	18.5736	1.32534	0.417823	-0.155452	0.417823	0.0169537
0.0001729	296.876	282.341	28.1538	0.118903	0.109635	19.9191	1.32532	0.417773	-0.155434	0.417773	0.0169095
0.000173	296.871	282.384	28.1544	0.118956	0.10974	21.2608	1.3253	0.417717	-0.155415	0.417717	0.0168577
0.0001731	296.867	282.435	28.1551	0.119019	0.109865	22.5986	1.32528	0.417655	-0.155396	0.417655	0.0167983
0.0001732	296.863	282.493	28.1558	0.119092	0.110009	23.9326	1.32526	0.417587	-0.155377	0.417587	0.0167315
0.0001733	296.859	282.56	28.1567	0.119174	0.110172	25.2627	1.32524	0.417512	-0.155357	0.417512	0.0166573
0.0001734	296.854	282.634	28.1577	0.119267	0.110354	26.589	1.32522	0.417432	-0.155337	0.417432	0.0165757
0.0001735	296.85	282.717	28.1588	0.119369	0.110556	27.9114	1.3252	0.417346	-0.155317	0.417346	0.0164869
0.0001736	296.846	282.807	28.1599	0.11948	0.110776	29.2299	1.32518	0.417254	-0.155297	0.417254	0.0163909
0.0001737	296.841	282.905	28.1612	0.119602	0.111016	30.5445	1.32517	0.417156	-0.155276	0.417156	0.0162879
0.0001738	296.837	283.01	28.1625	0.119733	0.111275	31.8553	1.32515	0.417051	-0.155254	0.417051	0.016176
0.0001739	296.833	283.125	28.164	0.119876	0.111557	33.1621	1.32513	0.416941	-0.155233	0.416941	0.016059
0.000174	296.829	283.247	28.1656	0.120026	0.111854	34.4641	1.32511	0.416837	-0.155212	0.416837	0.0159498
0.0001741	296.824	283.36	28.167	0.120166	0.112132	31.3228	1.32509	0.416742	-0.155191	0.416742	0.0158519
0.0001742	296.82	283.461	28.1683	0.120292	0.112381	28.1854	1.32507	0.416668	-0.155171	0.416668	0.0157796
0.0001743	296.816	283.536	28.1693	0.120385	0.112563	23.5775	1.32505	0.416615	-0.155153	0.416615	0.0157326
0.0001744	296.811	283.583	28.1699	0.120443	0.112679	18.9812	1.32503	0.416601	-0.155136	0.416601	0.0157334
0.0001745	296.807	283.58	28.1699	0.120439	0.11267	14.3964	1.32501	0.416664	-0.155124	0.416664	0.0158282
0.0001746	296.803	283.475	28.1687	0.120309	0.112415	11.9568	1.32499	0.416723	-0.155111	0.416723	0.0159186
0.0001747	296.799	283.376	28.1675	0.120186	0.112171	9.56982	1.32497	0.4168	-0.155099	0.4168	0.0160312
0.0001748	296.794	283.253	28.166	0.120034	0.111871	7.92228	1.32496	0.41687	-0.155087	0.41687	0.0161356
0.0001749	296.79	283.14	28.1647	0.119893	0.111592	6.31626	1.32494	0.416933	-0.155075	0.416933	0.016232
0.000175	296.786	283.035	28.1634	0.119763	0.111335	4.75071	1.32492	0.41699	-0.155062	0.41699	0.0163205
0.0001751	296.781	282.939	28.1623	0.119644	0.1111	3.22463	1.3249	0.417039	-0.155048	0.417039	0.0163992
0.0001752	296.777	282.853	28.1613	0.119538	0.11089	1.73705	1.32488	0.417082	-0.155035	0.417082	0.0164713
0.0001753	296.773	282.774	28.1604	0.11944	0.110697	0.287	1.32486	0.417119	-0.155021	0.417119	0.0165356
0.0001754	296.769	282.704	28.1596	0.119353	0.110525	-1.11736	1.32484	0.41715	-0.155007	0.41715	0.0165933
0.0001755	296.764	282.641	28.1588	0.119275	0.110371	-2.51229	1.32482	0.417175	-0.154992	0.417175	0.0166432
0.0001756	296.76	282.586	28.1582	0.119207	0.110236	-3.89566	1.3248	0.417194	-0.154977	0.417194	0.0166853
0.0001757	296.756	282.539	28.1577	0.119149	0.110121	-5.27921	1.32478	0.417206	-0.154962	0.417206	0.0167197
0.0001758	296.751	282.501	28.1573	0.119101	0.110027	-6.65926	1.32476	0.417219	-0.154954	0.417219	0.0167474
0.0001759	296.747	282.47	28.1569	0.119063	0.109952	-8.0358	1.32475	0.417215	-0.154947	0.417215	0.0167486
0.00017596	296.745	282.468	28.1569	0.11906	0.109946	-8.0358	1.32474	0.417213	-0.154931	0.417213	0.0167651
0.000176	296.743	282.448	28.1567	0.119035	0.109897	-9.40882	1.32473	0.417205	-0.154915	0.417205	0.0167742
0.0001761	296.739	282.435	28.1566	0.11902	0.109867	-10.7774	1.32471	0.417193	-0.154898	0.417193	0.0167775
0.0001762	296.734	282.429	28.1566	0.119012	0.109851	-12.1434	1.32469	0.417175	-0.154882	0.417175	0.0167731
0.0001763	296.73	282.431	28.1566	0.119014	0.109855	-13.5058	1.32467	0.41715	-0.154865	0.41715	0.016761
0.0001764	296.726	282.441	28.1568	0.119026	0.109879	-14.8646	1.32465	0.417118	-0.154847	0.417118	0.0167392
0.0001765	296.721	282.46	28.1571	0.119051	0.109928	-16.2199	1.32463	0.417081	-0.154829	0.417081	0.0167108
0.0001766	296.717	282.487	28.1575	0.119084	0.109993	-17.5708	1.32461	0.417037	-0.154811	0.417037	0.0166748
0.0001767	296.713	282.522	28.158	0.119127	0.110078	-18.9189	1.32459	0.416988	-0.154793	0.416988	0.0166321
0.0001768	296.709	282.563	28.1585	0.119178	0.11018	-20.2635	1.32457	0.416933	-0.154774	0.416933	0.016582
0.0001769	296.704	282.613	28.1592	0.11924	0.110301	-21.6044	1.32455	0.416872	-0.154755	0.416872	0.0165243
0.000177	296.7	282.67	28.16	0.119311	0.110442	-22.9418	1.32453	0.416805	-0.154736	0.416805	0.0164593
0.0001771	296.696	282.736	28.1608	0.119392	0.110602	-24.2755	1.32452	0.416732	-0.154717	0.416732	0.0163869
0.0001772	296.691	282.809	28.1618	0.119483	0.110781	-25.6056	1.3245	0.416653	-0.154697	0.416653	0.0163072
0.0001773	296.687	282.89	28.1628	0.119583	0.11098	-26.9321	1.32448	0.416568	-0.154676	0.416568	0.0162203
0.0001774	296.683	282.978	28.164	0.119693	0.111197	-28.2549	1.32446	0.416477	-0.154656	0.416477	0.0161263
0.0001775	296.679	283.075	28.1652	0.119813	0.111434	-29.5742	1.32444	0.416381	-0.154635	0.416381	0.0160253
0.0001776	296.674	283.179	28.1665	0.119943	0.11169	-30.8897	1.32442	0.416278	-0.154614	0.416278	0.0159173
0.0001777	296.67	283.292	28.168	0.120082	0.111964	-32.2016	1.3244	0.416169	-0.154593	0.416169	0.0158025
0.0001778	296.666	283.411	28.1695	0.12023	0.112258	-33.5099	1.32438	0.416053	-0.154571	0.416053	0.015679
0.0001779	296.661	283.541	28.1712	0.120391	0.112575	-34.8144	1.32436	0.415933	-0.154549	0.415933	0.0155508
0.000178	296.657	283.676	28.1729	0.120559	0.112907	-36.1144	1.32434	0.415818	-0.154527	0.415818	0.0154303
0.0001781	296.653	283.804	28.1745	0.120717	0.113219	-32.9736	1.32432	0.415713	-0.154506	0.415713	0.0153209
0.0001782	296.649	283.919	28.176	0.12086	0.113503	-29.8363	1.3243	0.415628	-0.154485	0.415628	0.0152369
0.0001783	296.644	284.008	28.1771	0.12097	0.11372	-25.2285	1.32429	0.415583	-0.154467	0.415583	0.0151999
0.0001784	296.64	284.046	28.1777	0.121017	0.113812	-20.6315	1.32427	0.415572	-0.154451	0.415572	0.0152046
0.0001785	296.636	284.038	28.1776	0.121007	0.113792	-11.6012	1.32425	0.415633	-0.154438	0.415633	0.0152956
0.0001786	296.631	283.936	28.1764	0.12088	0.113542	-9.22485	1.32423	0.415684	-0.154425	0.415684	0.0153753
0.0001787	296.627	283.846	28.1753	0.120769	0.113323	-5.459	1.32421	0.415746	-0.154413	0.415746	0.0154678
0.0001788	296.623	283.743	28.1741	0.120641	0.11307	-3.91952	1.32419	0.4158	-0.1544	0.4158	0.0155507
0.0001789	296.619	283.651	28.173	0.120527	0.112844	-2.41887	1.32417	0.415848	-0.154386	0.415848	0.015627
0.000179	296.614	283.565	28.172	0.120421	0.112635	-0.956087	1.32415	0.41589	-0.154373	0.41589	0.0156959
0.0001791	296.61	283.489	28.1711	0.120326	0.112447	0.460633	1.32413	0.415926	-0.154359	0.415926	0.0157583
0.0001792	296.606	283.419	28.1703	0.120239	0.112276	1.85621	1.32411	0.415956	-0.154344	0.415956	0.0158131
0.0001793	296.601	283.357	28.1696	0.120163	0.112125	3.23996	1.32409	0.41598	-0.15433	0.41598	0.0158605
0.0001794	296.597	283.304	28.169	0.120096	0.111994	4.61992	1.32408	0.415998	-0.154315	0.415998	0.0159003
0.0001795	296.593	283.258	28.1685	0.12004	0.111883	5.99615	1.32406	0.416009	-0.1543	0.416009	0.0159326
0.0001796	296.589	283.221	28.1681	0.119994	0.111791	7.36864	1.32404	0.416014	-0.154284	0.416014	0.0159573
0.0001797	296.584	283.192	28.1678	0.119958	0.11172	8.73738	1.32402	0.416014	-0.154269	0.416014	0.0159746
0.0001798	296.58	283.171	28.1675	0.119931	0.111668	10.1024	1.324	0.416013	-0.154259	0.416013	0.0159853
0.0001799	296.576	283.157	28.1674	0.119915	0.111636	11.4636	1.32399	0.416009	-0.154252	0.416009	0.0159865
0.00017996	296.573	283.155	28.1674	0.119912	0.11163	11.4636	1.32398	0.415994	-0.154236	0.415994	0.0159864
0.00018	296.571	283.152	28.1674	0.119909	0.111623	12.821	1.32396	0.415973	-0.154219	0.415973	0.0159791
0.0001801	296.567	283.157	28.1675	0.119915	0.111635	14.1738	1.32394	0.415948	-0.154202	0.415948	0.0159663
0.0001802	296.563	283.168	28.1677	0.119928	0.111661	15.5237	1.32392	0.415916	-0.154184	0.415916	0.015946
0.0001803	296.559	283.187	28.168	0.119951	0.111707	16.8698	1.3239	0.415879	-0.154167	0.415879	0.0159184
0.0001804	296.554	283.213	28.1684	0.119984	0.111772	18.2121	1.32388	0.415836	-0.154149	0.415836	0.0158833
0.0001805	296.55	283.248	28.1689	0.120027	0.111857	19.5506	1.32386	0.415785	-0.15413	0.415785	0.0158391
0.0001806	296.546	283.292	28.1695	0.120082	0.111966	20.8843	1.32385	0.415729	-0.154112	0.415729	0.0157894
0.0001807	296.541	283.343	28.1701	0.120145	0.112089	22.2152	1.32383	0.415668	-0.154093	0.415668	0.0157325
0.0001808	296.537	283.401	28.1709	0.120217	0.112232	23.5422	1.32381	0.415601	-0.154073	0.415601	0.0156684
0.0001809	296.533	283.467	28.1718	0.120299	0.112393	24.8654	1.32379	0.415527	-0.154054	0.415527	0.0155973
0.000181	296.529	283.54	28.1727	0.12039	0.112574	26.1848	1.32377	0.415448	-0.154034	0.415448	0.0155191
0.0001811	296.524	283.622	28.1738	0.120491	0.112774	27.5003	1.32375	0.415363	-0.154014	0.415363	0.0154339
0.0001812	296.52	283.711	28.1749	0.120602	0.112992	28.812	1.32373	0.415272	-0.153993	0.415272	0.0153419
0.0001813	296.516	283.808	28.1762	0.120722	0.11323	30.1198	1.32371	0.415175	-0.153972	0.415175	0.015243
0.0001814	296.511	283.913	28.1775	0.120852	0.113486	31.4238	1.32369	0.415072	-0.153951	0.415072	0.0151375
0.0001815	296.507	284.025	28.179	0.120991	0.113762	32.7239	1.32367	0.414964	-0.15393	0.414964	0.0150253
0.0001816	296.503	284.145	28.1805	0.12114	0.114056	34.0201	1.32365	0.41485	-0.153908	0.41485	0.0149067
0.0001817	296.499	284.273	28.1821	0.121299	0.114369	35.3125	1.32364	0.414729	-0.153886	0.414729	0.0147816
0.0001818	296.494	284.408	28.1839	0.121466	0.1147	36.6009	1.32362	0.414603	-0.153863	0.414603	0.0146502
0.0001819	296.49	284.551	28.1857	0.121644	0.115051	37.8855	1.3236	0.41447	-0.153841	0.41447	0.0145109
0.000182	296.486	284.704	28.1876	0.121833	0.115424	39.1651	1.32358	0.414345	-0.153818	0.414345	0.0143819
0.0001821	296.481	284.845	28.1894	0.122008	0.115771	36.0073	1.32356	0.414228	-0.153796	0.414228	0.0142621
0.0001822	296.477	284.977	28.1911	0.122172	0.116094	32.8534	1.32354	0.414132	-0.153776	0.414132	0.0141678
0.0001823	296.473	285.081	28.1924	0.1223	0.116348	28.2308	1.32352	0.414057	-0.153756	0.414057	0.0140977
0.0001824	296.469	285.157	28.1934	0.122395	0.116535	23.6199	1.3235	0.414002	-0.153737	0.414002	0.0140515
0.0001825	296.464	285.207	28.1941	0.122456	0.116657	19.0205	1.32348	0.414094	-0.153726	0.414094	0.0141755
0.0001826	296.46	285.063	28.1924	0.122279	0.116305	16.4971	1.32346	0.414177	-0.153715	0.414177	0.0142889
0.0001827	296.456	284.933	28.1908	0.122116	0.115985	14.0277	1.32344	0.4143	-0.153705	0.4143	0.0144501
0.0001828	296.451	284.749	28.1886	0.121889	0.115535	12.277	1.32342	0.414416	-0.153696	0.414416	0.0146028
0.0001829	296.447	284.575	28.1865	0.121674	0.11511	10.5702	1.32341	0.414523	-0.153685	0.414523	0.0147471
0.000183	296.443	284.412	28.1845	0.121471	0.11471	8.90648	1.32339	0.414623	-0.153675	0.414623	0.0148832
0.0001831	296.439	284.259	28.1827	0.121281	0.114334	7.28464	1.32337	0.414716	-0.153664	0.414716	0.0150111
0.0001832	296.434	284.115	28.181	0.121103	0.113982	5.70366	1.32335	0.414801	-0.153653	0.414801	0.0151309
0.0001833	296.43	283.981	28.1793	0.120936	0.113654	4.16253	1.32333	0.414879	-0.153641	0.414879	0.0152426
0.0001834	296.426	283.856	28.1779	0.120782	0.113347	2.66026	1.32331	0.414951	-0.153629	0.414951	0.0153465
0.0001835	296.421	283.74	28.1765	0.120638	0.113064	1.19588	1.32329	0.415015	-0.153616	0.415015	0.0154425
0.0001836	296.417	283.633	28.1752	0.120505	0.112801	-0.222492	1.32327	0.415073	-0.153604	0.415073	0.0155309
0.0001837	296.413	283.535	28.174	0.120383	0.11256	-1.61578	1.32325	0.415123	-0.15359	0.415123	0.0156098
0.0001838	296.409	283.447	28.173	0.120274	0.112345	-2.99747	1.32323	0.415175	-0.153584	0.415175	0.0156833
0.0001839	296.404	283.366	28.172	0.120174	0.112147	-4.37422	1.32322	0.41517	-0.153577	0.41517	0.0156845
0.00018396	296.402	283.364	28.172	0.120171	0.112141	-4.37422	1.32321	0.415206	-0.153563	0.415206	0.0157472
0.000184	296.4	283.293	28.1712	0.120084	0.111969	-5.74749	1.3232	0.415238	-0.153549	0.415238	0.0158037
0.0001841	296.396	283.23	28.1705	0.120005	0.111813	-7.11641	1.32318	0.415264	-0.153535	0.415264	0.0158547
0.0001842	296.391	283.173	28.1698	0.119934	0.111673	-8.48273	1.32316	0.415285	-0.15352	0.415285	0.0158981
0.0001843	296.387	283.123	28.1692	0.119873	0.111552	-9.84552	1.32314	0.415299	-0.153505	0.415299	0.0159341
0.0001844	296.383	283.082	28.1688	0.119822	0.111451	-11.2048	1.32312	0.415307	-0.153489	0.415307	0.0159625
0.0001845	296.379	283.049	28.1684	0.119781	0.11137	-12.5606	1.3231	0.415308	-0.153474	0.415308	0.0159815
0.0001846	296.374	283.026	28.1682	0.119752	0.111313	-13.9119	1.32308	0.415304	-0.153458	0.415304	0.0159949
0.0001847	296.37	283.009	28.168	0.119731	0.111271	-15.2607	1.32306	0.415294	-0.153441	0.415294	0.0160008
0.0001848	296.366	283	28.168	0.119719	0.111249	-16.6058	1.32304	0.415278	-0.153425	0.415278	0.0159991
0.0001849	296.361	282.998	28.168	0.119718	0.111246	-17.9474	1.32302	0.415256	-0.153408	0.415256	0.01599
0.000185	296.357	283.005	28.1681	0.119726	0.111263	-19.2855	1.323	0.415227	-0.15339	0.415227	0.0159735
0.0001851	296.353	283.02	28.1684	0.119745	0.111299	-20.62	1.32298	0.415193	-0.153373	0.415193	0.0159495
0.0001852	296.349	283.043	28.1687	0.119773	0.111355	-21.9509	1.32297	0.415153	-0.153355	0.415153	0.0159181
0.0001853	296.344	283.073	28.1691	0.119811	0.11143	-23.2782	1.32295	0.415107	-0.153337	0.415107	0.0158794
0.0001854	296.34	283.112	28.1697	0.119859	0.111524	-24.602	1.32293	0.415054	-0.153318	0.415054	0.0158334
0.0001855	296.336	283.158	28.1703	0.119916	0.111637	-25.9221	1.32291	0.414996	-0.153299	0.414996	0.0157801
0.0001856	296.331	283.212	28.171	0.119983	0.11177	-27.2387	1.32289	0.414932	-0.15328	0.414932	0.0157196
0.0001857	296.327	283.274	28.1718	0.12006	0.111922	-28.5516	1.32287	0.414862	-0.153261	0.414862	0.015652
0.0001858	296.323	283.344	28.1727	0.120147	0.112093	-29.8609	1.32285	0.414784	-0.153241	0.414784	0.0155755
0.0001859	296.319	283.424	28.1738	0.120245	0.112288	-31.1666	1.32283	0.414702	-0.153221	0.414702	0.015493
0.000186	296.314	283.51	28.1749	0.120352	0.112499	-32.4677	1.32281	0.414626	-0.153201	0.414626	0.0154187
0.0001861	296.31	283.587	28.1759	0.120448	0.112689	-29.3327	1.32279	0.414558	-0.153182	0.414558	0.0153543
0.0001862	296.306	283.655	28.1768	0.120532	0.112854	-26.2013	1.32277	0.414511	-0.153164	0.414511	0.0153157
0.0001863	296.301	283.694	28.1773	0.12058	0.112949	-21.601	1.32276	0.414485	-0.153146	0.414485	0.0153019
0.0001864	296.297	283.706	28.1775	0.120595	0.112979	-17.0114	1.32274	0.414479	-0.15313	0.414479	0.0153127
0.0001865	296.293	283.691	28.1774	0.120577	0.112943	-12.4327	1.32272	0.414547	-0.153118	0.414547	0.0154132
0.0001866	296.289	283.579	28.176	0.120438	0.112669	-10.0403	1.3227	0.414606	-0.153105	0.414606	0.015503
0.0001867	296.284	283.479	28.1749	0.120314	0.112424	-7.69976	1.32268	0.414682	-0.153094	0.414682	0.0156139
0.0001868	296.28	283.357	28.1734	0.120162	0.112123	-6.11133	1.32266	0.414752	-0.153081	0.414752	0.0157167
0.0001869	296.276	283.243	28.172	0.120021	0.111845	-4.56294	1.32264	0.414814	-0.153069	0.414814	0.0158118
0.000187	296.271	283.138	28.1708	0.119891	0.111589	-3.05361	1.32262	0.414871	-0.153056	0.414871	0.0158991
0.0001871	296.267	283.042	28.1697	0.119772	0.111353	-1.58237	1.3226	0.414919	-0.153043	0.414919	0.0159769
0.0001872	296.263	282.956	28.1686	0.119666	0.111143	-0.148255	1.32258	0.414962	-0.153029	0.414962	0.0160481
0.0001873	296.259	282.878	28.1677	0.119568	0.11095	1.24048	1.32256	0.414998	-0.153015	0.414998	0.0161119
0.0001874	296.254	282.807	28.1669	0.119481	0.110777	2.62179	1.32254	0.415029	-0.153001	0.415029	0.016169
0.0001875	296.25	282.744	28.1662	0.119402	0.110622	3.99141	1.32253	0.415055	-0.152987	0.415055	0.0162187
0.0001876	296.246	282.688	28.1655	0.119333	0.110486	5.36171	1.32251	0.415073	-0.152972	0.415073	0.0162607
0.0001877	296.241	282.641	28.165	0.119275	0.11037	6.72829	1.32249	0.415086	-0.152957	0.415086	0.0162952
0.0001878	296.237	282.602	28.1646	0.119226	0.110274	8.09114	1.32247	0.4151	-0.152948	0.4151	0.0163232
0.0001879	296.233	282.57	28.1642	0.119187	0.110198	9.45027	1.32246	0.415095	-0.152941	0.415095	0.0163244
0.00018796	296.23	282.568	28.1642	0.119184	0.110192	9.45027	1.32245	0.415094	-0.152925	0.415094	0.0163414
0.000188	296.229	282.547	28.164	0.119159	0.110141	10.8057	1.32243	0.415087	-0.152909	0.415087	0.0163513
0.0001881	296.224	282.534	28.1639	0.119142	0.110108	12.1564	1.32241	0.415075	-0.152893	0.415075	0.0163555
0.0001882	296.22	282.527	28.1638	0.119133	0.11009	13.5043	1.32239	0.415058	-0.152876	0.415058	0.0163521
0.0001883	296.216	282.527	28.1639	0.119134	0.110092	14.8484	1.32237	0.415034	-0.152859	0.415034	0.0163412
0.0001884	296.211	282.536	28.1641	0.119145	0.110113	16.1888	1.32235	0.415004	-0.152842	0.415004	0.0163228
0.0001885	296.207	282.552	28.1643	0.119165	0.110154	17.5253	1.32233	0.414967	-0.152824	0.414967	0.0162951
0.0001886	296.203	282.579	28.1647	0.119198	0.110218	18.8572	1.32231	0.414926	-0.152806	0.414926	0.0162619
0.0001887	296.199	282.611	28.1651	0.119238	0.110297	20.1862	1.3223	0.414878	-0.152788	0.414878	0.0162212
0.0001888	296.194	282.651	28.1657	0.119287	0.110395	21.5115	1.32228	0.414825	-0.152769	0.414825	0.0161732
0.0001889	296.19	282.699	28.1663	0.119347	0.110513	22.8329	1.32226	0.414766	-0.15275	0.414766	0.016118
0.000189	296.186	282.755	28.1671	0.119416	0.110649	24.1505	1.32224	0.414701	-0.152731	0.414701	0.0160555
0.0001891	296.181	282.818	28.1679	0.119495	0.110804	25.4643	1.32222	0.414629	-0.152712	0.414629	0.0159858
0.0001892	296.177	282.889	28.1688	0.119583	0.110979	26.7743	1.3222	0.414552	-0.152692	0.414552	0.0159091
0.0001893	296.173	282.968	28.1699	0.119681	0.111172	28.0805	1.32218	0.41447	-0.152672	0.41447	0.0158253
0.0001894	296.169	283.055	28.171	0.119788	0.111385	29.3828	1.32216	0.414381	-0.152651	0.414381	0.0157346
0.0001895	296.164	283.149	28.1722	0.119905	0.111616	30.6813	1.32214	0.414287	-0.152631	0.414287	0.0156371
0.0001896	296.16	283.251	28.1735	0.120032	0.111866	31.9759	1.32212	0.414186	-0.15261	0.414186	0.0155327
0.0001897	296.156	283.361	28.1749	0.120168	0.112134	33.2667	1.3221	0.41408	-0.152588	0.41408	0.0154217
0.0001898	296.151	283.478	28.1764	0.120313	0.112422	34.5537	1.32209	0.413969	-0.152567	0.413969	0.0153041
0.0001899	296.147	283.603	28.178	0.120468	0.112728	35.8367	1.32207	0.41385	-0.152545	0.41385	0.0151783
0.00019	296.143	283.738	28.1797	0.120635	0.113057	37.115	1.32205	0.413739	-0.152523	0.413739	0.0150627
0.0001901	296.139	283.861	28.1813	0.120788	0.11336	33.9606	1.32203	0.413635	-0.152502	0.413635	0.0149565
0.0001902	296.134	283.975	28.1828	0.120929	0.113639	30.8101	1.32201	0.413553	-0.152482	0.413553	0.0148761
0.0001903	296.13	284.061	28.1839	0.121035	0.113849	26.1927	1.32199	0.413492	-0.152463	0.413492	0.0148203
0.0001904	296.126	284.12	28.1847	0.121108	0.113993	21.5868	1.32197	0.413451	-0.152445	0.413451	0.014789
0.0001905	296.121	284.151	28.1851	0.121148	0.114071	16.9925	1.32195	0.413536	-0.152434	0.413536	0.0149082
0.0001906	296.117	284.017	28.1835	0.120981	0.113741	14.5138	1.32193	0.413612	-0.152422	0.413612	0.0150167
0.0001907	296.113	283.895	28.182	0.120829	0.113442	12.0883	1.32191	0.413721	-0.152412	0.413721	0.0151662
0.0001908	296.109	283.728	28.18	0.120622	0.113033	10.3935	1.32189	0.413823	-0.152401	0.413823	0.0153074
0.0001909	296.104	283.571	28.1781	0.120428	0.112649	8.74129	1.32187	0.413918	-0.15239	0.413918	0.0154402
0.000191	296.1	283.424	28.1764	0.120246	0.112289	7.13072	1.32186	0.414005	-0.152379	0.414005	0.0155648
0.0001911	296.096	283.286	28.1747	0.120075	0.111951	5.56073	1.32184	0.414085	-0.152367	0.414085	0.0156812
0.0001912	296.091	283.158	28.1732	0.119916	0.111637	4.03032	1.32182	0.414159	-0.152356	0.414159	0.0157896
0.0001913	296.087	283.039	28.1717	0.119768	0.111345	2.53849	1.3218	0.414226	-0.152343	0.414226	0.0158901
0.0001914	296.083	282.928	28.1704	0.119631	0.111075	1.0843	1.32178	0.414286	-0.152331	0.414286	0.0159828
0.0001915	296.079	282.827	28.1692	0.119505	0.110825	-0.324197	1.32176	0.414338	-0.152318	0.414338	0.0160658
0.0001916	296.074	282.736	28.1681	0.119392	0.110602	-1.70943	1.32174	0.414385	-0.152304	0.414385	0.0161423
0.0001917	296.07	282.652	28.1672	0.119288	0.110396	-3.08314	1.32172	0.414425	-0.15229	0.414425	0.0162112
0.0001918	296.066	282.576	28.1663	0.119194	0.11021	-4.45248	1.3217	0.414467	-0.152283	0.414467	0.0162747
0.0001919	296.061	282.507	28.1655	0.119109	0.110042	-5.81836	1.32169	0.414462	-0.152277	0.414462	0.0162759
0.00019196	296.059	282.504	28.1655	0.119106	0.110036	-5.81836	1.32168	0.414489	-0.152262	0.414489	0.0163284
0.000192	296.057	282.446	28.1648	0.119033	0.109893	-7.18078	1.32166	0.41451	-0.152248	0.41451	0.0163737
0.0001921	296.053	282.396	28.1642	0.118971	0.109769	-8.53886	1.32165	0.414527	-0.152233	0.414527	0.0164134
0.0001922	296.049	282.351	28.1637	0.118915	0.10966	-9.89434	1.32163	0.414538	-0.152217	0.414538	0.0164455
0.0001923	296.044	282.314	28.1633	0.11887	0.10957	-11.2463	1.32161	0.414542	-0.152202	0.414542	0.01647
0.0001924	296.04	282.286	28.163	0.118835	0.109501	-12.5948	1.32159	0.41454	-0.152186	0.41454	0.0164849
0.0001925	296.036	282.267	28.1628	0.118811	0.109455	-13.9397	1.32157	0.414531	-0.15217	0.414531	0.0164933
0.0001926	296.031	282.256	28.1627	0.118797	0.109426	-15.2803	1.32155	0.414517	-0.152153	0.414517	0.0164941
0.0001927	296.027	282.252	28.1627	0.118793	0.109417	-16.6183	1.32153	0.414498	-0.152136	0.414498	0.0164882
0.0001928	296.023	282.255	28.1628	0.118797	0.109425	-17.9526	1.32151	0.414472	-0.152119	0.414472	0.0164749
0.0001929	296.019	282.266	28.163	0.11881	0.109453	-19.2835	1.32149	0.414441	-0.152102	0.414441	0.016454
0.000193	296.014	282.285	28.1633	0.118834	0.109499	-20.6108	1.32147	0.414403	-0.152084	0.414403	0.0164257
0.0001931	296.01	282.312	28.1637	0.118867	0.109565	-21.9345	1.32145	0.41436	-0.152066	0.41436	0.0163899
0.0001932	296.006	282.347	28.1641	0.11891	0.10965	-23.2547	1.32143	0.414311	-0.152048	0.414311	0.0163467
0.0001933	296.001	282.39	28.1647	0.118963	0.109755	-24.5713	1.32142	0.414255	-0.152029	0.414255	0.0162962
0.0001934	295.997	282.44	28.1654	0.119026	0.109878	-25.8844	1.3214	0.414194	-0.15201	0.414194	0.0162384
0.0001935	295.993	282.498	28.1662	0.119098	0.110021	-27.1938	1.32138	0.414127	-0.151991	0.414127	0.0161733
0.0001936	295.989	282.564	28.167	0.11918	0.110182	-28.4997	1.32136	0.414054	-0.151971	0.414054	0.0161011
0.0001937	295.984	282.638	28.168	0.119271	0.110363	-29.8019	1.32134	0.413974	-0.151951	0.413974	0.01602
0.0001938	295.98	282.721	28.1691	0.119374	0.110567	-31.1005	1.32132	0.41389	-0.151931	0.41389	0.0159336
0.0001939	295.976	282.81	28.1702	0.119485	0.110785	-32.3956	1.3213	0.4138	-0.15191	0.4138	0.0158403
0.000194	295.971	282.907	28.1715	0.119605	0.111022	-33.6861	1.32128	0.413715	-0.15189	0.413715	0.0157545
0.0001941	295.967	282.996	28.1726	0.119715	0.111241	-30.5457	1.32126	0.413639	-0.15187	0.413639	0.0156798
0.0001942	295.963	283.074	28.1736	0.119811	0.11143	-27.409	1.32124	0.413584	-0.151852	0.413584	0.0156302
0.0001943	295.959	283.124	28.1743	0.119874	0.111554	-22.8051	1.32122	0.413549	-0.151834	0.413549	0.0156056
0.0001944	295.954	283.148	28.1747	0.119903	0.111612	-18.212	1.32121	0.413553	-0.151819	0.413553	0.0156283
0.0001945	295.95	283.12	28.1744	0.119869	0.111545	-13.6296	1.32119	0.413606	-0.151806	0.413606	0.0157118
0.0001946	295.946	283.028	28.1733	0.119754	0.111318	-11.2194	1.32117	0.413656	-0.151792	0.413656	0.0157912
0.0001947	295.941	282.94	28.1722	0.119645	0.111102	-8.86124	1.32115	0.413715	-0.15178	0.413715	0.0158821
0.0001948	295.937	282.84	28.1711	0.119521	0.110857	-7.2509	1.32113	0.413766	-0.151767	0.413766	0.0159635
0.0001949	295.933	282.75	28.17	0.11941	0.110637	-5.68115	1.32111	0.413811	-0.151753	0.413811	0.0160384
0.000195	295.929	282.667	28.169	0.119307	0.110435	-4.15098	1.32109	0.41385	-0.151739	0.41385	0.0161058
[truncated: 14,402 more rows]

## Sheet: V1LLK
5.9745	327.921
5.97044	327.793
5.96634	327.696
5.94021	327.687
5.93152	326.66
5.9145	325.964
5.90643	325.154
5.9062	324.969
5.90617	324.836
5.90416	324.747
5.90327	324.333
5.90304	323.606
5.89825	323.405
5.88788	322.046
5.88717	321.929
5.88428	321.844
5.8822	321.765
5.87658	321.28
5.86623	320.855
5.86202	320.578
5.85698	320.544
5.85696	320.517
5.85459	320.223
5.84831	319.577
5.84236	319.574
5.8418	319.472
5.83277	319.417
5.82814	319.191
5.82701	318.265
5.82608	318.208
5.82352	318.128
5.82343	317.893
5.82274	317.55
5.82199	317.499
5.8162	317.439
5.80768	316.979
5.80753	316.525
5.80412	316.493
5.79801	316.418
5.79801	316.149
5.79034	316.009
5.78701	315.848
5.78271	315.81
5.77482	315.612
5.77298	315.569
5.7664	315.496
5.76455	315.229
5.75738	314.878
5.75083	314.703
5.74529	314.376
5.74186	314.368
5.74047	313.866
5.74026	313.629
5.73773	313.591
5.73653	313.474
5.73335	313.1
5.73238	313.012
5.73049	312.969
5.72713	312.797
5.71549	312.592
5.71136	312.487
5.70941	311.916
5.70855	311.892
5.70758	311.607
5.70756	311.578
5.70561	311.389
5.68802	311.27
5.68513	311.165
5.68402	311.144
5.67981	310.565
5.67826	310.474
5.67794	310.266
5.67544	310.119
5.67417	310.036
5.67168	310.035
5.66682	309.808
5.66671	309.646
5.66439	309.354
5.65914	308.976
5.65671	308.86
5.6447	308.737
5.64049	308.569
5.64037	308.115
5.64036	307.973
5.63904	307.86
5.6388	307.73
5.6377	307.709
5.6362	307.703
5.63443	307.132
5.63319	307.13
5.63051	307.006
5.62842	306.917
5.62644	306.884
5.62464	306.874
5.62416	306.844
5.62104	306.655
5.6198	306.444
5.61511	306.382
5.60607	306.248
5.60553	306.133
5.6049	305.827
5.60421	305.742
5.59609	305.556
5.58828	305.425
5.58797	305.106
5.5851	304.852
5.58141	304.601
5.58113	304.471
5.57599	304.408
5.57518	304.204
5.57409	304.119
5.57366	304.043
5.57358	303.977
5.57128	303.945
5.57041	303.808
5.56949	303.686
5.56852	303.651
5.56721	303.632
5.55976	303.595
5.55968	303.343
5.55935	303.276
5.55653	303.222
5.55478	302.998
5.55379	302.932
5.55197	302.823
5.55188	302.587
5.55066	302.498
5.54995	302.179
5.54692	302.124
5.54681	301.899
5.54046	301.818
5.54003	301.24
5.53987	301.138
5.53837	301.135
5.53778	301.047
5.53728	300.89
5.536	300.89
5.53399	300.886
5.53288	300.784
5.53283	300.674
5.52644	300.617
5.51814	300.472
5.51617	300.402
5.51526	300.253
5.50372	300.233
5.50012	300.094
5.49901	300.025
5.4982	299.943
5.49656	299.788
5.49323	299.725
5.4916	299.639
5.48335	299.628
5.48218	299.497
5.48012	299.496
5.47957	299.445
5.47755	299.42
5.47709	299.305
5.47292	299.08
5.47259	298.982
5.47013	298.855
5.46786	298.641
5.46506	298.521
5.46385	298.464
5.45713	298.337
5.45274	298.336
5.45173	298.197
5.45023	298.135
5.44901	298.109
5.44866	297.981
5.44766	297.558
5.44751	297.498
5.44233	297.45
5.4408	297.403
5.44059	297.397
5.43739	297.331
5.43439	297.254
5.42721	297.162
5.42646	297.099
5.42575	297.041
5.42443	297.009
5.42398	296.941
5.4237	296.914
5.42275	296.877
5.41421	296.741
5.41415	296.684
5.41304	296.443
5.41281	296.35
5.41223	296.308
5.41172	296.16
5.41139	296.12
5.41131	296.11
5.40877	296.026
5.40624	295.6
5.4029	295.566
5.39993	295.417
5.3995	295.36
5.39844	295.243
5.39818	295.16
5.39739	295.147
5.39711	294.931
5.39624	294.905
5.39554	294.864
5.39551	294.821
5.39286	294.754
5.39043	294.743
5.3886	294.679
5.3816	294.341
5.38145	294.292
5.38133	294.266
5.37917	294.109
5.37513	294.061
5.37248	293.984
5.36544	293.91
5.36404	293.883
5.36326	293.858
5.36307	293.848
5.3625	293.819
5.36197	293.404
5.35703	293.289
5.35513	292.981
5.3536	292.921
5.3534	292.874
5.35309	292.853
5.35199	292.748
5.35047	292.729
5.3491	292.659
5.34784	292.614
5.34766	292.576
5.34311	292.553
5.34144	292.44
5.34099	292.33
5.34047	292.296
5.33714	292.241
5.33664	292.025
5.33183	291.977
5.33068	291.878
5.3293	291.836
5.32868	291.754
5.32494	291.682
5.32456	291.513
5.32373	291.505
5.32368	291.423
5.32321	291.353
5.32254	291.26
5.32241	291.116
5.32152	291.099
5.32138	291.075
5.32013	291.035
5.31869	290.847
5.31689	290.599
5.31516	290.574
5.31441	290.54
5.31436	290.508
5.31418	290.455
5.31258	289.971
5.30893	289.969
5.30767	289.929
5.30444	289.56
5.30185	289.301
5.29718	289.247
5.29672	289.245
5.29487	288.628
5.29481	288.548
5.29464	288.523
5.29397	288.491
5.29042	288.021
5.29003	287.91
5.28963	287.842
5.28922	287.833
5.28749	287.821
5.28748	287.78
5.28708	287.696
5.28534	287.614
5.28436	287.425
5.2828	287.223
5.28128	287.06
5.27884	287.051
5.27814	286.878
5.27751	286.839
5.27688	286.8
5.2755	286.762
5.27509	286.682
5.27418	286.613
5.27349	286.424
5.27332	286.264
5.2724	286.188
5.27169	286.107
5.27138	285.89
5.2709	285.86
5.2705	285.769
5.2697	285.697
5.26846	285.689
5.26729	285.688
5.26653	285.585
5.26549	285.559
5.2611	285.366
5.26069	285.338
5.25931	285.332
5.25898	285.3
5.2585	285.247
5.25785	285.214
5.25645	285.212
5.2563	285.164
5.25487	285.116
5.25394	285.112
5.24953	285.087
5.24901	285.086
5.24853	284.582
5.24709	284.507
5.24466	284.44
5.24196	284.021
5.24145	283.822
5.24008	283.82
5.23861	283.807
5.23697	283.803
5.2365	283.791
5.23413	283.75
5.2327	283.717
5.23051	283.655
5.2296	283.571
5.22793	283.499
5.2246	283.465
5.2241	283.393
5.22374	283.337
5.22208	283.112
5.22005	283.105
5.21894	283.069
5.21758	282.923
5.21669	282.918
5.21163	282.73
5.21042	282.697
5.20999	282.685
5.20998	282.655
5.20997	282.598
5.20907	282.569
5.20886	282.534
5.20806	282.493
5.2071	282.312
5.20407	282.244
5.20335	282.22
5.20214	282.198
5.20204	282.171
5.20179	282.135
5.20171	282.117
5.20171	282.111
5.20143	282.071
5.19871	281.962
5.19869	281.872
5.19867	281.859
5.19829	281.811
5.19776	281.793
5.1974	281.788
5.19402	281.623
5.19232	281.561
5.19102	281.403
5.18913	281.307
5.18867	281.276
5.18689	281.272
5.18657	281.209
5.18635	281.087
5.18581	281.047
5.18393	281.033
5.18166	280.996
5.17821	280.905
5.17576	280.884
5.17555	280.847
5.17533	280.738
5.17386	280.543
5.17337	280.539
5.1724	280.501
5.17175	280.452
5.16826	280.421
5.1675	280.293
5.16561	280.146
5.16555	280.015
5.16453	279.847
5.16298	279.729
5.16296	279.724
5.1623	279.681
5.16107	279.431
5.15902	279.374
5.15796	279.367
5.15596	279.332
5.15515	279.288
5.1546	279.214
5.15453	279.141
5.15449	279.063
5.15398	279.019
5.15357	278.995
5.15019	278.868
5.14962	278.868
5.14784	278.861
5.14091	278.837
5.13758	278.586
5.13732	278.502
5.13731	278.343
5.13149	278.312
5.1293	278.256
5.12824	278.205
5.12138	278.175
5.12123	278.158
5.12019	278.12
5.11793	278.108
5.11682	278.1
5.11668	278.088
5.11527	277.997
5.11511	277.869
5.11509	277.68
5.11388	277.575
5.11327	277.569
5.11312	277.519
5.11306	277.486
5.11173	277.411
5.10958	277.275
5.10935	277.202
5.10771	277.122
5.10725	277.066
5.10662	276.924
5.10589	276.516
5.10388	276.455
5.10137	276.375
5.09849	276.217
5.09709	276.173
5.09642	276.095
5.09395	276.057
5.0938	276.05
5.09353	275.907
5.08905	275.691
5.0882	275.527
5.08711	275.389
5.08617	275.227
5.0853	275.224
5.08363	275.135
5.08255	275.109
5.08253	275.068
5.08007	275.063
5.07939	275.046
5.07804	275.023
5.07797	274.918
5.07723	274.91
5.07538	274.892
5.07495	274.878
5.07325	274.789
5.07321	274.772
5.07289	274.476
5.0723	274.453
5.07187	274.172
5.0718	274.17
5.07027	274.116
5.06713	274.069
5.06648	273.887
5.06621	273.874
5.0662	273.745
5.06591	273.716
5.06397	273.616
5.06307	273.547
5.0612	273.488
5.0607	273.431
5.06068	273.374
5.06053	273.294
5.058	273.287
5.05746	273.192
5.05604	273.191
5.0559	273.16
5.053	273.142
5.04904	273.032
5.04783	272.884
5.04689	272.667
5.04627	272.638
5.04379	272.611
5.04331	272.608
5.04204	272.557
5.0414	272.421
5.04024	272.372
5.03962	272.35
5.0393	272.28
5.03919	272.254
5.0389	272.248
5.03835	272.241
5.03818	272.227
5.0381	272.194
5.03487	272.141
5.03291	272.075
5.02587	272.047
5.02567	271.994
5.02169	271.772
5.02001	271.761
5.01902	271.689
5.01896	271.639
5.01669	271.544
5.01534	271.508
5.01434	271.482
5.01434	271.436
5.01381	271.436
5.01235	271.349
5.01196	271.336
5.0119	271.217
5.01125	271.136
5.01025	270.956
5.00996	270.95
5.00952	270.875
5.00707	270.821
5.00657	270.776
5.00629	270.592
5.00582	270.554
5.00554	270.503
5.00465	270.499
5.00334	270.44
5.00283	270.279
5.00163	270.165
5.00154	270.085
5.00054	270
4.99946	269.921
4.99791	269.877
4.99642	269.861
4.99607	269.785
4.99546	269.75
4.99264	269.578
4.99222	269.508
4.98968	269.484
4.98955	269.392
4.98831	269.269
4.98786	269.173
4.98754	269.136
4.98724	269.105
4.98585	269.029
4.98561	269.004
4.98479	268.905
4.98452	268.85
4.98437	268.784
4.98391	268.763
4.98376	268.666
4.98305	268.414
4.98159	268.403
4.98158	268.388
4.98059	268.348
4.97891	268.265
4.97626	268.239
4.97558	268.201
4.97539	268.102
4.97389	268.066
4.9733	267.988
4.97029	267.968
4.96931	267.834
4.96651	267.761
4.9643	267.749
4.96422	267.454
4.96388	267.341
4.96008	267.29
4.9577	267.243
4.95713	267.192
4.95543	267.187
4.95173	267.179
4.95161	267.075
4.95028	267.06
4.949	267.004
4.9468	266.942
4.94558	266.898
4.94485	266.769
4.94386	266.628
4.94324	266.594
4.94297	266.336
4.94282	266.261
4.93895	266.134
4.93824	265.932
4.93667	265.857
4.93605	265.792
4.93469	265.731
4.9345	265.651
4.93441	265.509
4.93155	265.346
4.93101	265.325
4.92888	265.271
4.92881	265.267
4.92672	265.18
4.92553	265.131
4.92497	265.118
4.92287	265.11
4.92191	265.098
4.92189	265.085
4.9213	264.886
4.91987	264.845
4.91877	264.715
4.91783	264.694
4.9175	264.637
4.91739	264.631
4.91532	264.514
4.91314	264.508
4.91303	264.502
4.90993	264.389
4.90794	264.374
4.90743	264.301
4.90523	264.245
4.89965	264.176
4.89889	264.148
4.89852	264.112
4.89702	264.094
4.8967	264.05
4.89635	264.017
4.89562	263.976
4.89506	263.79
4.89424	263.738
4.89423	263.703
4.89387	263.669
4.89275	263.608
4.89203	263.579
4.8901	263.561
4.887	263.43
4.88582	263.367
4.88557	263.337
4.8843	263.278
4.88395	263.166
4.8833	263.065
4.8821	263.021
4.88084	262.939
4.88064	262.691
4.87866	262.592
4.87705	262.591
4.8746	262.438
4.87268	262.368
4.86819	262.33
4.86699	262.158
4.86642	262.068
4.86579	262.022
4.86566	261.996
4.86509	261.835
4.8632	261.792
4.86105	261.76
4.86063	261.7
4.86026	261.665
4.8598	261.462
4.85921	261.363
4.85877	261.329
4.85631	261.271
4.85332	261.197
4.85318	261.028
4.85305	260.922
4.85283	260.85
4.85051	260.756
4.84999	260.708
4.84982	260.699
4.84978	260.693
4.84959	260.607
4.84926	260.602
4.84761	260.574
4.84679	260.549
4.8413	260.523
4.84054	260.521
4.83995	260.496
4.83795	260.235
4.83505	260.23
4.83298	260.201
4.82922	260.13
4.82908	260.028
4.82874	260.019
4.8274	259.972
4.82607	259.937
4.82555	259.93
4.82374	259.846
4.82166	259.834
4.81936	259.745
4.81879	259.711
4.81669	259.598
4.81636	259.408
4.81545	259.368
4.81485	259.297
4.81141	259.279
4.81075	259.27
4.80923	259.209
4.80848	259.157
4.80833	259.123
4.8075	259.059
4.80734	258.975
4.80706	258.866
4.80378	258.833
4.8036	258.816
4.80221	258.804
4.79827	258.784
4.79711	258.731
4.79636	258.347
4.79461	258.291
4.7932	258.049
4.79285	257.933
4.7924	257.873
4.79108	257.831
4.7905	257.708
4.78955	257.643
4.78894	257.538
4.78848	257.371
4.78716	257.364
4.78612	257.349
4.78554	257.22
4.78392	257.212
4.78351	257.206
4.78316	257.069
4.78305	257.069
4.78271	257.033
4.78222	256.953
4.78074	256.943
4.77936	256.9
4.77917	256.886
4.77843	256.874
4.77759	256.786
4.77719	256.507
4.77485	256.496
4.77349	256.482
4.77158	256.172
4.77139	256.164
4.77102	256.086
4.77102	255.891
4.77074	255.854
4.76761	255.762
4.76684	255.747
4.76312	255.716
4.76277	255.707
4.76097	255.652
4.76011	255.623
4.75989	255.616
4.75926	255.611
4.75729	255.534
4.75155	255.161
4.75093	255.08
4.7507	254.923
4.75068	254.595
4.7503	254.585
4.7497	254.58
4.74876	254.557
4.74868	254.552
4.74661	254.452
4.74578	254.412
4.74453	254.3
4.74424	254.295
4.74372	254.214
4.74134	254.113
4.74008	254.092
4.73936	254.002
4.73853	253.889
4.73777	253.748
4.7367	253.535
4.73143	253.446
4.72556	253.296
4.72305	253.098
4.72069	252.998
4.71998	252.825
4.71954	252.819
4.71884	252.765
4.71601	252.716
4.71545	252.644
4.71515	252.539
4.71399	252.535
4.71288	252.45
4.71272	252.242
4.71262	251.953
4.7086	251.795
4.70825	251.775
4.70706	251.76
4.70546	251.738
4.70225	251.707
4.70116	251.624
4.70053	251.297
4.69933	251.267
4.69715	251.249
4.69448	251.243
4.69053	251.208
4.68144	251.101
4.68111	251.08
4.67716	251.077
4.67487	250.951
4.67472	250.874
4.67297	250.669
4.67199	250.56
4.6695	250.507
4.6693	250.478
4.66912	250.423
4.66896	250.377
4.66855	250.37
4.66726	250.208
4.6657	250.137
4.6655	250.112
4.66029	249.934
4.66019	249.8
4.65986	249.481
4.65659	249.392
4.65614	249.284
4.65132	249.133
4.64885	248.839
4.64436	248.774
4.64099	248.66
4.63946	248.64
4.63799	248.559
4.63784	248.543
4.63673	248.533
4.63649	248.497
4.6354	248.46
4.63527	248.324
4.62613	248.11
4.62588	247.979
4.62484	247.97
4.62395	247.694
4.62358	247.661
4.62186	247.569
4.62085	247.346
4.61978	247.296
4.61896	247.294
4.61876	246.904
4.61502	246.891
4.61449	246.708
4.61383	246.648
4.61342	246.616
4.61123	246.375
4.60887	246.278
4.60853	246.273
4.60499	246.24
4.60334	246.235
4.60257	246.142
4.60255	246.131
4.59992	246.089
4.59748	245.965
4.59545	245.844
4.59543	245.795
4.59449	245.782
4.59037	245.739
4.58985	245.718
4.58392	245.677
4.5792	245.339
4.57684	245.196
4.57488	245.168
4.57432	245.096
4.57403	245.084
4.57347	244.982
4.57143	244.765
4.57056	244.695
4.5674	244.638
4.5653	244.632
4.55993	244.622
4.5588	244.571
4.55823	244.556
4.55207	244.544
4.55004	244.516
4.54824	244.399
4.54677	244.341
4.5435	243.945
4.54303	243.887
4.54251	243.807
4.53795	243.685
4.5373	243.513
4.53706	243.32
4.53393	243.233
4.53371	243.135
4.53088	242.797
4.52848	242.761
4.52703	242.709
4.52609	242.699
4.52501	242.539
4.52154	242.354
4.52126	242.144
4.51593	242.031
4.50948	241.86
4.50576	241.791
4.49647	241.511
4.48747	241.471
4.4863	241.033
4.4857	240.955
4.48561	240.944
4.48244	240.807
4.4802	240.662
4.47982	240.602
4.47955	240.494
4.47946	240.421
4.47794	240.262
4.47626	240.081
4.47586	240.029
4.47552	239.974
4.47253	239.903
4.47069	239.748
4.47053	239.623
4.46796	239.544
4.46723	239.528
4.46527	239.454
4.46335	239.076
4.46231	238.974
4.46065	238.842
4.46007	238.796
4.4596	238.598
4.45577	238.28
4.45434	238.235
4.45113	238.103
4.44918	238.086
4.44854	237.989
4.4484	237.921
4.44589	237.862
4.44454	237.421
4.4426	237.403
4.44135	237.385
4.44064	237.259
4.43398	237.206
4.43296	237.141
4.42792	236.733
4.42402	236.471
4.42245	236.124
4.41921	236.064
4.41607	236.021
4.41607	236.002
4.41274	235.987
4.41003	235.987
4.40489	235.782
4.40226	235.576
4.39889	235.45
4.39379	235.394
4.39309	235.267
4.39149	235.263
4.38901	235.256
4.38599	234.579
4.38145	234.522
4.37364	234.488
4.37011	234.378
4.37007	234.224
4.36901	233.744
4.36772	233.535
4.36351	233.476
4.3621	233.364
4.36077	233.217
4.35855	233.103
4.35752	232.931
4.35449	232.877
4.35448	232.75
4.35225	232.679
4.35215	232.626
4.34808	232.423
4.33982	232.324
4.33975	231.893
4.33969	231.656
4.33454	231.29
4.33253	231.157
4.32735	231.105
4.32565	230.957
4.32023	230.927
4.3131	230.729
4.31142	230.722
4.31095	230.621
4.30871	230.174
4.30249	230.16
4.29993	230.118
4.29963	229.557
4.29824	229.55
4.29336	229.228
4.29146	229.114
4.29007	229.062
4.28971	228.714
4.28806	228.357
4.28782	228.259
4.2833	228.145
4.27982	227.902
4.27813	227.747
4.27773	227.739
4.27303	227.031
4.27259	226.84
4.26684	226.632
4.26304	226.49
4.26071	226.314
4.2538	226.18
4.25044	226.155
4.24783	226.072
4.23698	225.801
4.23074	225.662
4.21567	225.26
4.21116	225.119
4.2075	224.868
4.20619	224.85
4.20272	224.621
4.2013	224.234
4.18184	223.938
4.17829	223.165
4.17489	222.683
4.17139	222.557
4.17102	221.393
4.1636	221.332
4.15891	220.923
4.15772	220.408
4.1565	220.049
4.1558	219.949
4.15313	219.922
4.14334	219.899
4.14119	219.611
4.13485	219.217
4.12843	219.026
4.12696	218.529
4.12196	216.956
4.10834	216.783
4.09727	216.681
4.08985	216.285
4.08643	215.684
4.08288	214.941
4.04607	214.907
4.03937	214.021
4.03741	213.847
4.02637	212.881
4.01381	212.751
4.01081	212.205
4.00864	210.23

## Sheet: CII MATRIX
-0.0359061	-0.0358272	-0.0357666	-0.0357614	-0.0351245	-0.0346929	-0.0341909	-0.034076	-0.0339939	-0.0339386	-0.0336821	-0.0332315	-0.0331066	-0.0322641	-0.032192	-0.0321389	-0.03209	-0.0317894	-0.031526	-0.031354	-0.0313331	-0.0313165	-0.0311342	-0.0307339	-0.0307319	-0.0306687	-0.0306344	-0.0304944	-0.0299204	-0.0298847	-0.0298352	-0.0296897	-0.029477	-0.0294457	-0.0294082	-0.0291229	-0.0288418	-0.0288221	-0.0287756	-0.0286087	-0.0285216	-0.0284222	-0.0283982	-0.028276	-0.028249	-0.0282037	-0.0280383	-0.0278207	-0.0277121	-0.0275095
-0.0359305	-0.0358516	-0.0357909	-0.0357857	-0.0351484	-0.0347165	-0.0342142	-0.0340992	-0.034017	-0.0339617	-0.033705	-0.0332541	-0.0331292	-0.032286	-0.032214	-0.0321608	-0.0321119	-0.0318111	-0.0315474	-0.0313753	-0.0313544	-0.0313378	-0.0311554	-0.0307548	-0.0307528	-0.0306896	-0.0306552	-0.0305151	-0.0299407	-0.0299051	-0.0298555	-0.0297099	-0.0294971	-0.0294658	-0.0294283	-0.0291427	-0.0288615	-0.0288417	-0.0287952	-0.0286282	-0.028541	-0.0284415	-0.0284175	-0.0282952	-0.0282683	-0.0282229	-0.0280574	-0.0278396	-0.027731	-0.0275282
-0.0359552	-0.0358762	-0.0358155	-0.0358103	-0.0351726	-0.0347404	-0.0342377	-0.0341227	-0.0340404	-0.033985	-0.0337282	-0.0332769	-0.0331519	-0.0323082	-0.0322361	-0.0321829	-0.032134	-0.0318329	-0.0315691	-0.0313969	-0.031376	-0.0313593	-0.0311768	-0.030776	-0.0307739	-0.0307107	-0.0306763	-0.0305361	-0.0299613	-0.0299256	-0.029876	-0.0297303	-0.0295174	-0.029486	-0.0294485	-0.0291628	-0.0288813	-0.0288615	-0.028815	-0.0286479	-0.0285606	-0.0284611	-0.0284371	-0.0283147	-0.0282877	-0.0282423	-0.0280767	-0.0278588	-0.02775	-0.0275471
-0.0361133	-0.036034	-0.0359731	-0.0359679	-0.0353273	-0.0348932	-0.0343883	-0.0342728	-0.0341902	-0.0341345	-0.0338766	-0.0334233	-0.0332978	-0.0324504	-0.0323779	-0.0323244	-0.0322753	-0.031973	-0.0317079	-0.031535	-0.031514	-0.0314973	-0.0313139	-0.0309113	-0.0309093	-0.0308457	-0.0308113	-0.0306704	-0.0300931	-0.0300573	-0.0300074	-0.0298611	-0.0296472	-0.0296157	-0.029578	-0.029291	-0.0290083	-0.0289884	-0.0289417	-0.0287739	-0.0286862	-0.0285863	-0.0285621	-0.0284392	-0.0284121	-0.0283665	-0.0282002	-0.0279813	-0.0278721	-0.0276683
-0.0361662	-0.0360868	-0.0360258	-0.0360205	-0.035379	-0.0349443	-0.0344387	-0.034323	-0.0342402	-0.0341845	-0.0339262	-0.0334723	-0.0333465	-0.0324979	-0.0324253	-0.0323718	-0.0323226	-0.0320198	-0.0317544	-0.0315812	-0.0315601	-0.0315434	-0.0313598	-0.0309566	-0.0309546	-0.0308909	-0.0308564	-0.0307154	-0.0301372	-0.0301013	-0.0300514	-0.0299049	-0.0296906	-0.0296591	-0.0296214	-0.0293339	-0.0290508	-0.0290309	-0.0289841	-0.028816	-0.0287283	-0.0286282	-0.028604	-0.0284809	-0.0284537	-0.0284081	-0.0282415	-0.0280223	-0.0279129	-0.0277088
-0.0362703	-0.0361907	-0.0361294	-0.0361242	-0.0354808	-0.0350449	-0.0345378	-0.0344217	-0.0343388	-0.0342829	-0.0340238	-0.0335686	-0.0334425	-0.0325914	-0.0325186	-0.0324649	-0.0324156	-0.032112	-0.0318458	-0.0316721	-0.031651	-0.0316342	-0.03145	-0.0310457	-0.0310437	-0.0309798	-0.0309452	-0.0308038	-0.0302239	-0.0301879	-0.0301379	-0.0299909	-0.0297761	-0.0297445	-0.0297066	-0.0294184	-0.0291345	-0.0291145	-0.0290675	-0.028899	-0.0288109	-0.0287105	-0.0286863	-0.0285628	-0.0285356	-0.0284899	-0.0283228	-0.0281029	-0.0279932	-0.0277886
-0.0363199	-0.0362401	-0.0361788	-0.0361735	-0.0355293	-0.0350927	-0.034585	-0.0344688	-0.0343857	-0.0343297	-0.0340703	-0.0336144	-0.0334882	-0.0326359	-0.032563	-0.0325093	-0.0324599	-0.0321558	-0.0318893	-0.0317153	-0.0316942	-0.0316774	-0.031493	-0.0310881	-0.031086	-0.0310221	-0.0309875	-0.0308458	-0.0302652	-0.0302292	-0.030179	-0.0300319	-0.0298167	-0.0297851	-0.0297472	-0.0294585	-0.0291742	-0.0291542	-0.0291072	-0.0289384	-0.0288503	-0.0287498	-0.0287255	-0.0286018	-0.0285746	-0.0285288	-0.0283615	-0.0281413	-0.0280315	-0.0278265
-0.0363213	-0.0362415	-0.0361802	-0.036175	-0.0355307	-0.0350941	-0.0345863	-0.0344701	-0.034387	-0.0343311	-0.0340716	-0.0336158	-0.0334895	-0.0326372	-0.0325643	-0.0325106	-0.0324611	-0.0321571	-0.0318905	-0.0317166	-0.0316954	-0.0316786	-0.0314942	-0.0310893	-0.0310873	-0.0310234	-0.0309887	-0.030847	-0.0302664	-0.0302303	-0.0301802	-0.0300331	-0.0298179	-0.0297862	-0.0297483	-0.0294597	-0.0291754	-0.0291554	-0.0291084	-0.0289396	-0.0288514	-0.0287509	-0.0287266	-0.028603	-0.0285757	-0.0285299	-0.0283626	-0.0281424	-0.0280326	-0.0278276
-0.0363215	-0.0362417	-0.0361804	-0.0361751	-0.0355309	-0.0350943	-0.0345865	-0.0344703	-0.0343872	-0.0343312	-0.0340718	-0.0336159	-0.0334897	-0.0326374	-0.0325645	-0.0325107	-0.0324613	-0.0321572	-0.0318907	-0.0317167	-0.0316956	-0.0316788	-0.0314944	-0.0310895	-0.0310874	-0.0310235	-0.0309888	-0.0308472	-0.0302665	-0.0302305	-0.0301804	-0.0300332	-0.029818	-0.0297864	-0.0297485	-0.0294598	-0.0291755	-0.0291555	-0.0291085	-0.0289397	-0.0288516	-0.028751	-0.0287267	-0.0286031	-0.0285759	-0.02853	-0.0283627	-0.0281426	-0.0280327	-0.0278277
-0.0363339	-0.0362541	-0.0361927	-0.0361875	-0.035543	-0.0351063	-0.0345983	-0.0344821	-0.0343989	-0.034343	-0.0340834	-0.0336274	-0.0335011	-0.0326485	-0.0325756	-0.0325218	-0.0324724	-0.0321682	-0.0319016	-0.0317276	-0.0317064	-0.0316896	-0.0315051	-0.0311001	-0.031098	-0.0310341	-0.0309994	-0.0308577	-0.0302769	-0.0302408	-0.0301907	-0.0300435	-0.0298282	-0.0297966	-0.0297586	-0.0294699	-0.0291855	-0.0291655	-0.0291185	-0.0289496	-0.0288614	-0.0287608	-0.0287366	-0.0286129	-0.0285856	-0.0285398	-0.0283724	-0.0281522	-0.0280423	-0.0278373
-0.0363393	-0.0362595	-0.0361981	-0.0361929	-0.0355483	-0.0351115	-0.0346035	-0.0344872	-0.0344041	-0.0343481	-0.0340885	-0.0336324	-0.0335061	-0.0326534	-0.0325805	-0.0325267	-0.0324772	-0.032173	-0.0319063	-0.0317323	-0.0317111	-0.0316944	-0.0315098	-0.0311047	-0.0311027	-0.0310387	-0.031004	-0.0308623	-0.0302814	-0.0302453	-0.0301952	-0.030048	-0.0298327	-0.029801	-0.0297631	-0.0294743	-0.0291899	-0.0291698	-0.0291228	-0.0289539	-0.0288657	-0.0287651	-0.0287408	-0.0286172	-0.0285899	-0.028544	-0.0283767	-0.0281564	-0.0280465	-0.0278414
-0.0363408	-0.0362609	-0.0361996	-0.0361944	-0.0355497	-0.0351129	-0.0346049	-0.0344886	-0.0344055	-0.0343495	-0.0340899	-0.0336338	-0.0335075	-0.0326547	-0.0325818	-0.032528	-0.0324785	-0.0321743	-0.0319076	-0.0317336	-0.0317124	-0.0316956	-0.0315111	-0.031106	-0.0311039	-0.03104	-0.0310053	-0.0308636	-0.0302826	-0.0302466	-0.0301964	-0.0300492	-0.0298339	-0.0298022	-0.0297643	-0.0294755	-0.029191	-0.029171	-0.029124	-0.0289551	-0.0288669	-0.0287663	-0.028742	-0.0286183	-0.028591	-0.0285452	-0.0283778	-0.0281575	-0.0280476	-0.0278425
-0.0363703	-0.0362904	-0.036229	-0.0362237	-0.0355786	-0.0351414	-0.034633	-0.0345166	-0.0344334	-0.0343773	-0.0341176	-0.0336611	-0.0335347	-0.0326812	-0.0326082	-0.0325544	-0.0325049	-0.0322004	-0.0319335	-0.0317593	-0.0317382	-0.0317214	-0.0315367	-0.0311312	-0.0311292	-0.0310652	-0.0310305	-0.0308886	-0.0303072	-0.0302711	-0.0302209	-0.0300736	-0.0298581	-0.0298264	-0.0297884	-0.0294994	-0.0292147	-0.0291947	-0.0291476	-0.0289786	-0.0288903	-0.0287896	-0.0287653	-0.0286415	-0.0286142	-0.0285684	-0.0284008	-0.0281804	-0.0280704	-0.0278651
-0.0364343	-0.0363543	-0.0362928	-0.0362876	-0.0356413	-0.0352033	-0.034694	-0.0345774	-0.0344941	-0.0344379	-0.0341777	-0.0337204	-0.0335937	-0.0327388	-0.0326657	-0.0326117	-0.0325622	-0.0322572	-0.0319898	-0.0318153	-0.0317941	-0.0317772	-0.0315922	-0.0311861	-0.031184	-0.0311199	-0.0310851	-0.030943	-0.0303606	-0.0303244	-0.0302742	-0.0301265	-0.0299107	-0.029879	-0.0298409	-0.0295514	-0.0292662	-0.0292461	-0.029199	-0.0290296	-0.0289412	-0.0288404	-0.028816	-0.028692	-0.0286647	-0.0286187	-0.0284509	-0.02823	-0.0281198	-0.0279142
-0.0364387	-0.0363587	-0.0362972	-0.0362919	-0.0356456	-0.0352075	-0.0346981	-0.0345815	-0.0344982	-0.034442	-0.0341818	-0.0337244	-0.0335978	-0.0327427	-0.0326696	-0.0326157	-0.0325661	-0.032261	-0.0319936	-0.0318191	-0.0317979	-0.0317811	-0.031596	-0.0311898	-0.0311878	-0.0311236	-0.0310889	-0.0309468	-0.0303642	-0.0303281	-0.0302778	-0.0301301	-0.0299143	-0.0298825	-0.0298445	-0.0295549	-0.0292697	-0.0292496	-0.0292025	-0.0290331	-0.0289447	-0.0288438	-0.0288195	-0.0286954	-0.0286681	-0.0286221	-0.0284543	-0.0282334	-0.0281232	-0.0279176
-0.0364566	-0.0363765	-0.036315	-0.0363097	-0.0356631	-0.0352249	-0.0347152	-0.0345985	-0.0345152	-0.034459	-0.0341986	-0.033741	-0.0336143	-0.0327588	-0.0326857	-0.0326317	-0.0325821	-0.0322769	-0.0320094	-0.0318347	-0.0318135	-0.0317967	-0.0316116	-0.0312052	-0.0312031	-0.0311389	-0.0311041	-0.030962	-0.0303792	-0.030343	-0.0302927	-0.030145	-0.029929	-0.0298972	-0.0298592	-0.0295695	-0.0292841	-0.029264	-0.0292168	-0.0290474	-0.0289589	-0.028858	-0.0288336	-0.0287095	-0.0286822	-0.0286362	-0.0284683	-0.0282473	-0.028137	-0.0279313
-0.0364695	-0.0363894	-0.0363278	-0.0363226	-0.0356757	-0.0352373	-0.0347274	-0.0346107	-0.0345273	-0.0344711	-0.0342106	-0.0337529	-0.0336261	-0.0327704	-0.0326972	-0.0326432	-0.0325936	-0.0322883	-0.0320206	-0.031846	-0.0318247	-0.0318079	-0.0316227	-0.0312162	-0.0312141	-0.0311499	-0.0311151	-0.0309729	-0.0303899	-0.0303537	-0.0303034	-0.0301556	-0.0299395	-0.0299078	-0.0298697	-0.0295799	-0.0292944	-0.0292743	-0.0292271	-0.0290576	-0.0289691	-0.0288682	-0.0288438	-0.0287197	-0.0286923	-0.0286463	-0.0284783	-0.0282572	-0.0281469	-0.0279411
-0.0365044	-0.0364242	-0.0363626	-0.0363573	-0.0357098	-0.035271	-0.0347607	-0.0346439	-0.0345604	-0.0345041	-0.0342434	-0.0337852	-0.0336583	-0.0328017	-0.0327285	-0.0326744	-0.0326248	-0.0323192	-0.0320513	-0.0318765	-0.0318552	-0.0318383	-0.031653	-0.031246	-0.031244	-0.0311797	-0.0311449	-0.0310025	-0.0304189	-0.0303827	-0.0303324	-0.0301845	-0.0299682	-0.0299364	-0.0298983	-0.0296082	-0.0293225	-0.0293023	-0.0292551	-0.0290854	-0.0289968	-0.0288958	-0.0288714	-0.0287472	-0.0287198	-0.0286737	-0.0285056	-0.0282843	-0.0281739	-0.0279679
-0.0365688	-0.0364885	-0.0364268	-0.0364215	-0.0357728	-0.0353332	-0.034822	-0.034705	-0.0346214	-0.034565	-0.0343038	-0.0338448	-0.0337177	-0.0328596	-0.0327862	-0.0327321	-0.0326823	-0.0323762	-0.0321078	-0.0319327	-0.0319114	-0.0318945	-0.0317088	-0.0313012	-0.0312991	-0.0312348	-0.0311998	-0.0310572	-0.0304726	-0.0304363	-0.0303859	-0.0302377	-0.0300211	-0.0299892	-0.0299511	-0.0296604	-0.0293742	-0.029354	-0.0293067	-0.0291368	-0.029048	-0.0289468	-0.0289224	-0.0287979	-0.0287704	-0.0287243	-0.0285559	-0.0283342	-0.0282236	-0.0280172
-0.0365951	-0.0365147	-0.0364529	-0.0364476	-0.0357985	-0.0353586	-0.034847	-0.0347299	-0.0346462	-0.0345898	-0.0343284	-0.0338691	-0.0337419	-0.0328832	-0.0328098	-0.0327556	-0.0327058	-0.0323995	-0.0321309	-0.0319556	-0.0319343	-0.0319174	-0.0317316	-0.0313236	-0.0313216	-0.0312572	-0.0312222	-0.0310795	-0.0304945	-0.0304582	-0.0304077	-0.0302594	-0.0300426	-0.0300108	-0.0299726	-0.0296817	-0.0293953	-0.0293751	-0.0293278	-0.0291577	-0.0290689	-0.0289676	-0.0289431	-0.0288186	-0.0287911	-0.0287449	-0.0285764	-0.0283545	-0.0282439	-0.0280374
-0.0366265	-0.0365461	-0.0364842	-0.036479	-0.0358293	-0.035389	-0.034877	-0.0347598	-0.034676	-0.0346196	-0.034358	-0.0338983	-0.0337709	-0.0329115	-0.032838	-0.0327838	-0.0327339	-0.0324273	-0.0321585	-0.0319831	-0.0319618	-0.0319449	-0.0317589	-0.0313506	-0.0313485	-0.0312841	-0.0312491	-0.0311063	-0.0305207	-0.0304844	-0.0304338	-0.0302854	-0.0300685	-0.0300366	-0.0299983	-0.0297073	-0.0294206	-0.0294004	-0.029353	-0.0291828	-0.0290939	-0.0289925	-0.028968	-0.0288433	-0.0288159	-0.0287696	-0.0286009	-0.0283789	-0.0282681	-0.0280615
-0.0366267	-0.0365462	-0.0364844	-0.0364791	-0.0358294	-0.0353892	-0.0348771	-0.0347599	-0.0346761	-0.0346197	-0.0343581	-0.0338984	-0.0337711	-0.0329116	-0.0328381	-0.0327839	-0.0327341	-0.0324274	-0.0321587	-0.0319832	-0.0319619	-0.031945	-0.031759	-0.0313507	-0.0313486	-0.0312842	-0.0312492	-0.0311064	-0.0305208	-0.0304845	-0.030434	-0.0302856	-0.0300686	-0.0300367	-0.0299984	-0.0297074	-0.0294207	-0.0294005	-0.0293531	-0.0291829	-0.029094	-0.0289926	-0.0289681	-0.0288435	-0.028816	-0.0287698	-0.028601	-0.028379	-0.0282683	-0.0280616
-0.0366415	-0.036561	-0.0364992	-0.0364939	-0.0358439	-0.0354035	-0.0348912	-0.034774	-0.0346902	-0.0346337	-0.034372	-0.0339121	-0.0337847	-0.0329249	-0.0328514	-0.0327971	-0.0327473	-0.0324406	-0.0321717	-0.0319962	-0.0319748	-0.0319579	-0.0317719	-0.0313634	-0.0313613	-0.0312968	-0.0312619	-0.031119	-0.0305332	-0.0304968	-0.0304463	-0.0302978	-0.0300808	-0.0300488	-0.0300106	-0.0297194	-0.0294326	-0.0294124	-0.029365	-0.0291947	-0.0291057	-0.0290043	-0.0289798	-0.0288551	-0.0288276	-0.0287814	-0.0286126	-0.0283905	-0.0282797	-0.0280729
-0.0366808	-0.0366003	-0.0365384	-0.0365331	-0.0358824	-0.0354415	-0.0349287	-0.0348113	-0.0347274	-0.0346709	-0.0344089	-0.0339485	-0.033821	-0.0329603	-0.0328867	-0.0328324	-0.0327825	-0.0324754	-0.0322062	-0.0320305	-0.0320092	-0.0319922	-0.031806	-0.0313971	-0.031395	-0.0313304	-0.0312954	-0.0311524	-0.030566	-0.0305296	-0.030479	-0.0303304	-0.0301131	-0.0300811	-0.0300428	-0.0297513	-0.0294642	-0.029444	-0.0293965	-0.029226	-0.029137	-0.0290355	-0.029011	-0.0288861	-0.0288586	-0.0288123	-0.0286434	-0.028421	-0.0283101	-0.0281031
-0.0367182	-0.0366375	-0.0365755	-0.0365702	-0.0359189	-0.0354776	-0.0349642	-0.0348467	-0.0347628	-0.0347062	-0.0344439	-0.0339831	-0.0338554	-0.0329938	-0.0329201	-0.0328658	-0.0328158	-0.0325084	-0.032239	-0.0320631	-0.0320417	-0.0320248	-0.0318383	-0.031429	-0.0314269	-0.0313623	-0.0313273	-0.0311841	-0.0305971	-0.0305607	-0.03051	-0.0303612	-0.0301437	-0.0301117	-0.0300734	-0.0297816	-0.0294942	-0.0294739	-0.0294264	-0.0292558	-0.0291667	-0.029065	-0.0290405	-0.0289155	-0.028888	-0.0288416	-0.0286725	-0.0284499	-0.0283389	-0.0281317
-0.0367217	-0.036641	-0.0365791	-0.0365738	-0.0359224	-0.035481	-0.0349676	-0.0348501	-0.0347661	-0.0347095	-0.0344472	-0.0339864	-0.0338587	-0.032997	-0.0329233	-0.032869	-0.032819	-0.0325116	-0.0322421	-0.0320662	-0.0320448	-0.0320279	-0.0318414	-0.031432	-0.03143	-0.0313654	-0.0313303	-0.0311871	-0.0306	-0.0305636	-0.0305129	-0.0303641	-0.0301466	-0.0301146	-0.0300763	-0.0297845	-0.029497	-0.0294768	-0.0294293	-0.0292586	-0.0291695	-0.0290678	-0.0290433	-0.0289183	-0.0288907	-0.0288444	-0.0286753	-0.0284527	-0.0283416	-0.0281344
-0.0367786	-0.0366978	-0.0366357	-0.0366304	-0.035978	-0.0355359	-0.0350218	-0.0349041	-0.03482	-0.0347633	-0.0345006	-0.034039	-0.0339111	-0.0330481	-0.0329743	-0.0329199	-0.0328698	-0.0325619	-0.032292	-0.0321159	-0.0320945	-0.0320775	-0.0318907	-0.0314807	-0.0314786	-0.0314139	-0.0313788	-0.0312354	-0.0306474	-0.0306109	-0.0305602	-0.0304112	-0.0301933	-0.0301612	-0.0301229	-0.0298306	-0.0295427	-0.0295224	-0.0294749	-0.0293039	-0.0292146	-0.0291129	-0.0290883	-0.0289631	-0.0289355	-0.0288891	-0.0287197	-0.0284967	-0.0283855	-0.028178
-0.0368078	-0.0367269	-0.0366648	-0.0366595	-0.0360066	-0.0355641	-0.0350496	-0.0349318	-0.0348476	-0.0347909	-0.034528	-0.034066	-0.033938	-0.0330743	-0.0330005	-0.032946	-0.0328959	-0.0325878	-0.0323177	-0.0321414	-0.0321199	-0.0321029	-0.031916	-0.0315057	-0.0315036	-0.0314389	-0.0314037	-0.0312602	-0.0306717	-0.0306352	-0.0305844	-0.0304353	-0.0302173	-0.0301852	-0.0301468	-0.0298543	-0.0295661	-0.0295459	-0.0294982	-0.0293272	-0.0292378	-0.029136	-0.0291113	-0.0289861	-0.0289584	-0.028912	-0.0287425	-0.0285193	-0.028408	-0.0282003
-0.0368149	-0.036734	-0.0366719	-0.0366666	-0.0360135	-0.035571	-0.0350564	-0.0349386	-0.0348543	-0.0347976	-0.0345347	-0.0340726	-0.0339446	-0.0330807	-0.0330069	-0.0329524	-0.0329023	-0.0325941	-0.0323239	-0.0321476	-0.0321262	-0.0321092	-0.0319222	-0.0315118	-0.0315097	-0.031445	-0.0314098	-0.0312662	-0.0306777	-0.0306412	-0.0305904	-0.0304412	-0.0302231	-0.030191	-0.0301526	-0.02986	-0.0295719	-0.0295516	-0.029504	-0.0293328	-0.0292435	-0.0291416	-0.029117	-0.0289917	-0.0289641	-0.0289176	-0.028748	-0.0285249	-0.0284135	-0.0282058
-0.0368208	-0.0367399	-0.0366778	-0.0366725	-0.0360193	-0.0355767	-0.035062	-0.0349442	-0.0348599	-0.0348032	-0.0345402	-0.0340781	-0.0339501	-0.033086	-0.0330122	-0.0329576	-0.0329076	-0.0325993	-0.0323291	-0.0321527	-0.0321313	-0.0321143	-0.0319273	-0.0315169	-0.0315148	-0.03145	-0.0314148	-0.0312713	-0.0306826	-0.0306461	-0.0305953	-0.0304461	-0.030228	-0.0301959	-0.0301574	-0.0298648	-0.0295766	-0.0295563	-0.0295087	-0.0293375	-0.0292482	-0.0291463	-0.0291217	-0.0289963	-0.0289687	-0.0289222	-0.0287526	-0.0285294	-0.0284181	-0.0282103
-0.036837	-0.0367561	-0.0366939	-0.0366886	-0.0360352	-0.0355924	-0.0350774	-0.0349595	-0.0348753	-0.0348185	-0.0345554	-0.034093	-0.033965	-0.0331006	-0.0330267	-0.0329721	-0.032922	-0.0326136	-0.0323433	-0.0321669	-0.0321454	-0.0321284	-0.0319414	-0.0315307	-0.0315286	-0.0314638	-0.0314286	-0.031285	-0.0306961	-0.0306595	-0.0306087	-0.0304595	-0.0302412	-0.0302091	-0.0301707	-0.029878	-0.0295896	-0.0295693	-0.0295217	-0.0293504	-0.029261	-0.0291591	-0.0291345	-0.0290091	-0.0289814	-0.028935	-0.0287653	-0.028542	-0.0284306	-0.0282227
-0.0368375	-0.0367566	-0.0366944	-0.0366891	-0.0360357	-0.0355929	-0.0350779	-0.03496	-0.0348758	-0.034819	-0.0345559	-0.0340936	-0.0339655	-0.0331011	-0.0330272	-0.0329726	-0.0329225	-0.0326141	-0.0323438	-0.0321674	-0.0321459	-0.0321289	-0.0319419	-0.0315312	-0.0315291	-0.0314643	-0.0314291	-0.0312855	-0.0306966	-0.03066	-0.0306092	-0.0304599	-0.0302417	-0.0302096	-0.0301712	-0.0298784	-0.0295901	-0.0295698	-0.0295221	-0.0293509	-0.0292615	-0.0291595	-0.0291349	-0.0290095	-0.0289819	-0.0289354	-0.0287657	-0.0285424	-0.028431	-0.0282231
-0.0368419	-0.036761	-0.0366988	-0.0366935	-0.03604	-0.0355971	-0.0350821	-0.0349642	-0.03488	-0.0348232	-0.03456	-0.0340976	-0.0339696	-0.033105	-0.0330311	-0.0329766	-0.0329265	-0.032618	-0.0323477	-0.0321712	-0.0321498	-0.0321327	-0.0319457	-0.031535	-0.0315329	-0.0314681	-0.0314329	-0.0312892	-0.0307002	-0.0306637	-0.0306128	-0.0304636	-0.0302453	-0.0302132	-0.0301748	-0.029882	-0.0295936	-0.0295733	-0.0295256	-0.0293544	-0.029265	-0.029163	-0.0291384	-0.029013	-0.0289853	-0.0289388	-0.0287692	-0.0285458	-0.0284344	-0.0282265
-0.0368466	-0.0367657	-0.0367035	-0.0366982	-0.0360446	-0.0356017	-0.0350866	-0.0349687	-0.0348844	-0.0348276	-0.0345644	-0.034102	-0.0339739	-0.0331093	-0.0330353	-0.0329808	-0.0329306	-0.0326222	-0.0323518	-0.0321753	-0.0321539	-0.0321368	-0.0319497	-0.031539	-0.0315369	-0.0314721	-0.0314369	-0.0312932	-0.0307041	-0.0306676	-0.0306167	-0.0304674	-0.0302492	-0.0302171	-0.0301786	-0.0298858	-0.0295974	-0.0295771	-0.0295294	-0.0293581	-0.0292687	-0.0291667	-0.0291421	-0.0290167	-0.028989	-0.0289425	-0.0287728	-0.0285495	-0.028438	-0.0282301
-0.0368833	-0.0368023	-0.03674	-0.0367347	-0.0360805	-0.0356371	-0.0351215	-0.0350035	-0.0349191	-0.0348623	-0.0345988	-0.0341359	-0.0340077	-0.0331422	-0.0330682	-0.0330136	-0.0329634	-0.0326547	-0.032384	-0.0322073	-0.0321859	-0.0321688	-0.0319815	-0.0315704	-0.0315683	-0.0315034	-0.0314682	-0.0313243	-0.0307347	-0.0306981	-0.0306472	-0.0304978	-0.0302793	-0.0302471	-0.0302086	-0.0299155	-0.0296268	-0.0296065	-0.0295588	-0.0293874	-0.0292978	-0.0291958	-0.0291711	-0.0290456	-0.0290179	-0.0289713	-0.0288015	-0.0285779	-0.0284663	-0.0282582
-0.0369374	-0.0368563	-0.0367939	-0.0367886	-0.0361334	-0.0356894	-0.035173	-0.0350548	-0.0349703	-0.0349134	-0.0346496	-0.034186	-0.0340576	-0.0331908	-0.0331167	-0.033062	-0.0330118	-0.0327026	-0.0324315	-0.0322546	-0.0322331	-0.032216	-0.0320285	-0.0316167	-0.0316146	-0.0315496	-0.0315143	-0.0313703	-0.0307798	-0.0307431	-0.0306922	-0.0305425	-0.0303237	-0.0302915	-0.030253	-0.0299594	-0.0296703	-0.0296499	-0.0296022	-0.0294305	-0.0293408	-0.0292386	-0.0292139	-0.0290882	-0.0290605	-0.0290138	-0.0288437	-0.0286198	-0.0285081	-0.0282997
-0.0369384	-0.0368572	-0.0367949	-0.0367896	-0.0361344	-0.0356903	-0.0351739	-0.0350557	-0.0349713	-0.0349143	-0.0346505	-0.0341869	-0.0340585	-0.0331917	-0.0331176	-0.0330629	-0.0330127	-0.0327034	-0.0324323	-0.0322554	-0.0322339	-0.0322169	-0.0320293	-0.0316175	-0.0316154	-0.0315504	-0.0315152	-0.0313711	-0.0307806	-0.0307439	-0.030693	-0.0305433	-0.0303245	-0.0302923	-0.0302538	-0.0299602	-0.0296711	-0.0296507	-0.0296029	-0.0294312	-0.0293416	-0.0292394	-0.0292147	-0.0290889	-0.0290612	-0.0290146	-0.0288445	-0.0286206	-0.0285088	-0.0283004
-0.0369601	-0.0368789	-0.0368165	-0.0368112	-0.0361556	-0.0357113	-0.0351946	-0.0350763	-0.0349918	-0.0349348	-0.0346709	-0.034207	-0.0340785	-0.0332112	-0.0331371	-0.0330823	-0.033032	-0.0327226	-0.0324514	-0.0322744	-0.0322529	-0.0322358	-0.0320481	-0.0316361	-0.031634	-0.031569	-0.0315337	-0.0313896	-0.0307987	-0.030762	-0.030711	-0.0305613	-0.0303423	-0.0303101	-0.0302715	-0.0299778	-0.0296885	-0.0296681	-0.0296203	-0.0294485	-0.0293588	-0.0292565	-0.0292318	-0.029106	-0.0290783	-0.0290317	-0.0288614	-0.0286374	-0.0285256	-0.028317
-0.036999	-0.0369178	-0.0368553	-0.03685	-0.0361937	-0.035749	-0.0352317	-0.0351133	-0.0350287	-0.0349717	-0.0347074	-0.034243	-0.0341144	-0.0332462	-0.033172	-0.0331172	-0.0330669	-0.0327571	-0.0324856	-0.0323084	-0.0322869	-0.0322698	-0.0320819	-0.0316694	-0.0316674	-0.0316022	-0.0315669	-0.0314226	-0.0308311	-0.0307944	-0.0307434	-0.0305935	-0.0303743	-0.0303421	-0.0303034	-0.0300094	-0.0297198	-0.0296994	-0.0296515	-0.0294796	-0.0293898	-0.0292874	-0.0292626	-0.0291367	-0.0291089	-0.0290623	-0.0288918	-0.0286676	-0.0285557	-0.0283469
-0.0369991	-0.0369178	-0.0368553	-0.03685	-0.0361937	-0.035749	-0.0352317	-0.0351133	-0.0350287	-0.0349717	-0.0347074	-0.0342431	-0.0341144	-0.0332462	-0.033172	-0.0331172	-0.0330669	-0.0327571	-0.0324856	-0.0323084	-0.0322869	-0.0322698	-0.0320819	-0.0316695	-0.0316674	-0.0316023	-0.0315669	-0.0314227	-0.0308312	-0.0307945	-0.0307434	-0.0305935	-0.0303743	-0.0303421	-0.0303035	-0.0300094	-0.0297198	-0.0296994	-0.0296516	-0.0294796	-0.0293898	-0.0292874	-0.0292627	-0.0291367	-0.029109	-0.0290623	-0.0288919	-0.0286676	-0.0285557	-0.0283469
-0.0370481	-0.0369667	-0.0369042	-0.0368988	-0.0362416	-0.0357963	-0.0352784	-0.0351598	-0.0350751	-0.035018	-0.0347534	-0.0342884	-0.0341596	-0.0332903	-0.0332159	-0.0331611	-0.0331107	-0.0328005	-0.0325286	-0.0323512	-0.0323296	-0.0323125	-0.0321244	-0.0317114	-0.0317093	-0.0316441	-0.0316087	-0.0314643	-0.030872	-0.0308352	-0.0307841	-0.030634	-0.0304145	-0.0303823	-0.0303436	-0.0300492	-0.0297592	-0.0297388	-0.0296908	-0.0295186	-0.0294287	-0.0293262	-0.0293014	-0.0291753	-0.0291475	-0.0291008	-0.0289301	-0.0287055	-0.0285935	-0.0283844
-0.0370694	-0.0369879	-0.0369254	-0.03692	-0.0362625	-0.0358169	-0.0352987	-0.0351801	-0.0350953	-0.0350381	-0.0347734	-0.0343081	-0.0341793	-0.0333094	-0.033235	-0.0331802	-0.0331297	-0.0328194	-0.0325474	-0.0323698	-0.0323482	-0.0323311	-0.0321429	-0.0317296	-0.0317275	-0.0316623	-0.0316269	-0.0314824	-0.0308898	-0.030853	-0.0308018	-0.0306516	-0.030432	-0.0303997	-0.030361	-0.0300664	-0.0297763	-0.0297559	-0.0297079	-0.0295356	-0.0294456	-0.029343	-0.0293183	-0.0291921	-0.0291643	-0.0291175	-0.0289468	-0.028722	-0.0286099	-0.0284008
-0.0370969	-0.0370154	-0.0369528	-0.0369475	-0.0362894	-0.0358435	-0.0353249	-0.0352062	-0.0351214	-0.0350642	-0.0347992	-0.0343336	-0.0342047	-0.0333342	-0.0332597	-0.0332048	-0.0331543	-0.0328438	-0.0325715	-0.0323939	-0.0323723	-0.0323551	-0.0321668	-0.0317532	-0.0317511	-0.0316858	-0.0316504	-0.0315058	-0.0309127	-0.0308759	-0.0308247	-0.0306744	-0.0304546	-0.0304223	-0.0303836	-0.0300888	-0.0297984	-0.029778	-0.02973	-0.0295575	-0.0294675	-0.0293648	-0.02934	-0.0292138	-0.0291859	-0.0291391	-0.0289683	-0.0287434	-0.0286312	-0.0284219
-0.0371476	-0.037066	-0.0370033	-0.036998	-0.036339	-0.0358925	-0.0353732	-0.0352543	-0.0351694	-0.0351121	-0.0348468	-0.0343805	-0.0342514	-0.0333797	-0.0333052	-0.0332502	-0.0331996	-0.0328887	-0.0326161	-0.0324381	-0.0324165	-0.0323993	-0.0322107	-0.0317966	-0.0317945	-0.0317291	-0.0316937	-0.0315488	-0.0309549	-0.0309181	-0.0308668	-0.0307163	-0.0304963	-0.0304639	-0.0304251	-0.0301299	-0.0298391	-0.0298187	-0.0297706	-0.0295979	-0.0295078	-0.029405	-0.0293801	-0.0292537	-0.0292258	-0.029179	-0.0290079	-0.0287827	-0.0286703	-0.0284607
-0.0371595	-0.0370778	-0.0370151	-0.0370098	-0.0363506	-0.0359039	-0.0353845	-0.0352656	-0.0351806	-0.0351233	-0.0348579	-0.0343915	-0.0342623	-0.0333904	-0.0333158	-0.0332608	-0.0332102	-0.0328991	-0.0326265	-0.0324485	-0.0324268	-0.0324097	-0.032221	-0.0318067	-0.0318047	-0.0317393	-0.0317038	-0.0315589	-0.0309648	-0.030928	-0.0308767	-0.0307261	-0.030506	-0.0304736	-0.0304348	-0.0301395	-0.0298487	-0.0298282	-0.0297801	-0.0296074	-0.0295172	-0.0294144	-0.0293895	-0.029263	-0.0292352	-0.0291883	-0.0290171	-0.0287918	-0.0286795	-0.0284698
-0.0372019	-0.0371201	-0.0370574	-0.037052	-0.0363921	-0.0359449	-0.0354248	-0.0353058	-0.0352207	-0.0351634	-0.0348977	-0.0344308	-0.0343014	-0.0334285	-0.0333538	-0.0332987	-0.0332481	-0.0329367	-0.0326637	-0.0324855	-0.0324639	-0.0324467	-0.0322578	-0.031843	-0.0318409	-0.0317755	-0.03174	-0.0315949	-0.0310002	-0.0309633	-0.0309119	-0.0307612	-0.0305408	-0.0305084	-0.0304696	-0.0301739	-0.0298827	-0.0298622	-0.0298141	-0.0296412	-0.0295509	-0.0294479	-0.029423	-0.0292964	-0.0292685	-0.0292216	-0.0290502	-0.0288247	-0.0287122	-0.0285023
-0.0372138	-0.037132	-0.0370692	-0.0370639	-0.0364038	-0.0359564	-0.0354362	-0.0353171	-0.035232	-0.0351746	-0.0349088	-0.0344418	-0.0343124	-0.0334392	-0.0333645	-0.0333094	-0.0332588	-0.0329472	-0.0326741	-0.0324959	-0.0324743	-0.0324571	-0.0322681	-0.0318532	-0.0318511	-0.0317857	-0.0317501	-0.031605	-0.0310101	-0.0309732	-0.0309218	-0.030771	-0.0305506	-0.0305182	-0.0304793	-0.0301836	-0.0298923	-0.0298718	-0.0298236	-0.0296507	-0.0295604	-0.0294574	-0.0294325	-0.0293058	-0.0292779	-0.0292309	-0.0290595	-0.0288339	-0.0287214	-0.0285114
-0.0372602	-0.0371783	-0.0371154	-0.03711	-0.0364491	-0.0360012	-0.0354803	-0.0353611	-0.0352759	-0.0352185	-0.0349523	-0.0344847	-0.0343552	-0.0334808	-0.0334061	-0.0333509	-0.0333002	-0.0329883	-0.0327149	-0.0325364	-0.0325147	-0.0324975	-0.0323083	-0.0318929	-0.0318908	-0.0318253	-0.0317897	-0.0316444	-0.0310487	-0.0310118	-0.0309603	-0.0308094	-0.0305887	-0.0305562	-0.0305173	-0.0302212	-0.0299295	-0.029909	-0.0298608	-0.0296876	-0.0295972	-0.0294941	-0.0294691	-0.0293423	-0.0293144	-0.0292674	-0.0290957	-0.0288699	-0.0287572	-0.0285469
-0.0373026	-0.0372207	-0.0371577	-0.0371523	-0.0364906	-0.0360423	-0.0355208	-0.0354014	-0.0353161	-0.0352586	-0.0349922	-0.034524	-0.0343943	-0.033519	-0.0334441	-0.0333889	-0.0333382	-0.0330259	-0.0327521	-0.0325735	-0.0325518	-0.0325345	-0.0323451	-0.0319293	-0.0319272	-0.0318615	-0.0318259	-0.0316804	-0.0310841	-0.0310471	-0.0309956	-0.0308445	-0.0306235	-0.030591	-0.0305521	-0.0302556	-0.0299636	-0.0299431	-0.0298948	-0.0297214	-0.0296309	-0.0295277	-0.0295027	-0.0293758	-0.0293478	-0.0293007	-0.0291289	-0.0289028	-0.0287899	-0.0285794
-0.0373385	-0.0372565	-0.0371935	-0.0371881	-0.0365258	-0.036077	-0.035555	-0.0354355	-0.0353501	-0.0352926	-0.0350259	-0.0345572	-0.0344274	-0.0335513	-0.0334764	-0.0334211	-0.0333703	-0.0330577	-0.0327837	-0.0326049	-0.0325831	-0.0325659	-0.0323763	-0.03196	-0.0319579	-0.0318922	-0.0318566	-0.031711	-0.031114	-0.031077	-0.0310255	-0.0308742	-0.030653	-0.0306205	-0.0305815	-0.0302848	-0.0299925	-0.0299719	-0.0299236	-0.0297501	-0.0296595	-0.0295561	-0.0295311	-0.0294041	-0.029376	-0.0293289	-0.0291569	-0.0289306	-0.0288177	-0.028607
-0.0373609	-0.0372788	-0.0372158	-0.0372104	-0.0365476	-0.0360986	-0.0355762	-0.0354567	-0.0353713	-0.0353137	-0.0350468	-0.0345779	-0.034448	-0.0335713	-0.0334964	-0.0334411	-0.0333902	-0.0330775	-0.0328033	-0.0326244	-0.0326026	-0.0325853	-0.0323956	-0.0319791	-0.031977	-0.0319113	-0.0318756	-0.0317299	-0.0311327	-0.0310956	-0.031044	-0.0308927	-0.0306713	-0.0306388	-0.0305998	-0.0303029	-0.0300104	-0.0299898	-0.0299415	-0.0297679	-0.0296772	-0.0295738	-0.0295488	-0.0294216	-0.0293936	-0.0293465	-0.0291744	-0.0289479	-0.0288349	-0.0286241
-0.0373699	-0.0372878	-0.0372248	-0.0372194	-0.0365565	-0.0361073	-0.0355849	-0.0354653	-0.0353798	-0.0353222	-0.0350553	-0.0345863	-0.0344564	-0.0335795	-0.0335045	-0.0334492	-0.0333983	-0.0330855	-0.0328112	-0.0326323	-0.0326105	-0.0325932	-0.0324035	-0.0319869	-0.0319848	-0.031919	-0.0318834	-0.0317376	-0.0311402	-0.0311031	-0.0310516	-0.0309001	-0.0306788	-0.0306462	-0.0306072	-0.0303102	-0.0300177	-0.0299971	-0.0299488	-0.0297751	-0.0296844	-0.029581	-0.029556	-0.0294288	-0.0294007	-0.0293536	-0.0291815	-0.0289549	-0.0288419	-0.028631
-0.0373713	-0.0372892	-0.0372261	-0.0372207	-0.0365578	-0.0361086	-0.0355862	-0.0354666	-0.0353811	-0.0353235	-0.0350566	-0.0345876	-0.0344576	-0.0335807	-0.0335057	-0.0334504	-0.0333996	-0.0330867	-0.0328124	-0.0326335	-0.0326117	-0.0325944	-0.0324047	-0.0319881	-0.031986	-0.0319202	-0.0318845	-0.0317388	-0.0311413	-0.0311043	-0.0310527	-0.0309013	-0.0306799	-0.0306473	-0.0306083	-0.0303113	-0.0300188	-0.0299982	-0.0299499	-0.0297762	-0.0296855	-0.029582	-0.029557	-0.0294298	-0.0294018	-0.0293546	-0.0291825	-0.028956	-0.028843	-0.0286321
-0.0373877	-0.0373056	-0.0372425	-0.0372371	-0.0365739	-0.0361245	-0.0356018	-0.0354822	-0.0353967	-0.0353391	-0.035072	-0.0346028	-0.0344728	-0.0335955	-0.0335205	-0.0334651	-0.0334143	-0.0331013	-0.0328269	-0.0326478	-0.0326261	-0.0326088	-0.0324189	-0.0320021	-0.032	-0.0319342	-0.0318986	-0.0317528	-0.031155	-0.031118	-0.0310664	-0.0309149	-0.0306934	-0.0306608	-0.0306218	-0.0303247	-0.030032	-0.0300114	-0.0299631	-0.0297893	-0.0296985	-0.0295951	-0.0295701	-0.0294428	-0.0294148	-0.0293676	-0.0291954	-0.0289687	-0.0288557	-0.0286447
-0.0373956	-0.0373134	-0.0372503	-0.0372449	-0.0365816	-0.0361321	-0.0356093	-0.0354896	-0.0354041	-0.0353465	-0.0350794	-0.03461	-0.03448	-0.0336025	-0.0335275	-0.0334721	-0.0334212	-0.0331082	-0.0328338	-0.0326547	-0.0326329	-0.0326156	-0.0324257	-0.0320088	-0.0320067	-0.0319409	-0.0319052	-0.0317594	-0.0311616	-0.0311245	-0.0310729	-0.0309213	-0.0306998	-0.0306672	-0.0306282	-0.030331	-0.0300383	-0.0300177	-0.0299693	-0.0297955	-0.0297047	-0.0296012	-0.0295762	-0.029449	-0.0294209	-0.0293737	-0.0292015	-0.0289748	-0.0288617	-0.0286507
-0.0374163	-0.0373341	-0.037271	-0.0372656	-0.0366019	-0.0361521	-0.0356291	-0.0355093	-0.0354237	-0.0353661	-0.0350988	-0.0346292	-0.0344992	-0.0336212	-0.0335461	-0.0334907	-0.0334398	-0.0331266	-0.032852	-0.0326728	-0.032651	-0.0326337	-0.0324437	-0.0320266	-0.0320245	-0.0319587	-0.0319229	-0.031777	-0.0311789	-0.0311417	-0.0310901	-0.0309385	-0.0307169	-0.0306843	-0.0306452	-0.0303478	-0.030055	-0.0300344	-0.029986	-0.029812	-0.0297212	-0.0296177	-0.0295927	-0.0294653	-0.0294372	-0.02939	-0.0292177	-0.0289909	-0.0288777	-0.0286666
-0.0374227	-0.0373404	-0.0372773	-0.0372719	-0.0366081	-0.0361582	-0.0356351	-0.0355153	-0.0354297	-0.0353721	-0.0351048	-0.0346351	-0.034505	-0.0336269	-0.0335518	-0.0334964	-0.0334455	-0.0331322	-0.0328575	-0.0326783	-0.0326565	-0.0326392	-0.0324492	-0.032032	-0.0320299	-0.0319641	-0.0319283	-0.0317824	-0.0311841	-0.031147	-0.0310954	-0.0309437	-0.0307221	-0.0306894	-0.0306504	-0.030353	-0.0300601	-0.0300394	-0.029991	-0.0298171	-0.0297263	-0.0296227	-0.0295977	-0.0294703	-0.0294422	-0.029395	-0.0292226	-0.0289958	-0.0288826	-0.0286714
-0.037435	-0.0373528	-0.0372896	-0.0372842	-0.0366202	-0.0361702	-0.0356468	-0.0355271	-0.0354414	-0.0353837	-0.0351164	-0.0346465	-0.0345164	-0.033638	-0.0335628	-0.0335074	-0.0334565	-0.0331431	-0.0328684	-0.0326891	-0.0326673	-0.03265	-0.0324599	-0.0320426	-0.0320405	-0.0319746	-0.0319389	-0.0317929	-0.0311944	-0.0311573	-0.0311056	-0.030954	-0.0307322	-0.0306996	-0.0306605	-0.030363	-0.03007	-0.0300494	-0.0300009	-0.0298269	-0.0297361	-0.0296325	-0.0296074	-0.02948	-0.0294519	-0.0294047	-0.0292323	-0.0290053	-0.0288921	-0.0286809
-0.0374569	-0.0373746	-0.0373114	-0.037306	-0.0366416	-0.0361914	-0.0356677	-0.0355479	-0.0354622	-0.0354045	-0.0351369	-0.0346668	-0.0345366	-0.0336577	-0.0335825	-0.033527	-0.0334761	-0.0331625	-0.0328876	-0.0327082	-0.0326864	-0.0326691	-0.0324789	-0.0320614	-0.0320593	-0.0319933	-0.0319576	-0.0318115	-0.0312127	-0.0311755	-0.0311238	-0.0309721	-0.0307502	-0.0307176	-0.0306785	-0.0303808	-0.0300876	-0.0300669	-0.0300185	-0.0298444	-0.0297535	-0.0296498	-0.0296248	-0.0294973	-0.0294692	-0.0294219	-0.0292494	-0.0290223	-0.028909	-0.0286977
-0.0375333	-0.0374508	-0.0373875	-0.0373821	-0.0367163	-0.0362651	-0.0357404	-0.0356203	-0.0355345	-0.0354766	-0.0352085	-0.0347375	-0.034607	-0.0337262	-0.0336509	-0.0335954	-0.0335443	-0.0332301	-0.0329547	-0.0327749	-0.032753	-0.0327357	-0.0325451	-0.0321267	-0.0321246	-0.0320585	-0.0320227	-0.0318763	-0.0312763	-0.0312391	-0.0311873	-0.0310352	-0.0308129	-0.0307802	-0.030741	-0.0304427	-0.0301489	-0.0301282	-0.0300797	-0.0299052	-0.0298141	-0.0297102	-0.0296852	-0.0295574	-0.0295292	-0.0294819	-0.029309	-0.0290815	-0.028968	-0.0287562
-0.0375604	-0.0374779	-0.0374145	-0.0374091	-0.0367428	-0.0362913	-0.0357662	-0.035646	-0.0355601	-0.0355022	-0.035234	-0.0347626	-0.034632	-0.0337506	-0.0336752	-0.0336196	-0.0335685	-0.0332541	-0.0329785	-0.0327986	-0.0327767	-0.0327593	-0.0325686	-0.0321499	-0.0321478	-0.0320817	-0.0320458	-0.0318994	-0.0312989	-0.0312616	-0.0312098	-0.0310576	-0.0308351	-0.0308024	-0.0307632	-0.0304647	-0.0301707	-0.03015	-0.0301014	-0.0299268	-0.0298357	-0.0297317	-0.0297066	-0.0295787	-0.0295506	-0.0295032	-0.0293302	-0.0291025	-0.0289889	-0.0287769
-0.0375732	-0.0374907	-0.0374273	-0.0374218	-0.0367553	-0.0363037	-0.0357784	-0.0356582	-0.0355723	-0.0355144	-0.035246	-0.0347744	-0.0346438	-0.0337621	-0.0336867	-0.0336311	-0.03358	-0.0332654	-0.0329897	-0.0328098	-0.0327879	-0.0327705	-0.0325797	-0.0321609	-0.0321588	-0.0320926	-0.0320568	-0.0319103	-0.0313096	-0.0312723	-0.0312205	-0.0310682	-0.0308456	-0.0308129	-0.0307737	-0.0304751	-0.030181	-0.0301603	-0.0301117	-0.029937	-0.0298458	-0.0297419	-0.0297167	-0.0295888	-0.0295607	-0.0295132	-0.0293402	-0.0291124	-0.0289988	-0.0287868
-0.0375789	-0.0374963	-0.0374329	-0.0374275	-0.0367609	-0.0363092	-0.0357838	-0.0356636	-0.0355776	-0.0355197	-0.0352513	-0.0347797	-0.034649	-0.0337672	-0.0336918	-0.0336362	-0.0335851	-0.0332705	-0.0329947	-0.0328147	-0.0327928	-0.0327755	-0.0325847	-0.0321657	-0.0321636	-0.0320975	-0.0320616	-0.0319151	-0.0313143	-0.031277	-0.0312252	-0.0310729	-0.0308503	-0.0308176	-0.0307783	-0.0304797	-0.0301855	-0.0301648	-0.0301162	-0.0299416	-0.0298504	-0.0297463	-0.0297212	-0.0295933	-0.0295651	-0.0295177	-0.0293446	-0.0291168	-0.0290032	-0.0287911
-0.0375852	-0.0375027	-0.0374392	-0.0374338	-0.0367671	-0.0363153	-0.0357899	-0.0356696	-0.0355837	-0.0355257	-0.0352573	-0.0347855	-0.0346549	-0.0337729	-0.0336975	-0.0336419	-0.0335907	-0.0332761	-0.0330003	-0.0328203	-0.0327984	-0.032781	-0.0325902	-0.0321712	-0.0321691	-0.0321029	-0.032067	-0.0319205	-0.0313196	-0.0312823	-0.0312305	-0.0310782	-0.0308555	-0.0308228	-0.0307835	-0.0304848	-0.0301906	-0.0301699	-0.0301213	-0.0299466	-0.0298554	-0.0297514	-0.0297262	-0.0295983	-0.0295701	-0.0295227	-0.0293496	-0.0291217	-0.0290081	-0.028796
-0.0375854	-0.0375028	-0.0374394	-0.037434	-0.0367673	-0.0363155	-0.0357901	-0.0356698	-0.0355838	-0.0355259	-0.0352575	-0.0347857	-0.0346551	-0.0337731	-0.0336977	-0.033642	-0.0335909	-0.0332763	-0.0330004	-0.0328204	-0.0327985	-0.0327812	-0.0325903	-0.0321713	-0.0321692	-0.0321031	-0.0320672	-0.0319206	-0.0313198	-0.0312825	-0.0312306	-0.0310783	-0.0308557	-0.0308229	-0.0307837	-0.030485	-0.0301908	-0.0301701	-0.0301215	-0.0299468	-0.0298555	-0.0297515	-0.0297264	-0.0295985	-0.0295703	-0.0295228	-0.0293497	-0.0291219	-0.0290082	-0.0287961
-0.0375982	-0.0375156	-0.0374522	-0.0374468	-0.0367798	-0.0363279	-0.0358023	-0.035682	-0.035596	-0.035538	-0.0352695	-0.0347976	-0.0346669	-0.0337846	-0.0337092	-0.0336535	-0.0336024	-0.0332876	-0.0330117	-0.0328316	-0.0328097	-0.0327924	-0.0326014	-0.0321823	-0.0321802	-0.032114	-0.0320781	-0.0319315	-0.0313304	-0.0312931	-0.0312413	-0.0310889	-0.0308662	-0.0308334	-0.0307942	-0.0304954	-0.0302011	-0.0301804	-0.0301317	-0.029957	-0.0298657	-0.0297617	-0.0297365	-0.0296086	-0.0295803	-0.0295329	-0.0293597	-0.0291318	-0.0290181	-0.0288059
-0.0377145	-0.0376316	-0.037568	-0.0375625	-0.0368935	-0.0364402	-0.035913	-0.0357923	-0.035706	-0.0356479	-0.0353785	-0.0349052	-0.0347741	-0.0338891	-0.0338134	-0.0337576	-0.0337063	-0.0333905	-0.0331138	-0.0329331	-0.0329112	-0.0328938	-0.0327023	-0.0322818	-0.0322797	-0.0322133	-0.0321773	-0.0320302	-0.0314273	-0.0313899	-0.0313379	-0.031185	-0.0309616	-0.0309288	-0.0308894	-0.0305897	-0.0302945	-0.0302737	-0.0302249	-0.0300496	-0.0299581	-0.0298537	-0.0298285	-0.0297001	-0.0296718	-0.0296242	-0.0294505	-0.0292219	-0.0291078	-0.028895
-0.0377337	-0.0376508	-0.0375871	-0.0375817	-0.0369123	-0.0364588	-0.0359313	-0.0358105	-0.0357242	-0.0356661	-0.0353965	-0.034923	-0.0347918	-0.0339063	-0.0338306	-0.0337748	-0.0337234	-0.0334075	-0.0331306	-0.0329499	-0.0329279	-0.0329105	-0.0327189	-0.0322983	-0.0322961	-0.0322297	-0.0321937	-0.0320466	-0.0314433	-0.0314059	-0.0313538	-0.0312009	-0.0309774	-0.0309445	-0.0309051	-0.0306053	-0.0303099	-0.0302891	-0.0302403	-0.0300649	-0.0299733	-0.0298689	-0.0298437	-0.0297152	-0.0296869	-0.0296393	-0.0294655	-0.0292368	-0.0291226	-0.0289097
-0.037741	-0.0376581	-0.0375944	-0.037589	-0.0369195	-0.0364659	-0.0359382	-0.0358175	-0.0357312	-0.035673	-0.0354034	-0.0349297	-0.0347985	-0.0339129	-0.0338372	-0.0337813	-0.03373	-0.033414	-0.0331371	-0.0329563	-0.0329343	-0.0329169	-0.0327253	-0.0323045	-0.0323024	-0.032236	-0.0322	-0.0320528	-0.0314494	-0.031412	-0.0313599	-0.031207	-0.0309834	-0.0309505	-0.0309111	-0.0306112	-0.0303158	-0.030295	-0.0302462	-0.0300707	-0.0299792	-0.0298747	-0.0298495	-0.029721	-0.0296927	-0.0296451	-0.0294712	-0.0292424	-0.0291283	-0.0289153
-0.037769	-0.0376861	-0.0376223	-0.0376169	-0.0369469	-0.0364929	-0.0359649	-0.0358441	-0.0357577	-0.0356995	-0.0354297	-0.0349557	-0.0348244	-0.0339381	-0.0338623	-0.0338064	-0.033755	-0.0334388	-0.0331617	-0.0329808	-0.0329588	-0.0329413	-0.0327496	-0.0323285	-0.0323264	-0.0322599	-0.0322239	-0.0320766	-0.0314728	-0.0314353	-0.0313832	-0.0312302	-0.0310064	-0.0309735	-0.0309341	-0.0306339	-0.0303383	-0.0303175	-0.0302686	-0.0300931	-0.0300014	-0.0298969	-0.0298716	-0.0297431	-0.0297147	-0.0296671	-0.0294931	-0.0292642	-0.0291499	-0.0289368
-0.0377793	-0.0376963	-0.0376326	-0.0376271	-0.036957	-0.0365029	-0.0359747	-0.0358538	-0.0357674	-0.0357092	-0.0354394	-0.0349652	-0.0348339	-0.0339474	-0.0338716	-0.0338156	-0.0337642	-0.0334479	-0.0331707	-0.0329898	-0.0329678	-0.0329503	-0.0327585	-0.0323373	-0.0323352	-0.0322687	-0.0322326	-0.0320853	-0.0314814	-0.0314439	-0.0313917	-0.0312387	-0.0310149	-0.0309819	-0.0309425	-0.0306423	-0.0303466	-0.0303257	-0.0302769	-0.0301013	-0.0300096	-0.029905	-0.0298798	-0.0297512	-0.0297228	-0.0296752	-0.0295011	-0.0292721	-0.0291579	-0.0289447
-0.0377815	-0.0376985	-0.0376347	-0.0376292	-0.0369591	-0.0365049	-0.0359767	-0.0358559	-0.0357694	-0.0357112	-0.0354414	-0.0349672	-0.0348358	-0.0339493	-0.0338735	-0.0338175	-0.0337661	-0.0334498	-0.0331726	-0.0329916	-0.0329696	-0.0329522	-0.0327603	-0.0323391	-0.032337	-0.0322705	-0.0322345	-0.0320871	-0.0314831	-0.0314456	-0.0313935	-0.0312404	-0.0310166	-0.0309837	-0.0309443	-0.030644	-0.0303483	-0.0303275	-0.0302786	-0.030103	-0.0300113	-0.0299067	-0.0298814	-0.0297529	-0.0297245	-0.0296768	-0.0295028	-0.0292738	-0.0291595	-0.0289463
-0.0377981	-0.037715	-0.0376512	-0.0376458	-0.0369753	-0.036521	-0.0359926	-0.0358716	-0.0357852	-0.0357269	-0.0354569	-0.0349825	-0.0348511	-0.0339642	-0.0338884	-0.0338324	-0.033781	-0.0334645	-0.0331872	-0.0330061	-0.0329841	-0.0329667	-0.0327747	-0.0323534	-0.0323512	-0.0322847	-0.0322486	-0.0321012	-0.031497	-0.0314595	-0.0314073	-0.0312542	-0.0310303	-0.0309973	-0.0309579	-0.0306575	-0.0303616	-0.0303408	-0.0302919	-0.0301162	-0.0300245	-0.0299199	-0.0298946	-0.0297659	-0.0297376	-0.0296899	-0.0295158	-0.0292867	-0.0291723	-0.028959
-0.0378066	-0.0377235	-0.0376597	-0.0376543	-0.0369836	-0.0365292	-0.0360007	-0.0358797	-0.0357932	-0.035735	-0.0354649	-0.0349904	-0.034859	-0.0339718	-0.033896	-0.03384	-0.0337886	-0.0334721	-0.0331946	-0.0330136	-0.0329915	-0.0329741	-0.0327821	-0.0323606	-0.0323585	-0.032292	-0.0322559	-0.0321085	-0.0315041	-0.0314665	-0.0314144	-0.0312612	-0.0310372	-0.0310043	-0.0309648	-0.0306644	-0.0303685	-0.0303476	-0.0302987	-0.030123	-0.0300312	-0.0299266	-0.0299013	-0.0297726	-0.0297443	-0.0296966	-0.0295224	-0.0292932	-0.0291789	-0.0289656
-0.0378231	-0.0377401	-0.0376762	-0.0376708	-0.0369999	-0.0365452	-0.0360164	-0.0358954	-0.0358089	-0.0357506	-0.0354805	-0.0350058	-0.0348743	-0.0339867	-0.0339108	-0.0338548	-0.0338034	-0.0334867	-0.0332092	-0.033028	-0.033006	-0.0329885	-0.0327965	-0.0323748	-0.0323727	-0.0323061	-0.03227	-0.0321225	-0.0315179	-0.0314803	-0.0314281	-0.0312749	-0.0310508	-0.0310179	-0.0309784	-0.0306778	-0.0303818	-0.0303609	-0.030312	-0.0301362	-0.0300444	-0.0299397	-0.0299144	-0.0297857	-0.0297573	-0.0297096	-0.0295354	-0.0293061	-0.0291917	-0.0289783
-0.0378556	-0.0377725	-0.0377086	-0.0377031	-0.0370316	-0.0365766	-0.0360474	-0.0359262	-0.0358396	-0.0357813	-0.0355109	-0.0350358	-0.0349042	-0.0340159	-0.0339399	-0.0338839	-0.0338324	-0.0335155	-0.0332377	-0.0330564	-0.0330343	-0.0330168	-0.0328246	-0.0324026	-0.0324005	-0.0323339	-0.0322977	-0.0321501	-0.0315449	-0.0315074	-0.0314551	-0.0313017	-0.0310775	-0.0310445	-0.031005	-0.0307042	-0.0304078	-0.030387	-0.030338	-0.030162	-0.0300702	-0.0299654	-0.0299401	-0.0298112	-0.0297828	-0.0297351	-0.0295607	-0.0293312	-0.0292167	-0.0290031
-0.0378563	-0.0377732	-0.0377093	-0.0377038	-0.0370323	-0.0365773	-0.036048	-0.0359269	-0.0358403	-0.035782	-0.0355116	-0.0350365	-0.0349049	-0.0340165	-0.0339406	-0.0338845	-0.033833	-0.0335161	-0.0332383	-0.033057	-0.033035	-0.0330175	-0.0328253	-0.0324032	-0.0324011	-0.0323345	-0.0322983	-0.0321507	-0.0315455	-0.031508	-0.0314557	-0.0313023	-0.0310781	-0.0310451	-0.0310056	-0.0307047	-0.0304084	-0.0303876	-0.0303386	-0.0301626	-0.0300708	-0.029966	-0.0299407	-0.0298118	-0.0297834	-0.0297356	-0.0295613	-0.0293318	-0.0292173	-0.0290037
-0.0378719	-0.0377887	-0.0377248	-0.0377193	-0.0370475	-0.0365923	-0.0360628	-0.0359417	-0.035855	-0.0357967	-0.0355262	-0.0350508	-0.0349192	-0.0340305	-0.0339545	-0.0338984	-0.0338469	-0.0335299	-0.0332519	-0.0330706	-0.0330485	-0.033031	-0.0328387	-0.0324165	-0.0324144	-0.0323477	-0.0323116	-0.0321639	-0.0315585	-0.0315209	-0.0314686	-0.0313152	-0.0310908	-0.0310578	-0.0310183	-0.0307173	-0.0304209	-0.0304	-0.030351	-0.030175	-0.0300831	-0.0299783	-0.029953	-0.029824	-0.0297956	-0.0297478	-0.0295734	-0.0293438	-0.0292293	-0.0290156
-0.037907	-0.0378237	-0.0377598	-0.0377543	-0.0370819	-0.0366262	-0.0360963	-0.035975	-0.0358883	-0.0358299	-0.0355591	-0.0350834	-0.0349516	-0.0340621	-0.033986	-0.0339299	-0.0338783	-0.033561	-0.0332828	-0.0331012	-0.0330792	-0.0330617	-0.0328692	-0.0324466	-0.0324445	-0.0323778	-0.0323416	-0.0321938	-0.0315877	-0.0315501	-0.0314978	-0.0313442	-0.0311197	-0.0310866	-0.0310471	-0.0307458	-0.0304491	-0.0304282	-0.0303792	-0.030203	-0.030111	-0.0300061	-0.0299807	-0.0298517	-0.0298233	-0.0297754	-0.0296008	-0.0293711	-0.0292564	-0.0290425
-0.0379233	-0.03784	-0.037776	-0.0377705	-0.0370978	-0.0366419	-0.0361118	-0.0359904	-0.0359037	-0.0358452	-0.0355744	-0.0350984	-0.0349666	-0.0340767	-0.0340006	-0.0339445	-0.0338929	-0.0335754	-0.0332971	-0.0331154	-0.0330934	-0.0330758	-0.0328833	-0.0324605	-0.0324584	-0.0323916	-0.0323554	-0.0322076	-0.0316013	-0.0315637	-0.0315113	-0.0313577	-0.031133	-0.0311	-0.0310604	-0.030759	-0.0304622	-0.0304413	-0.0303922	-0.030216	-0.0301239	-0.030019	-0.0299936	-0.0298645	-0.0298361	-0.0297882	-0.0296135	-0.0293837	-0.029269	-0.029055
-0.0380039	-0.0379205	-0.0378563	-0.0378508	-0.0371767	-0.0367199	-0.0361886	-0.036067	-0.0359801	-0.0359215	-0.0356501	-0.0351731	-0.035041	-0.0341492	-0.0340729	-0.0340167	-0.033965	-0.0336468	-0.0333679	-0.0331859	-0.0331638	-0.0331462	-0.0329533	-0.0325296	-0.0325274	-0.0324606	-0.0324243	-0.0322761	-0.0316685	-0.0316308	-0.0315784	-0.0314244	-0.0311993	-0.0311662	-0.0311265	-0.0308245	-0.030527	-0.0305061	-0.0304569	-0.0302802	-0.030188	-0.0300828	-0.0300574	-0.0299281	-0.0298996	-0.0298516	-0.0296765	-0.0294462	-0.0293312	-0.0291168
-0.0380323	-0.0379488	-0.0378846	-0.0378791	-0.0372045	-0.0367473	-0.0362156	-0.0360939	-0.036007	-0.0359484	-0.0356767	-0.0351994	-0.0350671	-0.0341747	-0.0340984	-0.0340421	-0.0339903	-0.0336719	-0.0333929	-0.0332107	-0.0331886	-0.033171	-0.0329779	-0.0325539	-0.0325517	-0.0324848	-0.0324485	-0.0323002	-0.0316922	-0.0316545	-0.031602	-0.0314479	-0.0312226	-0.0311894	-0.0311497	-0.0308475	-0.0305498	-0.0305288	-0.0304796	-0.0303029	-0.0302106	-0.0301053	-0.0300799	-0.0299504	-0.0299219	-0.0298739	-0.0296987	-0.0294682	-0.0293531	-0.0291385
-0.0380331	-0.0379496	-0.0378854	-0.0378799	-0.0372052	-0.0367481	-0.0362164	-0.0360947	-0.0360077	-0.0359491	-0.0356774	-0.0352001	-0.0350679	-0.0341754	-0.0340991	-0.0340428	-0.033991	-0.0336726	-0.0333935	-0.0332114	-0.0331892	-0.0331717	-0.0329785	-0.0325546	-0.0325524	-0.0324855	-0.0324492	-0.0323009	-0.0316928	-0.0316551	-0.0316026	-0.0314485	-0.0312232	-0.0311901	-0.0311504	-0.0308481	-0.0305504	-0.0305295	-0.0304803	-0.0303035	-0.0302112	-0.0301059	-0.0300805	-0.029951	-0.0299225	-0.0298745	-0.0296993	-0.0294688	-0.0293537	-0.0291391
-0.0380332	-0.0379496	-0.0378854	-0.0378799	-0.0372053	-0.0367481	-0.0362164	-0.0360947	-0.0360077	-0.0359491	-0.0356775	-0.0352001	-0.0350679	-0.0341754	-0.0340991	-0.0340428	-0.0339911	-0.0336727	-0.0333936	-0.0332114	-0.0331893	-0.0331717	-0.0329786	-0.0325546	-0.0325525	-0.0324855	-0.0324492	-0.0323009	-0.0316929	-0.0316551	-0.0316027	-0.0314486	-0.0312233	-0.0311901	-0.0311504	-0.0308482	-0.0305505	-0.0305295	-0.0304803	-0.0303035	-0.0302112	-0.030106	-0.0300805	-0.0299511	-0.0299225	-0.0298745	-0.0296994	-0.0294688	-0.0293538	-0.0291392
-0.0380421	-0.0379585	-0.0378943	-0.0378888	-0.037214	-0.0367568	-0.0362249	-0.0361032	-0.0360162	-0.0359576	-0.0356859	-0.0352084	-0.0350761	-0.0341835	-0.0341071	-0.0340508	-0.0339991	-0.0336806	-0.0334014	-0.0332192	-0.0331971	-0.0331795	-0.0329863	-0.0325622	-0.0325601	-0.0324931	-0.0324568	-0.0323085	-0.0317003	-0.0316626	-0.0316101	-0.0314559	-0.0312306	-0.0311974	-0.0311577	-0.0308554	-0.0305576	-0.0305367	-0.0304875	-0.0303106	-0.0302183	-0.030113	-0.0300876	-0.0299581	-0.0299296	-0.0298816	-0.0297063	-0.0294757	-0.0293607	-0.029146
-0.0380437	-0.0379601	-0.0378959	-0.0378904	-0.0372156	-0.0367583	-0.0362265	-0.0361047	-0.0360177	-0.0359591	-0.0356874	-0.0352099	-0.0350776	-0.0341849	-0.0341086	-0.0340522	-0.0340005	-0.033682	-0.0334028	-0.0332206	-0.0331985	-0.0331809	-0.0329877	-0.0325636	-0.0325615	-0.0324945	-0.0324582	-0.0323098	-0.0317016	-0.0316639	-0.0316114	-0.0314573	-0.0312319	-0.0311987	-0.031159	-0.0308567	-0.0305589	-0.030538	-0.0304887	-0.0303119	-0.0302196	-0.0301143	-0.0300889	-0.0299594	-0.0299308	-0.0298828	-0.0297076	-0.029477	-0.0293619	-0.0291472
-0.0380511	-0.0379675	-0.0379033	-0.0378978	-0.0372229	-0.0367655	-0.0362335	-0.0361118	-0.0360248	-0.0359661	-0.0356943	-0.0352168	-0.0350845	-0.0341916	-0.0341152	-0.0340589	-0.0340071	-0.0336886	-0.0334094	-0.0332271	-0.033205	-0.0331874	-0.0329942	-0.03257	-0.0325678	-0.0325009	-0.0324645	-0.0323162	-0.0317078	-0.0316701	-0.0316176	-0.0314634	-0.031238	-0.0312048	-0.0311651	-0.0308627	-0.0305649	-0.0305439	-0.0304947	-0.0303178	-0.0302255	-0.0301202	-0.0300947	-0.0299652	-0.0299367	-0.0298887	-0.0297134	-0.0294827	-0.0293677	-0.0291529
-0.0380612	-0.0379776	-0.0379134	-0.0379079	-0.0372328	-0.0367753	-0.0362432	-0.0361214	-0.0360343	-0.0359757	-0.0357038	-0.0352261	-0.0350938	-0.0342007	-0.0341243	-0.034068	-0.0340162	-0.0336975	-0.0334182	-0.0332359	-0.0332138	-0.0331962	-0.0330029	-0.0325786	-0.0325765	-0.0325095	-0.0324732	-0.0323247	-0.0317163	-0.0316785	-0.031626	-0.0314718	-0.0312463	-0.0312131	-0.0311734	-0.0308709	-0.030573	-0.030552	-0.0305028	-0.0303259	-0.0302335	-0.0301282	-0.0301027	-0.0299732	-0.0299446	-0.0298966	-0.0297213	-0.0294906	-0.0293755	-0.0291607
-0.0380732	-0.0379896	-0.0379253	-0.0379198	-0.0372445	-0.0367868	-0.0362546	-0.0361327	-0.0360457	-0.035987	-0.0357151	-0.0352372	-0.0351048	-0.0342114	-0.034135	-0.0340787	-0.0340269	-0.0337081	-0.0334287	-0.0332464	-0.0332242	-0.0332066	-0.0330133	-0.0325889	-0.0325867	-0.0325197	-0.0324834	-0.0323349	-0.0317262	-0.0316885	-0.0316359	-0.0314817	-0.0312561	-0.031223	-0.0311832	-0.0308807	-0.0305826	-0.0305617	-0.0305124	-0.0303354	-0.030243	-0.0301377	-0.0301122	-0.0299826	-0.029954	-0.029906	-0.0297306	-0.0294998	-0.0293847	-0.0291699
-0.0380816	-0.0379979	-0.0379337	-0.0379282	-0.0372527	-0.0367949	-0.0362625	-0.0361407	-0.0360536	-0.0359949	-0.0357229	-0.0352449	-0.0351126	-0.034219	-0.0341426	-0.0340862	-0.0340344	-0.0337156	-0.0334361	-0.0332537	-0.0332315	-0.0332139	-0.0330206	-0.032596	-0.0325939	-0.0325269	-0.0324905	-0.032342	-0.0317332	-0.0316954	-0.0316429	-0.0314886	-0.031263	-0.0312298	-0.0311901	-0.0308874	-0.0305894	-0.0305684	-0.0305191	-0.0303421	-0.0302497	-0.0301443	-0.0301188	-0.0299892	-0.0299606	-0.0299126	-0.0297372	-0.0295063	-0.0293912	-0.0291763
-0.0380997	-0.038016	-0.0379517	-0.0379462	-0.0372704	-0.0368124	-0.0362798	-0.0361579	-0.0360707	-0.036012	-0.0357399	-0.0352617	-0.0351293	-0.0342352	-0.0341588	-0.0341024	-0.0340505	-0.0337316	-0.033452	-0.0332695	-0.0332473	-0.0332297	-0.0330363	-0.0326115	-0.0326094	-0.0325424	-0.032506	-0.0323574	-0.0317483	-0.0317105	-0.0316579	-0.0315036	-0.0312779	-0.0312447	-0.0312049	-0.0309021	-0.0306039	-0.0305829	-0.0305336	-0.0303565	-0.0302641	-0.0301586	-0.0301331	-0.0300035	-0.0299749	-0.0299268	-0.0297513	-0.0295204	-0.0294051	-0.0291901
-0.0381139	-0.0380302	-0.0379658	-0.0379603	-0.0372843	-0.0368261	-0.0362933	-0.0361714	-0.0360842	-0.0360254	-0.0357532	-0.0352748	-0.0351423	-0.034248	-0.0341715	-0.0341151	-0.0340632	-0.0337442	-0.0334645	-0.0332819	-0.0332597	-0.0332421	-0.0330486	-0.0326237	-0.0326216	-0.0325545	-0.0325181	-0.0323695	-0.0317601	-0.0317223	-0.0316697	-0.0315153	-0.0312895	-0.0312563	-0.0312165	-0.0309136	-0.0306153	-0.0305943	-0.030545	-0.0303678	-0.0302753	-0.0301699	-0.0301444	-0.0300146	-0.0299861	-0.029938	-0.0297624	-0.0295314	-0.0294161	-0.029201
-0.0381273	-0.0380436	-0.0379792	-0.0379737	-0.0372974	-0.0368391	-0.0363061	-0.0361841	-0.0360969	-0.0360381	-0.0357658	-0.0352873	-0.0351547	-0.03426	-0.0341835	-0.0341271	-0.0340752	-0.033756	-0.0334762	-0.0332936	-0.0332714	-0.0332538	-0.0330602	-0.0326352	-0.032633	-0.0325659	-0.0325295	-0.0323809	-0.0317713	-0.0317335	-0.0316809	-0.0315264	-0.0313005	-0.0312673	-0.0312275	-0.0309245	-0.0306261	-0.0306051	-0.0305558	-0.0303785	-0.030286	-0.0301805	-0.030155	-0.0300252	-0.0299966	-0.0299485	-0.0297729	-0.0295418	-0.0294264	-0.0292113
-0.0381394	-0.0380557	-0.0379913	-0.0379858	-0.0373093	-0.0368508	-0.0363176	-0.0361956	-0.0361084	-0.0360496	-0.0357772	-0.0352985	-0.0351659	-0.034271	-0.0341944	-0.034138	-0.0340861	-0.0337668	-0.0334869	-0.0333042	-0.033282	-0.0332644	-0.0330707	-0.0326456	-0.0326434	-0.0325763	-0.0325399	-0.0323912	-0.0317814	-0.0317436	-0.031691	-0.0315364	-0.0313105	-0.0312773	-0.0312375	-0.0309344	-0.0306358	-0.0306148	-0.0305655	-0.0303882	-0.0302956	-0.0301901	-0.0301646	-0.0300348	-0.0300062	-0.029958	-0.0297824	-0.0295512	-0.0294358	-0.0292206
-0.0381427	-0.0380589	-0.0379946	-0.0379891	-0.0373125	-0.036854	-0.0363208	-0.0361987	-0.0361115	-0.0360527	-0.0357802	-0.0353015	-0.0351689	-0.0342739	-0.0341974	-0.0341409	-0.034089	-0.0337697	-0.0334898	-0.0333071	-0.0332849	-0.0332673	-0.0330736	-0.0326484	-0.0326462	-0.0325791	-0.0325427	-0.0323939	-0.0317842	-0.0317463	-0.0316937	-0.0315391	-0.0313132	-0.03128	-0.0312401	-0.030937	-0.0306385	-0.0306174	-0.0305681	-0.0303908	-0.0302982	-0.0301927	-0.0301672	-0.0300373	-0.0300087	-0.0299606	-0.0297849	-0.0295537	-0.0294383	-0.0292231
-0.0381639	-0.03808	-0.0380156	-0.0380101	-0.0373332	-0.0368744	-0.0363409	-0.0362188	-0.0361315	-0.0360727	-0.0358001	-0.0353211	-0.0351884	-0.0342929	-0.0342163	-0.0341598	-0.0341079	-0.0337884	-0.0335083	-0.0333256	-0.0333033	-0.0332857	-0.0330919	-0.0326665	-0.0326643	-0.0325972	-0.0325607	-0.0324119	-0.0318018	-0.0317639	-0.0317113	-0.0315566	-0.0313306	-0.0312973	-0.0312575	-0.0309542	-0.0306555	-0.0306344	-0.0305851	-0.0304077	-0.0303151	-0.0302094	-0.0301839	-0.030054	-0.0300254	-0.0299772	-0.0298014	-0.0295701	-0.0294547	-0.0292393
-0.0381723	-0.0380885	-0.0380241	-0.0380186	-0.0373415	-0.0368826	-0.036349	-0.0362268	-0.0361395	-0.0360807	-0.035808	-0.035329	-0.0351962	-0.0343005	-0.0342239	-0.0341674	-0.0341155	-0.0337959	-0.0335158	-0.033333	-0.0333107	-0.0332931	-0.0330993	-0.0326737	-0.0326716	-0.0326044	-0.032568	-0.0324191	-0.0318089	-0.031771	-0.0317183	-0.0315637	-0.0313375	-0.0313043	-0.0312644	-0.0309611	-0.0306623	-0.0306412	-0.0305919	-0.0304144	-0.0303218	-0.0302161	-0.0301906	-0.0300607	-0.030032	-0.0299839	-0.0298081	-0.0295767	-0.0294612	-0.0292458
-0.0382042	-0.0381203	-0.0380558	-0.0380503	-0.0373726	-0.0369134	-0.0363793	-0.036257	-0.0361697	-0.0361108	-0.0358379	-0.0353584	-0.0352256	-0.0343291	-0.0342525	-0.0341959	-0.0341439	-0.0338241	-0.0335437	-0.0333608	-0.0333385	-0.0333209	-0.0331269	-0.032701	-0.0326988	-0.0326316	-0.0325951	-0.0324461	-0.0318354	-0.0317975	-0.0317448	-0.03159	-0.0313637	-0.0313304	-0.0312905	-0.0309869	-0.0306878	-0.0306668	-0.0306174	-0.0304398	-0.0303471	-0.0302413	-0.0302158	-0.0300858	-0.0300571	-0.0300089	-0.0298329	-0.0296013	-0.0294858	-0.0292702
-0.0382658	-0.0381818	-0.0381172	-0.0381117	-0.0374329	-0.0369729	-0.036438	-0.0363155	-0.036228	-0.036169	-0.0358957	-0.0354154	-0.0352824	-0.0343845	-0.0343077	-0.0342511	-0.034199	-0.0338787	-0.0335978	-0.0334146	-0.0333923	-0.0333746	-0.0331803	-0.0327537	-0.0327516	-0.0326842	-0.0326477	-0.0324985	-0.0318867	-0.0318488	-0.031796	-0.0316409	-0.0314142	-0.0313809	-0.031341	-0.0310369	-0.0307373	-0.0307162	-0.0306668	-0.0304889	-0.030396	-0.0302901	-0.0302645	-0.0301343	-0.0301056	-0.0300573	-0.029881	-0.0296491	-0.0295333	-0.0293174
-0.0382695	-0.0381854	-0.0381208	-0.0381153	-0.0374365	-0.0369765	-0.0364415	-0.036319	-0.0362315	-0.0361725	-0.0358992	-0.0354189	-0.0352858	-0.0343878	-0.034311	-0.0342544	-0.0342023	-0.0338819	-0.0336011	-0.0334178	-0.0333955	-0.0333778	-0.0331835	-0.0327569	-0.0327547	-0.0326874	-0.0326508	-0.0325016	-0.0318898	-0.0318518	-0.031799	-0.031644	-0.0314173	-0.0313839	-0.031344	-0.0310399	-0.0307403	-0.0307192	-0.0306697	-0.0304918	-0.030399	-0.030293	-0.0302674	-0.0301372	-0.0301085	-0.0300602	-0.0298839	-0.0296519	-0.0295362	-0.0293202
-0.0382738	-0.0381897	-0.0381251	-0.0381196	-0.0374407	-0.0369806	-0.0364456	-0.0363231	-0.0362356	-0.0361766	-0.0359032	-0.0354228	-0.0352898	-0.0343917	-0.0343149	-0.0342582	-0.0342061	-0.0338857	-0.0336048	-0.0334215	-0.0333993	-0.0333816	-0.0331872	-0.0327606	-0.0327584	-0.032691	-0.0326545	-0.0325053	-0.0318934	-0.0318554	-0.0318026	-0.0316475	-0.0314208	-0.0313874	-0.0313475	-0.0310433	-0.0307437	-0.0307227	-0.0306731	-0.0304952	-0.0304024	-0.0302964	-0.0302708	-0.0301406	-0.0301118	-0.0300635	-0.0298873	-0.0296553	-0.0295395	-0.0293235
-0.0382785	-0.0381944	-0.0381298	-0.0381243	-0.0374453	-0.0369852	-0.03645	-0.0363276	-0.03624	-0.036181	-0.0359076	-0.0354272	-0.0352941	-0.0343959	-0.0343191	-0.0342624	-0.0342103	-0.0338899	-0.033609	-0.0334256	-0.0334034	-0.0333857	-0.0331913	-0.0327646	-0.0327624	-0.0326951	-0.0326585	-0.0325092	-0.0318973	-0.0318593	-0.0318065	-0.0316514	-0.0314247	-0.0313913	-0.0313513	-0.0310471	-0.0307475	-0.0307264	-0.0306769	-0.030499	-0.0304061	-0.0303001	-0.0302745	-0.0301443	-0.0301155	-0.0300672	-0.0298909	-0.0296589	-0.0295431	-0.0293271
-0.038334	-0.0382498	-0.0381851	-0.0381796	-0.0374996	-0.0370388	-0.0365029	-0.0363803	-0.0362926	-0.0362335	-0.0359597	-0.0354786	-0.0353453	-0.0344458	-0.0343689	-0.0343121	-0.03426	-0.0339391	-0.0336578	-0.0334742	-0.0334518	-0.0334341	-0.0332395	-0.0328121	-0.03281	-0.0327425	-0.0327059	-0.0325564	-0.0319436	-0.0319056	-0.0318527	-0.0316973	-0.0314703	-0.0314369	-0.0313968	-0.0310922	-0.0307921	-0.030771	-0.0307214	-0.0305433	-0.0304502	-0.0303441	-0.0303185	-0.030188	-0.0301593	-0.0301109	-0.0299343	-0.0297019	-0.029586	-0.0293697
-0.0383877	-0.0383033	-0.0382386	-0.038233	-0.0375521	-0.0370907	-0.036554	-0.0364312	-0.0363434	-0.0362842	-0.03601	-0.0355282	-0.0353948	-0.034494	-0.034417	-0.0343601	-0.0343079	-0.0339865	-0.0337048	-0.033521	-0.0334986	-0.0334809	-0.033286	-0.032858	-0.0328559	-0.0327883	-0.0327517	-0.032602	-0.0319883	-0.0319502	-0.0318972	-0.0317417	-0.0315143	-0.0314808	-0.0314408	-0.0311357	-0.0308352	-0.0308141	-0.0307644	-0.030586	-0.0304928	-0.0303866	-0.0303609	-0.0302302	-0.0302014	-0.030153	-0.0299762	-0.0297435	-0.0296274	-0.0294108
-0.0383898	-0.0383055	-0.0382407	-0.0382351	-0.0375542	-0.0370927	-0.036556	-0.0364332	-0.0363454	-0.0362862	-0.036012	-0.0355302	-0.0353967	-0.0344959	-0.0344189	-0.034362	-0.0343098	-0.0339884	-0.0337067	-0.0335228	-0.0335005	-0.0334827	-0.0332878	-0.0328599	-0.0328577	-0.0327901	-0.0327535	-0.0326038	-0.03199	-0.031952	-0.031899	-0.0317434	-0.031516	-0.0314826	-0.0314425	-0.0311374	-0.0308369	-0.0308158	-0.0307661	-0.0305877	-0.0304945	-0.0303882	-0.0303626	-0.0302319	-0.0302031	-0.0301547	-0.0299778	-0.0297451	-0.029629	-0.0294124
-0.0384095	-0.0383251	-0.0382603	-0.0382548	-0.0375735	-0.0371118	-0.0365748	-0.0364519	-0.036364	-0.0363048	-0.0360305	-0.0355484	-0.0354149	-0.0345136	-0.0344366	-0.0343797	-0.0343274	-0.0340059	-0.033724	-0.0335401	-0.0335177	-0.0334999	-0.0333049	-0.0328767	-0.0328746	-0.032807	-0.0327703	-0.0326205	-0.0320065	-0.0319684	-0.0319154	-0.0317597	-0.0315322	-0.0314987	-0.0314587	-0.0311534	-0.0308528	-0.0308316	-0.0307819	-0.0306034	-0.0305102	-0.0304039	-0.0303782	-0.0302474	-0.0302186	-0.0301702	-0.0299932	-0.0297604	-0.0296442	-0.0294275
-0.0384349	-0.0383505	-0.0382856	-0.0382801	-0.0375983	-0.0371363	-0.036599	-0.036476	-0.0363881	-0.0363289	-0.0360543	-0.0355719	-0.0354383	-0.0345364	-0.0344593	-0.0344024	-0.0343501	-0.0340284	-0.0337463	-0.0335622	-0.0335399	-0.0335221	-0.0333269	-0.0328985	-0.0328963	-0.0328287	-0.032792	-0.0326421	-0.0320276	-0.0319895	-0.0319365	-0.0317807	-0.0315531	-0.0315196	-0.0314795	-0.031174	-0.0308732	-0.030852	-0.0308023	-0.0306236	-0.0305303	-0.030424	-0.0303983	-0.0302674	-0.0302386	-0.0301901	-0.0300131	-0.0297801	-0.0296638	-0.029447
-0.0384368	-0.0383524	-0.0382875	-0.038282	-0.0376002	-0.0371382	-0.0366008	-0.0364778	-0.0363899	-0.0363307	-0.0360562	-0.0355737	-0.0354401	-0.0345382	-0.0344611	-0.0344042	-0.0343519	-0.0340301	-0.033748	-0.0335639	-0.0335415	-0.0335238	-0.0333286	-0.0329001	-0.032898	-0.0328303	-0.0327936	-0.0326437	-0.0320293	-0.0319911	-0.0319381	-0.0317823	-0.0315547	-0.0315212	-0.031481	-0.0311756	-0.0308747	-0.0308535	-0.0308038	-0.0306252	-0.0305319	-0.0304255	-0.0303998	-0.030269	-0.0302401	-0.0301916	-0.0300146	-0.0297816	-0.0296653	-0.0294484
-0.0384722	-0.0383877	-0.0383228	-0.0383172	-0.0376348	-0.0371724	-0.0366345	-0.0365114	-0.0364234	-0.0363641	-0.0360894	-0.0356065	-0.0354728	-0.03457	-0.0344928	-0.0344358	-0.0343835	-0.0340614	-0.0337791	-0.0335948	-0.0335724	-0.0335547	-0.0333593	-0.0329304	-0.0329283	-0.0328606	-0.0328238	-0.0326738	-0.0320588	-0.0320206	-0.0319675	-0.0318116	-0.0315837	-0.0315502	-0.03151	-0.0312043	-0.0309032	-0.030882	-0.0308322	-0.0306534	-0.03056	-0.0304535	-0.0304278	-0.0302968	-0.030268	-0.0302194	-0.0300422	-0.029809	-0.0296927	-0.0294756
-0.0384778	-0.0383933	-0.0383283	-0.0383228	-0.0376403	-0.0371777	-0.0366398	-0.0365167	-0.0364287	-0.0363694	-0.0360946	-0.0356116	-0.0354779	-0.034575	-0.0344978	-0.0344408	-0.0343885	-0.0340663	-0.033784	-0.0335997	-0.0335773	-0.0335595	-0.0333641	-0.0329352	-0.032933	-0.0328653	-0.0328286	-0.0326785	-0.0320634	-0.0320252	-0.0319721	-0.0318162	-0.0315883	-0.0315548	-0.0315146	-0.0312088	-0.0309076	-0.0308864	-0.0308366	-0.0306578	-0.0305644	-0.0304579	-0.0304322	-0.0303012	-0.0302724	-0.0302238	-0.0300466	-0.0298133	-0.029697	-0.0294798
-0.0384853	-0.0384008	-0.0383359	-0.0383303	-0.0376476	-0.037185	-0.036647	-0.0365239	-0.0364358	-0.0363765	-0.0361017	-0.0356186	-0.0354848	-0.0345818	-0.0345045	-0.0344476	-0.0343952	-0.034073	-0.0337906	-0.0336063	-0.0335839	-0.0335661	-0.0333707	-0.0329416	-0.0329395	-0.0328717	-0.032835	-0.0326849	-0.0320697	-0.0320315	-0.0319784	-0.0318225	-0.0315945	-0.0315609	-0.0315208	-0.0312149	-0.0309137	-0.0308925	-0.0308427	-0.0306638	-0.0305704	-0.0304639	-0.0304382	-0.0303072	-0.0302783	-0.0302297	-0.0300525	-0.0298192	-0.0297028	-0.0294856
-0.0384883	-0.0384038	-0.0383388	-0.0383333	-0.0376506	-0.0371879	-0.0366499	-0.0365267	-0.0364387	-0.0363794	-0.0361045	-0.0356214	-0.0354876	-0.0345844	-0.0345072	-0.0344502	-0.0343979	-0.0340757	-0.0337932	-0.0336089	-0.0335865	-0.0335687	-0.0333733	-0.0329442	-0.032942	-0.0328743	-0.0328376	-0.0326875	-0.0320722	-0.032034	-0.0319809	-0.0318249	-0.0315969	-0.0315634	-0.0315232	-0.0312173	-0.0309161	-0.0308949	-0.0308451	-0.0306662	-0.0305728	-0.0304662	-0.0304405	-0.0303095	-0.0302806	-0.0302321	-0.0300548	-0.0298215	-0.0297051	-0.0294879
-0.0384889	-0.0384044	-0.0383394	-0.0383339	-0.0376511	-0.0371885	-0.0366504	-0.0365273	-0.0364392	-0.0363799	-0.036105	-0.0356219	-0.0354881	-0.034585	-0.0345077	-0.0344508	-0.0343984	-0.0340762	-0.0337937	-0.0336094	-0.033587	-0.0335692	-0.0333738	-0.0329447	-0.0329425	-0.0328748	-0.0328381	-0.032688	-0.0320726	-0.0320345	-0.0319814	-0.0318254	-0.0315974	-0.0315639	-0.0315237	-0.0312178	-0.0309165	-0.0308953	-0.0308456	-0.0306666	-0.0305732	-0.0304667	-0.030441	-0.03031	-0.0302811	-0.0302325	-0.0300552	-0.0298219	-0.0297055	-0.0294883
-0.0385048	-0.0384202	-0.0383552	-0.0383497	-0.0376667	-0.0372038	-0.0366655	-0.0365423	-0.0364543	-0.0363949	-0.0361199	-0.0356366	-0.0355028	-0.0345992	-0.034522	-0.034465	-0.0344126	-0.0340902	-0.0338077	-0.0336233	-0.0336008	-0.033583	-0.0333875	-0.0329583	-0.0329561	-0.0328884	-0.0328516	-0.0327014	-0.0320859	-0.0320477	-0.0319945	-0.0318385	-0.0316104	-0.0315769	-0.0315367	-0.0312307	-0.0309293	-0.0309081	-0.0308583	-0.0306793	-0.0305859	-0.0304793	-0.0304535	-0.0303225	-0.0302936	-0.030245	-0.0300676	-0.0298342	-0.0297178	-0.0295005
-0.0385108	-0.0384262	-0.0383612	-0.0383556	-0.0376725	-0.0372096	-0.0366712	-0.036548	-0.0364599	-0.0364006	-0.0361255	-0.0356422	-0.0355083	-0.0346046	-0.0345273	-0.0344703	-0.0344179	-0.0340955	-0.0338129	-0.0336285	-0.0336061	-0.0335883	-0.0333927	-0.0329634	-0.0329612	-0.0328935	-0.0328567	-0.0327065	-0.0320909	-0.0320527	-0.0319995	-0.0318435	-0.0316153	-0.0315818	-0.0315416	-0.0312355	-0.0309341	-0.0309129	-0.0308631	-0.0306841	-0.0305906	-0.030484	-0.0304583	-0.0303272	-0.0302983	-0.0302497	-0.0300723	-0.0298389	-0.0297224	-0.0295051
-0.0385171	-0.0384325	-0.0383675	-0.0383619	-0.0376787	-0.0372157	-0.0366773	-0.036554	-0.0364659	-0.0364066	-0.0361315	-0.035648	-0.0355141	-0.0346103	-0.034533	-0.034476	-0.0344236	-0.0341011	-0.0338185	-0.033634	-0.0336116	-0.0335938	-0.0333982	-0.0329688	-0.0329667	-0.0328989	-0.0328621	-0.0327119	-0.0320961	-0.0320579	-0.0320048	-0.0318487	-0.0316206	-0.031587	-0.0315468	-0.0312407	-0.0309392	-0.030918	-0.0308681	-0.0306891	-0.0305956	-0.030489	-0.0304633	-0.0303322	-0.0303033	-0.0302547	-0.0300773	-0.0298438	-0.0297273	-0.0295099
-0.0385238	-0.0384392	-0.0383742	-0.0383686	-0.0376853	-0.0372222	-0.0366837	-0.0365604	-0.0364723	-0.0364129	-0.0361378	-0.0356543	-0.0355203	-0.0346164	-0.0345391	-0.034482	-0.0344296	-0.0341071	-0.0338244	-0.0336399	-0.0336175	-0.0335997	-0.0334041	-0.0329746	-0.0329724	-0.0329046	-0.0328679	-0.0327176	-0.0321018	-0.0320635	-0.0320104	-0.0318543	-0.0316261	-0.0315925	-0.0315523	-0.0312462	-0.0309446	-0.0309234	-0.0308735	-0.0306945	-0.030601	-0.0304944	-0.0304686	-0.0303375	-0.0303086	-0.03026	-0.0300825	-0.029849	-0.0297325	-0.0295151
-0.0385329	-0.0384483	-0.0383833	-0.0383777	-0.0376942	-0.037231	-0.0366923	-0.036569	-0.0364809	-0.0364215	-0.0361463	-0.0356627	-0.0355287	-0.0346245	-0.0345472	-0.0344902	-0.0344378	-0.0341152	-0.0338324	-0.0336478	-0.0336254	-0.0336076	-0.033412	-0.0329824	-0.0329802	-0.0329124	-0.0328756	-0.0327254	-0.0321093	-0.0320711	-0.0320179	-0.0318618	-0.0316336	-0.0316	-0.0315598	-0.0312535	-0.0309519	-0.0309307	-0.0308808	-0.0307017	-0.0306082	-0.0305016	-0.0304758	-0.0303447	-0.0303157	-0.0302671	-0.0300896	-0.0298561	-0.0297395	-0.0295221
-0.0385846	-0.0384998	-0.0384347	-0.0384291	-0.0377447	-0.0372809	-0.0367415	-0.036618	-0.0365298	-0.0364703	-0.0361947	-0.0357104	-0.0355763	-0.0346709	-0.0345935	-0.0345364	-0.0344839	-0.0341609	-0.0338777	-0.0336929	-0.0336704	-0.0336526	-0.0334567	-0.0330266	-0.0330244	-0.0329565	-0.0329197	-0.0327692	-0.0321523	-0.0321141	-0.0320608	-0.0319045	-0.0316759	-0.0316423	-0.031602	-0.0312954	-0.0309934	-0.0309721	-0.0309222	-0.0307429	-0.0306492	-0.0305424	-0.0305166	-0.0303853	-0.0303563	-0.0303077	-0.0301299	-0.029896	-0.0297793	-0.0295616
-0.0385851	-0.0385003	-0.0384352	-0.0384296	-0.0377452	-0.0372814	-0.036742	-0.0366185	-0.0365303	-0.0364708	-0.0361952	-0.0357109	-0.0355768	-0.0346714	-0.034594	-0.0345368	-0.0344844	-0.0341613	-0.0338782	-0.0336934	-0.0336709	-0.0336531	-0.0334572	-0.033027	-0.0330248	-0.0329569	-0.0329201	-0.0327696	-0.0321528	-0.0321145	-0.0320613	-0.0319049	-0.0316764	-0.0316427	-0.0316025	-0.0312958	-0.0309938	-0.0309725	-0.0309226	-0.0307433	-0.0306496	-0.0305428	-0.030517	-0.0303857	-0.0303568	-0.0303081	-0.0301303	-0.0298965	-0.0297798	-0.029562
-0.0385874	-0.0385027	-0.0384375	-0.038432	-0.0377475	-0.0372837	-0.0367442	-0.0366208	-0.0365325	-0.036473	-0.0361974	-0.0357131	-0.035579	-0.0346735	-0.0345961	-0.0345389	-0.0344864	-0.0341634	-0.0338802	-0.0336954	-0.033673	-0.0336551	-0.0334592	-0.033029	-0.0330268	-0.0329589	-0.0329221	-0.0327716	-0.0321547	-0.0321165	-0.0320632	-0.0319069	-0.0316783	-0.0316447	-0.0316044	-0.0312977	-0.0309957	-0.0309744	-0.0309245	-0.0307451	-0.0306515	-0.0305447	-0.0305189	-0.0303876	-0.0303586	-0.0303099	-0.0301322	-0.0298983	-0.0297816	-0.0295638
-0.038607	-0.0385222	-0.038457	-0.0384515	-0.0377667	-0.0373026	-0.0367629	-0.0366393	-0.036551	-0.0364915	-0.0362158	-0.0357312	-0.035597	-0.0346911	-0.0346136	-0.0345565	-0.0345039	-0.0341807	-0.0338974	-0.0337125	-0.03369	-0.0336722	-0.0334762	-0.0330458	-0.0330436	-0.0329757	-0.0329388	-0.0327883	-0.0321711	-0.0321328	-0.0320795	-0.031923	-0.0316943	-0.0316607	-0.0316204	-0.0313136	-0.0310114	-0.0309901	-0.0309402	-0.0307607	-0.030667	-0.0305602	-0.0305344	-0.030403	-0.030374	-0.0303253	-0.0301475	-0.0299134	-0.0297967	-0.0295788
-0.0386192	-0.0385343	-0.0384692	-0.0384636	-0.0377786	-0.0373143	-0.0367744	-0.0366509	-0.0365625	-0.036503	-0.0362272	-0.0357425	-0.0356082	-0.034702	-0.0346245	-0.0345674	-0.0345148	-0.0341915	-0.0339081	-0.0337231	-0.0337007	-0.0336828	-0.0334867	-0.0330562	-0.033054	-0.0329861	-0.0329492	-0.0327986	-0.0321812	-0.0321429	-0.0320896	-0.0319331	-0.0317043	-0.0316707	-0.0316304	-0.0313235	-0.0310212	-0.0309999	-0.0309499	-0.0307704	-0.0306767	-0.0305698	-0.030544	-0.0304126	-0.0303836	-0.0303348	-0.030157	-0.0299229	-0.0298061	-0.0295881
-0.038626	-0.0385412	-0.038476	-0.0384704	-0.0377853	-0.037321	-0.036781	-0.0366574	-0.036569	-0.0365095	-0.0362336	-0.0357488	-0.0356146	-0.0347082	-0.0346307	-0.0345735	-0.0345209	-0.0341976	-0.0339141	-0.0337291	-0.0337066	-0.0336888	-0.0334927	-0.0330621	-0.0330599	-0.0329919	-0.032955	-0.0328044	-0.0321869	-0.0321486	-0.0320953	-0.0319388	-0.03171	-0.0316763	-0.031636	-0.031329	-0.0310267	-0.0310054	-0.0309554	-0.0307759	-0.0306822	-0.0305753	-0.0305494	-0.030418	-0.030389	-0.0303402	-0.0301623	-0.0299282	-0.0298114	-0.0295934
-0.0386387	-0.0385538	-0.0384886	-0.038483	-0.0377977	-0.0373332	-0.036793	-0.0366694	-0.036581	-0.0365215	-0.0362455	-0.0357606	-0.0356262	-0.0347196	-0.034642	-0.0345848	-0.0345323	-0.0342088	-0.0339252	-0.0337402	-0.0337177	-0.0336998	-0.0335036	-0.0330729	-0.0330707	-0.0330027	-0.0329658	-0.0328152	-0.0321975	-0.0321591	-0.0321058	-0.0319493	-0.0317204	-0.0316867	-0.0316464	-0.0313393	-0.0310369	-0.0310156	-0.0309656	-0.030786	-0.0306922	-0.0305853	-0.0305594	-0.0304279	-0.0303989	-0.0303502	-0.0301722	-0.029938	-0.0298211	-0.0296031
-0.0386393	-0.0385544	-0.0384892	-0.0384836	-0.0377983	-0.0373338	-0.0367936	-0.03667	-0.0365816	-0.0365221	-0.0362461	-0.0357611	-0.0356268	-0.0347201	-0.0346426	-0.0345854	-0.0345328	-0.0342093	-0.0339258	-0.0337407	-0.0337182	-0.0337004	-0.0335042	-0.0330734	-0.0330713	-0.0330033	-0.0329664	-0.0328157	-0.032198	-0.0321596	-0.0321063	-0.0319498	-0.0317209	-0.0316872	-0.0316469	-0.0313398	-0.0310374	-0.0310161	-0.0309661	-0.0307865	-0.0306927	-0.0305858	-0.0305599	-0.0304284	-0.0303994	-0.0303507	-0.0301727	-0.0299385	-0.0298216	-0.0296036
-0.0386478	-0.0385629	-0.0384977	-0.0384921	-0.0378066	-0.037342	-0.0368017	-0.036678	-0.0365896	-0.0365301	-0.036254	-0.035769	-0.0356346	-0.0347277	-0.0346502	-0.034593	-0.0345404	-0.0342169	-0.0339332	-0.0337481	-0.0337256	-0.0337078	-0.0335115	-0.0330807	-0.0330785	-0.0330105	-0.0329736	-0.0328229	-0.032205	-0.0321667	-0.0321134	-0.0319568	-0.0317278	-0.0316942	-0.0316538	-0.0313467	-0.0310442	-0.0310229	-0.0309729	-0.0307932	-0.0306994	-0.0305925	-0.0305666	-0.0304351	-0.0304061	-0.0303573	-0.0301793	-0.029945	-0.0298282	-0.0296101
-0.0386528	-0.0385679	-0.0385026	-0.0384971	-0.0378114	-0.0373468	-0.0368064	-0.0366828	-0.0365944	-0.0365348	-0.0362587	-0.0357736	-0.0356392	-0.0347322	-0.0346547	-0.0345974	-0.0345448	-0.0342213	-0.0339376	-0.0337525	-0.03373	-0.0337121	-0.0335159	-0.033085	-0.0330828	-0.0330148	-0.0329779	-0.0328271	-0.0322092	-0.0321708	-0.0321175	-0.0319609	-0.0317319	-0.0316982	-0.0316579	-0.0313507	-0.0310482	-0.0310269	-0.0309769	-0.0307972	-0.0307034	-0.0305964	-0.0305706	-0.030439	-0.03041	-0.0303612	-0.0301832	-0.0299489	-0.029832	-0.0296139
-0.0386738	-0.0385889	-0.0385236	-0.038518	-0.037832	-0.0373672	-0.0368265	-0.0367028	-0.0366143	-0.0365547	-0.0362785	-0.0357931	-0.0356586	-0.0347511	-0.0346736	-0.0346163	-0.0345637	-0.0342399	-0.0339561	-0.0337709	-0.0337484	-0.0337305	-0.0335341	-0.033103	-0.0331008	-0.0330328	-0.0329958	-0.032845	-0.0322268	-0.0321884	-0.032135	-0.0319783	-0.0317492	-0.0317155	-0.0316752	-0.0313678	-0.0310651	-0.0310438	-0.0309938	-0.030814	-0.0307201	-0.0306131	-0.0305872	-0.0304556	-0.0304266	-0.0303778	-0.0301997	-0.0299652	-0.0298483	-0.02963
-0.0386747	-0.0385897	-0.0385244	-0.0385189	-0.0378328	-0.037368	-0.0368273	-0.0367035	-0.0366151	-0.0365555	-0.0362792	-0.0357938	-0.0356594	-0.0347519	-0.0346743	-0.034617	-0.0345644	-0.0342406	-0.0339568	-0.0337716	-0.0337491	-0.0337312	-0.0335348	-0.0331037	-0.0331015	-0.0330334	-0.0329965	-0.0328457	-0.0322274	-0.0321891	-0.0321357	-0.031979	-0.0317499	-0.0317162	-0.0316758	-0.0313685	-0.0310658	-0.0310444	-0.0309944	-0.0308146	-0.0307208	-0.0306137	-0.0305879	-0.0304563	-0.0304272	-0.0303784	-0.0302003	-0.0299659	-0.0298489	-0.0296307
-0.0387189	-0.0386339	-0.0385685	-0.038563	-0.0378762	-0.0374107	-0.0368695	-0.0367456	-0.036657	-0.0365973	-0.0363208	-0.0358348	-0.0357002	-0.0347917	-0.034714	-0.0346567	-0.034604	-0.0342798	-0.0339957	-0.0338103	-0.0337877	-0.0337698	-0.0335732	-0.0331416	-0.0331394	-0.0330713	-0.0330343	-0.0328833	-0.0322643	-0.0322259	-0.0321725	-0.0320156	-0.0317862	-0.0317525	-0.0317121	-0.0314044	-0.0311013	-0.03108	-0.0310299	-0.0308499	-0.030756	-0.0306488	-0.0306229	-0.0304911	-0.0304621	-0.0304132	-0.0302349	-0.0300002	-0.0298831	-0.0296646
-0.0387219	-0.0386369	-0.0385715	-0.038566	-0.0378791	-0.0374136	-0.0368723	-0.0367484	-0.0366599	-0.0366002	-0.0363236	-0.0358376	-0.035703	-0.0347944	-0.0347167	-0.0346593	-0.0346067	-0.0342825	-0.0339983	-0.0338129	-0.0337903	-0.0337725	-0.0335758	-0.0331442	-0.033142	-0.0330738	-0.0330369	-0.0328859	-0.0322668	-0.0322284	-0.032175	-0.0320181	-0.0317887	-0.031755	-0.0317146	-0.0314068	-0.0311037	-0.0310824	-0.0310323	-0.0308523	-0.0307584	-0.0306512	-0.0306253	-0.0304935	-0.0304644	-0.0304156	-0.0302372	-0.0300025	-0.0298854	-0.0296669
-0.0387231	-0.038638	-0.0385727	-0.0385671	-0.0378802	-0.0374147	-0.0368734	-0.0367495	-0.0366609	-0.0366013	-0.0363247	-0.0358387	-0.0357041	-0.0347954	-0.0347177	-0.0346604	-0.0346077	-0.0342835	-0.0339993	-0.0338139	-0.0337913	-0.0337734	-0.0335768	-0.0331451	-0.033143	-0.0330748	-0.0330378	-0.0328868	-0.0322678	-0.0322294	-0.0321759	-0.032019	-0.0317897	-0.0317559	-0.0317155	-0.0314078	-0.0311047	-0.0310833	-0.0310332	-0.0308532	-0.0307593	-0.0306521	-0.0306262	-0.0304944	-0.0304653	-0.0304165	-0.0302381	-0.0300034	-0.0298863	-0.0296678
-0.0387336	-0.0386485	-0.0385832	-0.0385776	-0.0378905	-0.0374249	-0.0368834	-0.0367595	-0.0366709	-0.0366112	-0.0363345	-0.0358484	-0.0357137	-0.0348048	-0.0347271	-0.0346698	-0.0346171	-0.0342928	-0.0340086	-0.0338231	-0.0338005	-0.0337826	-0.0335859	-0.0331541	-0.033152	-0.0330838	-0.0330468	-0.0328958	-0.0322765	-0.0322381	-0.0321847	-0.0320277	-0.0317983	-0.0317645	-0.0317241	-0.0314163	-0.0311131	-0.0310918	-0.0310416	-0.0308616	-0.0307676	-0.0306604	-0.0306345	-0.0305027	-0.0304736	-0.0304247	-0.0302463	-0.0300115	-0.0298944	-0.0296758
-0.0387377	-0.0386526	-0.0385872	-0.0385816	-0.0378945	-0.0374288	-0.0368873	-0.0367633	-0.0366747	-0.036615	-0.0363383	-0.0358521	-0.0357175	-0.0348085	-0.0347308	-0.0346734	-0.0346207	-0.0342964	-0.0340121	-0.0338266	-0.0338041	-0.0337862	-0.0335895	-0.0331576	-0.0331554	-0.0330873	-0.0330503	-0.0328992	-0.0322799	-0.0322415	-0.032188	-0.0320311	-0.0318016	-0.0317679	-0.0317274	-0.0314196	-0.0311164	-0.031095	-0.0310449	-0.0308648	-0.0307708	-0.0306636	-0.0306377	-0.0305059	-0.0304768	-0.0304279	-0.0302495	-0.0300147	-0.0298975	-0.0296789
-0.0387412	-0.0386561	-0.0385907	-0.0385851	-0.0378979	-0.0374323	-0.0368907	-0.0367667	-0.0366781	-0.0366184	-0.0363417	-0.0358554	-0.0357208	-0.0348117	-0.0347339	-0.0346766	-0.0346239	-0.0342996	-0.0340153	-0.0338297	-0.0338072	-0.0337893	-0.0335925	-0.0331607	-0.0331585	-0.0330903	-0.0330533	-0.0329022	-0.0322829	-0.0322445	-0.032191	-0.032034	-0.0318045	-0.0317708	-0.0317303	-0.0314225	-0.0311192	-0.0310979	-0.0310477	-0.0308677	-0.0307737	-0.0306664	-0.0306405	-0.0305087	-0.0304796	-0.0304307	-0.0302523	-0.0300174	-0.0299003	-0.0296816
-0.0387502	-0.038665	-0.0385997	-0.0385941	-0.0379067	-0.0374409	-0.0368992	-0.0367752	-0.0366866	-0.0366268	-0.0363501	-0.0358637	-0.035729	-0.0348197	-0.034742	-0.0346846	-0.0346319	-0.0343075	-0.0340231	-0.0338375	-0.033815	-0.0337971	-0.0336003	-0.0331683	-0.0331661	-0.0330979	-0.0330609	-0.0329098	-0.0322904	-0.0322519	-0.0321984	-0.0320414	-0.0318119	-0.0317781	-0.0317377	-0.0314297	-0.0311264	-0.031105	-0.0310549	-0.0308748	-0.0307808	-0.0306735	-0.0306476	-0.0305157	-0.0304866	-0.0304377	-0.0302593	-0.0300244	-0.0299072	-0.0296885
-0.0387642	-0.0386791	-0.0386136	-0.0386081	-0.0379204	-0.0374545	-0.0369126	-0.0367885	-0.0366999	-0.0366401	-0.0363633	-0.0358767	-0.035742	-0.0348323	-0.0347546	-0.0346972	-0.0346444	-0.0343199	-0.0340355	-0.0338498	-0.0338272	-0.0338093	-0.0336125	-0.0331803	-0.0331782	-0.0331099	-0.0330729	-0.0329218	-0.0323021	-0.0322636	-0.0322101	-0.032053	-0.0318234	-0.0317896	-0.0317492	-0.0314411	-0.0311377	-0.0311163	-0.0310662	-0.030886	-0.0307919	-0.0306846	-0.0306587	-0.0305268	-0.0304977	-0.0304488	-0.0302702	-0.0300352	-0.029918	-0.0296993
-0.038772	-0.0386868	-0.0386214	-0.0386158	-0.0379281	-0.037462	-0.03692	-0.0367959	-0.0367072	-0.0366475	-0.0363706	-0.0358839	-0.0357491	-0.0348393	-0.0347616	-0.0347042	-0.0346514	-0.0343268	-0.0340423	-0.0338566	-0.033834	-0.0338161	-0.0336192	-0.033187	-0.0331848	-0.0331166	-0.0330796	-0.0329284	-0.0323085	-0.0322701	-0.0322166	-0.0320595	-0.0318298	-0.031796	-0.0317556	-0.0314474	-0.0311439	-0.0311226	-0.0310724	-0.0308922	-0.0307981	-0.0306908	-0.0306649	-0.0305329	-0.0305038	-0.0304549	-0.0302763	-0.0300413	-0.029924	-0.0297052
-0.0387724	-0.0386872	-0.0386218	-0.0386162	-0.0379284	-0.0374624	-0.0369203	-0.0367963	-0.0367076	-0.0366478	-0.0363709	-0.0358843	-0.0357495	-0.0348397	-0.0347619	-0.0347045	-0.0346517	-0.0343271	-0.0340426	-0.0338569	-0.0338343	-0.0338164	-0.0336196	-0.0331873	-0.0331851	-0.0331169	-0.0330799	-0.0329287	-0.0323089	-0.0322704	-0.0322169	-0.0320598	-0.0318301	-0.0317963	-0.0317559	-0.0314477	-0.0311442	-0.0311229	-0.0310727	-0.0308925	-0.0307984	-0.0306911	-0.0306652	-0.0305332	-0.0305041	-0.0304552	-0.0302766	-0.0300416	-0.0299243	-0.0297055
-0.0388172	-0.0387319	-0.0386664	-0.0386608	-0.0379723	-0.0375057	-0.036963	-0.0368388	-0.03675	-0.0366902	-0.036413	-0.0359258	-0.0357908	-0.03488	-0.0348021	-0.0347446	-0.0346918	-0.0343668	-0.034082	-0.0338961	-0.0338735	-0.0338555	-0.0336584	-0.0332257	-0.0332235	-0.0331552	-0.0331181	-0.0329668	-0.0323462	-0.0323077	-0.0322541	-0.0320969	-0.0318669	-0.0318331	-0.0317926	-0.0314841	-0.0311802	-0.0311589	-0.0311086	-0.0309282	-0.030834	-0.0307266	-0.0307006	-0.0305685	-0.0305394	-0.0304904	-0.0303116	-0.0300763	-0.0299589	-0.0297399
-0.0388756	-0.0387902	-0.0387246	-0.038719	-0.0380294	-0.0375621	-0.0370186	-0.0368942	-0.0368053	-0.0367454	-0.0364677	-0.0359798	-0.0358446	-0.0349324	-0.0348544	-0.0347969	-0.034744	-0.0344185	-0.0341332	-0.033947	-0.0339244	-0.0339064	-0.033709	-0.0332757	-0.0332735	-0.0332051	-0.033168	-0.0330164	-0.0323949	-0.0323563	-0.0323026	-0.0321451	-0.0319148	-0.031881	-0.0318404	-0.0315314	-0.0312271	-0.0312057	-0.0311554	-0.0309747	-0.0308804	-0.0307728	-0.0307468	-0.0306145	-0.0305853	-0.0305363	-0.0303572	-0.0301215	-0.030004	-0.0297846
-0.0388894	-0.038804	-0.0387384	-0.0387328	-0.0380429	-0.0375755	-0.0370318	-0.0369074	-0.0368184	-0.0367585	-0.0364807	-0.0359926	-0.0358574	-0.0349449	-0.0348668	-0.0348093	-0.0347564	-0.0344308	-0.0341454	-0.0339591	-0.0339365	-0.0339185	-0.0337211	-0.0332875	-0.0332853	-0.0332169	-0.0331798	-0.0330281	-0.0324064	-0.0323678	-0.0323142	-0.0321566	-0.0319262	-0.0318923	-0.0318517	-0.0315427	-0.0312383	-0.0312168	-0.0311665	-0.0309858	-0.0308914	-0.0307838	-0.0307578	-0.0306254	-0.0305962	-0.0305471	-0.030368	-0.0301323	-0.0300147	-0.0297952
-0.0388959	-0.0388104	-0.0387448	-0.0387392	-0.0380492	-0.0375817	-0.0370379	-0.0369135	-0.0368245	-0.0367646	-0.0364868	-0.0359986	-0.0358634	-0.0349507	-0.0348726	-0.034815	-0.0347621	-0.0344365	-0.0341511	-0.0339648	-0.0339421	-0.0339241	-0.0337266	-0.033293	-0.0332908	-0.0332224	-0.0331853	-0.0330336	-0.0324118	-0.0323732	-0.0323195	-0.0321619	-0.0319315	-0.0318976	-0.031857	-0.0315479	-0.0312434	-0.031222	-0.0311717	-0.0309909	-0.0308965	-0.0307889	-0.0307628	-0.0306305	-0.0306013	-0.0305522	-0.030373	-0.0301373	-0.0300196	-0.0298001
-0.0389775	-0.0388918	-0.0388261	-0.0388204	-0.038129	-0.0376605	-0.0371156	-0.0369909	-0.0369017	-0.0368417	-0.0365633	-0.0360741	-0.0359386	-0.035024	-0.0349458	-0.034888	-0.034835	-0.0345087	-0.0342227	-0.034036	-0.0340133	-0.0339953	-0.0337974	-0.0333629	-0.0333607	-0.0332921	-0.0332549	-0.0331029	-0.0324797	-0.0324411	-0.0323873	-0.0322294	-0.0319985	-0.0319645	-0.0319238	-0.0316141	-0.031309	-0.0312875	-0.0312371	-0.0310559	-0.0309613	-0.0308534	-0.0308274	-0.0306947	-0.0306655	-0.0306163	-0.0304367	-0.0302005	-0.0300826	-0.0298626
-0.0390029	-0.0389173	-0.0388515	-0.0388458	-0.038154	-0.0376851	-0.0371399	-0.0370151	-0.0369259	-0.0368658	-0.0365872	-0.0360977	-0.0359621	-0.0350469	-0.0349686	-0.0349109	-0.0348578	-0.0345313	-0.0342451	-0.0340583	-0.0340356	-0.0340175	-0.0338195	-0.0333847	-0.0333825	-0.0333139	-0.0332766	-0.0331245	-0.032501	-0.0324623	-0.0324085	-0.0322504	-0.0320194	-0.0319854	-0.0319447	-0.0316347	-0.0313294	-0.031308	-0.0312575	-0.0310762	-0.0309816	-0.0308736	-0.0308475	-0.0307148	-0.0306855	-0.0306363	-0.0304566	-0.0302202	-0.0301023	-0.0298822
-0.0390108	-0.0389251	-0.0388593	-0.0388536	-0.0381616	-0.0376927	-0.0371474	-0.0370225	-0.0369333	-0.0368732	-0.0365946	-0.0361049	-0.0359693	-0.0350539	-0.0349756	-0.0349179	-0.0348648	-0.0345382	-0.0342519	-0.0340651	-0.0340424	-0.0340244	-0.0338263	-0.0333914	-0.0333892	-0.0333205	-0.0332833	-0.0331312	-0.0325075	-0.0324688	-0.032415	-0.0322569	-0.0320258	-0.0319918	-0.0319511	-0.0316411	-0.0313357	-0.0313142	-0.0312638	-0.0310825	-0.0309878	-0.0308798	-0.0308537	-0.0307209	-0.0306917	-0.0306425	-0.0304628	-0.0302263	-0.0301083	-0.0298882
-0.0390166	-0.0389309	-0.038865	-0.0388594	-0.0381673	-0.0376983	-0.0371529	-0.037028	-0.0369388	-0.0368787	-0.0366	-0.0361103	-0.0359746	-0.0350591	-0.0349808	-0.0349231	-0.03487	-0.0345433	-0.034257	-0.0340702	-0.0340474	-0.0340294	-0.0338313	-0.0333963	-0.0333941	-0.0333255	-0.0332882	-0.0331361	-0.0325123	-0.0324736	-0.0324198	-0.0322617	-0.0320306	-0.0319966	-0.0319559	-0.0316458	-0.0313404	-0.0313189	-0.0312684	-0.0310871	-0.0309924	-0.0308844	-0.0308583	-0.0307255	-0.0306962	-0.030647	-0.0304673	-0.0302308	-0.0301128	-0.0298926
-0.0390282	-0.0389425	-0.0388766	-0.038871	-0.0381787	-0.0377095	-0.0371639	-0.0370391	-0.0369498	-0.0368896	-0.0366109	-0.036121	-0.0359854	-0.0350696	-0.0349912	-0.0349335	-0.0348804	-0.0345536	-0.0342672	-0.0340803	-0.0340576	-0.0340396	-0.0338414	-0.0334063	-0.0334041	-0.0333354	-0.0332982	-0.033146	-0.032522	-0.0324833	-0.0324295	-0.0322713	-0.0320401	-0.0320061	-0.0319654	-0.0316552	-0.0313497	-0.0313282	-0.0312777	-0.0310963	-0.0310016	-0.0308936	-0.0308675	-0.0307347	-0.0307054	-0.0306561	-0.0304764	-0.0302398	-0.0301218	-0.0299015
-0.0390519	-0.0389661	-0.0389002	-0.0388946	-0.0382019	-0.0377324	-0.0371865	-0.0370615	-0.0369722	-0.036912	-0.0366331	-0.036143	-0.0360072	-0.0350908	-0.0350125	-0.0349547	-0.0349015	-0.0345746	-0.034288	-0.034101	-0.0340783	-0.0340602	-0.0338619	-0.0334266	-0.0334244	-0.0333557	-0.0333184	-0.0331661	-0.0325418	-0.032503	-0.0324491	-0.0322909	-0.0320596	-0.0320255	-0.0319848	-0.0316744	-0.0313688	-0.0313472	-0.0312967	-0.0311152	-0.0310204	-0.0309123	-0.0308862	-0.0307533	-0.030724	-0.0306747	-0.0304949	-0.0302581	-0.03014	-0.0299197
-0.0390635	-0.0389777	-0.0389117	-0.0389061	-0.0382132	-0.0377436	-0.0371975	-0.0370725	-0.0369832	-0.036923	-0.036644	-0.0361537	-0.0360179	-0.0351012	-0.0350229	-0.034965	-0.0349119	-0.0345849	-0.0342982	-0.0341111	-0.0340884	-0.0340703	-0.033872	-0.0334365	-0.0334343	-0.0333655	-0.0333282	-0.0331759	-0.0325514	-0.0325127	-0.0324588	-0.0323005	-0.0320691	-0.032035	-0.0319943	-0.0316838	-0.0313781	-0.0313565	-0.031306	-0.0311244	-0.0310296	-0.0309215	-0.0308954	-0.0307624	-0.0307331	-0.0306838	-0.0305039	-0.0302671	-0.030149	-0.0299285
-0.0391222	-0.0390363	-0.0389703	-0.0389646	-0.0382707	-0.0378004	-0.0372535	-0.0371283	-0.0370388	-0.0369785	-0.0366991	-0.0362081	-0.0360721	-0.0351541	-0.0350756	-0.0350176	-0.0349644	-0.0346369	-0.0343498	-0.0341624	-0.0341396	-0.0341216	-0.0339229	-0.0334868	-0.0334846	-0.0334157	-0.0333784	-0.0332258	-0.0326004	-0.0325616	-0.0325076	-0.0323491	-0.0321173	-0.0320832	-0.0320424	-0.0317315	-0.0314253	-0.0314037	-0.0313531	-0.0311713	-0.0310763	-0.030968	-0.0309419	-0.0308087	-0.0307794	-0.03073	-0.0305498	-0.0303126	-0.0301943	-0.0299736
-0.0391305	-0.0390446	-0.0389785	-0.0389729	-0.0382788	-0.0378084	-0.0372614	-0.0371362	-0.0370467	-0.0369864	-0.0367069	-0.0362158	-0.0360797	-0.0351615	-0.035083	-0.0350251	-0.0349718	-0.0346442	-0.0343571	-0.0341697	-0.0341469	-0.0341288	-0.0339301	-0.0334939	-0.0334917	-0.0334228	-0.0333855	-0.0332329	-0.0326073	-0.0325685	-0.0325145	-0.0323559	-0.0321241	-0.03209	-0.0320492	-0.0317382	-0.0314319	-0.0314104	-0.0313598	-0.0311779	-0.0310829	-0.0309746	-0.0309484	-0.0308153	-0.0307859	-0.0307365	-0.0305563	-0.0303191	-0.0302007	-0.0299799
-0.0391453	-0.0390593	-0.0389932	-0.0389876	-0.0382932	-0.0378227	-0.0372754	-0.0371502	-0.0370606	-0.0370003	-0.0367207	-0.0362294	-0.0360933	-0.0351747	-0.0350962	-0.0350383	-0.034985	-0.0346573	-0.03437	-0.0341825	-0.0341597	-0.0341417	-0.0339429	-0.0335065	-0.0335043	-0.0334354	-0.033398	-0.0332454	-0.0326196	-0.0325807	-0.0325267	-0.0323681	-0.0321362	-0.0321021	-0.0320613	-0.0317502	-0.0314438	-0.0314222	-0.0313716	-0.0311896	-0.0310946	-0.0309863	-0.0309601	-0.0308269	-0.0307975	-0.0307481	-0.0305678	-0.0303305	-0.0302121	-0.0299912
-0.0391492	-0.0390632	-0.0389972	-0.0389915	-0.0382971	-0.0378265	-0.0372792	-0.0371539	-0.0370644	-0.0370041	-0.0367244	-0.0362331	-0.036097	-0.0351783	-0.0350998	-0.0350418	-0.0349886	-0.0346608	-0.0343735	-0.034186	-0.0341632	-0.0341451	-0.0339463	-0.0335099	-0.0335077	-0.0334388	-0.0334014	-0.0332488	-0.0326229	-0.0325841	-0.03253	-0.0323714	-0.0321395	-0.0321054	-0.0320645	-0.0317534	-0.031447	-0.0314254	-0.0313747	-0.0311928	-0.0310978	-0.0309894	-0.0309632	-0.03083	-0.0308006	-0.0307512	-0.0305709	-0.0303336	-0.0302152	-0.0299943
-0.0391636	-0.0390776	-0.0390115	-0.0390058	-0.0383112	-0.0378404	-0.0372929	-0.0371676	-0.037078	-0.0370176	-0.0367379	-0.0362464	-0.0361102	-0.0351912	-0.0351127	-0.0350547	-0.0350014	-0.0346735	-0.0343861	-0.0341986	-0.0341758	-0.0341577	-0.0339588	-0.0335222	-0.03352	-0.0334511	-0.0334137	-0.033261	-0.0326349	-0.032596	-0.032542	-0.0323833	-0.0321513	-0.0321172	-0.0320763	-0.0317651	-0.0314585	-0.0314369	-0.0313863	-0.0312042	-0.0311092	-0.0310008	-0.0309746	-0.0308413	-0.0308119	-0.0307625	-0.0305821	-0.0303447	-0.0302263	-0.0300053
-0.0391669	-0.0390809	-0.0390148	-0.0390091	-0.0383144	-0.0378436	-0.037296	-0.0371707	-0.0370811	-0.0370208	-0.036741	-0.0362494	-0.0361133	-0.0351942	-0.0351156	-0.0350576	-0.0350044	-0.0346765	-0.034389	-0.0342014	-0.0341786	-0.0341605	-0.0339617	-0.033525	-0.0335228	-0.0334539	-0.0334165	-0.0332638	-0.0326376	-0.0325988	-0.0325447	-0.032386	-0.032154	-0.0321199	-0.032079	-0.0317677	-0.0314612	-0.0314396	-0.0313889	-0.0312069	-0.0311118	-0.0310034	-0.0309772	-0.0308439	-0.0308145	-0.0307651	-0.0305847	-0.0303473	-0.0302288	-0.0300078
-0.0391968	-0.0391107	-0.0390445	-0.0390389	-0.0383436	-0.0378724	-0.0373245	-0.037199	-0.0371094	-0.037049	-0.036769	-0.0362771	-0.0361408	-0.035221	-0.0351424	-0.0350844	-0.035031	-0.0347029	-0.0344152	-0.0342275	-0.0342047	-0.0341866	-0.0339876	-0.0335506	-0.0335484	-0.0334794	-0.033442	-0.0332891	-0.0326625	-0.0326236	-0.0325695	-0.0324107	-0.0321785	-0.0321444	-0.0321035	-0.031792	-0.0314851	-0.0314635	-0.0314128	-0.0312307	-0.0311355	-0.031027	-0.0310008	-0.0308674	-0.030838	-0.0307886	-0.030608	-0.0303704	-0.0302519	-0.0300307
-0.0391991	-0.039113	-0.0390469	-0.0390412	-0.0383459	-0.0378747	-0.0373267	-0.0372013	-0.0371116	-0.0370512	-0.0367712	-0.0362793	-0.036143	-0.0352232	-0.0351445	-0.0350865	-0.0350332	-0.034705	-0.0344173	-0.0342296	-0.0342068	-0.0341887	-0.0339896	-0.0335526	-0.0335504	-0.0334814	-0.033444	-0.0332912	-0.0326645	-0.0326256	-0.0325715	-0.0324127	-0.0321805	-0.0321463	-0.0321054	-0.0317939	-0.0314871	-0.0314654	-0.0314147	-0.0312325	-0.0311374	-0.0310289	-0.0310027	-0.0308693	-0.0308399	-0.0307904	-0.0306099	-0.0303722	-0.0302537	-0.0300325
-0.0392167	-0.0391306	-0.0390644	-0.0390588	-0.0383631	-0.0378917	-0.0373435	-0.037218	-0.0371283	-0.0370679	-0.0367878	-0.0362955	-0.0361592	-0.035239	-0.0351603	-0.0351022	-0.0350489	-0.0347206	-0.0344328	-0.034245	-0.0342221	-0.034204	-0.0340049	-0.0335677	-0.0335655	-0.0334965	-0.033459	-0.0333061	-0.0326791	-0.0326402	-0.0325861	-0.0324272	-0.0321949	-0.0321607	-0.0321198	-0.0318081	-0.0315012	-0.0314796	-0.0314288	-0.0312466	-0.0311514	-0.0310428	-0.0310166	-0.0308831	-0.0308537	-0.0308042	-0.0306236	-0.0303859	-0.0302673	-0.030046
-0.0392331	-0.0391469	-0.0390807	-0.039075	-0.0383791	-0.0379075	-0.037359	-0.0372335	-0.0371437	-0.0370833	-0.0368031	-0.0363106	-0.0361743	-0.0352536	-0.0351749	-0.0351168	-0.0350635	-0.034735	-0.0344471	-0.0342592	-0.0342364	-0.0342182	-0.034019	-0.0335817	-0.0335794	-0.0335104	-0.0334729	-0.03332	-0.0326927	-0.0326538	-0.0325997	-0.0324407	-0.0322083	-0.0321741	-0.0321332	-0.0318214	-0.0315143	-0.0314927	-0.0314419	-0.0312596	-0.0311644	-0.0310558	-0.0310295	-0.030896	-0.0308666	-0.030817	-0.0306363	-0.0303985	-0.0302799	-0.0300585
-0.0392531	-0.0391669	-0.0391007	-0.039095	-0.0383987	-0.0379269	-0.0373781	-0.0372525	-0.0371627	-0.0371022	-0.0368219	-0.0363292	-0.0361928	-0.0352717	-0.0351929	-0.0351348	-0.0350814	-0.0347528	-0.0344647	-0.0342767	-0.0342539	-0.0342357	-0.0340364	-0.0335988	-0.0335966	-0.0335275	-0.0334901	-0.033337	-0.0327095	-0.0326705	-0.0326164	-0.0324573	-0.0322248	-0.0321906	-0.0321496	-0.0318377	-0.0315304	-0.0315088	-0.031458	-0.0312756	-0.0311803	-0.0310716	-0.0310454	-0.0309118	-0.0308823	-0.0308328	-0.030652	-0.0304141	-0.0302953	-0.0300738
-0.0392619	-0.0391756	-0.0391094	-0.0391037	-0.0384073	-0.0379353	-0.0373864	-0.0372608	-0.037171	-0.0371105	-0.0368301	-0.0363373	-0.0362008	-0.0352795	-0.0352007	-0.0351426	-0.0350892	-0.0347605	-0.0344724	-0.0342843	-0.0342615	-0.0342433	-0.034044	-0.0336063	-0.0336041	-0.033535	-0.0334975	-0.0333444	-0.0327167	-0.0326778	-0.0326236	-0.0324645	-0.032232	-0.0321977	-0.0321568	-0.0318447	-0.0315374	-0.0315158	-0.031465	-0.0312825	-0.0311872	-0.0310786	-0.0310523	-0.0309187	-0.0308892	-0.0308397	-0.0306588	-0.0304208	-0.0303021	-0.0300805
-0.0393102	-0.0392239	-0.0391575	-0.0391519	-0.0384546	-0.037982	-0.0374325	-0.0373067	-0.0372168	-0.0371562	-0.0368754	-0.0363821	-0.0362454	-0.035323	-0.0352441	-0.0351859	-0.0351324	-0.0348033	-0.0345148	-0.0343266	-0.0343037	-0.0342855	-0.0340859	-0.0336477	-0.0336455	-0.0335763	-0.0335388	-0.0333855	-0.032757	-0.032718	-0.0326638	-0.0325045	-0.0322717	-0.0322374	-0.0321964	-0.031884	-0.0315763	-0.0315546	-0.0315038	-0.031321	-0.0312256	-0.0311168	-0.0310905	-0.0309567	-0.0309273	-0.0308776	-0.0306966	-0.0304583	-0.0303394	-0.0301176
-0.0393418	-0.0392554	-0.039189	-0.0391833	-0.0384855	-0.0380126	-0.0374626	-0.0373367	-0.0372467	-0.0371861	-0.0369051	-0.0364113	-0.0362745	-0.0353514	-0.0352724	-0.0352142	-0.0351607	-0.0348313	-0.0345426	-0.0343542	-0.0343313	-0.0343131	-0.0341133	-0.0336747	-0.0336725	-0.0336033	-0.0335657	-0.0334123	-0.0327834	-0.0327443	-0.03269	-0.0325306	-0.0322976	-0.0322633	-0.0322222	-0.0319096	-0.0316016	-0.03158	-0.0315291	-0.0313462	-0.0312507	-0.0311418	-0.0311155	-0.0309816	-0.0309521	-0.0309025	-0.0307213	-0.0304828	-0.0303638	-0.0301418
-0.0393492	-0.0392627	-0.0391963	-0.0391906	-0.0384927	-0.0380197	-0.0374696	-0.0373437	-0.0372537	-0.037193	-0.036912	-0.0364181	-0.0362813	-0.035358	-0.035279	-0.0352208	-0.0351672	-0.0348378	-0.034549	-0.0343606	-0.0343377	-0.0343195	-0.0341197	-0.033681	-0.0336788	-0.0336096	-0.033572	-0.0334186	-0.0327895	-0.0327505	-0.0326962	-0.0325367	-0.0323036	-0.0322693	-0.0322283	-0.0319156	-0.0316075	-0.0315859	-0.031535	-0.0313521	-0.0312566	-0.0311477	-0.0311214	-0.0309874	-0.0309579	-0.0309082	-0.030727	-0.0304885	-0.0303695	-0.0301474
-0.0393599	-0.0392735	-0.0392071	-0.0392014	-0.0385032	-0.0380301	-0.0374798	-0.0373539	-0.0372639	-0.0372032	-0.0369221	-0.0364281	-0.0362912	-0.0353676	-0.0352887	-0.0352304	-0.0351769	-0.0348473	-0.0345585	-0.03437	-0.0343471	-0.0343289	-0.034129	-0.0336903	-0.033688	-0.0336188	-0.0335812	-0.0334277	-0.0327985	-0.0327594	-0.0327051	-0.0325456	-0.0323125	-0.0322782	-0.0322371	-0.0319243	-0.0316162	-0.0315945	-0.0315436	-0.0313606	-0.0312651	-0.0311562	-0.0311299	-0.0309959	-0.0309664	-0.0309167	-0.0307354	-0.0304968	-0.0303778	-0.0301557
-0.0393688	-0.0392823	-0.0392159	-0.0392102	-0.0385118	-0.0380386	-0.0374882	-0.0373623	-0.0372722	-0.0372116	-0.0369304	-0.0364363	-0.0362994	-0.0353756	-0.0352966	-0.0352383	-0.0351848	-0.0348552	-0.0345663	-0.0343777	-0.0343548	-0.0343366	-0.0341367	-0.0336978	-0.0336956	-0.0336263	-0.0335887	-0.0334352	-0.0328058	-0.0327668	-0.0327125	-0.0325529	-0.0323197	-0.0322854	-0.0322443	-0.0319315	-0.0316233	-0.0316016	-0.0315507	-0.0313677	-0.0312722	-0.0311632	-0.0311369	-0.0310029	-0.0309733	-0.0309237	-0.0307423	-0.0305037	-0.0303846	-0.0301625
-0.0393713	-0.0392848	-0.0392184	-0.0392127	-0.0385143	-0.0380411	-0.0374907	-0.0373647	-0.0372746	-0.0372139	-0.0369327	-0.0364386	-0.0363017	-0.0353779	-0.0352989	-0.0352406	-0.035187	-0.0348574	-0.0345685	-0.0343799	-0.034357	-0.0343388	-0.0341389	-0.0337	-0.0336978	-0.0336285	-0.0335909	-0.0334374	-0.0328079	-0.0327689	-0.0327145	-0.032555	-0.0323218	-0.0322875	-0.0322464	-0.0319335	-0.0316253	-0.0316036	-0.0315527	-0.0313697	-0.0312742	-0.0311652	-0.0311389	-0.0310049	-0.0309753	-0.0309256	-0.0307443	-0.0305056	-0.0303866	-0.0301644
-0.0393785	-0.039292	-0.0392256	-0.0392199	-0.0385214	-0.0380481	-0.0374976	-0.0373716	-0.0372815	-0.0372208	-0.0369395	-0.0364453	-0.0363084	-0.0353844	-0.0353054	-0.0352471	-0.0351935	-0.0348638	-0.0345748	-0.0343862	-0.0343633	-0.0343451	-0.0341452	-0.0337062	-0.033704	-0.0336347	-0.0335971	-0.0334435	-0.032814	-0.0327749	-0.0327206	-0.032561	-0.0323278	-0.0322934	-0.0322523	-0.0319394	-0.0316312	-0.0316095	-0.0315585	-0.0313755	-0.0312799	-0.0311709	-0.0311446	-0.0310106	-0.030981	-0.0309313	-0.0307499	-0.0305112	-0.0303921	-0.0301699
-0.0393796	-0.0392931	-0.0392266	-0.0392209	-0.0385224	-0.0380491	-0.0374985	-0.0373725	-0.0372825	-0.0372218	-0.0369405	-0.0364463	-0.0363094	-0.0353853	-0.0353063	-0.035248	-0.0351944	-0.0348647	-0.0345758	-0.0343871	-0.0343642	-0.034346	-0.0341461	-0.0337071	-0.0337049	-0.0336356	-0.033598	-0.0334444	-0.0328148	-0.0327758	-0.0327214	-0.0325619	-0.0323286	-0.0322943	-0.0322532	-0.0319402	-0.031632	-0.0316103	-0.0315594	-0.0313763	-0.0312807	-0.0311717	-0.0311454	-0.0310114	-0.0309818	-0.0309321	-0.0307508	-0.030512	-0.0303929	-0.0301707
-0.0394171	-0.0393305	-0.039264	-0.0392583	-0.0385591	-0.0380853	-0.0375342	-0.0374081	-0.037318	-0.0372572	-0.0369757	-0.036481	-0.0363439	-0.035419	-0.0353399	-0.0352815	-0.0352279	-0.0348979	-0.0346087	-0.0344199	-0.0343969	-0.0343787	-0.0341786	-0.0337392	-0.0337369	-0.0336676	-0.0336299	-0.0334762	-0.0328461	-0.032807	-0.0327526	-0.0325929	-0.0323594	-0.032325	-0.0322839	-0.0319706	-0.0316621	-0.0316404	-0.0315894	-0.0314062	-0.0313105	-0.0312014	-0.0311751	-0.0310409	-0.0310113	-0.0309616	-0.03078	-0.0305411	-0.0304219	-0.0301995
-0.0394282	-0.0393416	-0.039275	-0.0392693	-0.0385699	-0.038096	-0.0375448	-0.0374186	-0.0373285	-0.0372677	-0.0369861	-0.0364912	-0.0363542	-0.035429	-0.0353498	-0.0352915	-0.0352378	-0.0349078	-0.0346184	-0.0344296	-0.0344066	-0.0343884	-0.0341882	-0.0337487	-0.0337464	-0.033677	-0.0336394	-0.0334857	-0.0328553	-0.0328162	-0.0327618	-0.032602	-0.0323685	-0.0323341	-0.032293	-0.0319796	-0.031671	-0.0316493	-0.0315983	-0.031415	-0.0313193	-0.0312102	-0.0311838	-0.0310496	-0.0310201	-0.0309703	-0.0307887	-0.0305497	-0.0304304	-0.0302079
-0.0394297	-0.0393431	-0.0392766	-0.0392709	-0.0385715	-0.0380975	-0.0375463	-0.0374201	-0.0373299	-0.0372691	-0.0369875	-0.0364926	-0.0363556	-0.0354303	-0.0353512	-0.0352928	-0.0352392	-0.0349091	-0.0346198	-0.0344309	-0.034408	-0.0343897	-0.0341895	-0.03375	-0.0337478	-0.0336784	-0.0336407	-0.033487	-0.0328566	-0.0328175	-0.0327631	-0.0326033	-0.0323697	-0.0323354	-0.0322942	-0.0319809	-0.0316722	-0.0316505	-0.0315995	-0.0314162	-0.0313206	-0.0312114	-0.0311851	-0.0310509	-0.0310213	-0.0309715	-0.0307899	-0.0305509	-0.0304316	-0.0302091
-0.0394529	-0.0393662	-0.0392996	-0.0392939	-0.0385941	-0.0381199	-0.0375683	-0.0374421	-0.0373519	-0.0372911	-0.0370093	-0.0365141	-0.0363769	-0.0354512	-0.035372	-0.0353136	-0.0352599	-0.0349296	-0.0346401	-0.0344512	-0.0344282	-0.03441	-0.0342096	-0.0337698	-0.0337676	-0.0336982	-0.0336605	-0.0335066	-0.0328759	-0.0328368	-0.0327823	-0.0326225	-0.0323888	-0.0323544	-0.0323132	-0.0319997	-0.0316909	-0.0316691	-0.0316181	-0.0314347	-0.031339	-0.0312298	-0.0312034	-0.0310691	-0.0310395	-0.0309897	-0.030808	-0.0305688	-0.0304495	-0.0302269
-0.0394747	-0.039388	-0.0393214	-0.0393157	-0.0386155	-0.038141	-0.0375891	-0.0374628	-0.0373725	-0.0373117	-0.0370297	-0.0365343	-0.0363971	-0.0354708	-0.0353916	-0.0353331	-0.0352794	-0.0349489	-0.0346593	-0.0344702	-0.0344472	-0.034429	-0.0342285	-0.0337885	-0.0337863	-0.0337168	-0.0336791	-0.0335252	-0.0328941	-0.0328549	-0.0328005	-0.0326405	-0.0324067	-0.0323723	-0.0323311	-0.0320174	-0.0317084	-0.0316866	-0.0316356	-0.0314521	-0.0313563	-0.031247	-0.0312206	-0.0310863	-0.0310567	-0.0310068	-0.030825	-0.0305857	-0.0304664	-0.0302436
-0.0395269	-0.0394401	-0.0393733	-0.0393676	-0.0386665	-0.0381914	-0.0376388	-0.0375123	-0.0374219	-0.037361	-0.0370787	-0.0365826	-0.0364452	-0.0355176	-0.0354383	-0.0353798	-0.035326	-0.0349951	-0.0347051	-0.0345158	-0.0344928	-0.0344745	-0.0342738	-0.0338331	-0.0338309	-0.0337614	-0.0337236	-0.0335695	-0.0329376	-0.0328984	-0.0328438	-0.0326837	-0.0324495	-0.0324151	-0.0323738	-0.0320597	-0.0317503	-0.0317285	-0.0316774	-0.0314937	-0.0313977	-0.0312883	-0.0312619	-0.0311274	-0.0310977	-0.0310478	-0.0308658	-0.0306262	-0.0305066	-0.0302836
-0.0395324	-0.0394455	-0.0393788	-0.0393731	-0.0386719	-0.0381967	-0.037644	-0.0375175	-0.0374271	-0.0373662	-0.0370838	-0.0365877	-0.0364502	-0.0355226	-0.0354433	-0.0353847	-0.035331	-0.035	-0.0347099	-0.0345206	-0.0344976	-0.0344793	-0.0342786	-0.0338379	-0.0338356	-0.0337661	-0.0337283	-0.0335742	-0.0329422	-0.0329029	-0.0328484	-0.0326882	-0.032454	-0.0324196	-0.0323783	-0.0320642	-0.0317547	-0.0317329	-0.0316818	-0.031498	-0.0314021	-0.0312927	-0.0312663	-0.0311317	-0.031102	-0.0310522	-0.0308701	-0.0306304	-0.0305109	-0.0302878
-0.0395375	-0.0394507	-0.039384	-0.0393783	-0.0386769	-0.0382017	-0.037649	-0.0375224	-0.037432	-0.0373711	-0.0370887	-0.0365925	-0.036455	-0.0355272	-0.0354479	-0.0353894	-0.0353356	-0.0350046	-0.0347144	-0.0345251	-0.0345021	-0.0344838	-0.034283	-0.0338423	-0.0338401	-0.0337705	-0.0337327	-0.0335786	-0.0329465	-0.0329073	-0.0328527	-0.0326925	-0.0324583	-0.0324238	-0.0323826	-0.0320684	-0.0317589	-0.0317371	-0.0316859	-0.0315022	-0.0314062	-0.0312968	-0.0312704	-0.0311358	-0.0311061	-0.0310562	-0.0308741	-0.0306344	-0.0305149	-0.0302918
-0.0395472	-0.0394603	-0.0393936	-0.0393879	-0.0386864	-0.038211	-0.0376581	-0.0375316	-0.0374411	-0.0373802	-0.0370977	-0.0366014	-0.0364639	-0.0355359	-0.0354565	-0.035398	-0.0353442	-0.0350131	-0.0347229	-0.0345335	-0.0345105	-0.0344922	-0.0342914	-0.0338505	-0.0338483	-0.0337787	-0.0337409	-0.0335867	-0.0329545	-0.0329153	-0.0328607	-0.0327005	-0.0324662	-0.0324317	-0.0323904	-0.0320762	-0.0317666	-0.0317448	-0.0316937	-0.0315098	-0.0314139	-0.0313044	-0.031278	-0.0311434	-0.0311137	-0.0310638	-0.0308816	-0.0306419	-0.0305223	-0.0302991
-0.0395505	-0.0394636	-0.0393968	-0.0393911	-0.0386896	-0.0382142	-0.0376613	-0.0375347	-0.0374442	-0.0373833	-0.0371008	-0.0366044	-0.0364669	-0.0355388	-0.0354595	-0.0354009	-0.0353471	-0.035016	-0.0347258	-0.0345364	-0.0345133	-0.0344951	-0.0342942	-0.0338533	-0.0338511	-0.0337815	-0.0337437	-0.0335895	-0.0329572	-0.032918	-0.0328634	-0.0327032	-0.0324689	-0.0324344	-0.0323931	-0.0320788	-0.0317692	-0.0317475	-0.0316963	-0.0315125	-0.0314165	-0.031307	-0.0312806	-0.0311459	-0.0311163	-0.0310664	-0.0308842	-0.0306444	-0.0305248	-0.0303017
-0.0395525	-0.0394656	-0.0393988	-0.0393931	-0.0386915	-0.0382161	-0.0376632	-0.0375366	-0.0374461	-0.0373852	-0.0371027	-0.0366063	-0.0364688	-0.0355407	-0.0354613	-0.0354027	-0.0353489	-0.0350178	-0.0347276	-0.0345381	-0.0345151	-0.0344968	-0.034296	-0.0338551	-0.0338528	-0.0337832	-0.0337455	-0.0335912	-0.0329589	-0.0329197	-0.0328651	-0.0327048	-0.0324705	-0.0324361	-0.0323948	-0.0320805	-0.0317709	-0.0317491	-0.0316979	-0.0315141	-0.0314181	-0.0313086	-0.0312822	-0.0311475	-0.0311179	-0.0310679	-0.0308858	-0.030646	-0.0305264	-0.0303032
-0.0395595	-0.0394726	-0.0394058	-0.0394001	-0.0386984	-0.0382229	-0.0376698	-0.0375432	-0.0374528	-0.0373918	-0.0371092	-0.0366127	-0.0364752	-0.0355469	-0.0354676	-0.035409	-0.0353552	-0.035024	-0.0347337	-0.0345442	-0.0345212	-0.0345029	-0.034302	-0.033861	-0.0338588	-0.0337892	-0.0337514	-0.0335972	-0.0329647	-0.0329255	-0.0328709	-0.0327106	-0.0324763	-0.0324418	-0.0324005	-0.0320861	-0.0317765	-0.0317547	-0.0317035	-0.0315196	-0.0314236	-0.0313141	-0.0312877	-0.031153	-0.0311233	-0.0310734	-0.0308912	-0.0306514	-0.0305318	-0.0303085
-0.0396218	-0.0395348	-0.0394679	-0.0394622	-0.0387594	-0.0382831	-0.0377292	-0.0376024	-0.0375118	-0.0374507	-0.0371677	-0.0366704	-0.0365327	-0.0356029	-0.0355235	-0.0354648	-0.0354109	-0.0350792	-0.0347884	-0.0345987	-0.0345756	-0.0345573	-0.0343561	-0.0339144	-0.0339122	-0.0338424	-0.0338046	-0.0336501	-0.0330167	-0.0329774	-0.0329227	-0.0327622	-0.0325274	-0.0324929	-0.0324516	-0.0321367	-0.0318266	-0.0318047	-0.0317535	-0.0315693	-0.0314731	-0.0313635	-0.031337	-0.0312021	-0.0311724	-0.0311224	-0.0309399	-0.0306997	-0.0305799	-0.0303563
-0.0396222	-0.0395352	-0.0394683	-0.0394626	-0.0387598	-0.0382835	-0.0377296	-0.0376028	-0.0375122	-0.0374511	-0.0371681	-0.0366708	-0.0365331	-0.0356033	-0.0355238	-0.0354652	-0.0354113	-0.0350796	-0.0347888	-0.034599	-0.034576	-0.0345577	-0.0343565	-0.0339148	-0.0339125	-0.0338428	-0.033805	-0.0336505	-0.033017	-0.0329777	-0.0329231	-0.0327625	-0.0325278	-0.0324933	-0.0324519	-0.032137	-0.0318269	-0.0318051	-0.0317538	-0.0315696	-0.0314735	-0.0313638	-0.0313373	-0.0312025	-0.0311727	-0.0311227	-0.0309402	-0.0307001	-0.0305802	-0.0303566
-0.0396304	-0.0395433	-0.0394764	-0.0394707	-0.0387677	-0.0382914	-0.0377373	-0.0376105	-0.0375199	-0.0374588	-0.0371758	-0.0366784	-0.0365406	-0.0356107	-0.0355311	-0.0354725	-0.0354185	-0.0350868	-0.0347959	-0.0346061	-0.0345831	-0.0345648	-0.0343635	-0.0339217	-0.0339195	-0.0338498	-0.0338119	-0.0336574	-0.0330238	-0.0329845	-0.0329298	-0.0327692	-0.0325345	-0.0324999	-0.0324586	-0.0321436	-0.0318334	-0.0318116	-0.0317603	-0.0315761	-0.0314799	-0.0313703	-0.0313438	-0.0312089	-0.0311791	-0.0311291	-0.0309466	-0.0307064	-0.0305865	-0.0303629
-0.0396321	-0.039545	-0.0394781	-0.0394724	-0.0387694	-0.038293	-0.0377389	-0.0376121	-0.0375215	-0.0374604	-0.0371773	-0.0366799	-0.0365421	-0.0356122	-0.0355326	-0.035474	-0.0354201	-0.0350883	-0.0347974	-0.0346076	-0.0345845	-0.0345662	-0.034365	-0.0339232	-0.0339209	-0.0338512	-0.0338134	-0.0336588	-0.0330252	-0.0329859	-0.0329312	-0.0327706	-0.0325359	-0.0325013	-0.03246	-0.032145	-0.0318348	-0.0318129	-0.0317617	-0.0315775	-0.0314813	-0.0313716	-0.0313451	-0.0312102	-0.0311805	-0.0311305	-0.0309479	-0.0307077	-0.0305878	-0.0303642
-0.0396363	-0.0395492	-0.0394823	-0.0394766	-0.0387736	-0.0382971	-0.037743	-0.0376162	-0.0375255	-0.0374644	-0.0371813	-0.0366839	-0.0365461	-0.035616	-0.0355365	-0.0354778	-0.0354238	-0.035092	-0.0348012	-0.0346113	-0.0345882	-0.0345699	-0.0343687	-0.0339268	-0.0339246	-0.0338548	-0.033817	-0.0336624	-0.0330288	-0.0329894	-0.0329347	-0.0327742	-0.0325394	-0.0325048	-0.0324634	-0.0321485	-0.0318382	-0.0318164	-0.0317651	-0.0315809	-0.0314847	-0.031375	-0.0313485	-0.0312135	-0.0311838	-0.0311338	-0.0309512	-0.030711	-0.0305911	-0.0303674
-0.0396401	-0.039553	-0.0394861	-0.0394804	-0.0387772	-0.0383007	-0.0377466	-0.0376197	-0.0375291	-0.037468	-0.0371849	-0.0366873	-0.0365495	-0.0356194	-0.0355398	-0.0354811	-0.0354272	-0.0350954	-0.0348045	-0.0346146	-0.0345915	-0.0345732	-0.0343719	-0.03393	-0.0339278	-0.033858	-0.0338202	-0.0336656	-0.0330319	-0.0329926	-0.0329379	-0.0327773	-0.0325424	-0.0325079	-0.0324665	-0.0321515	-0.0318412	-0.0318194	-0.0317681	-0.0315838	-0.0314876	-0.0313779	-0.0313514	-0.0312165	-0.0311868	-0.0311367	-0.0309542	-0.0307139	-0.030594	-0.0303703
-0.0396424	-0.0395554	-0.0394885	-0.0394827	-0.0387796	-0.038303	-0.0377488	-0.037622	-0.0375313	-0.0374702	-0.0371871	-0.0366895	-0.0365517	-0.0356215	-0.035542	-0.0354833	-0.0354293	-0.0350975	-0.0348065	-0.0346167	-0.0345936	-0.0345753	-0.034374	-0.0339321	-0.0339298	-0.0338601	-0.0338222	-0.0336676	-0.0330339	-0.0329946	-0.0329399	-0.0327792	-0.0325444	-0.0325098	-0.0324685	-0.0321534	-0.0318431	-0.0318213	-0.03177	-0.0315857	-0.0314895	-0.0313798	-0.0313533	-0.0312184	-0.0311886	-0.0311386	-0.030956	-0.0307157	-0.0305958	-0.0303721
-0.039643	-0.0395559	-0.039489	-0.0394833	-0.0387801	-0.0383036	-0.0377494	-0.0376225	-0.0375319	-0.0374708	-0.0371876	-0.0366901	-0.0365523	-0.035622	-0.0355425	-0.0354838	-0.0354298	-0.035098	-0.0348071	-0.0346172	-0.0345941	-0.0345758	-0.0343745	-0.0339326	-0.0339303	-0.0338606	-0.0338227	-0.0336681	-0.0330344	-0.032995	-0.0329403	-0.0327797	-0.0325449	-0.0325103	-0.0324689	-0.0321539	-0.0318436	-0.0318217	-0.0317705	-0.0315862	-0.03149	-0.0313803	-0.0313538	-0.0312188	-0.0311891	-0.0311391	-0.0309565	-0.0307162	-0.0305963	-0.0303726
-0.0396617	-0.0395745	-0.0395076	-0.0395019	-0.0387984	-0.0383216	-0.0377671	-0.0376402	-0.0375495	-0.0374884	-0.0372051	-0.0367073	-0.0365694	-0.0356388	-0.0355592	-0.0355005	-0.0354465	-0.0351145	-0.0348234	-0.0346335	-0.0346104	-0.034592	-0.0343907	-0.0339485	-0.0339463	-0.0338765	-0.0338386	-0.033684	-0.0330499	-0.0330105	-0.0329558	-0.0327951	-0.0325602	-0.0325256	-0.0324842	-0.032169	-0.0318586	-0.0318367	-0.0317854	-0.031601	-0.0315048	-0.031395	-0.0313685	-0.0312335	-0.0312038	-0.0311537	-0.030971	-0.0307306	-0.0306106	-0.0303868
-0.0396803	-0.0395931	-0.0395261	-0.0395204	-0.0388166	-0.0383396	-0.0377849	-0.0376579	-0.0375671	-0.037506	-0.0372226	-0.0367245	-0.0365866	-0.0356555	-0.0355759	-0.0355171	-0.0354631	-0.0351309	-0.0348398	-0.0346497	-0.0346266	-0.0346083	-0.0344068	-0.0339644	-0.0339622	-0.0338924	-0.0338545	-0.0336998	-0.0330654	-0.033026	-0.0329713	-0.0328105	-0.0325754	-0.0325409	-0.0324994	-0.0321841	-0.0318735	-0.0318516	-0.0318003	-0.0316159	-0.0315196	-0.0314098	-0.0313832	-0.0312482	-0.0312184	-0.0311683	-0.0309855	-0.030745	-0.030625	-0.0304011
-0.0397047	-0.0396175	-0.0395505	-0.0395448	-0.0388405	-0.0383632	-0.0378082	-0.0376811	-0.0375903	-0.0375291	-0.0372455	-0.0367472	-0.0366092	-0.0356775	-0.0355978	-0.035539	-0.035485	-0.0351526	-0.0348612	-0.0346711	-0.034648	-0.0346296	-0.034428	-0.0339854	-0.0339831	-0.0339133	-0.0338754	-0.0337205	-0.0330858	-0.0330464	-0.0329916	-0.0328307	-0.0325955	-0.0325609	-0.0325195	-0.032204	-0.0318932	-0.0318713	-0.0318199	-0.0316354	-0.031539	-0.0314291	-0.0314026	-0.0312674	-0.0312376	-0.0311875	-0.0310047	-0.030764	-0.0306439	-0.0304198
-0.0397266	-0.0396393	-0.0395723	-0.0395665	-0.0388619	-0.0383843	-0.037829	-0.0377019	-0.037611	-0.0375498	-0.037266	-0.0367674	-0.0366293	-0.0356971	-0.0356174	-0.0355586	-0.0355045	-0.035172	-0.0348804	-0.0346902	-0.034667	-0.0346487	-0.034447	-0.0340041	-0.0340019	-0.0339319	-0.033894	-0.0337391	-0.033104	-0.0330646	-0.0330098	-0.0328488	-0.0326135	-0.0325789	-0.0325374	-0.0322217	-0.0319107	-0.0318888	-0.0318374	-0.0316528	-0.0315564	-0.0314464	-0.0314199	-0.0312846	-0.0312548	-0.0312047	-0.0310217	-0.0307809	-0.0306608	-0.0304366
-0.0397298	-0.0396425	-0.0395755	-0.0395697	-0.038865	-0.0383874	-0.037832	-0.0377049	-0.037614	-0.0375528	-0.037269	-0.0367704	-0.0366323	-0.0357	-0.0356203	-0.0355615	-0.0355074	-0.0351748	-0.0348832	-0.034693	-0.0346698	-0.0346515	-0.0344497	-0.0340068	-0.0340046	-0.0339347	-0.0338968	-0.0337418	-0.0331067	-0.0330673	-0.0330124	-0.0328515	-0.0326161	-0.0325815	-0.03254	-0.0322243	-0.0319133	-0.0318914	-0.03184	-0.0316553	-0.0315589	-0.031449	-0.0314224	-0.0312872	-0.0312574	-0.0312072	-0.0310242	-0.0307834	-0.0306632	-0.030439
-0.0397375	-0.0396502	-0.0395832	-0.0395774	-0.0388726	-0.0383949	-0.0378394	-0.0377122	-0.0376213	-0.0375601	-0.0372763	-0.0367775	-0.0366394	-0.0357069	-0.0356272	-0.0355684	-0.0355143	-0.0351816	-0.03489	-0.0346997	-0.0346766	-0.0346582	-0.0344564	-0.0340135	-0.0340112	-0.0339413	-0.0339033	-0.0337484	-0.0331131	-0.0330737	-0.0330189	-0.0328579	-0.0326225	-0.0325878	-0.0325463	-0.0322306	-0.0319195	-0.0318976	-0.0318462	-0.0316615	-0.0315651	-0.0314551	-0.0314285	-0.0312933	-0.0312634	-0.0312133	-0.0310303	-0.0307894	-0.0306692	-0.030445
-0.0397394	-0.0396521	-0.0395851	-0.0395793	-0.0388744	-0.0383968	-0.0378412	-0.0377141	-0.0376232	-0.0375619	-0.0372781	-0.0367793	-0.0366412	-0.0357087	-0.0356289	-0.0355701	-0.035516	-0.0351833	-0.0348917	-0.0347014	-0.0346782	-0.0346599	-0.0344581	-0.0340151	-0.0340129	-0.0339429	-0.033905	-0.03375	-0.0331147	-0.0330753	-0.0330204	-0.0328594	-0.032624	-0.0325894	-0.0325479	-0.0322321	-0.031921	-0.0318991	-0.0318477	-0.031663	-0.0315666	-0.0314566	-0.03143	-0.0312948	-0.0312649	-0.0312148	-0.0310318	-0.0307909	-0.0306707	-0.0304464
-0.0397453	-0.039658	-0.0395909	-0.0395852	-0.0388802	-0.0384024	-0.0378468	-0.0377196	-0.0376287	-0.0375675	-0.0372836	-0.0367847	-0.0366466	-0.0357139	-0.0356342	-0.0355753	-0.0355213	-0.0351885	-0.0348969	-0.0347065	-0.0346834	-0.034665	-0.0344632	-0.0340201	-0.0340179	-0.0339479	-0.03391	-0.033755	-0.0331196	-0.0330802	-0.0330253	-0.0328643	-0.0326288	-0.0325942	-0.0325527	-0.0322369	-0.0319258	-0.0319039	-0.0318525	-0.0316677	-0.0315713	-0.0314612	-0.0314347	-0.0312994	-0.0312696	-0.0312194	-0.0310364	-0.0307954	-0.0306752	-0.0304509
-0.0397474	-0.0396601	-0.039593	-0.0395873	-0.0388822	-0.0384044	-0.0378488	-0.0377216	-0.0376307	-0.0375694	-0.0372855	-0.0367867	-0.0366485	-0.0357158	-0.035636	-0.0355772	-0.0355231	-0.0351904	-0.0348987	-0.0347083	-0.0346852	-0.0346668	-0.034465	-0.0340219	-0.0340196	-0.0339497	-0.0339117	-0.0337568	-0.0331213	-0.0330819	-0.033027	-0.032866	-0.0326305	-0.0325959	-0.0325544	-0.0322385	-0.0319274	-0.0319055	-0.0318541	-0.0316693	-0.0315729	-0.0314629	-0.0314363	-0.031301	-0.0312712	-0.031221	-0.031038	-0.030797	-0.0306768	-0.0304525
-0.0397537	-0.0396664	-0.0395993	-0.0395936	-0.0388884	-0.0384106	-0.0378548	-0.0377276	-0.0376367	-0.0375754	-0.0372915	-0.0367925	-0.0366543	-0.0357215	-0.0356417	-0.0355829	-0.0355288	-0.035196	-0.0349043	-0.0347139	-0.0346907	-0.0346723	-0.0344705	-0.0340273	-0.0340251	-0.0339551	-0.0339172	-0.0337622	-0.0331266	-0.0330872	-0.0330323	-0.0328713	-0.0326358	-0.0326011	-0.0325596	-0.0322437	-0.0319325	-0.0319106	-0.0318592	-0.0316744	-0.0315779	-0.0314679	-0.0314413	-0.031306	-0.0312762	-0.031226	-0.0310429	-0.0308019	-0.0306817	-0.0304574
-0.0397589	-0.0396716	-0.0396045	-0.0395988	-0.0388935	-0.0384156	-0.0378598	-0.0377326	-0.0376416	-0.0375803	-0.0372964	-0.0367974	-0.0366591	-0.0357262	-0.0356464	-0.0355875	-0.0355334	-0.0352006	-0.0349088	-0.0347184	-0.0346953	-0.0346769	-0.034475	-0.0340318	-0.0340295	-0.0339596	-0.0339216	-0.0337666	-0.033131	-0.0330915	-0.0330366	-0.0328756	-0.03264	-0.0326054	-0.0325639	-0.0322479	-0.0319367	-0.0319148	-0.0318634	-0.0316786	-0.0315821	-0.031472	-0.0314454	-0.0313101	-0.0312803	-0.0312301	-0.031047	-0.030806	-0.0306857	-0.0304614
-0.0397591	-0.0396718	-0.0396047	-0.0395989	-0.0388937	-0.0384158	-0.0378599	-0.0377327	-0.0376418	-0.0375805	-0.0372965	-0.0367975	-0.0366593	-0.0357263	-0.0356466	-0.0355877	-0.0355336	-0.0352008	-0.034909	-0.0347186	-0.0346954	-0.034677	-0.0344752	-0.0340319	-0.0340297	-0.0339597	-0.0339218	-0.0337667	-0.0331311	-0.0330917	-0.0330368	-0.0328757	-0.0326402	-0.0326055	-0.032564	-0.0322481	-0.0319368	-0.0319149	-0.0318635	-0.0316787	-0.0315822	-0.0314722	-0.0314456	-0.0313103	-0.0312804	-0.0312303	-0.0310471	-0.0308061	-0.0306859	-0.0304615
-0.0397787	-0.0396913	-0.0396241	-0.0396184	-0.0389128	-0.0384347	-0.0378786	-0.0377513	-0.0376603	-0.037599	-0.0373149	-0.0368156	-0.0366773	-0.0357439	-0.0356641	-0.0356052	-0.0355511	-0.0352181	-0.0349261	-0.0347356	-0.0347125	-0.0346941	-0.0344921	-0.0340487	-0.0340464	-0.0339764	-0.0339384	-0.0337833	-0.0331474	-0.0331079	-0.033053	-0.0328919	-0.0326562	-0.0326216	-0.03258	-0.0322639	-0.0319525	-0.0319306	-0.0318792	-0.0316943	-0.0315977	-0.0314876	-0.031461	-0.0313256	-0.0312958	-0.0312456	-0.0310624	-0.0308213	-0.030701	-0.0304765
-0.0397966	-0.0397092	-0.039642	-0.0396363	-0.0389304	-0.038452	-0.0378957	-0.0377683	-0.0376773	-0.037616	-0.0373317	-0.0368322	-0.0366939	-0.03576	-0.0356802	-0.0356213	-0.0355671	-0.035234	-0.0349419	-0.0347513	-0.0347281	-0.0347098	-0.0345077	-0.034064	-0.0340618	-0.0339918	-0.0339538	-0.0337986	-0.0331624	-0.0331229	-0.033068	-0.0329067	-0.032671	-0.0326363	-0.0325947	-0.0322785	-0.031967	-0.031945	-0.0318936	-0.0317086	-0.031612	-0.0315019	-0.0314753	-0.0313398	-0.0313099	-0.0312597	-0.0310764	-0.0308352	-0.0307148	-0.0304902
-0.0398101	-0.0397227	-0.0396555	-0.0396497	-0.0389436	-0.0384651	-0.0379085	-0.0377811	-0.0376901	-0.0376287	-0.0373444	-0.0368447	-0.0367063	-0.0357722	-0.0356923	-0.0356334	-0.0355792	-0.0352459	-0.0349538	-0.0347631	-0.0347399	-0.0347215	-0.0345194	-0.0340756	-0.0340733	-0.0340033	-0.0339653	-0.03381	-0.0331736	-0.0331341	-0.0330792	-0.0329179	-0.0326821	-0.0326474	-0.0326058	-0.0322894	-0.0319778	-0.0319559	-0.0319044	-0.0317193	-0.0316227	-0.0315125	-0.0314859	-0.0313504	-0.0313206	-0.0312703	-0.031087	-0.0308456	-0.0307252	-0.0305006
-0.0398619	-0.0397744	-0.0397071	-0.0397013	-0.0389943	-0.0385151	-0.0379578	-0.0378303	-0.0377391	-0.0376777	-0.037393	-0.0368927	-0.0367541	-0.0358187	-0.0357387	-0.0356797	-0.0356255	-0.0352918	-0.0349993	-0.0348083	-0.0347851	-0.0347667	-0.0345643	-0.0341199	-0.0341177	-0.0340475	-0.0340095	-0.033854	-0.0332168	-0.0331772	-0.0331222	-0.0329607	-0.0327246	-0.0326898	-0.0326482	-0.0323314	-0.0320194	-0.0319975	-0.0319459	-0.0317606	-0.0316639	-0.0315536	-0.0315269	-0.0313912	-0.0313613	-0.031311	-0.0311274	-0.0308858	-0.0307652	-0.0305403
-0.039863	-0.0397755	-0.0397082	-0.0397024	-0.0389954	-0.0385162	-0.0379589	-0.0378314	-0.0377402	-0.0376787	-0.037394	-0.0368937	-0.0367551	-0.0358197	-0.0357397	-0.0356807	-0.0356265	-0.0352928	-0.0350002	-0.0348093	-0.0347861	-0.0347677	-0.0345653	-0.0341209	-0.0341186	-0.0340485	-0.0340104	-0.033855	-0.0332177	-0.0331782	-0.0331231	-0.0329616	-0.0327255	-0.0326908	-0.0326491	-0.0323324	-0.0320203	-0.0319984	-0.0319468	-0.0317615	-0.0316648	-0.0315544	-0.0315278	-0.0313921	-0.0313622	-0.0313119	-0.0311283	-0.0308866	-0.0307661	-0.0305411
-0.0398639	-0.0397763	-0.039709	-0.0397033	-0.0389962	-0.038517	-0.0379597	-0.0378321	-0.037741	-0.0376795	-0.0373948	-0.0368945	-0.0367559	-0.0358205	-0.0357405	-0.0356815	-0.0356272	-0.0352935	-0.035001	-0.03481	-0.0347868	-0.0347684	-0.034566	-0.0341216	-0.0341194	-0.0340492	-0.0340112	-0.0338557	-0.0332184	-0.0331789	-0.0331238	-0.0329623	-0.0327262	-0.0326914	-0.0326498	-0.032333	-0.032021	-0.031999	-0.0319475	-0.0317622	-0.0316654	-0.0315551	-0.0315284	-0.0313928	-0.0313629	-0.0313126	-0.0311289	-0.0308873	-0.0307667	-0.0305418
-0.0398799	-0.0397923	-0.039725	-0.0397193	-0.0390119	-0.0385325	-0.037975	-0.0378474	-0.0377562	-0.0376947	-0.0374099	-0.0369093	-0.0367707	-0.0358349	-0.0357549	-0.0356959	-0.0356416	-0.0353077	-0.0350151	-0.0348241	-0.0348009	-0.0347824	-0.0345799	-0.0341354	-0.0341331	-0.0340629	-0.0340249	-0.0338693	-0.0332318	-0.0331922	-0.0331372	-0.0329756	-0.0327394	-0.0327046	-0.032663	-0.0323461	-0.0320339	-0.0320119	-0.0319603	-0.031775	-0.0316782	-0.0315678	-0.0315411	-0.0314054	-0.0313755	-0.0313252	-0.0311415	-0.0308997	-0.0307791	-0.0305541
-0.0399099	-0.0398223	-0.0397549	-0.0397491	-0.0390412	-0.0385615	-0.0380035	-0.0378758	-0.0377846	-0.0377231	-0.037438	-0.0369371	-0.0367983	-0.0358618	-0.0357818	-0.0357227	-0.0356684	-0.0353343	-0.0350414	-0.0348503	-0.034827	-0.0348086	-0.0346059	-0.034161	-0.0341588	-0.0340885	-0.0340504	-0.0338948	-0.0332568	-0.0332172	-0.0331621	-0.0330004	-0.032764	-0.0327292	-0.0326875	-0.0323704	-0.032058	-0.032036	-0.0319844	-0.0317989	-0.031702	-0.0315915	-0.0315649	-0.031429	-0.0313991	-0.0313487	-0.0311649	-0.030923	-0.0308023	-0.030577
-0.0399296	-0.0398419	-0.0397745	-0.0397687	-0.0390605	-0.0385805	-0.0380223	-0.0378945	-0.0378032	-0.0377417	-0.0374565	-0.0369553	-0.0368165	-0.0358795	-0.0357994	-0.0357403	-0.035686	-0.0353517	-0.0350587	-0.0348674	-0.0348442	-0.0348257	-0.034623	-0.0341779	-0.0341756	-0.0341053	-0.0340672	-0.0339115	-0.0332732	-0.0332336	-0.0331785	-0.0330167	-0.0327801	-0.0327453	-0.0327037	-0.0323863	-0.0320738	-0.0320518	-0.0320001	-0.0318145	-0.0317176	-0.0316071	-0.0315804	-0.0314445	-0.0314146	-0.0313642	-0.0311803	-0.0309382	-0.0308174	-0.0305921
-0.0399819	-0.0398941	-0.0398266	-0.0398209	-0.0391117	-0.0386311	-0.0380721	-0.0379442	-0.0378527	-0.0377911	-0.0375055	-0.0370037	-0.0368647	-0.0359266	-0.0358463	-0.0357871	-0.0357327	-0.035398	-0.0351046	-0.0349131	-0.0348899	-0.0348714	-0.0346684	-0.0342227	-0.0342204	-0.03415	-0.0341119	-0.033956	-0.0333168	-0.0332771	-0.0332219	-0.0330599	-0.0328231	-0.0327883	-0.0327465	-0.0324288	-0.0321158	-0.0320938	-0.0320421	-0.0318562	-0.0317592	-0.0316485	-0.0316218	-0.0314857	-0.0314557	-0.0314053	-0.0312211	-0.0309788	-0.0308578	-0.0306322
-0.0399924	-0.0399046	-0.0398371	-0.0398313	-0.0391219	-0.0386412	-0.0380821	-0.0379541	-0.0378627	-0.037801	-0.0375154	-0.0370134	-0.0368744	-0.035936	-0.0358557	-0.0357965	-0.0357421	-0.0354073	-0.0351138	-0.0349223	-0.034899	-0.0348805	-0.0346775	-0.0342316	-0.0342294	-0.034159	-0.0341208	-0.0339649	-0.0333255	-0.0332858	-0.0332307	-0.0330686	-0.0328317	-0.0327969	-0.0327551	-0.0324373	-0.0321243	-0.0321022	-0.0320505	-0.0318646	-0.0317675	-0.0316569	-0.0316301	-0.031494	-0.031464	-0.0314135	-0.0312293	-0.0309869	-0.0308659	-0.0306403
-0.0399982	-0.0399104	-0.0398429	-0.0398371	-0.0391276	-0.0386468	-0.0380876	-0.0379596	-0.0378682	-0.0378065	-0.0375208	-0.0370188	-0.0368798	-0.0359412	-0.0358609	-0.0358017	-0.0357473	-0.0354124	-0.0351189	-0.0349274	-0.0349041	-0.0348856	-0.0346825	-0.0342366	-0.0342343	-0.034164	-0.0341258	-0.0339698	-0.0333304	-0.0332907	-0.0332355	-0.0330734	-0.0328365	-0.0328016	-0.0327599	-0.032442	-0.0321289	-0.0321069	-0.0320551	-0.0318692	-0.0317721	-0.0316614	-0.0316347	-0.0314986	-0.0314685	-0.0314181	-0.0312338	-0.0309914	-0.0308704	-0.0306447
-0.0399996	-0.0399117	-0.0398442	-0.0398385	-0.0391289	-0.0386481	-0.0380889	-0.0379609	-0.0378695	-0.0378078	-0.0375221	-0.0370201	-0.036881	-0.0359424	-0.0358622	-0.0358029	-0.0357485	-0.0354137	-0.0351201	-0.0349286	-0.0349053	-0.0348868	-0.0346837	-0.0342378	-0.0342355	-0.0341651	-0.0341269	-0.033971	-0.0333315	-0.0332918	-0.0332366	-0.0330745	-0.0328376	-0.0328027	-0.032761	-0.0324431	-0.03213	-0.032108	-0.0320562	-0.0318703	-0.0317732	-0.0316625	-0.0316358	-0.0314996	-0.0314696	-0.0314192	-0.0312349	-0.0309924	-0.0308715	-0.0306458
-0.0400039	-0.039916	-0.0398485	-0.0398427	-0.0391331	-0.0386522	-0.038093	-0.037965	-0.0378735	-0.0378118	-0.0375261	-0.037024	-0.036885	-0.0359462	-0.035866	-0.0358068	-0.0357523	-0.0354174	-0.0351239	-0.0349323	-0.034909	-0.0348905	-0.0346874	-0.0342414	-0.0342392	-0.0341688	-0.0341306	-0.0339746	-0.033335	-0.0332954	-0.0332402	-0.0330781	-0.0328411	-0.0328062	-0.0327645	-0.0324466	-0.0321334	-0.0321114	-0.0320596	-0.0318737	-0.0317766	-0.0316659	-0.0316391	-0.031503	-0.031473	-0.0314225	-0.0312382	-0.0309957	-0.0308748	-0.030649
-0.0400078	-0.0399199	-0.0398524	-0.0398466	-0.039137	-0.0386561	-0.0380968	-0.0379687	-0.0378772	-0.0378156	-0.0375298	-0.0370277	-0.0368886	-0.0359498	-0.0358695	-0.0358103	-0.0357559	-0.0354209	-0.0351273	-0.0349357	-0.0349124	-0.034894	-0.0346908	-0.0342448	-0.0342426	-0.0341721	-0.034134	-0.0339779	-0.0333383	-0.0332987	-0.0332434	-0.0330813	-0.0328443	-0.0328095	-0.0327677	-0.0324498	-0.0321366	-0.0321146	-0.0320628	-0.0318769	-0.0317798	-0.031669	-0.0316423	-0.0315061	-0.0314761	-0.0314256	-0.0312413	-0.0309988	-0.0308778	-0.0306521
-0.0400447	-0.0399568	-0.0398892	-0.0398834	-0.0391731	-0.0386917	-0.0381319	-0.0380038	-0.0379122	-0.0378505	-0.0375645	-0.0370619	-0.0369227	-0.035983	-0.0359026	-0.0358434	-0.0357889	-0.0354536	-0.0351598	-0.034968	-0.0349447	-0.0349262	-0.0347228	-0.0342764	-0.0342742	-0.0342037	-0.0341655	-0.0340093	-0.0333691	-0.0333294	-0.0332741	-0.0331119	-0.0328747	-0.0328398	-0.032798	-0.0324797	-0.0321663	-0.0321442	-0.0320924	-0.0319063	-0.0318091	-0.0316983	-0.0316715	-0.0315352	-0.0315051	-0.0314546	-0.0312702	-0.0310274	-0.0309063	-0.0306803
-0.0400589	-0.0399709	-0.0399033	-0.0398976	-0.039187	-0.0387055	-0.0381454	-0.0380173	-0.0379256	-0.0378639	-0.0375778	-0.037075	-0.0369357	-0.0359957	-0.0359154	-0.0358561	-0.0358016	-0.0354662	-0.0351722	-0.0349804	-0.0349571	-0.0349385	-0.0347351	-0.0342886	-0.0342863	-0.0342158	-0.0341776	-0.0340214	-0.0333809	-0.0333412	-0.0332859	-0.0331236	-0.0328863	-0.0328514	-0.0328096	-0.0324912	-0.0321777	-0.0321556	-0.0321038	-0.0319176	-0.0318204	-0.0317095	-0.0316827	-0.0315464	-0.0315163	-0.0314658	-0.0312813	-0.0310384	-0.0309173	-0.0306912
-0.0400704	-0.0399824	-0.0399147	-0.039909	-0.0391982	-0.0387165	-0.0381563	-0.0380281	-0.0379365	-0.0378747	-0.0375885	-0.0370856	-0.0369463	-0.036006	-0.0359256	-0.0358663	-0.0358118	-0.0354763	-0.0351823	-0.0349904	-0.034967	-0.0349485	-0.0347451	-0.0342984	-0.0342961	-0.0342256	-0.0341873	-0.0340311	-0.0333905	-0.0333507	-0.0332954	-0.0331331	-0.0328957	-0.0328608	-0.032819	-0.0325005	-0.0321869	-0.0321648	-0.032113	-0.0319267	-0.0318295	-0.0317186	-0.0316918	-0.0315554	-0.0315253	-0.0314748	-0.0312902	-0.0310473	-0.0309261	-0.0307
-0.0400719	-0.0399839	-0.0399163	-0.0399105	-0.0391997	-0.038718	-0.0381578	-0.0380296	-0.0379379	-0.0378762	-0.03759	-0.037087	-0.0369477	-0.0360074	-0.035927	-0.0358677	-0.0358132	-0.0354777	-0.0351836	-0.0349917	-0.0349684	-0.0349499	-0.0347464	-0.0342997	-0.0342974	-0.0342269	-0.0341886	-0.0340324	-0.0333918	-0.033352	-0.0332967	-0.0331343	-0.032897	-0.032862	-0.0328202	-0.0325018	-0.0321881	-0.032166	-0.0321142	-0.0319279	-0.0318307	-0.0317198	-0.031693	-0.0315566	-0.0315265	-0.031476	-0.0312914	-0.0310485	-0.0309273	-0.0307012
-0.0400742	-0.0399862	-0.0399186	-0.0399128	-0.0392019	-0.0387202	-0.03816	-0.0380318	-0.0379401	-0.0378784	-0.0375921	-0.0370892	-0.0369498	-0.0360095	-0.0359291	-0.0358698	-0.0358152	-0.0354797	-0.0351857	-0.0349937	-0.0349704	-0.0349519	-0.0347484	-0.0343017	-0.0342994	-0.0342289	-0.0341906	-0.0340344	-0.0333937	-0.0333539	-0.0332986	-0.0331363	-0.0328989	-0.0328639	-0.0328221	-0.0325037	-0.03219	-0.0321679	-0.0321161	-0.0319298	-0.0318325	-0.0317216	-0.0316948	-0.0315584	-0.0315283	-0.0314778	-0.0312932	-0.0310503	-0.0309291	-0.0307029
-0.0400825	-0.0399944	-0.0399268	-0.039921	-0.03921	-0.0387282	-0.0381678	-0.0380396	-0.0379479	-0.0378861	-0.0375998	-0.0370968	-0.0369574	-0.0360169	-0.0359365	-0.0358771	-0.0358226	-0.035487	-0.0351929	-0.0350009	-0.0349776	-0.034959	-0.0347555	-0.0343087	-0.0343064	-0.0342359	-0.0341976	-0.0340413	-0.0334005	-0.0333608	-0.0333055	-0.0331431	-0.0329056	-0.0328707	-0.0328288	-0.0325103	-0.0321966	-0.0321745	-0.0321226	-0.0319363	-0.0318391	-0.0317281	-0.0317013	-0.0315649	-0.0315348	-0.0314842	-0.0312996	-0.0310566	-0.0309354	-0.0307092
-0.0400939	-0.0400058	-0.0399381	-0.0399323	-0.0392211	-0.0387392	-0.0381787	-0.0380504	-0.0379587	-0.0378969	-0.0376105	-0.0371073	-0.0369679	-0.0360271	-0.0359467	-0.0358873	-0.0358328	-0.0354971	-0.0352029	-0.0350109	-0.0349875	-0.034969	-0.0347654	-0.0343185	-0.0343162	-0.0342456	-0.0342074	-0.034051	-0.03341	-0.0333703	-0.0333149	-0.0331525	-0.032915	-0.03288	-0.0328382	-0.0325196	-0.0322057	-0.0321836	-0.0321318	-0.0319454	-0.0318481	-0.0317371	-0.0317103	-0.0315739	-0.0315438	-0.0314932	-0.0313085	-0.0310655	-0.0309442	-0.030718
-0.0401041	-0.040016	-0.0399483	-0.0399425	-0.0392311	-0.0387491	-0.0381884	-0.0380601	-0.0379684	-0.0379066	-0.0376201	-0.0371168	-0.0369774	-0.0360363	-0.0359558	-0.0358965	-0.0358419	-0.0355062	-0.0352119	-0.0350198	-0.0349964	-0.0349779	-0.0347743	-0.0343272	-0.0343249	-0.0342544	-0.0342161	-0.0340597	-0.0334186	-0.0333788	-0.0333234	-0.0331609	-0.0329234	-0.0328884	-0.0328466	-0.0325278	-0.0322139	-0.0321918	-0.03214	-0.0319535	-0.0318562	-0.0317452	-0.0317184	-0.0315819	-0.0315518	-0.0315012	-0.0313165	-0.0310734	-0.0309521	-0.0307258
-0.0401135	-0.0400254	-0.0399577	-0.0399519	-0.0392404	-0.0387582	-0.0381974	-0.0380691	-0.0379773	-0.0379155	-0.037629	-0.0371256	-0.0369861	-0.0360448	-0.0359643	-0.0359049	-0.0358504	-0.0355146	-0.0352202	-0.0350281	-0.0350047	-0.0349862	-0.0347825	-0.0343353	-0.0343331	-0.0342625	-0.0342242	-0.0340677	-0.0334265	-0.0333867	-0.0333313	-0.0331688	-0.0329312	-0.0328962	-0.0328543	-0.0325355	-0.0322216	-0.0321994	-0.0321476	-0.0319611	-0.0318638	-0.0317527	-0.0317259	-0.0315894	-0.0315593	-0.0315087	-0.0313239	-0.0310807	-0.0309594	-0.0307331
-0.0401149	-0.0400268	-0.0399591	-0.0399533	-0.0392418	-0.0387596	-0.0381988	-0.0380704	-0.0379786	-0.0379168	-0.0376303	-0.0371268	-0.0369874	-0.0360461	-0.0359656	-0.0359062	-0.0358516	-0.0355158	-0.0352214	-0.0350293	-0.0350059	-0.0349874	-0.0347837	-0.0343365	-0.0343342	-0.0342636	-0.0342253	-0.0340689	-0.0334276	-0.0333878	-0.0333324	-0.0331699	-0.0329323	-0.0328973	-0.0328554	-0.0325367	-0.0322227	-0.0322005	-0.0321487	-0.0319622	-0.0318648	-0.0317538	-0.031727	-0.0315905	-0.0315604	-0.0315097	-0.031325	-0.0310818	-0.0309605	-0.0307341
-0.040149	-0.0400608	-0.0399931	-0.0399873	-0.0392751	-0.0387925	-0.0382312	-0.0381028	-0.0380109	-0.0379491	-0.0376623	-0.0371584	-0.0370188	-0.0360767	-0.0359961	-0.0359367	-0.0358821	-0.035546	-0.0352513	-0.0350591	-0.0350357	-0.0350171	-0.0348133	-0.0343657	-0.0343634	-0.0342928	-0.0342544	-0.0340979	-0.033456	-0.0334162	-0.0333608	-0.0331981	-0.0329603	-0.0329253	-0.0328834	-0.0325643	-0.0322501	-0.0322279	-0.032176	-0.0319894	-0.0318919	-0.0317808	-0.031754	-0.0316173	-0.0315872	-0.0315365	-0.0313516	-0.0311082	-0.0309868	-0.0307602
-0.0401616	-0.0400734	-0.0400056	-0.0399998	-0.0392874	-0.0388047	-0.0382432	-0.0381147	-0.0380228	-0.0379609	-0.0376741	-0.03717	-0.0370304	-0.036088	-0.0360074	-0.035948	-0.0358933	-0.0355571	-0.0352624	-0.03507	-0.0350466	-0.0350281	-0.0348242	-0.0343764	-0.0343742	-0.0343035	-0.0342652	-0.0341086	-0.0334665	-0.0334267	-0.0333712	-0.0332085	-0.0329706	-0.0329356	-0.0328937	-0.0325745	-0.0322602	-0.032238	-0.0321861	-0.0319994	-0.0319019	-0.0317908	-0.0317639	-0.0316272	-0.0315971	-0.0315464	-0.0313614	-0.031118	-0.0309965	-0.0307699
-0.040165	-0.0400768	-0.040009	-0.0400032	-0.0392908	-0.038808	-0.0382465	-0.0381179	-0.0380261	-0.0379642	-0.0376773	-0.0371732	-0.0370336	-0.0360911	-0.0360105	-0.035951	-0.0358964	-0.0355601	-0.0352654	-0.035073	-0.0350496	-0.0350311	-0.0348271	-0.0343794	-0.0343771	-0.0343064	-0.0342681	-0.0341115	-0.0334693	-0.0334295	-0.0333741	-0.0332113	-0.0329734	-0.0329384	-0.0328965	-0.0325773	-0.0322629	-0.0322408	-0.0321888	-0.0320021	-0.0319046	-0.0317935	-0.0317666	-0.0316299	-0.0315998	-0.0315491	-0.0313641	-0.0311206	-0.0309991	-0.0307725
-0.0401689	-0.0400807	-0.0400129	-0.0400071	-0.0392946	-0.0388117	-0.0382502	-0.0381216	-0.0380297	-0.0379678	-0.0376809	-0.0371768	-0.0370371	-0.0360946	-0.036014	-0.0359545	-0.0358998	-0.0355636	-0.0352688	-0.0350764	-0.035053	-0.0350345	-0.0348305	-0.0343827	-0.0343804	-0.0343097	-0.0342714	-0.0341148	-0.0334726	-0.0334327	-0.0333773	-0.0332145	-0.0329766	-0.0329416	-0.0328997	-0.0325804	-0.032266	-0.0322439	-0.0321919	-0.0320052	-0.0319077	-0.0317965	-0.0317697	-0.031633	-0.0316028	-0.0315521	-0.0313671	-0.0311236	-0.0310021	-0.0307755
-0.040194	-0.0401057	-0.0400378	-0.040032	-0.0393191	-0.0388359	-0.038274	-0.0381454	-0.0380535	-0.0379915	-0.0377044	-0.0372	-0.0370602	-0.0361171	-0.0360364	-0.0359769	-0.0359222	-0.0355857	-0.0352908	-0.0350983	-0.0350749	-0.0350563	-0.0348522	-0.0344041	-0.0344019	-0.0343311	-0.0342928	-0.034136	-0.0334935	-0.0334536	-0.0333981	-0.0332353	-0.0329972	-0.0329621	-0.0329202	-0.0326008	-0.0322861	-0.032264	-0.032212	-0.0320252	-0.0319276	-0.0318164	-0.0317895	-0.0316527	-0.0316225	-0.0315718	-0.0313867	-0.031143	-0.0310215	-0.0307947
-0.0401977	-0.0401094	-0.0400416	-0.0400358	-0.0393227	-0.0388395	-0.0382776	-0.038149	-0.038057	-0.0379951	-0.037708	-0.0372034	-0.0370637	-0.0361204	-0.0360398	-0.0359803	-0.0359256	-0.0355891	-0.0352941	-0.0351016	-0.0350781	-0.0350596	-0.0348555	-0.0344073	-0.0344051	-0.0343343	-0.034296	-0.0341392	-0.0334966	-0.0334567	-0.0334012	-0.0332384	-0.0330002	-0.0329652	-0.0329233	-0.0326038	-0.0322892	-0.032267	-0.032215	-0.0320282	-0.0319306	-0.0318193	-0.0317925	-0.0316557	-0.0316255	-0.0315748	-0.0313896	-0.0311459	-0.0310244	-0.0307975
-0.040234	-0.0401457	-0.0400778	-0.0400719	-0.0393583	-0.0388746	-0.0383122	-0.0381834	-0.0380914	-0.0380294	-0.037742	-0.0372371	-0.0370972	-0.0361531	-0.0360724	-0.0360128	-0.035958	-0.0356212	-0.035326	-0.0351333	-0.0351098	-0.0350913	-0.034887	-0.0344384	-0.0344362	-0.0343654	-0.034327	-0.0341701	-0.0335268	-0.0334869	-0.0334314	-0.0332684	-0.0330301	-0.032995	-0.032953	-0.0326333	-0.0323183	-0.0322962	-0.0322441	-0.0320571	-0.0319595	-0.0318481	-0.0318212	-0.0316843	-0.0316541	-0.0316033	-0.031418	-0.0311741	-0.0310524	-0.0308254
-0.0402427	-0.0401543	-0.0400864	-0.0400806	-0.0393667	-0.038883	-0.0383204	-0.0381916	-0.0380996	-0.0380376	-0.0377501	-0.0372451	-0.0371052	-0.0361608	-0.0360801	-0.0360205	-0.0359658	-0.0356289	-0.0353336	-0.0351408	-0.0351174	-0.0350988	-0.0348945	-0.0344458	-0.0344436	-0.0343728	-0.0343343	-0.0341774	-0.0335341	-0.0334941	-0.0334386	-0.0332755	-0.0330372	-0.0330021	-0.0329601	-0.0326403	-0.0323253	-0.0323031	-0.032251	-0.032064	-0.0319663	-0.0318549	-0.031828	-0.0316911	-0.0316609	-0.0316101	-0.0314247	-0.0311808	-0.0310591	-0.030832
-0.0402531	-0.0401647	-0.0400968	-0.040091	-0.0393769	-0.0388931	-0.0383303	-0.0382016	-0.0381095	-0.0380475	-0.0377599	-0.0372547	-0.0371148	-0.0361702	-0.0360895	-0.0360299	-0.0359751	-0.0356381	-0.0353427	-0.0351499	-0.0351265	-0.0351079	-0.0349035	-0.0344548	-0.0344525	-0.0343817	-0.0343432	-0.0341863	-0.0335428	-0.0335028	-0.0334473	-0.0332842	-0.0330457	-0.0330107	-0.0329686	-0.0326487	-0.0323337	-0.0323115	-0.0322594	-0.0320723	-0.0319746	-0.0318632	-0.0318363	-0.0316993	-0.0316691	-0.0316183	-0.0314329	-0.0311889	-0.0310671	-0.03084
-0.0402578	-0.0401694	-0.0401014	-0.0400956	-0.0393815	-0.0388976	-0.0383348	-0.038206	-0.0381139	-0.0380519	-0.0377643	-0.0372591	-0.0371191	-0.0361745	-0.0360937	-0.0360341	-0.0359793	-0.0356423	-0.0353469	-0.035154	-0.0351306	-0.035112	-0.0349076	-0.0344588	-0.0344565	-0.0343857	-0.0343473	-0.0341903	-0.0335467	-0.0335067	-0.0334512	-0.0332881	-0.0330496	-0.0330145	-0.0329725	-0.0326526	-0.0323374	-0.0323152	-0.0322632	-0.0320761	-0.0319784	-0.0318669	-0.03184	-0.031703	-0.0316728	-0.031622	-0.0314366	-0.0311925	-0.0310708	-0.0308436
-0.0402861	-0.0401976	-0.0401296	-0.0401238	-0.0394092	-0.0389249	-0.0383617	-0.0382328	-0.0381407	-0.0380786	-0.0377909	-0.0372852	-0.0371452	-0.0361999	-0.036119	-0.0360594	-0.0360046	-0.0356673	-0.0353717	-0.0351787	-0.0351553	-0.0351367	-0.0349321	-0.034483	-0.0344807	-0.0344098	-0.0343714	-0.0342143	-0.0335702	-0.0335303	-0.0334747	-0.0333114	-0.0330728	-0.0330377	-0.0329956	-0.0326755	-0.0323601	-0.0323379	-0.0322858	-0.0320986	-0.0320008	-0.0318893	-0.0318624	-0.0317252	-0.031695	-0.0316442	-0.0314586	-0.0312144	-0.0310926	-0.0308652
-0.040289	-0.0402005	-0.0401325	-0.0401267	-0.039412	-0.0389277	-0.0383645	-0.0382356	-0.0381434	-0.0380813	-0.0377936	-0.0372879	-0.0371478	-0.0362024	-0.0361216	-0.036062	-0.0360071	-0.0356699	-0.0353742	-0.0351812	-0.0351578	-0.0351392	-0.0349346	-0.0344855	-0.0344832	-0.0344123	-0.0343738	-0.0342167	-0.0335726	-0.0335326	-0.0334771	-0.0333138	-0.0330751	-0.03304	-0.032998	-0.0326778	-0.0323625	-0.0323402	-0.0322881	-0.0321009	-0.0320031	-0.0318916	-0.0318646	-0.0317275	-0.0316973	-0.0316464	-0.0314609	-0.0312166	-0.0310948	-0.0308674
-0.0402952	-0.0402067	-0.0401387	-0.0401329	-0.0394181	-0.0389337	-0.0383704	-0.0382415	-0.0381493	-0.0380872	-0.0377994	-0.0372937	-0.0371536	-0.036208	-0.0361272	-0.0360675	-0.0360127	-0.0356754	-0.0353797	-0.0351867	-0.0351632	-0.0351446	-0.03494	-0.0344908	-0.0344885	-0.0344176	-0.0343791	-0.034222	-0.0335778	-0.0335378	-0.0334822	-0.033319	-0.0330803	-0.0330452	-0.0330031	-0.0326829	-0.0323675	-0.0323453	-0.0322931	-0.0321058	-0.032008	-0.0318965	-0.0318696	-0.0317324	-0.0317022	-0.0316513	-0.0314657	-0.0312215	-0.0310996	-0.0308722
-0.0402956	-0.0402071	-0.0401391	-0.0401333	-0.0394185	-0.0389341	-0.0383708	-0.0382419	-0.0381497	-0.0380876	-0.0377998	-0.037294	-0.037154	-0.0362084	-0.0361276	-0.0360679	-0.0360131	-0.0356757	-0.03538	-0.035187	-0.0351636	-0.035145	-0.0349404	-0.0344911	-0.0344889	-0.034418	-0.0343795	-0.0342224	-0.0335782	-0.0335382	-0.0334826	-0.0333193	-0.0330806	-0.0330455	-0.0330034	-0.0326832	-0.0323678	-0.0323456	-0.0322935	-0.0321062	-0.0320084	-0.0318968	-0.0318699	-0.0317327	-0.0317025	-0.0316517	-0.0314661	-0.0312218	-0.0310999	-0.0308725
-0.0402991	-0.0402106	-0.0401426	-0.0401368	-0.0394219	-0.0389375	-0.0383741	-0.0382452	-0.038153	-0.0380909	-0.0378031	-0.0372973	-0.0371572	-0.0362116	-0.0361307	-0.036071	-0.0360162	-0.0356788	-0.0353831	-0.0351901	-0.0351666	-0.035148	-0.0349434	-0.0344941	-0.0344919	-0.034421	-0.0343825	-0.0342253	-0.0335811	-0.0335411	-0.0334855	-0.0333222	-0.0330835	-0.0330484	-0.0330063	-0.032686	-0.0323706	-0.0323484	-0.0322963	-0.032109	-0.0320112	-0.0318996	-0.0318727	-0.0317355	-0.0317053	-0.0316544	-0.0314688	-0.0312245	-0.0311026	-0.0308752
-0.0403042	-0.0402157	-0.0401477	-0.0401419	-0.0394269	-0.0389425	-0.038379	-0.03825	-0.0381579	-0.0380957	-0.0378079	-0.037302	-0.0371619	-0.0362162	-0.0361353	-0.0360756	-0.0360208	-0.0356834	-0.0353876	-0.0351946	-0.0351711	-0.0351525	-0.0349478	-0.0344985	-0.0344962	-0.0344253	-0.0343868	-0.0342297	-0.0335853	-0.0335454	-0.0334897	-0.0333264	-0.0330877	-0.0330526	-0.0330105	-0.0326902	-0.0323747	-0.0323525	-0.0323004	-0.032113	-0.0320152	-0.0319037	-0.0318767	-0.0317395	-0.0317093	-0.0316584	-0.0314728	-0.0312285	-0.0311066	-0.0308791
-0.0403052	-0.0402167	-0.0401486	-0.0401428	-0.0394279	-0.0389434	-0.0383799	-0.038251	-0.0381588	-0.0380967	-0.0378088	-0.0373029	-0.0371628	-0.036217	-0.0361362	-0.0360765	-0.0360217	-0.0356842	-0.0353885	-0.0351954	-0.0351719	-0.0351533	-0.0349487	-0.0344994	-0.0344971	-0.0344261	-0.0343877	-0.0342305	-0.0335862	-0.0335462	-0.0334905	-0.0333272	-0.0330885	-0.0330534	-0.0330113	-0.032691	-0.0323755	-0.0323533	-0.0323011	-0.0321138	-0.032016	-0.0319044	-0.0318775	-0.0317403	-0.0317101	-0.0316592	-0.0314735	-0.0312292	-0.0311073	-0.0308799
-0.0403119	-0.0402234	-0.0401553	-0.0401495	-0.0394345	-0.0389499	-0.0383863	-0.0382574	-0.0381652	-0.038103	-0.0378151	-0.0373092	-0.037169	-0.0362231	-0.0361422	-0.0360825	-0.0360277	-0.0356902	-0.0353944	-0.0352013	-0.0351778	-0.0351592	-0.0349545	-0.0345051	-0.0345028	-0.0344319	-0.0343934	-0.0342362	-0.0335918	-0.0335518	-0.0334961	-0.0333328	-0.033094	-0.0330589	-0.0330168	-0.0326964	-0.0323809	-0.0323587	-0.0323065	-0.0321192	-0.0320213	-0.0319098	-0.0318828	-0.0317456	-0.0317154	-0.0316645	-0.0314788	-0.0312344	-0.0311125	-0.030885
-0.040313	-0.0402245	-0.0401564	-0.0401506	-0.0394355	-0.038951	-0.0383874	-0.0382584	-0.0381662	-0.0381041	-0.0378161	-0.0373102	-0.03717	-0.0362241	-0.0361432	-0.0360835	-0.0360286	-0.0356912	-0.0353953	-0.0352022	-0.0351788	-0.0351601	-0.0349554	-0.034506	-0.0345038	-0.0344328	-0.0343943	-0.0342371	-0.0335927	-0.0335527	-0.033497	-0.0333337	-0.0330949	-0.0330598	-0.0330177	-0.0326973	-0.0323818	-0.0323596	-0.0323074	-0.03212	-0.0320222	-0.0319106	-0.0318837	-0.0317465	-0.0317162	-0.0316653	-0.0314797	-0.0312353	-0.0311134	-0.0308859
-0.0403225	-0.0402339	-0.0401659	-0.0401601	-0.0394448	-0.0389601	-0.0383964	-0.0382674	-0.0381752	-0.038113	-0.037825	-0.0373189	-0.0371788	-0.0362326	-0.0361517	-0.036092	-0.0360371	-0.0356996	-0.0354037	-0.0352105	-0.0351871	-0.0351684	-0.0349637	-0.0345142	-0.0345119	-0.0344409	-0.0344024	-0.0342452	-0.0336006	-0.0335606	-0.0335049	-0.0333416	-0.0331027	-0.0330676	-0.0330255	-0.032705	-0.0323894	-0.0323672	-0.032315	-0.0321276	-0.0320297	-0.0319181	-0.0318912	-0.0317539	-0.0317237	-0.0316728	-0.0314871	-0.0312426	-0.0311207	-0.0308932
-0.0403334	-0.0402448	-0.0401767	-0.0401709	-0.0394554	-0.0389706	-0.0384068	-0.0382777	-0.0381855	-0.0381233	-0.0378352	-0.037329	-0.0371888	-0.0362423	-0.0361614	-0.0361017	-0.0360468	-0.0357092	-0.0354132	-0.03522	-0.0351965	-0.0351779	-0.0349731	-0.0345235	-0.0345212	-0.0344502	-0.0344117	-0.0342544	-0.0336096	-0.0335696	-0.033514	-0.0333505	-0.0331116	-0.0330765	-0.0330344	-0.0327138	-0.0323981	-0.0323759	-0.0323237	-0.0321362	-0.0320384	-0.0319267	-0.0318998	-0.0317625	-0.0317322	-0.0316813	-0.0314955	-0.0312511	-0.0311291	-0.0309015
-0.040347	-0.0402584	-0.0401903	-0.0401845	-0.0394688	-0.0389838	-0.0384198	-0.0382907	-0.0381984	-0.0381362	-0.037848	-0.0373416	-0.0372014	-0.0362546	-0.0361737	-0.0361139	-0.0360591	-0.0357213	-0.0354252	-0.035232	-0.0352085	-0.0351898	-0.034985	-0.0345352	-0.0345329	-0.0344619	-0.0344234	-0.034266	-0.033621	-0.033581	-0.0335253	-0.0333618	-0.0331228	-0.0330877	-0.0330456	-0.0327249	-0.0324091	-0.0323869	-0.0323347	-0.0321471	-0.0320492	-0.0319376	-0.0319106	-0.0317733	-0.031743	-0.0316921	-0.0315062	-0.0312616	-0.0311396	-0.0309119
-0.0403602	-0.0402715	-0.0402034	-0.0401976	-0.0394817	-0.0389965	-0.0384323	-0.0383031	-0.0382108	-0.0381486	-0.0378604	-0.0373538	-0.0372135	-0.0362664	-0.0361854	-0.0361257	-0.0360708	-0.0357329	-0.0354367	-0.0352434	-0.0352199	-0.0352013	-0.0349963	-0.0345464	-0.0345441	-0.0344731	-0.0344346	-0.0342772	-0.033632	-0.0335919	-0.0335362	-0.0333727	-0.0331336	-0.0330984	-0.0330563	-0.0327356	-0.0324196	-0.0323974	-0.0323452	-0.0321576	-0.0320596	-0.0319479	-0.031921	-0.0317836	-0.0317533	-0.0317024	-0.0315165	-0.0312718	-0.0311498	-0.030922
-0.0403658	-0.0402772	-0.0402091	-0.0402032	-0.0394872	-0.039002	-0.0384377	-0.0383085	-0.0382162	-0.038154	-0.0378657	-0.0373591	-0.0372187	-0.0362715	-0.0361905	-0.0361308	-0.0360759	-0.0357379	-0.0354417	-0.0352484	-0.0352249	-0.0352062	-0.0350013	-0.0345513	-0.034549	-0.034478	-0.0344394	-0.034282	-0.0336367	-0.0335966	-0.0335409	-0.0333774	-0.0331383	-0.0331031	-0.033061	-0.0327402	-0.0324242	-0.032402	-0.0323497	-0.0321621	-0.0320642	-0.0319524	-0.0319254	-0.0317881	-0.0317578	-0.0317068	-0.0315209	-0.0312762	-0.0311541	-0.0309264
-0.0403663	-0.0402776	-0.0402095	-0.0402037	-0.0394876	-0.0390024	-0.0384381	-0.0383089	-0.0382166	-0.0381544	-0.0378661	-0.0373595	-0.0372191	-0.0362719	-0.0361909	-0.0361312	-0.0360763	-0.0357383	-0.0354421	-0.0352488	-0.0352253	-0.0352066	-0.0350016	-0.0345516	-0.0345494	-0.0344783	-0.0344398	-0.0342824	-0.0336371	-0.033597	-0.0335413	-0.0333778	-0.0331386	-0.0331035	-0.0330613	-0.0327405	-0.0324246	-0.0324023	-0.0323501	-0.0321625	-0.0320645	-0.0319528	-0.0319258	-0.0317884	-0.0317581	-0.0317072	-0.0315213	-0.0312766	-0.0311545	-0.0309267
-0.0403676	-0.0402789	-0.0402108	-0.040205	-0.0394889	-0.0390037	-0.0384394	-0.0383102	-0.0382179	-0.0381556	-0.0378673	-0.0373607	-0.0372203	-0.0362731	-0.0361921	-0.0361323	-0.0360774	-0.0357395	-0.0354432	-0.0352499	-0.0352264	-0.0352077	-0.0350028	-0.0345528	-0.0345505	-0.0344795	-0.0344409	-0.0342835	-0.0336381	-0.0335981	-0.0335424	-0.0333788	-0.0331397	-0.0331045	-0.0330624	-0.0327416	-0.0324256	-0.0324034	-0.0323512	-0.0321635	-0.0320656	-0.0319538	-0.0319268	-0.0317894	-0.0317591	-0.0317082	-0.0315223	-0.0312776	-0.0311555	-0.0309277
-0.0403798	-0.0402911	-0.040223	-0.0402171	-0.0395009	-0.0390155	-0.038451	-0.0383218	-0.0382294	-0.0381672	-0.0378788	-0.037372	-0.0372316	-0.0362841	-0.0362031	-0.0361433	-0.0360883	-0.0357503	-0.035454	-0.0352606	-0.0352371	-0.0352184	-0.0350134	-0.0345632	-0.0345609	-0.0344899	-0.0344513	-0.0342939	-0.0336483	-0.0336083	-0.0335526	-0.0333889	-0.0331497	-0.0331145	-0.0330724	-0.0327515	-0.0324354	-0.0324132	-0.0323609	-0.0321733	-0.0320753	-0.0319635	-0.0319365	-0.0317991	-0.0317688	-0.0317178	-0.0315318	-0.031287	-0.0311649	-0.0309371
-0.0404076	-0.0403188	-0.0402506	-0.0402448	-0.039528	-0.0390423	-0.0384774	-0.0383481	-0.0382557	-0.0381934	-0.0379048	-0.0373977	-0.0372572	-0.036309	-0.0362279	-0.0361681	-0.0361131	-0.0357749	-0.0354783	-0.0352848	-0.0352613	-0.0352426	-0.0350374	-0.034587	-0.0345847	-0.0345136	-0.034475	-0.0343174	-0.0336715	-0.0336314	-0.0335756	-0.0334119	-0.0331725	-0.0331373	-0.0330951	-0.032774	-0.0324577	-0.0324355	-0.0323832	-0.0321954	-0.0320973	-0.0319855	-0.0319584	-0.0318209	-0.0317906	-0.0317396	-0.0315535	-0.0313085	-0.0311863	-0.0309583
-0.0404171	-0.0403284	-0.0402602	-0.0402543	-0.0395374	-0.0390516	-0.0384865	-0.0383572	-0.0382648	-0.0382025	-0.0379138	-0.0374065	-0.037266	-0.0363176	-0.0362365	-0.0361767	-0.0361217	-0.0357833	-0.0354867	-0.0352932	-0.0352696	-0.035251	-0.0350457	-0.0345952	-0.0345929	-0.0345218	-0.0344832	-0.0343256	-0.0336794	-0.0336393	-0.0335836	-0.0334198	-0.0331804	-0.0331452	-0.033103	-0.0327818	-0.0324654	-0.0324431	-0.0323909	-0.032203	-0.0321049	-0.031993	-0.031966	-0.0318285	-0.0317981	-0.0317471	-0.031561	-0.031316	-0.0311937	-0.0309657
-0.0404418	-0.0403529	-0.0402847	-0.0402789	-0.0395615	-0.0390754	-0.03851	-0.0383806	-0.0382881	-0.0382258	-0.0379369	-0.0374293	-0.0372887	-0.0363398	-0.0362586	-0.0361987	-0.0361437	-0.0358052	-0.0355084	-0.0353147	-0.0352911	-0.0352724	-0.0350671	-0.0346163	-0.034614	-0.0345428	-0.0345042	-0.0343465	-0.0337	-0.0336598	-0.033604	-0.0334402	-0.0332006	-0.0331654	-0.0331231	-0.0328018	-0.0324852	-0.0324629	-0.0324106	-0.0322226	-0.0321245	-0.0320125	-0.0319855	-0.0318479	-0.0318175	-0.0317665	-0.0315802	-0.0313351	-0.0312127	-0.0309845
-0.0404615	-0.0403726	-0.0403043	-0.0402985	-0.0395808	-0.0390944	-0.0385288	-0.0383993	-0.0383067	-0.0382444	-0.0379554	-0.0374476	-0.0373069	-0.0363575	-0.0362763	-0.0362164	-0.0361613	-0.0358226	-0.0355257	-0.0353319	-0.0353083	-0.0352896	-0.0350842	-0.0346331	-0.0346308	-0.0345596	-0.034521	-0.0343632	-0.0337164	-0.0336762	-0.0336204	-0.0334565	-0.0332168	-0.0331815	-0.0331393	-0.0328177	-0.032501	-0.0324787	-0.0324264	-0.0322383	-0.0321401	-0.0320281	-0.0320011	-0.0318634	-0.031833	-0.031782	-0.0315956	-0.0313503	-0.0312279	-0.0309996
-0.0404972	-0.0404082	-0.0403399	-0.0403341	-0.0396157	-0.0391289	-0.0385628	-0.0384332	-0.0383406	-0.0382782	-0.0379889	-0.0374806	-0.0373398	-0.0363896	-0.0363083	-0.0362483	-0.0361933	-0.0358542	-0.035557	-0.0353631	-0.0353395	-0.0353208	-0.0351152	-0.0346637	-0.0346614	-0.0345902	-0.0345515	-0.0343936	-0.0337462	-0.033706	-0.0336501	-0.033486	-0.0332461	-0.0332108	-0.0331685	-0.0328467	-0.0325297	-0.0325074	-0.032455	-0.0322668	-0.0321685	-0.0320564	-0.0320293	-0.0318915	-0.0318611	-0.03181	-0.0316235	-0.031378	-0.0312555	-0.031027
-0.0405007	-0.0404118	-0.0403434	-0.0403376	-0.0396192	-0.0391323	-0.0385661	-0.0384365	-0.0383439	-0.0382815	-0.0379922	-0.0374839	-0.0373431	-0.0363927	-0.0363115	-0.0362515	-0.0361964	-0.0358573	-0.0355601	-0.0353662	-0.0353426	-0.0353239	-0.0351182	-0.0346667	-0.0346644	-0.0345932	-0.0345545	-0.0343966	-0.0337491	-0.0337089	-0.033653	-0.0334889	-0.033249	-0.0332137	-0.0331714	-0.0328496	-0.0325326	-0.0325102	-0.0324578	-0.0322696	-0.0321713	-0.0320592	-0.0320321	-0.0318943	-0.0318639	-0.0318128	-0.0316262	-0.0313807	-0.0312582	-0.0310297
-0.0405149	-0.0404259	-0.0403575	-0.0403517	-0.039633	-0.039146	-0.0385796	-0.03845	-0.0383573	-0.0382948	-0.0380055	-0.037497	-0.0373561	-0.0364054	-0.0363241	-0.0362642	-0.036209	-0.0358699	-0.0355725	-0.0353785	-0.0353549	-0.0353362	-0.0351305	-0.0346788	-0.0346765	-0.0346052	-0.0345666	-0.0344086	-0.0337609	-0.0337207	-0.0336648	-0.0335006	-0.0332606	-0.0332253	-0.033183	-0.032861	-0.0325439	-0.0325216	-0.0324692	-0.0322809	-0.0321825	-0.0320704	-0.0320433	-0.0319054	-0.031875	-0.0318239	-0.0316373	-0.0313917	-0.0312692	-0.0310405
-0.0405153	-0.0404263	-0.040358	-0.0403521	-0.0396334	-0.0391464	-0.03858	-0.0384504	-0.0383577	-0.0382953	-0.0380059	-0.0374974	-0.0373565	-0.0364058	-0.0363246	-0.0362646	-0.0362094	-0.0358703	-0.0355729	-0.0353789	-0.0353553	-0.0353366	-0.0351309	-0.0346792	-0.0346769	-0.0346056	-0.0345669	-0.034409	-0.0337613	-0.0337211	-0.0336651	-0.033501	-0.033261	-0.0332257	-0.0331834	-0.0328614	-0.0325443	-0.032522	-0.0324695	-0.0322812	-0.0321829	-0.0320708	-0.0320437	-0.0319058	-0.0318754	-0.0318242	-0.0316376	-0.031392	-0.0312695	-0.0310409
-0.0405166	-0.0404276	-0.0403593	-0.0403534	-0.0396347	-0.0391477	-0.0385813	-0.0384516	-0.038359	-0.0382965	-0.0380071	-0.0374986	-0.0373578	-0.036407	-0.0363257	-0.0362657	-0.0362106	-0.0358714	-0.0355741	-0.03538	-0.0353565	-0.0353377	-0.035132	-0.0346803	-0.034678	-0.0346067	-0.0345681	-0.0344101	-0.0337623	-0.0337221	-0.0336662	-0.0335021	-0.0332621	-0.0332268	-0.0331845	-0.0328625	-0.0325453	-0.032523	-0.0324706	-0.0322823	-0.0321839	-0.0320718	-0.0320447	-0.0319068	-0.0318764	-0.0318253	-0.0316387	-0.0313931	-0.0312705	-0.0310419
-0.0405218	-0.0404327	-0.0403644	-0.0403585	-0.0396397	-0.0391526	-0.0385862	-0.0384565	-0.0383638	-0.0383014	-0.0380119	-0.0375034	-0.0373625	-0.0364116	-0.0363303	-0.0362703	-0.0362152	-0.035876	-0.0355786	-0.0353845	-0.0353609	-0.0353422	-0.0351365	-0.0346847	-0.0346824	-0.0346111	-0.0345724	-0.0344144	-0.0337666	-0.0337264	-0.0336705	-0.0335063	-0.0332663	-0.033231	-0.0331887	-0.0328666	-0.0325495	-0.0325271	-0.0324747	-0.0322863	-0.032188	-0.0320759	-0.0320488	-0.0319108	-0.0318804	-0.0318293	-0.0316427	-0.031397	-0.0312745	-0.0310458
-0.0405489	-0.0404598	-0.0403914	-0.0403855	-0.0396663	-0.0391789	-0.038612	-0.0384822	-0.0383895	-0.038327	-0.0380374	-0.0375285	-0.0373875	-0.036436	-0.0363546	-0.0362946	-0.0362394	-0.0359	-0.0356024	-0.0354082	-0.0353846	-0.0353659	-0.03516	-0.0347079	-0.0347057	-0.0346343	-0.0345956	-0.0344375	-0.0337892	-0.033749	-0.033693	-0.0335287	-0.0332885	-0.0332532	-0.0332109	-0.0328886	-0.0325712	-0.0325489	-0.0324964	-0.032308	-0.0322096	-0.0320973	-0.0320702	-0.0319322	-0.0319018	-0.0318506	-0.0316638	-0.031418	-0.0312954	-0.0310666
-0.0405519	-0.0404628	-0.0403944	-0.0403885	-0.0396692	-0.0391818	-0.0386149	-0.0384851	-0.0383923	-0.0383299	-0.0380402	-0.0375312	-0.0373903	-0.0364387	-0.0363573	-0.0362973	-0.0362421	-0.0359026	-0.0356051	-0.0354108	-0.0353872	-0.0353685	-0.0351626	-0.0347105	-0.0347082	-0.0346369	-0.0345982	-0.03444	-0.0337917	-0.0337515	-0.0336955	-0.0335312	-0.033291	-0.0332557	-0.0332133	-0.0328911	-0.0325737	-0.0325513	-0.0324989	-0.0323104	-0.032212	-0.0320997	-0.0320726	-0.0319346	-0.0319042	-0.031853	-0.0316662	-0.0314204	-0.0312977	-0.0310689
-0.040555	-0.0404659	-0.0403975	-0.0403916	-0.0396722	-0.0391847	-0.0386178	-0.038488	-0.0383953	-0.0383328	-0.0380431	-0.0375341	-0.0373931	-0.0364415	-0.0363601	-0.0363001	-0.0362449	-0.0359054	-0.0356078	-0.0354135	-0.0353899	-0.0353712	-0.0351653	-0.0347132	-0.0347109	-0.0346395	-0.0346008	-0.0344426	-0.0337943	-0.0337541	-0.0336981	-0.0335338	-0.0332935	-0.0332582	-0.0332159	-0.0328936	-0.0325761	-0.0325538	-0.0325013	-0.0323128	-0.0322144	-0.0321022	-0.032075	-0.031937	-0.0319066	-0.0318554	-0.0316686	-0.0314228	-0.0313001	-0.0310713
-0.0405582	-0.0404691	-0.0404006	-0.0403948	-0.0396753	-0.0391878	-0.0386208	-0.038491	-0.0383983	-0.0383358	-0.0380461	-0.037537	-0.037396	-0.0364443	-0.036363	-0.0363029	-0.0362477	-0.0359082	-0.0356106	-0.0354163	-0.0353927	-0.035374	-0.035168	-0.0347159	-0.0347136	-0.0346422	-0.0346035	-0.0344453	-0.0337969	-0.0337567	-0.0337007	-0.0335364	-0.0332961	-0.0332608	-0.0332185	-0.0328962	-0.0325787	-0.0325563	-0.0325039	-0.0323154	-0.0322169	-0.0321047	-0.0320776	-0.0319395	-0.0319091	-0.0318579	-0.0316711	-0.0314252	-0.0313026	-0.0310737
-0.0405714	-0.0404822	-0.0404138	-0.0404079	-0.0396883	-0.0392006	-0.0386334	-0.0385036	-0.0384108	-0.0383483	-0.0380585	-0.0375493	-0.0374082	-0.0364562	-0.0363748	-0.0363147	-0.0362595	-0.0359199	-0.0356221	-0.0354278	-0.0354042	-0.0353855	-0.0351795	-0.0347272	-0.0347249	-0.0346535	-0.0346148	-0.0344566	-0.0338079	-0.0337677	-0.0337117	-0.0335473	-0.033307	-0.0332716	-0.0332293	-0.0329069	-0.0325893	-0.0325669	-0.0325145	-0.0323259	-0.0322274	-0.0321151	-0.032088	-0.0319499	-0.0319195	-0.0318683	-0.0316814	-0.0314355	-0.0313128	-0.0310838
-0.0405715	-0.0404824	-0.0404139	-0.040408	-0.0396884	-0.0392007	-0.0386335	-0.0385037	-0.0384109	-0.0383484	-0.0380586	-0.0375494	-0.0374083	-0.0364563	-0.0363749	-0.0363148	-0.0362596	-0.03592	-0.0356222	-0.0354279	-0.0354043	-0.0353856	-0.0351796	-0.0347273	-0.034725	-0.0346536	-0.0346149	-0.0344567	-0.033808	-0.0337678	-0.0337118	-0.0335474	-0.0333071	-0.0332717	-0.0332294	-0.032907	-0.0325894	-0.032567	-0.0325145	-0.032326	-0.0322275	-0.0321152	-0.0320881	-0.03195	-0.0319196	-0.0318684	-0.0316815	-0.0314355	-0.0313128	-0.0310839
-0.0405746	-0.0404854	-0.040417	-0.0404111	-0.0396914	-0.0392037	-0.0386365	-0.0385066	-0.0384138	-0.0383513	-0.0380615	-0.0375522	-0.0374112	-0.0364591	-0.0363777	-0.0363176	-0.0362624	-0.0359227	-0.035625	-0.0354306	-0.035407	-0.0353883	-0.0351822	-0.0347299	-0.0347276	-0.0346562	-0.0346175	-0.0344593	-0.0338106	-0.0337704	-0.0337144	-0.03355	-0.0333096	-0.0332743	-0.0332319	-0.0329095	-0.0325919	-0.0325695	-0.032517	-0.0323284	-0.03223	-0.0321177	-0.0320905	-0.0319524	-0.031922	-0.0318708	-0.0316839	-0.0314379	-0.0313152	-0.0310863
-0.0405879	-0.0404987	-0.0404302	-0.0404244	-0.0397044	-0.0392165	-0.0386491	-0.0385193	-0.0384264	-0.0383639	-0.038074	-0.0375646	-0.0374235	-0.036471	-0.0363896	-0.0363295	-0.0362743	-0.0359345	-0.0356367	-0.0354423	-0.0354186	-0.0353999	-0.0351938	-0.0347413	-0.034739	-0.0346676	-0.0346289	-0.0344706	-0.0338217	-0.0337815	-0.0337254	-0.033561	-0.0333206	-0.0332852	-0.0332428	-0.0329203	-0.0326026	-0.0325802	-0.0325277	-0.032339	-0.0322405	-0.0321282	-0.0321011	-0.0319629	-0.0319325	-0.0318813	-0.0316943	-0.0314483	-0.0313255	-0.0310965
-0.0405954	-0.0405063	-0.0404378	-0.0404319	-0.0397118	-0.0392238	-0.0386563	-0.0385264	-0.0384336	-0.038371	-0.0380811	-0.0375715	-0.0374304	-0.0364778	-0.0363964	-0.0363363	-0.0362811	-0.0359412	-0.0356433	-0.0354489	-0.0354252	-0.0354065	-0.0352003	-0.0347478	-0.0347455	-0.0346741	-0.0346353	-0.034477	-0.033828	-0.0337877	-0.0337317	-0.0335672	-0.0333268	-0.0332914	-0.033249	-0.0329264	-0.0326086	-0.0325863	-0.0325338	-0.0323451	-0.0322465	-0.0321342	-0.032107	-0.0319689	-0.0319384	-0.0318872	-0.0317002	-0.0314541	-0.0313313	-0.0311023
-0.0406074	-0.0405182	-0.0404497	-0.0404438	-0.0397235	-0.0392354	-0.0386677	-0.0385378	-0.0384449	-0.0383823	-0.0380923	-0.0375826	-0.0374414	-0.0364886	-0.0364071	-0.036347	-0.0362917	-0.0359518	-0.0356538	-0.0354593	-0.0354357	-0.0354169	-0.0352107	-0.034758	-0.0347557	-0.0346843	-0.0346455	-0.0344872	-0.033838	-0.0337977	-0.0337417	-0.0335771	-0.0333366	-0.0333012	-0.0332588	-0.0329361	-0.0326182	-0.0325959	-0.0325433	-0.0323546	-0.032256	-0.0321436	-0.0321165	-0.0319783	-0.0319478	-0.0318966	-0.0317095	-0.0314634	-0.0313406	-0.0311114
-0.0406191	-0.0405299	-0.0404613	-0.0404555	-0.0397349	-0.0392467	-0.0386788	-0.0385489	-0.038456	-0.0383934	-0.0381032	-0.0375934	-0.0374522	-0.0364991	-0.0364176	-0.0363574	-0.0363022	-0.0359621	-0.0356641	-0.0354695	-0.0354459	-0.0354271	-0.0352208	-0.034768	-0.0347657	-0.0346943	-0.0346555	-0.0344971	-0.0338477	-0.0338074	-0.0337514	-0.0335868	-0.0333462	-0.0333108	-0.0332684	-0.0329456	-0.0326276	-0.0326052	-0.0325527	-0.0323639	-0.0322653	-0.0321529	-0.0321257	-0.0319875	-0.031957	-0.0319058	-0.0317187	-0.0314724	-0.0313496	-0.0311204
-0.0406379	-0.0405486	-0.04048	-0.0404742	-0.0397533	-0.0392648	-0.0386967	-0.0385667	-0.0384737	-0.0384111	-0.0381209	-0.0376108	-0.0374695	-0.0365159	-0.0364344	-0.0363742	-0.036319	-0.0359788	-0.0356805	-0.0354859	-0.0354622	-0.0354435	-0.0352371	-0.0347841	-0.0347818	-0.0347103	-0.0346715	-0.034513	-0.0338634	-0.033823	-0.033767	-0.0336023	-0.0333616	-0.0333262	-0.0332838	-0.0329608	-0.0326427	-0.0326203	-0.0325678	-0.0323789	-0.0322802	-0.0321678	-0.0321406	-0.0320023	-0.0319718	-0.0319205	-0.0317333	-0.031487	-0.0313641	-0.0311348
-0.0406433	-0.040554	-0.0404854	-0.0404796	-0.0397586	-0.0392701	-0.0387019	-0.0385718	-0.0384789	-0.0384162	-0.0381259	-0.0376158	-0.0374745	-0.0365208	-0.0364393	-0.0363791	-0.0363238	-0.0359836	-0.0356853	-0.0354906	-0.035467	-0.0354482	-0.0352418	-0.0347887	-0.0347865	-0.0347149	-0.0346761	-0.0345176	-0.0338679	-0.0338276	-0.0337715	-0.0336068	-0.033366	-0.0333306	-0.0332882	-0.0329652	-0.0326471	-0.0326247	-0.0325721	-0.0323832	-0.0322845	-0.0321721	-0.0321449	-0.0320065	-0.031976	-0.0319248	-0.0317376	-0.0314912	-0.0313683	-0.0311389
-0.0406481	-0.0405588	-0.0404902	-0.0404844	-0.0397633	-0.0392747	-0.0387065	-0.0385764	-0.0384834	-0.0384208	-0.0381305	-0.0376203	-0.037479	-0.0365252	-0.0364436	-0.0363834	-0.0363281	-0.0359878	-0.0356895	-0.0354949	-0.0354712	-0.0354524	-0.035246	-0.0347929	-0.0347906	-0.034719	-0.0346802	-0.0345217	-0.0338719	-0.0338316	-0.0337755	-0.0336108	-0.03337	-0.0333346	-0.0332921	-0.0329691	-0.0326509	-0.0326285	-0.032576	-0.032387	-0.0322884	-0.0321759	-0.0321487	-0.0320103	-0.0319798	-0.0319285	-0.0317413	-0.0314949	-0.031372	-0.0311426
-0.040653	-0.0405637	-0.0404951	-0.0404892	-0.0397681	-0.0392794	-0.0387111	-0.038581	-0.038488	-0.0384254	-0.038135	-0.0376248	-0.0374835	-0.0365295	-0.036448	-0.0363878	-0.0363325	-0.0359921	-0.0356938	-0.0354991	-0.0354754	-0.0354566	-0.0352502	-0.034797	-0.0347947	-0.0347232	-0.0346844	-0.0345259	-0.033876	-0.0338356	-0.0337795	-0.0336148	-0.033374	-0.0333386	-0.0332961	-0.0329731	-0.0326549	-0.0326324	-0.0325799	-0.0323909	-0.0322922	-0.0321797	-0.0321525	-0.0320142	-0.0319837	-0.0319324	-0.0317451	-0.0314987	-0.0313757	-0.0311463
-0.0406636	-0.0405743	-0.0405056	-0.0404998	-0.0397785	-0.0392897	-0.0387212	-0.0385911	-0.0384981	-0.0384354	-0.038145	-0.0376346	-0.0374932	-0.0365391	-0.0364575	-0.0363973	-0.0363419	-0.0360015	-0.0357031	-0.0355084	-0.0354847	-0.0354659	-0.0352594	-0.0348061	-0.0348038	-0.0347323	-0.0346934	-0.0345349	-0.0338848	-0.0338444	-0.0337883	-0.0336236	-0.0333827	-0.0333473	-0.0333048	-0.0329817	-0.0326634	-0.032641	-0.0325884	-0.0323993	-0.0323007	-0.0321881	-0.0321609	-0.0320225	-0.031992	-0.0319407	-0.0317534	-0.0315069	-0.0313839	-0.0311545
-0.0406668	-0.0405775	-0.0405088	-0.040503	-0.0397816	-0.0392928	-0.0387243	-0.0385941	-0.0385011	-0.0384384	-0.038148	-0.0376376	-0.0374962	-0.0365419	-0.0364603	-0.0364001	-0.0363448	-0.0360044	-0.0357059	-0.0355112	-0.0354875	-0.0354687	-0.0352622	-0.0348089	-0.0348066	-0.034735	-0.0346962	-0.0345376	-0.0338875	-0.0338471	-0.033791	-0.0336262	-0.0333853	-0.0333499	-0.0333074	-0.0329843	-0.0326659	-0.0326435	-0.0325909	-0.0324019	-0.0323032	-0.0321907	-0.0321635	-0.032025	-0.0319945	-0.0319432	-0.0317559	-0.0315094	-0.0313864	-0.0311569
-0.0406738	-0.0405844	-0.0405158	-0.0405099	-0.0397884	-0.0392995	-0.0387309	-0.0386007	-0.0385077	-0.038445	-0.0381545	-0.037644	-0.0375026	-0.0365482	-0.0364666	-0.0364064	-0.036351	-0.0360105	-0.035712	-0.0355172	-0.0354936	-0.0354748	-0.0352682	-0.0348148	-0.0348125	-0.034741	-0.0347021	-0.0345435	-0.0338933	-0.0338529	-0.0337968	-0.033632	-0.033391	-0.0333556	-0.0333131	-0.0329899	-0.0326715	-0.0326491	-0.0325965	-0.0324075	-0.0323087	-0.0321962	-0.032169	-0.0320305	-0.032	-0.0319487	-0.0317613	-0.0315148	-0.0313918	-0.0311623
-0.0406791	-0.0405898	-0.0405211	-0.0405152	-0.0397937	-0.0393047	-0.038736	-0.0386058	-0.0385128	-0.0384501	-0.0381595	-0.037649	-0.0375076	-0.036553	-0.0364714	-0.0364112	-0.0363558	-0.0360153	-0.0357168	-0.0355219	-0.0354982	-0.0354794	-0.0352729	-0.0348194	-0.0348171	-0.0347455	-0.0347067	-0.0345481	-0.0338977	-0.0338574	-0.0338012	-0.0336364	-0.0333954	-0.03336	-0.0333175	-0.0329943	-0.0326758	-0.0326534	-0.0326008	-0.0324117	-0.032313	-0.0322004	-0.0321732	-0.0320348	-0.0320042	-0.0319529	-0.0317655	-0.0315189	-0.0313959	-0.0311664
-0.0406804	-0.0405911	-0.0405224	-0.0405166	-0.039795	-0.039306	-0.0387373	-0.0386071	-0.038514	-0.0384514	-0.0381608	-0.0376502	-0.0375088	-0.0365542	-0.0364726	-0.0364124	-0.036357	-0.0360165	-0.0357179	-0.0355231	-0.0354994	-0.0354806	-0.035274	-0.0348205	-0.0348183	-0.0347467	-0.0347078	-0.0345492	-0.0338988	-0.0338585	-0.0338023	-0.0336375	-0.0333965	-0.0333611	-0.0333186	-0.0329953	-0.0326769	-0.0326545	-0.0326019	-0.0324128	-0.0323141	-0.0322015	-0.0321743	-0.0320358	-0.0320053	-0.0319539	-0.0317666	-0.03152	-0.0313969	-0.0311674
-0.0406875	-0.0405982	-0.0405295	-0.0405236	-0.0398019	-0.0393128	-0.038744	-0.0386138	-0.0385208	-0.0384581	-0.0381674	-0.0376568	-0.0375153	-0.0365606	-0.036479	-0.0364187	-0.0363634	-0.0360227	-0.0357241	-0.0355293	-0.0355056	-0.0354868	-0.0352802	-0.0348266	-0.0348243	-0.0347527	-0.0347139	-0.0345552	-0.0339048	-0.0338644	-0.0338082	-0.0336434	-0.0334024	-0.0333669	-0.0333244	-0.0330011	-0.0326826	-0.0326602	-0.0326076	-0.0324184	-0.0323197	-0.0322071	-0.0321799	-0.0320414	-0.0320109	-0.0319595	-0.0317721	-0.0315255	-0.0314024	-0.0311728
-0.040693	-0.0406036	-0.040535	-0.0405291	-0.0398073	-0.0393181	-0.0387492	-0.038619	-0.038526	-0.0384632	-0.0381726	-0.0376619	-0.0375204	-0.0365655	-0.0364839	-0.0364236	-0.0363683	-0.0360276	-0.035729	-0.0355341	-0.0355104	-0.0354916	-0.035285	-0.0348313	-0.034829	-0.0347574	-0.0347186	-0.0345599	-0.0339093	-0.033869	-0.0338128	-0.0336479	-0.0334069	-0.0333714	-0.0333289	-0.0330055	-0.032687	-0.0326646	-0.032612	-0.0324228	-0.0323241	-0.0322114	-0.0321842	-0.0320457	-0.0320152	-0.0319638	-0.0317764	-0.0315297	-0.0314067	-0.031177
-0.0406954	-0.040606	-0.0405373	-0.0405314	-0.0398096	-0.0393204	-0.0387515	-0.0386213	-0.0385282	-0.0384655	-0.0381748	-0.037664	-0.0375226	-0.0365676	-0.036486	-0.0364257	-0.0363704	-0.0360297	-0.035731	-0.0355361	-0.0355124	-0.0354936	-0.035287	-0.0348333	-0.034831	-0.0347594	-0.0347206	-0.0345619	-0.0339113	-0.0338709	-0.0338148	-0.0336499	-0.0334088	-0.0333733	-0.0333309	-0.0330075	-0.0326889	-0.0326665	-0.0326138	-0.0324247	-0.0323259	-0.0322133	-0.0321861	-0.0320476	-0.032017	-0.0319657	-0.0317782	-0.0315315	-0.0314085	-0.0311788
-0.0406991	-0.0406097	-0.040541	-0.0405352	-0.0398132	-0.039324	-0.038755	-0.0386248	-0.0385317	-0.038469	-0.0381783	-0.0376675	-0.037526	-0.036571	-0.0364893	-0.0364291	-0.0363737	-0.036033	-0.0357343	-0.0355394	-0.0355157	-0.0354969	-0.0352902	-0.0348365	-0.0348342	-0.0347626	-0.0347238	-0.034565	-0.0339144	-0.033874	-0.0338179	-0.033653	-0.0334119	-0.0333764	-0.0333339	-0.0330105	-0.0326919	-0.0326695	-0.0326168	-0.0324277	-0.0323289	-0.0322162	-0.032189	-0.0320505	-0.03202	-0.0319686	-0.0317812	-0.0315344	-0.0314114	-0.0311817
-0.0407022	-0.0406128	-0.0405441	-0.0405382	-0.0398162	-0.039327	-0.038758	-0.0386277	-0.0385346	-0.0384719	-0.0381812	-0.0376703	-0.0375288	-0.0365738	-0.0364921	-0.0364318	-0.0363765	-0.0360357	-0.035737	-0.0355421	-0.0355184	-0.0354996	-0.0352929	-0.0348392	-0.0348369	-0.0347652	-0.0347264	-0.0345677	-0.033917	-0.0338766	-0.0338204	-0.0336555	-0.0334144	-0.0333789	-0.0333364	-0.033013	-0.0326944	-0.032672	-0.0326193	-0.0324301	-0.0323313	-0.0322187	-0.0321915	-0.0320529	-0.0320224	-0.031971	-0.0317836	-0.0315368	-0.0314137	-0.031184
-0.0407084	-0.040619	-0.0405503	-0.0405444	-0.0398223	-0.039333	-0.0387639	-0.0386336	-0.0385405	-0.0384778	-0.038187	-0.0376761	-0.0375345	-0.0365793	-0.0364976	-0.0364374	-0.036382	-0.0360412	-0.0357424	-0.0355475	-0.0355238	-0.035505	-0.0352983	-0.0348445	-0.0348422	-0.0347705	-0.0347317	-0.0345729	-0.0339221	-0.0338817	-0.0338256	-0.0336606	-0.0334195	-0.033384	-0.0333415	-0.033018	-0.0326994	-0.0326769	-0.0326243	-0.032435	-0.0323362	-0.0322236	-0.0321964	-0.0320578	-0.0320273	-0.0319759	-0.0317884	-0.0315416	-0.0314185	-0.0311888
-0.0407179	-0.0406285	-0.0405598	-0.0405539	-0.0398316	-0.0393422	-0.038773	-0.0386427	-0.0385495	-0.0384868	-0.038196	-0.0376849	-0.0375434	-0.0365879	-0.0365062	-0.0364459	-0.0363905	-0.0360496	-0.0357508	-0.0355558	-0.0355321	-0.0355133	-0.0353066	-0.0348526	-0.0348503	-0.0347787	-0.0347398	-0.034581	-0.0339301	-0.0338897	-0.0338335	-0.0336685	-0.0334273	-0.0333918	-0.0333493	-0.0330257	-0.032707	-0.0326846	-0.0326319	-0.0324427	-0.0323438	-0.0322311	-0.0322039	-0.0320653	-0.0320348	-0.0319834	-0.0317958	-0.031549	-0.0314259	-0.0311961
-0.040727	-0.0406375	-0.0405688	-0.0405629	-0.0398405	-0.0393509	-0.0387815	-0.0386512	-0.0385581	-0.0384953	-0.0382044	-0.0376933	-0.0375517	-0.036596	-0.0365143	-0.036454	-0.0363986	-0.0360576	-0.0357588	-0.0355637	-0.03554	-0.0355212	-0.0353144	-0.0348604	-0.0348581	-0.0347864	-0.0347475	-0.0345887	-0.0339376	-0.0338972	-0.033841	-0.033676	-0.0334347	-0.0333992	-0.0333567	-0.0330331	-0.0327143	-0.0326918	-0.0326391	-0.0324498	-0.032351	-0.0322383	-0.0322111	-0.0320724	-0.0320419	-0.0319905	-0.0318029	-0.031556	-0.0314328	-0.031203
-0.0407329	-0.0406434	-0.0405746	-0.0405688	-0.0398462	-0.0393566	-0.0387872	-0.0386568	-0.0385637	-0.0385009	-0.03821	-0.0376987	-0.0375571	-0.0366013	-0.0365196	-0.0364593	-0.0364039	-0.0360629	-0.0357639	-0.0355689	-0.0355451	-0.0355263	-0.0353195	-0.0348654	-0.0348631	-0.0347914	-0.0347526	-0.0345937	-0.0339425	-0.0339021	-0.0338459	-0.0336809	-0.0334396	-0.0334041	-0.0333616	-0.0330379	-0.032719	-0.0326966	-0.0326439	-0.0324546	-0.0323557	-0.032243	-0.0322157	-0.0320771	-0.0320465	-0.0319951	-0.0318075	-0.0315606	-0.0314374	-0.0312075
-0.0407409	-0.0406514	-0.0405826	-0.0405768	-0.0398541	-0.0393644	-0.0387948	-0.0386645	-0.0385713	-0.0385085	-0.0382175	-0.0377062	-0.0375645	-0.0366085	-0.0365268	-0.0364665	-0.036411	-0.03607	-0.035771	-0.0355759	-0.0355522	-0.0355333	-0.0353265	-0.0348723	-0.03487	-0.0347983	-0.0347594	-0.0346005	-0.0339492	-0.0339088	-0.0338526	-0.0336875	-0.0334462	-0.0334107	-0.0333681	-0.0330444	-0.0327255	-0.032703	-0.0326503	-0.0324609	-0.0323621	-0.0322493	-0.0322221	-0.0320834	-0.0320528	-0.0320014	-0.0318138	-0.0315668	-0.0314436	-0.0312137
-0.0407749	-0.0406853	-0.0406165	-0.0406106	-0.0398873	-0.0393972	-0.0388272	-0.0386967	-0.0386034	-0.0385406	-0.0382494	-0.0377376	-0.0375959	-0.0366391	-0.0365572	-0.0364969	-0.0364414	-0.0361001	-0.0358008	-0.0356055	-0.0355818	-0.035563	-0.0353559	-0.0349014	-0.0348991	-0.0348273	-0.0347884	-0.0346294	-0.0339775	-0.0339371	-0.0338808	-0.0337156	-0.0334741	-0.0334385	-0.033396	-0.0330719	-0.0327528	-0.0327303	-0.0326775	-0.032488	-0.0323891	-0.0322762	-0.0322489	-0.0321102	-0.0320796	-0.0320281	-0.0318403	-0.0315931	-0.0314698	-0.0312397
-0.040778	-0.0406885	-0.0406197	-0.0406138	-0.0398904	-0.0394003	-0.0388302	-0.0386997	-0.0386065	-0.0385436	-0.0382523	-0.0377405	-0.0375988	-0.0366419	-0.0365601	-0.0364997	-0.0364442	-0.0361029	-0.0358036	-0.0356083	-0.0355846	-0.0355657	-0.0353587	-0.0349041	-0.0349018	-0.03483	-0.0347911	-0.0346321	-0.0339802	-0.0339397	-0.0338834	-0.0337182	-0.0334767	-0.0334411	-0.0333986	-0.0330745	-0.0327553	-0.0327328	-0.0326801	-0.0324905	-0.0323916	-0.0322787	-0.0322515	-0.0321127	-0.0320821	-0.0320306	-0.0318428	-0.0315956	-0.0314723	-0.0312422
-0.0407888	-0.0406992	-0.0406304	-0.0406245	-0.039901	-0.0394107	-0.0388405	-0.0387099	-0.0386167	-0.0385538	-0.0382625	-0.0377505	-0.0376087	-0.0366516	-0.0365698	-0.0365094	-0.0364539	-0.0361124	-0.0358131	-0.0356177	-0.035594	-0.0355751	-0.035368	-0.0349133	-0.034911	-0.0348392	-0.0348003	-0.0346412	-0.0339891	-0.0339487	-0.0338924	-0.0337271	-0.0334855	-0.03345	-0.0334074	-0.0330832	-0.032764	-0.0327415	-0.0326887	-0.0324991	-0.0324001	-0.0322872	-0.03226	-0.0321211	-0.0320905	-0.0320391	-0.0318512	-0.0316039	-0.0314806	-0.0312504
-0.0407913	-0.0407017	-0.0406329	-0.040627	-0.0399034	-0.0394131	-0.0388428	-0.0387123	-0.038619	-0.0385561	-0.0382648	-0.0377528	-0.037611	-0.0366538	-0.036572	-0.0365116	-0.0364561	-0.0361146	-0.0358153	-0.0356199	-0.0355961	-0.0355773	-0.0353702	-0.0349154	-0.0349131	-0.0348414	-0.0348024	-0.0346433	-0.0339912	-0.0339508	-0.0338945	-0.0337292	-0.0334876	-0.033452	-0.0334094	-0.0330853	-0.032766	-0.0327435	-0.0326907	-0.0325011	-0.0324021	-0.0322892	-0.0322619	-0.0321231	-0.0320925	-0.032041	-0.0318531	-0.0316059	-0.0314825	-0.0312523
-0.0407951	-0.0407055	-0.0406366	-0.0406307	-0.0399071	-0.0394167	-0.0388464	-0.0387159	-0.0386226	-0.0385597	-0.0382683	-0.0377563	-0.0376145	-0.0366572	-0.0365754	-0.036515	-0.0364595	-0.0361179	-0.0358186	-0.0356232	-0.0355994	-0.0355806	-0.0353734	-0.0349187	-0.0349164	-0.0348446	-0.0348056	-0.0346466	-0.0339944	-0.0339539	-0.0338976	-0.0337323	-0.0334906	-0.0334551	-0.0334125	-0.0330883	-0.032769	-0.0327465	-0.0326937	-0.0325041	-0.0324051	-0.0322922	-0.0322649	-0.0321261	-0.0320955	-0.032044	-0.0318561	-0.0316088	-0.0314854	-0.0312552
-0.0408001	-0.0407105	-0.0406416	-0.0406357	-0.039912	-0.0394216	-0.0388512	-0.0387206	-0.0386273	-0.0385644	-0.038273	-0.0377609	-0.0376191	-0.0366617	-0.0365798	-0.0365194	-0.0364639	-0.0361224	-0.035823	-0.0356276	-0.0356038	-0.0355849	-0.0353778	-0.0349229	-0.0349206	-0.0348488	-0.0348099	-0.0346508	-0.0339985	-0.0339581	-0.0339018	-0.0337364	-0.0334947	-0.0334592	-0.0334166	-0.0330924	-0.032773	-0.0327505	-0.0326977	-0.0325081	-0.0324091	-0.0322962	-0.0322689	-0.03213	-0.0320994	-0.0320479	-0.03186	-0.0316127	-0.0314893	-0.031259
-0.040811	-0.0407213	-0.0406525	-0.0406466	-0.0399227	-0.0394321	-0.0388616	-0.038731	-0.0386376	-0.0385747	-0.0382833	-0.037771	-0.0376292	-0.0366715	-0.0365896	-0.0365292	-0.0364737	-0.036132	-0.0358325	-0.0356371	-0.0356133	-0.0355945	-0.0353872	-0.0349323	-0.03493	-0.0348582	-0.0348192	-0.0346601	-0.0340076	-0.0339671	-0.0339108	-0.0337455	-0.0335037	-0.0334681	-0.0334255	-0.0331012	-0.0327818	-0.0327593	-0.0327065	-0.0325168	-0.0324178	-0.0323048	-0.0322775	-0.0321386	-0.032108	-0.0320565	-0.0318685	-0.0316211	-0.0314977	-0.0312674
-0.0408121	-0.0407225	-0.0406536	-0.0406477	-0.0399238	-0.0394332	-0.0388627	-0.0387321	-0.0386387	-0.0385758	-0.0382843	-0.0377721	-0.0376302	-0.0366726	-0.0365907	-0.0365302	-0.0364747	-0.0361331	-0.0358336	-0.0356381	-0.0356143	-0.0355955	-0.0353882	-0.0349333	-0.034931	-0.0348592	-0.0348202	-0.034661	-0.0340086	-0.0339681	-0.0339118	-0.0337464	-0.0335047	-0.0334691	-0.0334265	-0.0331022	-0.0327827	-0.0327602	-0.0327074	-0.0325177	-0.0324187	-0.0323057	-0.0322784	-0.0321395	-0.0321089	-0.0320574	-0.0318694	-0.031622	-0.0314986	-0.0312683
-0.0408232	-0.0407335	-0.0406646	-0.0406588	-0.0399346	-0.0394439	-0.0388732	-0.0387426	-0.0386492	-0.0385863	-0.0382947	-0.0377824	-0.0376404	-0.0366825	-0.0366006	-0.0365402	-0.0364846	-0.0361429	-0.0358433	-0.0356478	-0.035624	-0.0356051	-0.0353978	-0.0349428	-0.0349405	-0.0348686	-0.0348296	-0.0346704	-0.0340178	-0.0339773	-0.033921	-0.0337556	-0.0335137	-0.0334782	-0.0334356	-0.0331111	-0.0327916	-0.0327691	-0.0327163	-0.0325265	-0.0324275	-0.0323145	-0.0322872	-0.0321482	-0.0321176	-0.0320661	-0.0318781	-0.0316306	-0.0315071	-0.0312768
-0.0408305	-0.0407408	-0.0406719	-0.040666	-0.0399418	-0.039451	-0.0388802	-0.0387495	-0.0386561	-0.0385932	-0.0383016	-0.0377891	-0.0376472	-0.0366891	-0.0366071	-0.0365467	-0.0364911	-0.0361493	-0.0358497	-0.0356541	-0.0356304	-0.0356115	-0.0354042	-0.034949	-0.0349467	-0.0348748	-0.0348359	-0.0346766	-0.0340239	-0.0339834	-0.033927	-0.0337616	-0.0335197	-0.0334841	-0.0334415	-0.0331171	-0.0327975	-0.032775	-0.0327221	-0.0325323	-0.0324333	-0.0323203	-0.032293	-0.032154	-0.0321233	-0.0320718	-0.0318838	-0.0316362	-0.0315128	-0.0312824
-0.0408648	-0.040775	-0.040706	-0.0407001	-0.0399753	-0.0394841	-0.0389128	-0.038782	-0.0386886	-0.0386256	-0.0383337	-0.0378208	-0.0376787	-0.0367198	-0.0366378	-0.0365773	-0.0365218	-0.0361796	-0.0358798	-0.035684	-0.0356603	-0.0356414	-0.0354339	-0.0349783	-0.034976	-0.0349041	-0.0348651	-0.0347057	-0.0340524	-0.0340119	-0.0339555	-0.0337899	-0.0335479	-0.0335123	-0.0334696	-0.0331448	-0.032825	-0.0328025	-0.0327496	-0.0325596	-0.0324605	-0.0323474	-0.0323201	-0.032181	-0.0321503	-0.0320987	-0.0319105	-0.0316628	-0.0315392	-0.0313086
-0.0408688	-0.040779	-0.0407101	-0.0407042	-0.0399792	-0.039488	-0.0389166	-0.0387859	-0.0386924	-0.0386294	-0.0383375	-0.0378246	-0.0376825	-0.0367235	-0.0366415	-0.036581	-0.0365254	-0.0361832	-0.0358833	-0.0356876	-0.0356638	-0.0356449	-0.0354374	-0.0349818	-0.0349795	-0.0349076	-0.0348685	-0.0347092	-0.0340558	-0.0340153	-0.0339589	-0.0337933	-0.0335512	-0.0335156	-0.0334729	-0.0331481	-0.0328282	-0.0328057	-0.0327528	-0.0325629	-0.0324637	-0.0323506	-0.0323233	-0.0321842	-0.0321535	-0.0321019	-0.0319137	-0.0316659	-0.0315423	-0.0313117
-0.0408726	-0.0407828	-0.0407138	-0.0407079	-0.0399829	-0.0394916	-0.0389202	-0.0387894	-0.0386959	-0.0386329	-0.038341	-0.037828	-0.0376859	-0.0367268	-0.0366448	-0.0365843	-0.0365287	-0.0361865	-0.0358866	-0.0356908	-0.035667	-0.0356482	-0.0354406	-0.034985	-0.0349827	-0.0349107	-0.0348717	-0.0347123	-0.0340589	-0.0340184	-0.033962	-0.0337964	-0.0335542	-0.0335186	-0.033476	-0.0331512	-0.0328312	-0.0328087	-0.0327558	-0.0325658	-0.0324667	-0.0323535	-0.0323262	-0.0321871	-0.0321564	-0.0321048	-0.0319166	-0.0316688	-0.0315452	-0.0313146
-0.0408837	-0.0407939	-0.0407249	-0.040719	-0.0399938	-0.0395024	-0.0389308	-0.0388	-0.0387065	-0.0386435	-0.0383515	-0.0378384	-0.0376962	-0.0367369	-0.0366549	-0.0365943	-0.0365387	-0.0361964	-0.0358964	-0.0357006	-0.0356768	-0.0356579	-0.0354503	-0.0349946	-0.0349923	-0.0349203	-0.0348813	-0.0347219	-0.0340683	-0.0340277	-0.0339713	-0.0338056	-0.0335634	-0.0335278	-0.0334851	-0.0331602	-0.0328402	-0.0328177	-0.0327648	-0.0325748	-0.0324755	-0.0323624	-0.0323351	-0.0321959	-0.0321652	-0.0321136	-0.0319253	-0.0316775	-0.0315539	-0.0313231
-0.0409027	-0.0408128	-0.0407438	-0.0407379	-0.0400124	-0.0395207	-0.0389489	-0.038818	-0.0387245	-0.0386614	-0.0383693	-0.0378559	-0.0377137	-0.0367539	-0.0366719	-0.0366113	-0.0365556	-0.0362132	-0.0359131	-0.0357172	-0.0356933	-0.0356744	-0.0354668	-0.0350108	-0.0350085	-0.0349365	-0.0348974	-0.0347379	-0.034084	-0.0340435	-0.033987	-0.0338213	-0.033579	-0.0335433	-0.0335007	-0.0331756	-0.0328554	-0.0328329	-0.03278	-0.0325899	-0.0324906	-0.0323774	-0.03235	-0.0322108	-0.0321801	-0.0321285	-0.0319401	-0.0316922	-0.0315685	-0.0313377
-0.0409237	-0.0408339	-0.0407648	-0.0407589	-0.040033	-0.0395411	-0.0389689	-0.038838	-0.0387444	-0.0386813	-0.038389	-0.0378754	-0.0377331	-0.0367728	-0.0366907	-0.0366301	-0.0365745	-0.0362319	-0.0359315	-0.0357355	-0.0357117	-0.0356928	-0.035485	-0.0350288	-0.0350265	-0.0349545	-0.0349154	-0.0347558	-0.0341016	-0.034061	-0.0340045	-0.0338387	-0.0335963	-0.0335606	-0.0335179	-0.0331927	-0.0328723	-0.0328498	-0.0327969	-0.0326066	-0.0325073	-0.0323941	-0.0323667	-0.0322274	-0.0321967	-0.0321451	-0.0319566	-0.0317085	-0.0315847	-0.0313538
-0.0409278	-0.0408379	-0.0407688	-0.0407629	-0.0400369	-0.0395449	-0.0389728	-0.0388418	-0.0387482	-0.0386851	-0.0383928	-0.0378791	-0.0377368	-0.0367764	-0.0366943	-0.0366337	-0.036578	-0.0362354	-0.0359351	-0.035739	-0.0357152	-0.0356963	-0.0354885	-0.0350322	-0.0350299	-0.0349579	-0.0349188	-0.0347592	-0.0341049	-0.0340643	-0.0340078	-0.033842	-0.0335996	-0.0335639	-0.0335212	-0.0331959	-0.0328756	-0.032853	-0.0328001	-0.0326098	-0.0325105	-0.0323972	-0.0323699	-0.0322306	-0.0321999	-0.0321482	-0.0319597	-0.0317116	-0.0315878	-0.0313569
-0.0409385	-0.0408485	-0.0407795	-0.0407735	-0.0400474	-0.0395553	-0.038983	-0.038852	-0.0387583	-0.0386952	-0.0384028	-0.037889	-0.0377467	-0.0367861	-0.0367039	-0.0366433	-0.0365876	-0.0362449	-0.0359445	-0.0357484	-0.0357246	-0.0357056	-0.0354978	-0.0350414	-0.0350391	-0.034967	-0.034928	-0.0347683	-0.0341139	-0.0340732	-0.0340167	-0.0338509	-0.0336084	-0.0335727	-0.03353	-0.0332046	-0.0328842	-0.0328616	-0.0328087	-0.0326184	-0.032519	-0.0324057	-0.0323783	-0.032239	-0.0322083	-0.0321566	-0.0319681	-0.0317199	-0.0315961	-0.0313651
-0.04095	-0.04086	-0.0407909	-0.040785	-0.0400586	-0.0395664	-0.0389939	-0.0388629	-0.0387692	-0.0387061	-0.0384136	-0.0378997	-0.0377573	-0.0367964	-0.0367142	-0.0366536	-0.0365979	-0.0362551	-0.0359546	-0.0357584	-0.0357346	-0.0357157	-0.0355078	-0.0350512	-0.0350489	-0.0349769	-0.0349378	-0.0347781	-0.0341234	-0.0340828	-0.0340263	-0.0338604	-0.0336178	-0.0335821	-0.0335394	-0.0332139	-0.0328934	-0.0328708	-0.0328179	-0.0326275	-0.0325282	-0.0324148	-0.0323874	-0.0322481	-0.0322173	-0.0321657	-0.031977	-0.0317288	-0.031605	-0.0313739
-0.0409628	-0.0408728	-0.0408037	-0.0407978	-0.0400712	-0.0395788	-0.0390061	-0.0388751	-0.0387814	-0.0387182	-0.0384257	-0.0379115	-0.0377691	-0.0368079	-0.0367257	-0.0366651	-0.0366094	-0.0362664	-0.0359658	-0.0357696	-0.0357458	-0.0357269	-0.0355189	-0.0350622	-0.0350599	-0.0349878	-0.0349487	-0.034789	-0.0341341	-0.0340935	-0.034037	-0.033871	-0.0336283	-0.0335926	-0.0335499	-0.0332243	-0.0329037	-0.0328811	-0.0328282	-0.0326377	-0.0325383	-0.032425	-0.0323976	-0.0322581	-0.0322274	-0.0321757	-0.0319871	-0.0317387	-0.0316149	-0.0313837
-0.0409664	-0.0408764	-0.0408073	-0.0408014	-0.0400747	-0.0395823	-0.0390096	-0.0388785	-0.0387848	-0.0387217	-0.0384291	-0.0379149	-0.0377725	-0.0368112	-0.036729	-0.0366683	-0.0366126	-0.0362697	-0.035969	-0.0357728	-0.035749	-0.03573	-0.035522	-0.0350653	-0.035063	-0.0349909	-0.0349518	-0.0347921	-0.0341372	-0.0340965	-0.03404	-0.033874	-0.0336313	-0.0335956	-0.0335529	-0.0332273	-0.0329066	-0.0328841	-0.0328311	-0.0326406	-0.0325412	-0.0324278	-0.0324005	-0.032261	-0.0322303	-0.0321786	-0.0319899	-0.0317416	-0.0316177	-0.0313865
-0.040985	-0.040895	-0.0408258	-0.0408199	-0.0400929	-0.0396002	-0.0390273	-0.0388961	-0.0388024	-0.0387392	-0.0384465	-0.0379321	-0.0377896	-0.0368279	-0.0367456	-0.036685	-0.0366292	-0.0362861	-0.0359853	-0.035789	-0.0357652	-0.0357462	-0.0355381	-0.0350812	-0.0350789	-0.0350068	-0.0349677	-0.0348078	-0.0341526	-0.034112	-0.0340554	-0.0338893	-0.0336466	-0.0336108	-0.0335681	-0.0332424	-0.0329215	-0.032899	-0.0328459	-0.0326554	-0.032556	-0.0324425	-0.0324151	-0.0322756	-0.0322449	-0.0321932	-0.0320044	-0.0317559	-0.031632	-0.0314007
-0.0409962	-0.0409061	-0.040837	-0.040831	-0.0401038	-0.039611	-0.0390379	-0.0389067	-0.038813	-0.0387498	-0.038457	-0.0379424	-0.0377999	-0.0368379	-0.0367557	-0.036695	-0.0366392	-0.036296	-0.0359952	-0.0357988	-0.0357749	-0.035756	-0.0355478	-0.0350908	-0.0350885	-0.0350164	-0.0349772	-0.0348173	-0.034162	-0.0341213	-0.0340647	-0.0338986	-0.0336557	-0.03362	-0.0335772	-0.0332514	-0.0329305	-0.0329079	-0.0328549	-0.0326644	-0.0325649	-0.0324514	-0.032424	-0.0322845	-0.0322537	-0.032202	-0.0320131	-0.0317646	-0.0316406	-0.0314093
-0.0410133	-0.0409233	-0.040854	-0.0408481	-0.0401206	-0.0396276	-0.0390543	-0.038923	-0.0388292	-0.038766	-0.0384731	-0.0379583	-0.0378157	-0.0368533	-0.0367711	-0.0367103	-0.0366545	-0.0363112	-0.0360102	-0.0358138	-0.0357899	-0.035771	-0.0355627	-0.0351055	-0.0351032	-0.035031	-0.0349919	-0.0348319	-0.0341762	-0.0341356	-0.034079	-0.0339128	-0.0336698	-0.0336341	-0.0335913	-0.0332653	-0.0329443	-0.0329217	-0.0328687	-0.032678	-0.0325785	-0.032465	-0.0324376	-0.032298	-0.0322672	-0.0322154	-0.0320265	-0.0317779	-0.0316539	-0.0314224
-0.0410205	-0.0409304	-0.0408612	-0.0408553	-0.0401277	-0.0396346	-0.0390611	-0.0389299	-0.038836	-0.0387728	-0.0384798	-0.037965	-0.0378224	-0.0368598	-0.0367775	-0.0367168	-0.036661	-0.0363176	-0.0360165	-0.0358201	-0.0357962	-0.0357772	-0.0355689	-0.0351117	-0.0351093	-0.0350372	-0.034998	-0.034838	-0.0341822	-0.0341415	-0.0340849	-0.0339187	-0.0336757	-0.03364	-0.0335972	-0.0332712	-0.0329501	-0.0329275	-0.0328744	-0.0326838	-0.0325842	-0.0324707	-0.0324433	-0.0323036	-0.0322728	-0.0322211	-0.0320321	-0.0317835	-0.0316594	-0.031428
[truncated: 680 more rows]
[truncated: 950 more columns]

## Sheet: SAMPLE
V1	254.595	248.533	218.529	280.146	281.276	268.102	271.217	239.528	270.95	239.076	263.166	264.715	299.42	280.501	287.821	238.28	251.775	255.534	295.566	272.35	254.552	255.854	304.119	223.938	255.611	255.08	303.945	293.819	273.294	296.914	319.574	244.695	234.488	297.558	302.124	275.388	247.294	307.703	296.443	274.476	254.557	267.968	271.994	298.197	240.807	252.998	265.857	286.612	282.697
[truncated: 1 more rows]
[truncated: 5,000 more columns]

## Sheet: Interpolation function
function [D0, D1] = fcn(Vin)
[truncated: 10 more rows]
